# Supplementary material
Source: Frontiers journal article supplement (https://www.frontiersin.org/articles/428514)
Supplement: Table_1.xls [file Table_1.xls]

## Sheet: Sheet 1
Supplemental Table 1. 6076 proteins (including 4666 proteins with quantitative information) identified with TMT-2D LC-MS/MS in human NFPAs.
Protein identified information										FSH-			FSH+			NFPA (FSH- plus FSH +)	Average Ratio (FSH+ /FSH-)
Protein accession	Protein description	Gene name	MW [kDa]	calc.pI	Score	Coverage [%]	#Peptides	#PSMs	#Unique peptides	FSH-_1	FSH-_2	FSH-_3	FSH+_1	FSH+_2	FSH+_3	Total quantity	Ratio (FSH+/FSH-)	p-value (FSH+/FSH-)
P14678	Small nuclear ribonucleoprotein-associated proteins B and B~	SNRPB	27.29	11.2	187	12.1	10	2	3	1.095	1.317	1.262	1.026	1.285	1.097	7.082	0.927599	0.435152
Q9NZ01	Very-long-chain enoyl-CoA reductase	TECR	41.22	9.5	122	11	7	3	3	1.224	1.121	1.163	1.069	1.167	0.933	6.677	0.903364	0.232908
Q8WUH6	Transmembrane protein 263	TMEM263	14.49	9.3	134	31.9	9	3	3	1.324	1.525	1.429	0.742	0.793	0.854	6.667	0.558439	0.000692466
Q5VT66	Mitochondrial amidoxime-reducing component 1	MARC1	41.88	9.12	155	14.5	6	5	4	1.229	1.252	1.265	0.96	0.969	0.992	6.667	0.779765	0.05
Q9HDC9	Adipocyte plasma membrane-associated protein	APMAP	50.52	5.82	90	10.1	5	4	5	1.38	1.483	1.382	0.802	0.753	0.856	6.656	0.567962	0.000172633
P48729	Casein kinase I isoform alpha	CSNK1A1	46.22	9.59	126	9.5	3	2	2	1.078	1.135	1.078	1.134	1.039	1.183	6.647	1.01975	0.674354
P02656	Apolipoprotein C-III	APOC3	12.45	5.23	229	16.2	4	1	1	1.26	1.315	1.329	0.899	0.91	0.89	6.603	0.691342	0.05
P04080	Cystatin-B	CSTB	13.48	6.96	511	50	17	3	4	1.231	1.044	1.083	1.107	1.03	1.096	6.591	0.962775	0.553663
P02766	Transthyretin	TTR	18.05	5.52	292	17	15	3	3	1.098	0.995	1.135	1.07	1.099	1.181	6.578	1.03779	0.491339
P01876	Ig alpha-1 chain C region	IGHA1	41.69	6.08	397	19.8	19	6	2	1.299	1.25	1.424	0.823	0.891	0.885	6.572	0.654166	0.05
Q7L5D6	Golgi to ER traffic protein 4 homolog	GET4	39.92	5.29	73	11.6	3	3	3	1.224	1.009	1.285	0.981	0.937	1.099	6.535	0.85759	0.176747
Q92665	28S ribosomal protein S31, mitochondrial	MRPS31	54.11	9.32	87	12.2	6	4	4	1.127	1.118	1.031	1.077	1.07	1.086	6.509	0.986874	0.687107
Q9BVK6	Transmembrane emp24 domain-containing protein 9	TMED9	30.35	7.82	416	13.2	20	4	3	1.216	1.354	1.34	0.877	0.811	0.899	6.497	0.661637	0.05
Q16222	UDP-N-acetylhexosamine pyrophosphorylase	UAP1	67.84	5.92	122	5.7	4	2	3	1.218	1.149	1.282	0.941	0.88	1.023	6.493	0.779392	0.05
P01241	Somatotropin	GH1	27.41	5.29	435	18	23	3	4	1.934	1.664	1.715	0.402	0.378	0.399	6.492	0.221909	7.76948e-05
P55795	Heterogeneous nuclear ribonucleoprotein H2	HNRNPH2	53.41	5.89	612	20.9	27	10	4	1.141	1.001	1.152	1.093	1.033	1.072	6.492	0.970856	0.587326
Q9NX14	NADH dehydrogenase [ubiquinone] 1 beta subcomplex subunit 11, mitochondrial	NDUFB11	18.97	5.17	126	26.8	6	3	3	1.144	0.999	1.128	1.035	1.059	1.121	6.486	0.98288	0.745058
P69905	Hemoglobin subunit alpha	HBA1	18.05	8.72	8493	40.8	357	4	3	1.073	1.102	1.141	1.04	1.044	1.085	6.485	0.955669	0.121453
P22352	Glutathione peroxidase 3	GPX3	29.43	8.26	48	5.3	3	1	1	0.912	0.763	1.049	1.334	1.134	1.29	6.482	1.37959	0.05
Q9UBS3	DnaJ homolog subfamily B member 9	DNAJB9	29.57	8.37	618	34.5	23	7	7	1.554	1.635	1.609	0.547	0.53	0.591	6.466	0.347645	4.08302e-06
Q96MW5	Conserved oligomeric Golgi complex subunit 8	COG8	71.99	5.12	67	4.2	3	3	3	1.356	1.108	1.285	0.923	0.854	0.933	6.459	0.722859	0.05
P23219	Prostaglandin G/H synthase 1	PTGS1	75.34	6.81	189	7.8	7	3	3	0.979	0.917	0.919	1.163	1.215	1.256	6.449	1.29094	0.05
Q969L2	Protein MAL2	MAL2	19.57	5.76	60	6.3	3	1	1	1.249	1.353	1.313	0.856	0.742	0.929	6.442	0.645466	0.05
P01236	Prolactin	PRL	29.24	6.5	674	41.4	36	7	8	1.991	1.893	1.939	0.188	0.194	0.217	6.422	0.102868	5.03734e-07
P78540	Arginase-2, mitochondrial	ARG2	42.05	6	254	23.7	12	6	6	1.247	1.217	1.267	0.875	0.893	0.917	6.416	0.719646	0.05
P05783	Keratin, type I cytoskeletal 18	KRT18	53.07	5.34	7295	68.8	363	28	27	1.861	1.781	1.816	0.306	0.325	0.322	6.411	0.174606	0.05
P49773	Histidine triad nucleotide-binding protein 1	HINT1	16.2	6.43	153	18.3	8	3	3	1.118	1.098	1.095	1.205	0.92	0.964	6.4	0.932951	0.491655
Q9UL25	Ras-related protein Rab-21	RAB21	29.09	8.11	65	10.2	3	2	2	1.242	1.151	1.157	0.958	0.915	0.966	6.389	0.799718	0.05
O43405	Cochlin	COCH	68.32	8.18	205	10.5	9	5	6	1.908	1.847	1.729	0.302	0.315	0.282	6.383	0.163931	8.87536e-06
Q9NRZ7	1-acyl-sn-glycerol-3-phosphate acyltransferase gamma	AGPAT3	49.88	8.96	104	10.9	7	4	4	0.991	1.047	1.087	1.104	1.027	1.115	6.371	1.03872	0.362339
P62841	40S ribosomal protein S15	RPS15	20.93	10.39	263	28.3	6	2	2	1.178	1.167	1.187	0.938	1.11	0.788	6.368	0.802945	0.129582
P35442	Thrombospondin-2	THBS2	144.1	4.62	936	15	32	14	12	1.823	1.843	1.799	0.348	0.264	0.29	6.367	0.16505	6.77436e-07
P39060	Collagen alpha-1(XVIII) chain	COL18A1	189.24	5.67	273	3.5	7	4	6	0.593	0.846	0.94	1.354	1.336	1.297	6.366	1.67591	0.00695313
P63208	S-phase kinase-associated protein 1	SKP1	22.94	4.4	246	35.6	19	7	6	0.947	0.915	0.924	1.243	1.2	1.125	6.354	1.28069	0.05
Q7Z7H5	Transmembrane emp24 domain-containing protein 4	TMED4	29.08	8.41	402	22	25	7	6	1.295	1.296	1.284	0.866	0.782	0.82	6.343	0.636903	0.05
P09972	Fructose-bisphosphate aldolase C	ALDOC	44.87	6.41	1384	25.3	35	8	5	1.194	1.229	1.221	0.984	0.823	0.88	6.331	0.737377	0.05
P01189	Pro-opiomelanocortin	POMC	34.39	7.56	77	6	5	2	2	2.055	1.936	1.878	0.15	0.17	0.134	6.323	0.0773556	4.47737e-06
Q96DI7	U5 small nuclear ribonucleoprotein 40 kDa protein	SNRNP40	44.33	8.34	159	20.4	8	4	5	1.19	1.118	1.159	0.957	0.937	0.961	6.322	0.823479	0.05
P51003	Poly(A) polymerase alpha	PAPOLA	95.62	6.96	79	5.6	4	3	4	1.204	1.257	1.317	0.827	0.859	0.858	6.322	0.673372	0.05
Q5HYK3	2-methoxy-6-polyprenyl-1,4-benzoquinol methylase, mitochondrial	COQ5	42.21	6.47	73	10.4	3	2	2	1.223	1.02	1.225	1.006	1.018	0.823	6.315	0.820934	0.0898433
Q96EP5	DAZ-associated protein 1	DAZAP1	47.94	8.73	91	7.6	4	2	2	1.027	0.917	1.053	1.042	1.258	1.015	6.312	1.10611	0.310215
P52756	RNA-binding protein 5	RBM5	104.98	5.94	94	5.2	4	4	3	1.149	0.973	1.161	1.114	0.945	0.969	6.311	0.922327	0.351612
Q8IWE2	Protein NOXP20	FAM114A1	70.44	4.61	52	8.7	3	3	4	1.601	1.454	1.527	0.568	0.566	0.59	6.306	0.376255	2.48571e-05
Q9ULV3	Cip1-interacting zinc finger protein	CIZ1	110.23	5.77	61	4.6	3	3	3	1.281	0.91	1.092	0.963	1.073	0.984	6.303	0.91989	0.50479
Q9BX68	Histidine triad nucleotide-binding protein 2, mitochondrial	HINT2	19.04	9.2	326	45.4	20	6	6	0.845	0.814	0.939	1.273	1.207	1.219	6.297	1.42379	0.05
Q7L1I2	Synaptic vesicle glycoprotein 2B	SV2B	85.58	5.26	88	4.8	7	4	4	1.283	1.254	1.196	0.841	0.87	0.849	6.293	0.685776	0.05
P05787	Keratin, type II cytoskeletal 8	KRT8	61.23	5.52	8670	62.3	447	37	31	1.821	1.777	1.801	0.288	0.291	0.311	6.289	0.164845	0.05
P61966	AP-1 complex subunit sigma-1A	AP1S1	22.39	5.6	301	15.8	6	2	2	0.969	1.07	1.237	1.014	0.957	1.038	6.285	0.918498	0.374337
Q9P0K1	Disintegrin and metalloproteinase domain-containing protein 22	ADAM22	117.2	6.91	42	2.3	3	3	3	1.386	1.325	1.317	0.752	0.776	0.728	6.284	0.560079	2.16387e-05
P21695	Glycerol-3-phosphate dehydrogenase [NAD(+)], cytoplasmic	GPD1	44.13	5.81	78	7.2	5	3	2	0.904	1.195	1.158	0.941	1.101	0.983	6.282	0.928769	0.507871
Q5XKE5	Keratin, type II cytoskeletal 79	KRT79	64.96	6.75	204	11.8	17	8	2	1.887	1.767	1.754	0.277	0.3	0.293	6.278	0.160873	0.05
Q9UNL2	Translocon-associated protein subunit gamma	SSR3	25.19	9.61	167	11.9	5	2	3	1.286	1.121	1.33	0.844	0.826	0.87	6.277	0.67969	0.05
P51688	N-sulphoglucosamine sulphohydrolase	SGSH	60.15	6.46	72	5	3	2	2	0.983	1.199	1.115	1.04	0.919	1.011	6.267	0.900819	0.224863
O75648	Mitochondrial tRNA-specific 2-thiouridylase 1	TRMU	54.24	8.24	70	8.3	3	3	3	0.924	1.101	1.032	1.09	1.055	1.065	6.267	1.05005	0.427474
Q15293	Reticulocalbin-1	RCN1	45.28	4.86	290	19.9	11	5	5	1.496	1.454	1.336	0.666	0.669	0.644	6.265	0.461736	9.27488e-05
Q8NFH3	Nucleoporin Nup43	NUP43	44.64	5.31	91	8.2	4	2	2	0.998	1.085	1.216	1.043	0.924	0.998	6.264	0.898757	0.218009
Q7RTW8	Otoancorin	OTOA	141.68	5.53	110	1.2	11	2	2	2.082	2.037	1.966	0.058	0.053	0.06	6.256	0.0281019	5.19336e-07
P21359	Neurofibromin	NF1	363.09	7.1	66	1.2	3	3	3	1.002	1.06	1.068	0.955	1.054	1.113	6.252	0.997444	0.9615
Q8IYB5	Stromal membrane-associated protein 1	SMAP1	59.41	8.92	47	5.4	3	2	2	1.127	0.857	1.09	1.048	1.07	1.06	6.252	1.03383	0.721757
P16435	NADPH--cytochrome P450 reductase	POR	85.58	5.38	324	23.2	22	15	16	1.256	1.294	1.196	0.835	0.851	0.82	6.252	0.66898	0.05
P17568	NADH dehydrogenase [ubiquinone] 1 beta subcomplex subunit 7	NDUFB7	19.37	9.1	73	18.2	3	2	2	1.103	1.052	1.079	1.056	1.039	0.922	6.251	0.9329	0.221931
P02790	Hemopexin	HPX	57.43	6.55	229	8.4	12	3	4	1.198	1.182	1.193	0.942	0.855	0.88	6.25	0.74923	0.05
Q14320	Protein FAM50A	FAM50A	50.53	6.39	61	9.7	3	2	3	0.993	1.112	1.083	0.989	0.973	1.099	6.249	0.960163	0.472725
O15173	Membrane-associated progesterone receptor component 2	PGRMC2	26.84	4.76	612	20.2	16	6	5	1.211	1.201	1.232	0.904	0.862	0.838	6.248	0.714599	0.05
P49447	Cytochrome b561	CYB561	29.77	8.73	59	10.4	3	2	2	0.994	0.888	0.979	1.118	1.139	1.129	6.247	1.1835	0.05
Q16775	Hydroxyacylglutathione hydrolase, mitochondrial	HAGH	39.28	8.35	394	19.8	20	6	6	1.132	1.076	1.092	1.011	0.976	0.957	6.244	0.892121	0.05
Q969H8	Myeloid-derived growth factor	MYDGF	21.19	6.2	66	8.7	5	3	3	1.436	1.365	1.332	0.716	0.693	0.697	6.239	0.509557	2.79117e-05
P15735	Phosphorylase b kinase gamma catalytic chain, liver/testis isoform	PHKG2	50.48	5.95	92	9.9	4	3	3	1.128	1.014	1.05	1.013	1.009	1.024	6.238	0.954261	0.284035
O95674	Phosphatidate cytidylyltransferase 2	CDS2	55.85	6.64	267	12.6	11	5	5	1.011	1.035	1.02	1.098	0.989	1.085	6.238	1.03457	0.41284
Q9H3P7	Golgi resident protein GCP60	ACBD3	67.94	5.02	288	14.6	13	6	7	1.365	1.272	1.36	0.745	0.73	0.759	6.231	0.558919	4.76274e-05
P02763	Alpha-1-acid glycoprotein 1	ORM1	27.16	4.93	56	8.5	4	2	1	1.381	1.254	1.236	0.807	0.822	0.729	6.229	0.609145	0.000730368
P01877	Ig alpha-2 chain C region	IGHA2	40.28	5.71	290	17.1	15	5	1	1.229	1.247	1.271	0.828	0.779	0.87	6.224	0.661062	0.05
Q00688	Peptidyl-prolyl cis-trans isomerase FKBP3	FKBP3	33.47	9.29	188	24.1	12	5	6	1.12	1.178	1.203	0.863	0.922	0.928	6.214	0.774921	0.05
Q9Y6F6	Protein MRVI1	MRVI1	109.72	5.44	58	3.6	3	2	3	0.908	0.807	0.812	1.222	1.247	1.217	6.213	1.45865	0.05
Q99933	BAG family molecular chaperone regulator 1	BAG1	44.94	7.68	109	8.1	5	3	3	1.056	1.026	1.08	1.018	0.981	1.052	6.213	0.964896	0.229255
Q9BT22	Chitobiosyldiphosphodolichol beta-mannosyltransferase	ALG1	57.64	6.81	82	7.3	4	4	4	1.024	0.888	1.078	1.038	1.088	1.095	6.211	1.07726	0.304898
P50914	60S ribosomal protein L14	RPL14	32.24	10.94	92	5.6	3	1	1	0.913	1.238	1.124	0.821	1.259	0.855	6.21	0.896183	0.545869
P28069	Pituitary-specific positive transcription factor 1	POU1F1	38.16	8.36	72	4.8	2	1	1	1.7	1.806	1.741	0.287	0.328	0.344	6.206	0.182771	2.20301e-06
P10599	Thioredoxin	TXN	14.99	4.82	568	31.4	29	4	4	0.991	0.948	0.92	1.137	1.044	1.166	6.206	1.17069	0.05
Q9NR30	Nucleolar RNA helicase 2	DDX21	108.89	9.32	243	12.6	15	11	9	1.353	1.301	1.378	0.714	0.729	0.73	6.205	0.538938	1.18038e-05
P20340	Ras-related protein Rab-6A	RAB6A	26.9	5.42	288	34.6	19	7	3	1.045	1.121	1.054	1.008	0.978	0.999	6.205	0.927019	0.0680922
P48556	26S proteasome non-ATPase regulatory subunit 8	PSMD8	45.6	9.73	130	15.4	8	6	6	1.1	1.093	1.105	0.937	1.005	0.964	6.204	0.88114	0.05
P62942	Peptidyl-prolyl cis-trans isomerase FKBP1A	FKBP1A	14.06	7.88	141	29.6	6	2	3	1.203	1.084	1.131	0.889	0.964	0.933	6.204	0.815097	0.05
Q15067	Peroxisomal acyl-coenzyme A oxidase 1	ACOX1	84.74	8.35	34	3.8	2	2	3	1.097	1.112	1.181	0.938	0.908	0.966	6.202	0.829499	0.05
Q9H488	GDP-fucose protein O-fucosyltransferase 1	POFUT1	49.88	8.77	58	4.9	3	2	2	1.053	1.01	1.098	1.089	0.947	1.005	6.202	0.962037	0.463825
Q9BZF1	Oxysterol-binding protein-related protein 8	OSBPL8	122.16	6.52	99	4.6	3	3	4	1.055	1.035	1.067	1.054	0.995	0.995	6.201	0.964207	0.186562
P35558	Phosphoenolpyruvate carboxykinase, cytosolic [GTP]	PCK1	79.11	5.8	151	13.3	12	9	9	1.746	1.653	1.671	0.382	0.373	0.375	6.2	0.22288	1.34666e-06
P0DJI8	Serum amyloid A-1 protein	SAA1	14.96	6.28	120	29.5	5	3	3	1.526	1.59	1.646	0.432	0.536	0.47	6.2	0.301974	1.77693e-05
P61923	Coatomer subunit zeta-1	COPZ1	22.99	4.69	102	11.9	5	2	2	1.189	1.243	1.314	0.789	0.783	0.881	6.199	0.654832	0.05
Q9NYI0	PH and SEC7 domain-containing protein 3	PSD3	136.35	5.68	46	2.7	3	3	3	1.094	1.138	1.051	0.903	1.06	0.953	6.199	0.888212	0.100517
Q86SE5	RNA-binding Raly-like protein	RALYL	38.84	7.7	60	8.2	3	3	2	1.934	1.802	1.809	0.228	0.224	0.202	6.199	0.117944	3.0645e-06
Q02447	Transcription factor Sp3	SP3	87.26	5.1	111	2	3	1	1	1.922	1.449	1.634	0.417	0.404	0.373	6.199	0.238561	0.00077881
Q9H0U3	Magnesium transporter protein 1	MAGT1	42.08	9.68	67	6.3	3	2	2	1.009	0.944	0.963	1.137	1.081	1.064	6.198	1.12551	0.05
Q9NYL4	Peptidyl-prolyl cis-trans isomerase FKBP11	FKBP11	26.23	9.44	281	17.9	13	3	3	1.814	1.671	1.747	0.34	0.297	0.326	6.195	0.18406	5.06758e-06
Q96AJ9	Vesicle transport through interaction with t-SNAREs homolog 1A	VTI1A	27.72	6.06	145	14.3	4	3	3	1.021	0.987	1.074	1.06	0.987	1.063	6.192	1.00909	0.805458
Q9Y2B0	Protein canopy homolog 2	CNPY2	23.27	4.81	243	28	10	4	4	1.331	1.211	1.129	0.916	0.786	0.819	6.192	0.686734	0.05
Q08379	Golgin subfamily A member 2	GOLGA2	126.94	5	614	21.4	28	19	19	1.314	1.26	1.304	0.766	0.754	0.792	6.19	0.596184	1.28608e-05
P04350	Tubulin beta-4A chain	TUBB4A	53.45	4.78	2253	61.3	111	20	3	0.924	0.972	0.976	1.094	1.179	1.044	6.189	1.15494	0.05
P63027	Vesicle-associated membrane protein 2	VAMP2	14.54	7.85	652	34.5	18	3	1	0.946	0.872	0.87	1.262	1.113	1.125	6.188	1.30208	0.05
Q5K4L6	Long-chain fatty acid transport protein 3	SLC27A3	83.75	7.25	218	7.5	4	3	3	0.738	0.684	0.891	1.296	1.276	1.301	6.186	1.67445	0.00113738
Q16143	Beta-synuclein	SNCB	17.03	4.41	280	23.1	11	3	1	0.959	0.84	0.757	1.2	1.2	1.23	6.186	1.42019	0.05
Q9UJC3	Protein Hook homolog 1	HOOK1	99.66	5.09	108	9.1	7	6	7	0.975	0.956	1.094	1.084	1.023	1.054	6.186	1.04496	0.411245
O94766	Galactosylgalactosylxylosylprotein 3-beta-glucuronosyltransferase 3	B3GAT3	40.48	8.39	137	14.6	7	6	6	1.35	1.26	1.328	0.768	0.747	0.732	6.185	0.570594	4.14808e-05
P31943	Heterogeneous nuclear ribonucleoprotein H	HNRNPH1	53.38	5.89	850	30.1	34	11	4	1.195	1.22	1.192	0.83	0.859	0.888	6.184	0.714444	0.05
Q12824	SWI/SNF-related matrix-associated actin-dependent regulator of chromatin subfamily B member 1	SMARCB1	50.59	5.86	81	8.8	5	4	4	1.153	1.07	0.979	1.007	0.986	0.988	6.183	0.930981	0.279297
Q9BZF3	Oxysterol-binding protein-related protein 6	OSBPL6	121.59	6.48	111	5.4	6	4	5	0.913	0.85	0.979	1.124	1.162	1.153	6.181	1.25419	0.05
P28072	Proteasome subunit beta type-6	PSMB6	26.71	4.8	489	23.4	22	6	6	1.136	1.175	1.115	0.917	0.882	0.956	6.181	0.804145	0.05
O14980	Exportin-1	XPO1	138.88	5.71	231	10.7	15	10	10	1.205	1.123	1.129	0.866	0.965	0.891	6.179	0.787388	0.05
Q9BVI4	Nucleolar complex protein 4 homolog	NOC4L	64.1	7.08	68	4.3	3	2	2	1.181	1.154	1.192	0.866	0.904	0.882	6.179	0.751914	0.05
Q96FV2	Secernin-2	SCRN2	49.31	5.44	124	12.7	6	4	4	1.143	1.057	1.005	0.938	0.936	1.098	6.177	0.927301	0.316016
Q5KSL6	Diacylglycerol kinase kappa	DGKK	160.18	5.36	47	1.3	2	2	2	1.708	1.678	1.598	0.388	0.4	0.404	6.176	0.239165	2.83568e-06
P26038	Moesin	MSN	82.33	6.08	759	32.4	54	23	19	1.443	1.421	1.438	0.642	0.61	0.622	6.176	0.435611	2.41293e-07
P19652	Alpha-1-acid glycoprotein 2	ORM2	27.08	5.03	102	14.4	5	3	2	1.345	1.227	1.398	0.768	0.685	0.753	6.176	0.555668	0.000485563
Q8NI37	Protein phosphatase PTC7 homolog	PPTC7	35.55	4.99	127	8.9	3	2	2	1.205	1.088	1.239	0.896	0.858	0.89	6.176	0.748584	0.05
Q8NBS9	Thioredoxin domain-containing protein 5	TXNDC5	54.47	5.63	185	14.6	9	5	5	1.21	1.122	1.217	0.88	0.858	0.888	6.175	0.739927	0.05
O95786	Probable ATP-dependent RNA helicase DDX58	DDX58	127.72	6.03	145	5	4	4	4	1.175	1.178	1.218	0.832	0.927	0.844	6.174	0.728927	0.05
P07711	Cathepsin L1	CTSL	43.04	5.31	106	9.9	6	3	3	1.08	1.076	1.079	1.032	0.956	0.951	6.174	0.908501	0.0635687
P37802	Transgelin-2	TAGLN2	25.53	8.41	429	39.7	21	7	6	0.961	0.866	0.996	1.108	1.143	1.1	6.174	1.18704	0.05
P22466	Galanin peptides	GAL	14.9	6.84	56	25.2	3	3	3	1.665	1.597	1.615	0.439	0.432	0.425	6.173	0.265737	5.45641e-07
Q6UW68	Transmembrane protein 205	TMEM205	22.84	8.91	173	22.2	5	3	3	1.093	0.988	1.027	1.02	1.015	1.03	6.173	0.986165	0.687269
Q15642	Cdc42-interacting protein 4	TRIP10	78.16	5.55	74	6.7	4	4	4	0.949	0.917	1.149	0.979	1.043	1.135	6.172	1.0471	0.61487
P62330	ADP-ribosylation factor 6	ARF6	23.39	9.04	180	30.3	9	5	4	1.134	1.091	0.933	1.009	1.073	0.931	6.171	0.954085	0.552116
P55735	Protein SEC13 homolog	SEC13	39.93	5.22	262	23.6	9	6	6	1.205	1.258	1.091	0.914	0.852	0.85	6.17	0.736072	0.05
P05937	Calbindin	CALB1	36.25	4.7	94	16.9	7	5	5	1.528	1.506	1.483	0.485	0.613	0.554	6.169	0.365729	1.68484e-05
P18669	Phosphoglycerate mutase 1	PGAM1	33.25	6.67	889	44.9	46	9	10	1.226	1.194	1.193	0.867	0.829	0.86	6.169	0.707445	0.05
Q8TC12	Retinol dehydrogenase 11	RDH11	39.89	9.05	274	8.8	7	3	3	0.946	0.92	0.962	1.14	1.085	1.116	6.169	1.1814	0.05
P04424	Argininosuccinate lyase	ASL	56.72	6.04	95	12.7	6	5	5	1.01	0.996	1.071	1	1.071	1.021	6.169	1.00487	0.880512
P62318	Small nuclear ribonucleoprotein Sm D3	SNRPD3	16.54	10.33	166	15.1	9	2	2	1.088	1.172	0.97	0.924	1.06	0.954	6.168	0.909598	0.25338
Q68D91	Metallo-beta-lactamase domain-containing protein 2	MBLAC2	33.36	6.41	126	17.2	9	4	4	1.135	1.076	1.133	0.976	0.872	0.976	6.168	0.844498	0.05
P12081	Histidine--tRNA ligase, cytoplasmic	HARS	68.03	5.72	259	23.8	19	12	9	1.451	1.452	1.421	0.625	0.604	0.613	6.166	0.425994	2.52258e-07
P52597	Heterogeneous nuclear ribonucleoprotein F	HNRNPF	49.88	5.38	332	26.7	18	8	8	1.11	1.101	1.078	0.976	0.959	0.942	6.166	0.874734	0.05
Q0VDG4	Secernin-3	SCRN3	56.07	5.38	62	5.9	3	2	2	1.242	1.056	1.165	0.884	0.878	0.941	6.166	0.780537	0.05
P09651	Heterogeneous nuclear ribonucleoprotein A1	HNRNPA1	43.19	9.17	1044	40.3	46	13	10	1.24	1.242	1.238	0.815	0.789	0.841	6.165	0.657258	0.05
Q7L0Y3	Mitochondrial ribonuclease P protein 1	TRMT10C	58.14	9.4	69	7.2	3	2	2	0.874	0.871	0.982	1.113	1.212	1.111	6.163	1.25999	0.05
O14975	Very long-chain acyl-CoA synthetase	SLC27A2	80.69	8.75	239	15.6	11	8	9	1.512	1.473	1.468	0.534	0.603	0.57	6.16	0.383337	2.96589e-06
Q8TD06	Anterior gradient protein 3 homolog	AGR3	22.25	7.77	229	24.1	11	5	5	0.466	0.506	0.587	1.512	1.516	1.573	6.16	2.95125	1.53777e-05
Q15363	Transmembrane emp24 domain-containing protein 2	TMED2	25.38	5.08	383	22.9	21	4	4	1.364	1.328	1.32	0.732	0.714	0.7	6.158	0.534895	2.88487e-06
P0C0L5	Complement C4-B	C4B	212.04	6.89	1302	16.2	70	28	3	1.034	1.141	1.1	0.972	0.933	0.978	6.158	0.880305	0.05
Q5T2T1	MAGUK p55 subfamily member 7	MPP7	77.8	6.65	44	3.1	3	2	2	1.573	1.613	1.629	0.512	0.392	0.438	6.157	0.278712	7.45166e-06
P07196	Neurofilament light polypeptide	NEFL	70.47	4.64	538	22.5	32	15	13	1.331	1.334	1.329	0.704	0.759	0.7	6.157	0.541562	5.70582e-06
P57737	Coronin-7	CORO7	108.5	5.51	79	3.1	4	3	3	1.257	1.315	1.242	0.773	0.764	0.804	6.155	0.613791	4.18333e-05
Q14554	Protein disulfide-isomerase A5	PDIA5	72.9	8.08	90	6	4	3	3	1.111	1.075	1.086	0.922	0.998	0.963	6.155	0.881112	0.05
Q9NQW7	Xaa-Pro aminopeptidase 1	XPNPEP1	79.27	5.42	170	11.9	9	7	6	1.099	1.201	1.145	0.817	1.017	0.876	6.155	0.786647	0.05
Q6PIU2	Neutral cholesterol ester hydrolase 1	NCEH1	51.1	6.76	155	9.3	5	4	4	1.042	0.954	0.977	1.055	1.05	1.077	6.155	1.0703	0.10734
Q99807	5-demethoxyubiquinone hydroxylase, mitochondrial	COQ7	26.72	8.77	122	14.3	5	3	3	1.096	1.173	1.22	0.863	0.891	0.911	6.154	0.763829	0.05
Q9NXL6	SID1 transmembrane family member 1	SIDT1	102.54	6.95	69	2.3	4	3	3	1.017	0.947	0.983	1.072	1.066	1.068	6.153	1.08789	0.05
P69891	Hemoglobin subunit gamma-1	HBG1	19.17	6.64	744	41.5	32	6	6	1.358	1.336	1.338	0.704	0.693	0.723	6.152	0.525794	5.77156e-07
P49069	Calcium signal-modulating cyclophilin ligand	CAMLG	37.57	8.2	89	13.9	4	3	3	0.897	0.926	0.884	1.103	1.197	1.145	6.152	1.27263	0.05
Q96CX2	BTB/POZ domain-containing protein KCTD12	KCTD12	38.03	5.51	146	14.5	8	4	4	1.396	1.238	1.294	0.802	0.692	0.729	6.151	0.565937	0.000546416
P50225	Sulfotransferase 1A1	SULT1A1	39.3	6.16	114	16.9	5	5	5	0.651	0.548	0.661	1.458	1.373	1.46	6.151	2.30699	6.15866e-05
Q16718	NADH dehydrogenase [ubiquinone] 1 alpha subcomplex subunit 5	NDUFA5	16.49	5.75	162	34.5	10	4	4	0.918	0.888	0.922	1.132	1.135	1.156	6.151	1.25477	0.05
P21964	Catechol O-methyltransferase	COMT	33.91	5.26	136	14.4	8	4	4	0.973	0.946	0.979	1.057	1.09	1.105	6.15	1.12215	0.05
P50750	Cyclin-dependent kinase 9	CDK9	50.02	8.97	95	10.2	5	4	3	1.143	0.999	1.149	0.935	0.963	0.961	6.15	0.868733	0.0944448
Q08722	Leukocyte surface antigen CD47	CD47	40.4	6.82	327	11.5	12	5	5	1.06	0.911	1.059	1.027	1.065	1.028	6.15	1.0297	0.610335
Q15056	Eukaryotic translation initiation factor 4H	EIF4H	30.18	6.67	220	16.9	7	3	3	1.2	1.202	1.131	0.882	0.851	0.884	6.15	0.74073	0.05
P32322	Pyrroline-5-carboxylate reductase 1, mitochondrial	PYCR1	37.69	7.18	176	11	3	2	2	1.667	1.505	1.599	0.463	0.393	0.523	6.15	0.289038	4.71342e-05
Q8WWV3	Reticulon-4-interacting protein 1, mitochondrial	RTN4IP1	51.29	9.22	111	9.8	7	3	4	1.005	1.089	1.059	1.004	0.978	1.015	6.15	0.950523	0.156565
Q9Y315	Deoxyribose-phosphate aldolase	DERA	40.76	9.08	93	11.3	5	4	4	1.07	1.108	1.091	0.931	0.942	1.007	6.149	0.881003	0.05
Q8NFJ9	Bardet-Biedl syndrome 1 protein	BBS1	72.6	8.03	118	7.9	4	3	3	1.051	0.98	1.066	1.063	0.943	1.045	6.148	0.985147	0.756431
P13667	Protein disulfide-isomerase A4	PDIA4	88.35	4.96	1309	38	59	23	22	1.35	1.294	1.298	0.744	0.73	0.731	6.147	0.559361	6.33538e-06
P12821	Angiotensin-converting enzyme	ACE	162.79	5.95	346	8.3	17	11	11	1.46	1.454	1.454	0.586	0.605	0.588	6.147	0.40728	1.75906e-08
O75962	Triple functional domain protein	TRIO	395.82	5.94	86	1.2	5	4	3	0.953	1.075	0.893	1.104	1.028	1.093	6.146	1.10407	0.190057
P60033	CD81 antigen	CD81	29.45	5.09	171	8.5	3	1	1	0.896	0.799	0.968	1.167	1.073	1.242	6.145	1.30755	0.05
Q9BT17	Mitochondrial ribosome-associated GTPase 1	MTG1	42.88	9.54	114	7.5	4	3	2	0.95	0.941	0.955	1.095	1.101	1.103	6.145	1.15917	0.05
P12277	Creatine kinase B-type	CKB	47.94	5.34	772	41.7	30	13	12	1.146	1.157	1.132	0.911	0.937	0.861	6.144	0.788646	0.05
Q8IZU2	WD repeat-containing protein 17	WDR17	167.53	6.01	37	2.6	3	3	3	0.916	0.996	1.084	1.004	1.072	1.072	6.144	1.05073	0.417566
P49327	Fatty acid synthase	FASN	295.58	6.01	998	14	54	29	32	1.293	1.292	1.36	0.698	0.737	0.763	6.143	0.557161	3.82177e-05
P42658	Dipeptidyl aminopeptidase-like protein 6	DPP6	110.07	5.95	65	2.8	3	3	3	1.459	1.422	1.388	0.62	0.645	0.608	6.142	0.438744	4.26189e-06
O94855	Protein transport protein Sec24D	SEC24D	124.79	6.91	109	4.8	7	5	5	1.379	1.379	1.427	0.648	0.691	0.618	6.142	0.467622	9.7138e-06
Q12860	Contactin-1	CNTN1	126.94	5.62	238	12.1	14	11	11	1.215	1.121	1.136	0.927	0.858	0.885	6.142	0.769009	0.05
Q53RD9	Fibulin-7	FBLN7	51.58	7.88	36	2.1	2	1	1	1.539	1.638	1.524	0.48	0.489	0.472	6.142	0.306531	7.25338e-06
Q99627	COP9 signalosome complex subunit 8	COPS8	25.1	5.25	257	28.7	7	4	4	1.12	1.021	1.124	0.944	0.914	1.019	6.142	0.881164	0.05
Q01995	Transgelin	TAGLN	26.78	8.87	474	43.3	26	9	8	1.593	1.543	1.521	0.506	0.472	0.506	6.141	0.31866	1.61968e-06
Q5JSL3	Dedicator of cytokinesis protein 11	DOCK11	277.95	7.87	217	4.2	10	9	8	1.391	1.217	1.361	0.726	0.721	0.725	6.141	0.547241	0.000368297
Q13425	Beta-2-syntrophin	SNTB2	63.64	9.03	233	11.1	9	6	5	0.723	0.771	0.773	1.285	1.269	1.319	6.14	1.70843	1.69537e-05
P01031	Complement C5	C5	217.4	6.11	105	4.8	9	9	10	1.201	1.117	1.131	0.919	0.899	0.872	6.139	0.779936	0.05
P00338	L-lactate dehydrogenase A chain	LDHA	43.6	8.44	589	30.4	35	11	9	1.048	1.19	1.186	0.8	0.985	0.929	6.138	0.79264	0.05
Q63HM9	PI-PLC X domain-containing protein 3	PLCXD3	41.39	5.87	77	10.6	4	3	3	1.461	1.644	1.619	0.483	0.452	0.479	6.138	0.299323	4.53282e-05
Q9H6R3	Acyl-CoA synthetase short-chain family member 3, mitochondrial	ACSS3	85.9	8.84	138	8.2	10	7	7	1.375	1.318	1.391	0.667	0.687	0.7	6.138	0.502938	9.64155e-06
Q16875	6-phosphofructo-2-kinase/fructose-2,6-bisphosphatase 3	PFKFB3	68.39	8.49	146	9.8	8	5	4	1.285	1.218	1.257	0.832	0.764	0.781	6.137	0.632181	0.05
Q9Y5M8	Signal recognition particle receptor subunit beta	SRPRB	33.81	9.17	209	25.5	10	6	6	1.214	1.239	1.237	0.769	0.891	0.785	6.135	0.662602	0.05
P40938	Replication factor C subunit 3	RFC3	47.06	8.66	82	11.8	4	3	3	0.958	1.011	1.044	0.969	1.068	1.085	6.135	1.03618	0.460622
Q7Z5K2	Wings apart-like protein homolog	WAPAL	156.97	5.27	57	3.7	4	4	4	1.058	1.054	1.096	0.962	0.946	1.019	6.135	0.912406	0.05
Q8IY81	pre-rRNA processing protein FTSJ3	FTSJ3	116.84	8.53	44	2.4	2	2	2	1.53	1.45	1.542	0.54	0.538	0.534	6.134	0.356479	4.71877e-06
P83436	Conserved oligomeric Golgi complex subunit 7	COG7	97.52	5.27	111	7	7	5	5	1.17	1.184	1.237	0.853	0.809	0.881	6.134	0.708159	0.05
Q5VYK3	Proteasome-associated protein ECM29 homolog	ECM29	236.46	6.74	109	4.5	8	8	9	1.112	1.086	1.161	0.892	0.972	0.911	6.134	0.826139	0.05
P54578	Ubiquitin carboxyl-terminal hydrolase 14	USP14	67.03	5.2	343	20.2	24	10	11	1.142	1.145	1.141	0.89	0.913	0.902	6.133	0.78909	0.05
Q9HCB6	Spondin-1	SPON1	105.45	5.85	62	1.2	2	1	1	1.525	1.461	1.54	0.518	0.534	0.555	6.133	0.35506	3.27855e-06
P19388	DNA-directed RNA polymerases I, II, and III subunit RPABC1	POLR2E	27.86	5.69	64	8.6	3	2	2	1.17	1.157	1.104	0.895	0.914	0.892	6.132	0.787234	0.05
P12036	Neurofilament heavy polypeptide	NEFH	151.14	5.99	268	3	14	3	2	1.163	1.174	1.048	0.826	0.983	0.938	6.132	0.811521	0.05
Q8TB73	Protein NDNF	NDNF	78.55	9.07	91	4.8	4	3	3	1.686	1.603	1.633	0.394	0.405	0.41	6.131	0.245632	9.52407e-07
Q7Z3E2	Coiled-coil domain-containing protein 186	CCDC186	129.29	5.94	48	2	3	2	2	1.213	1.165	1.128	0.819	0.93	0.876	6.131	0.748716	0.05
P25685	DnaJ homolog subfamily B member 1	DNAJB1	44.84	8.74	207	14.7	9	6	6	1.13	1.136	1.212	0.861	0.878	0.914	6.131	0.762795	0.05
Q92598	Heat shock protein 105 kDa	HSPH1	116.28	5.28	344	13.5	16	12	9	1.306	1.272	1.271	0.754	0.758	0.769	6.13	0.592621	1.86149e-06
P19823	Inter-alpha-trypsin inhibitor heavy chain H2	ITIH2	121.98	6.4	445	9.7	17	9	10	1.244	1.207	1.184	0.868	0.824	0.803	6.13	0.686382	0.05
O15294	UDP-N-acetylglucosamine--peptide N-acetylglucosaminyltransferase 110 kDa subunit	OGT	130.48	6.22	80	3.9	5	4	4	1.045	0.942	1.045	1.073	0.992	1.032	6.129	1.02144	0.632973
Q13439	Golgin subfamily A member 4	GOLGA4	327.2	5.33	243	8.1	19	16	17	1.263	1.246	1.262	0.771	0.775	0.812	6.129	0.625298	0.05
Q96AG3	Solute carrier family 25 member 46	SLC25A46	49.64	6.97	62	2.9	4	1	1	1.054	0.936	0.959	1.107	0.982	1.091	6.129	1.07833	0.222925
O15504	Nucleoporin-like protein 2	NUPL2	50.29	9.25	48	3.3	2	2	2	1.214	0.929	1.135	1.031	0.963	0.857	6.129	0.869738	0.238685
P63098	Calcineurin subunit B type 1	PPP3R1	23.07	4.64	87	20	4	2	3	1.096	1.111	1.141	0.93	0.914	0.937	6.129	0.830645	0.05
Q9BRJ7	Protein syndesmos	NUDT16L1	25.79	9.07	80	15.2	4	3	2	1.077	1.201	1.056	0.81	1.263	0.722	6.129	0.838332	0.397448
Q9Y6M5	Zinc transporter 1	SLC30A1	61.33	6.02	67	6.9	3	3	3	1.093	1.008	0.981	1.073	0.962	1.012	6.129	0.988644	0.814562
P30086	Phosphatidylethanolamine-binding protein 1	PEBP1	24.82	7.01	422	30.5	15	4	4	1.007	1.148	1.057	0.898	1.032	0.986	6.128	0.907846	0.158657
P63151	Serine/threonine-protein phosphatase 2A 55 kDa regulatory subunit B alpha isoform	PPP2R2A	59.28	5.82	147	10.7	9	5	2	1.009	1.127	1.061	0.964	0.994	0.973	6.128	0.916797	0.113709
Q9Y6K5	2~-5~-oligoadenylate synthase 3	OAS3	136.15	8.73	102	3.8	4	4	5	1.251	1.28	1.323	0.735	0.739	0.799	6.127	0.589777	5.71294e-05
Q9Y680	Peptidyl-prolyl cis-trans isomerase FKBP7	FKBP7	36.29	6.09	74	15.4	5	4	4	1.418	1.356	1.37	0.644	0.651	0.687	6.126	0.478282	6.20347e-06
Q9Y262	Eukaryotic translation initiation factor 3 subunit L	EIF3L	75.62	5.93	169	8.7	10	4	4	1.058	1.062	1.092	0.967	0.981	0.966	6.126	0.907223	0.05
P82094	TATA element modulatory factor	TMF1	144.36	4.88	168	9.5	9	7	11	1.23	1.174	1.109	0.874	0.854	0.885	6.126	0.743809	0.05
Q01415	N-acetylgalactosamine kinase	GALK2	57.67	6.19	51	7.2	3	3	4	1.088	1.088	1.095	0.845	1.005	1.005	6.126	0.872822	0.121266
Q8WZA9	Immunity-related GTPase family Q protein	IRGQ	66.63	4.81	186	11.6	9	6	6	1.206	1.277	1.202	0.818	0.78	0.843	6.126	0.662415	0.05
P62244	40S ribosomal protein S15a	RPS15A	17.69	10.14	102	27.7	6	3	4	1.068	1.083	1.008	0.982	0.996	0.988	6.125	0.938905	0.102659
Q01844	RNA-binding protein EWS	EWSR1	73.08	9.37	116	3.5	6	2	2	0.781	0.807	0.789	1.293	1.263	1.191	6.124	1.57636	0.05
P09110	3-ketoacyl-CoA thiolase, peroxisomal	ACAA1	49.42	8.76	231	10.4	7	4	4	0.913	0.959	0.965	1.091	1.112	1.083	6.123	1.15827	0.05
Q9UHB9	Signal recognition particle subunit SRP68	SRP68	82.89	8.75	179	11.5	10	7	7	1.213	1.136	1.191	0.865	0.862	0.856	6.123	0.729661	0.05
Q99729	Heterogeneous nuclear ribonucleoprotein A/B	HNRNPAB	43.19	8.22	111	13.3	9	6	3	1.433	1.381	1.29	0.675	0.65	0.693	6.122	0.491715	9.04472e-05
O75531	Barrier-to-autointegration factor	BANF1	12.57	5.81	66	25.8	4	3	3	0.923	0.918	1.016	1.071	1.099	1.095	6.122	1.14281	0.05
P23083	Ig heavy chain V-I region V35	P23083	14.49	9.59	44	10.3	2	1	1	1.555	1.527	1.477	0.541	0.5	0.521	6.121	0.342619	2.61694e-06
Q96AQ6	Pre-B-cell leukemia transcription factor-interacting protein 1	PBXIP1	90.22	5.21	587	21.5	27	14	14	1.248	1.233	1.242	0.787	0.788	0.823	6.121	0.644104	0.05
P06213	Insulin receptor	INSR	174.5	5.83	243	6.9	11	9	9	1.607	1.503	1.503	0.518	0.497	0.493	6.121	0.326902	8.26093e-06
O00571	ATP-dependent RNA helicase DDX3X	DDX3X	81.16	6.73	663	23.7	35	15	5	1.061	1.137	1.06	0.952	0.948	0.963	6.121	0.87876	0.05
Q9UDW1	Cytochrome b-c1 complex subunit 9	UQCR10	8.91	9.45	235	39.7	7	2	2	0.849	0.946	0.906	1.178	1.107	1.135	6.121	1.2662	0.05
P62820	Ras-related protein Rab-1A	RAB1A	27.02	5.93	1190	48.3	59	10	4	1.223	1.111	1.131	0.934	0.843	0.878	6.12	0.766234	0.05
Q8N1B4	Vacuolar protein sorting-associated protein 52 homolog	VPS52	88.93	5.7	177	5.4	6	4	4	0.993	1.037	1.138	1.009	0.937	1.006	6.12	0.931818	0.234764
Q9HC35	Echinoderm microtubule-associated protein-like 4	EML4	125.29	5.96	154	6.5	5	5	5	1.039	0.921	1.116	1.078	0.992	0.974	6.12	0.989597	0.879868
Q06210	Glutamine--fructose-6-phosphate aminotransferase [isomerizing] 1	GFPT1	90.1	6.66	338	13.2	19	8	9	1.126	1.142	1.165	0.901	0.896	0.89	6.12	0.782697	0.05
O60888	Protein CutA	CUTA	20.82	5.42	159	18.4	8	2	3	1.121	1.079	1.123	0.901	0.958	0.937	6.119	0.841408	0.05
O14974	Protein phosphatase 1 regulatory subunit 12A	PPP1R12A	135.78	5.31	377	13.2	17	13	13	1.249	1.145	1.129	0.901	0.85	0.845	6.119	0.736872	0.05
Q92841	Probable ATP-dependent RNA helicase DDX17	DDX17	88.24	8.53	908	25.1	46	18	13	1.056	1.104	1.066	0.987	0.946	0.96	6.119	0.896776	0.05
Q9NP72	Ras-related protein Rab-18	RAB18	26.91	5.11	188	22.8	8	3	4	1.041	0.985	0.983	1.06	1.029	1.021	6.119	1.03357	0.220746
Q9UNN5	FAS-associated factor 1	FAF1	80.32	4.81	55	6	4	4	4	1.191	1.174	1.167	0.89	0.84	0.857	6.119	0.732446	0.05
P31323	cAMP-dependent protein kinase type II-beta regulatory subunit	PRKAR2B	51.94	4.82	168	14.1	10	6	4	1.114	1.116	1.092	0.973	0.955	0.868	6.118	0.841662	0.05
O14579	Coatomer subunit epsilon	COPE	38.13	4.97	167	16.6	6	4	4	1.153	1.215	1.173	0.886	0.843	0.848	6.118	0.727761	0.05
Q9Y646	Carboxypeptidase Q	CPQ	57.81	5.79	104	10.8	4	4	5	1.175	1.321	1.175	0.842	0.789	0.816	6.118	0.666576	0.05
P61289	Proteasome activator complex subunit 3	PSME3	34.64	5.69	73	9.8	3	2	3	1.415	1.32	1.22	0.777	0.686	0.699	6.117	0.54665	0.00069157
O14773	Tripeptidyl-peptidase 1	TPP1	63.78	6.01	193	6.7	11	4	4	1.288	1.18	1.181	0.891	0.781	0.796	6.117	0.67635	0.05
P24534	Elongation factor 1-beta	EEF1B2	30.19	4.5	303	27.6	14	4	5	1.192	1.2	1.14	0.864	0.888	0.833	6.117	0.73188	0.05
Q9BQA1	Methylosome protein 50	WDR77	39.73	5.03	124	7.9	4	2	2	1.029	1.007	1.026	1.023	0.941	1.091	6.117	0.997714	0.962243
Q9GZL7	Ribosome biogenesis protein WDR12	WDR12	55.75	5.57	60	4.7	2	2	2	1.486	1.474	1.459	0.569	0.579	0.549	6.116	0.384024	1.70308e-07
Q13451	Peptidyl-prolyl cis-trans isomerase FKBP5	FKBP5	64.07	5.7	120	13.8	6	5	5	1.534	1.467	1.422	0.567	0.563	0.563	6.116	0.382772	9.75784e-06
Q00577	Transcriptional activator protein Pur-alpha	PURA	39.82	6.07	299	28.9	13	6	7	1.021	0.968	1.01	1.075	1.024	1.018	6.116	1.03935	0.180941
P31483	Nucleolysin TIA-1 isoform p40	TIA1	47.86	7.62	133	12.4	6	4	2	1.338	1.306	1.369	0.656	0.716	0.73	6.115	0.523798	2.57163e-05
Q86TX2	Acyl-coenzyme A thioesterase 1	ACOT1	51	6.9	297	14.7	15	7	7	0.859	0.813	0.841	1.245	1.112	1.245	6.115	1.43335	0.05
Q92530	Proteasome inhibitor PI31 subunit	PSMF1	32.03	5.42	58	10.3	3	3	3	1.095	1.21	1.092	0.913	0.949	0.856	6.115	0.800118	0.05
P78406	mRNA export factor	RAE1	47.3	7.96	32	12	3	3	3	1.157	1.11	1.129	0.902	0.927	0.889	6.114	0.800353	0.05
P49458	Signal recognition particle 9 kDa protein	SRP9	12.51	7.77	171	30.2	9	3	3	1.102	0.987	0.946	1.216	0.895	0.967	6.113	1.01417	0.903046
P0C0S5	Histone H2A.Z	H2AFZ	16.98	10.58	228	25.8	18	3	2	1.091	1.049	1.006	0.954	1.007	1.006	6.113	0.943102	0.126318
Q9NP61	ADP-ribosylation factor GTPase-activating protein 3	ARFGAP3	67.49	7.04	49	4.7	3	3	3	1.391	1.344	1.379	0.679	0.634	0.685	6.112	0.485659	5.04921e-06
Q9P2E9	Ribosome-binding protein 1	RRBP1	194.49	8.69	339	11.1	17	13	14	1.316	1.208	1.289	0.803	0.758	0.738	6.112	0.602937	0.000180386
P13051	Uracil-DNA glycosylase	UNG	40.3	9.37	139	8.6	5	3	3	0.735	0.773	0.829	1.302	1.169	1.303	6.111	1.61489	0.000783645
P62258	14-3-3 protein epsilon	YWHAE	33.68	4.63	1839	68.6	94	17	14	1.085	1.089	1.068	0.951	0.964	0.954	6.111	0.884948	0.05
Q9NQ55	Suppressor of SWI4 1 homolog	PPAN	62.15	10.13	55	5.1	4	3	3	1.33	1.26	1.365	0.676	0.758	0.721	6.11	0.54488	0.000103329
P11717	Cation-independent mannose-6-phosphate receptor	IGF2R	314.15	5.64	215	3.6	9	5	7	1.135	1.093	1.113	0.916	0.919	0.934	6.11	0.828794	0.05
Q9UKB3	DnaJ homolog subfamily C member 12	DNAJC12	28.16	5.51	73	12.6	4	3	3	1.494	1.394	1.447	0.6	0.577	0.598	6.11	0.409458	8.85957e-06
Q14137	Ribosome biogenesis protein BOP1	BOP1	90.45	5.8	52	4.7	4	4	4	1.398	1.364	1.365	0.67	0.653	0.66	6.11	0.480494	5.10402e-07
Q92597	Protein NDRG1	NDRG1	46.47	5.49	308	15.5	11	4	4	1.266	1.288	1.249	0.729	0.773	0.805	6.11	0.606626	3.58439e-05
P07099	Epoxide hydrolase 1	EPHX1	60.02	6.77	301	14.3	14	5	5	0.815	0.762	0.793	1.252	1.225	1.263	6.11	1.57806	0.05
Q14696	LDLR chaperone MESD	MESDC2	32.88	7.6	82	7.3	4	2	2	1.151	1.097	1.13	0.895	0.883	0.954	6.11	0.808763	0.05
Q96TC7	Regulator of microtubule dynamics protein 3	RMDN3	57.81	5.02	202	12.3	9	5	5	0.82	0.938	0.959	1.1	1.14	1.153	6.11	1.2488	0.05
Q9Y3A5	Ribosome maturation protein SBDS	SBDS	36.82	8.91	112	20.4	7	6	6	1.264	1.231	1.269	0.807	0.762	0.776	6.109	0.623007	1.20745e-05
P28074	Proteasome subunit beta type-5	PSMB5	30.7	6.43	366	21.7	15	6	6	1.115	1.122	1.13	0.894	0.919	0.929	6.109	0.814375	0.05
Q9Y3E1	Hepatoma-derived growth factor-related protein 3	HDGFRP3	29.31	7.7	100	27.1	6	5	4	0.867	0.784	0.816	1.26	1.199	1.183	6.109	1.47629	0.05
O75381	Peroxisomal membrane protein PEX14	PEX14	45.62	4.89	139	10.3	4	3	3	0.876	0.779	0.861	1.192	1.255	1.145	6.108	1.42766	0.05
P39748	Flap endonuclease 1	FEN1	51.85	8.8	101	8.7	3	3	3	1.03	1.078	1.039	1	0.987	0.974	6.108	0.940896	0.05
Q9HCD5	Nuclear receptor coactivator 5	NCOA5	69.16	9.62	227	19	14	10	11	1.137	1.197	1.197	0.829	0.86	0.888	6.108	0.729822	0.05
P54802	Alpha-N-acetylglucosaminidase	NAGLU	85.65	6.2	55	4.2	3	3	3	1.146	1.261	1.217	0.847	0.802	0.835	6.108	0.68543	0.05
P29762	Cellular retinoic acid-binding protein 1	CRABP1	18.02	5.3	106	19.7	5	3	2	0.627	0.554	0.663	1.39	1.435	1.438	6.107	2.31182	2.25664e-05
P52298	Nuclear cap-binding protein subunit 2	NCBP2	21.14	8.34	61	17.3	5	3	3	1.144	1.14	1.122	0.956	0.86	0.885	6.107	0.793012	0.05
Q9GZZ1	N-alpha-acetyltransferase 50	NAA50	23.51	8.96	163	19.5	5	2	3	1.193	1.095	1.112	0.907	0.922	0.878	6.107	0.796176	0.05
Q9Y678	Coatomer subunit gamma-1	COPG1	111.57	5.32	527	26.7	31	17	15	1.252	1.287	1.184	0.753	0.873	0.758	6.107	0.640344	0.05
Q8WTS6	Histone-lysine N-methyltransferase SETD7	SETD7	44.7	4.5	44	2.7	2	1	1	1.455	1.478	1.438	0.577	0.593	0.566	6.107	0.397163	3.8575e-07
Q13217	DnaJ homolog subfamily C member 3	DNAJC3	69.92	5.83	349	28.6	20	14	15	1.438	1.418	1.376	0.641	0.619	0.615	6.107	0.443053	2.49756e-06
Q96AY3	Peptidyl-prolyl cis-trans isomerase FKBP10	FKBP10	69.3	5.36	275	15.3	13	8	8	1.393	1.309	1.362	0.706	0.657	0.68	6.107	0.502707	1.85089e-05
O43761	Synaptogyrin-3	SYNGR3	25.45	8.42	226	14.8	7	3	3	1.205	1.189	1.224	0.872	0.815	0.802	6.107	0.687949	0.05
P30050	60S ribosomal protein L12	RPL12	21.64	9.48	224	57	15	8	8	1.093	1.168	1.097	0.892	0.962	0.895	6.107	0.818642	0.05
O15397	Importin-8	IPO8	134.01	5.04	78	2.7	3	3	3	1.221	1.218	1.231	0.822	0.811	0.803	6.106	0.66376	0.05
Q8TF09	Dynein light chain roadblock-type 2	DYNLRB2	12.74	6.9	86	12.5	3	1	1	1.04	0.893	1.124	0.982	1.044	1.023	6.106	0.997383	0.972646
Q9NPD3	Exosome complex component RRP41	EXOSC4	27.8	6.07	87	10.6	4	3	3	1.075	1.089	1.059	1	0.939	0.944	6.106	0.894508	0.05
Q9UNX4	WD repeat-containing protein 3	WDR3	125.45	6.2	132	3.4	6	4	4	1.143	1.155	1.151	0.855	0.909	0.893	6.106	0.770368	0.05
Q9Y2S2	Lambda-crystallin homolog	CRYL1	40.03	5.81	139	11.6	8	4	4	1.094	1.117	1.122	0.936	0.91	0.926	6.105	0.831683	0.05
O75694	Nuclear pore complex protein Nup155	NUP155	170.68	5.78	369	10.3	20	11	12	1.109	1.117	1.138	0.928	0.899	0.914	6.105	0.814804	0.05
P14384	Carboxypeptidase M	CPM	57.35	6.94	41	6.3	3	3	3	1.093	1.028	1.123	0.929	0.978	0.954	6.105	0.881936	0.05
Q9Y5P6	Mannose-1-phosphate guanyltransferase beta	GMPPB	43.82	6.16	96	2.8	3	1	1	1.372	1.341	1.339	0.655	0.666	0.731	6.104	0.506417	1.3759e-05
Q13620	Cullin-4B	CUL4B	123.97	7.01	361	16	23	16	10	1.309	1.3	1.298	0.726	0.732	0.739	6.104	0.562324	3.71018e-08
P00734	Prothrombin	F2	78.35	5.64	344	12.5	17	7	7	0.936	0.915	1.081	1.062	1.06	1.05	6.104	1.08186	0.26465
P07686	Beta-hexosaminidase subunit beta	HEXB	70.4	6.29	191	12.6	11	8	8	1.222	1.206	1.244	0.802	0.803	0.827	6.104	0.662309	0.05
P63167	Dynein light chain 1, cytoplasmic	DYNLL1	13.05	6.89	73	7.9	7	1	1	1.088	1.065	1.068	0.985	0.917	0.981	6.104	0.895064	0.05
P46459	Vesicle-fusing ATPase	NSF	96.58	6.52	1136	29	62	21	21	1.309	1.27	1.282	0.746	0.75	0.747	6.104	0.580938	1.27782e-06
Q9BUP3	Oxidoreductase HTATIP2	HTATIP2	32.3	8.58	205	20.2	11	4	5	1.246	1.199	1.182	0.858	0.791	0.827	6.103	0.682658	0.05
O95071	E3 ubiquitin-protein ligase UBR5	UBR5	339.62	5.59	42	1	2	2	3	1.085	1.029	1.06	1.028	0.946	0.955	6.103	0.92281	0.0673353
P16401	Histone H1.5	HIST1H1B	37.69	10.91	267	15	10	3	1	0.952	1.328	1.112	0.765	0.976	0.97	6.103	0.799233	0.166329
Q5TEU4	NADH dehydrogenase [ubiquinone] 1 alpha subcomplex assembly factor 5	NDUFAF5	42.79	6.14	117	6.7	4	2	2	0.839	0.884	0.836	1.212	1.127	1.205	6.103	1.38492	0.05
Q13596	Sorting nexin-1	SNX1	69	5.08	183	11.9	8	6	4	1.034	1.125	1.02	0.926	1.044	0.954	6.103	0.919786	0.154874
P07951	Tropomyosin beta chain	TPM2	42.11	4.66	216	18.7	9	5	2	0.617	0.773	0.754	1.349	1.288	1.321	6.102	1.84608	0.00031748
P02008	Hemoglobin subunit zeta	HBZ	17.98	7.93	263	23.2	23	3	2	1.198	1.133	1.136	0.875	0.868	0.892	6.102	0.760023	0.05
Q13098	COP9 signalosome complex subunit 1	GPS1	62.72	6.3	186	16.3	11	7	7	1.183	1.189	1.129	0.867	0.854	0.88	6.102	0.742931	0.05
Q13405	39S ribosomal protein L49, mitochondrial	MRPL49	21.3	9.47	88	13.3	3	2	2	1.008	1.073	1.094	0.974	0.992	0.961	6.102	0.92189	0.072645
Q14156	Protein EFR3 homolog A	EFR3A	104.78	6.24	88	6.1	6	5	6	0.987	0.956	1.019	1.076	0.998	1.066	6.102	1.06009	0.129693
Q92973	Transportin-1	TNPO1	114.31	4.83	91	5	5	3	4	1.207	1.037	1.091	1.003	0.877	0.887	6.102	0.829685	0.05
P29622	Kallistatin	SERPINA4	55.1	7.33	52	5.6	4	2	2	0.944	1.033	0.966	0.987	1.074	1.098	6.102	1.07339	0.173416
Q9Y3D9	28S ribosomal protein S23, mitochondrial	MRPS23	25.02	8.94	110	18.9	4	3	3	1.04	1.028	1.029	1.009	0.997	0.999	6.102	0.970294	0.05
O15382	Branched-chain-amino-acid aminotransferase, mitochondrial	BCAT2	49.01	8.88	67	9.7	5	4	4	0.944	0.946	0.912	1.063	1.086	1.15	6.101	1.17737	0.05
O95169	NADH dehydrogenase [ubiquinone] 1 beta subcomplex subunit 8, mitochondrial	NDUFB8	23.47	6.3	97	19.9	6	4	4	0.958	0.964	0.964	1.066	1.045	1.104	6.101	1.114	0.05
P62826	GTP-binding nuclear protein Ran	RAN	28.93	7.01	412	27.8	21	6	6	1.076	1.187	1.104	0.915	0.951	0.868	6.101	0.811999	0.05
Q96GQ5	RUS1 family protein C16orf58	C16orf58	56.25	6.47	226	21.8	11	8	10	1.128	1.134	1.111	0.937	0.886	0.905	6.101	0.808776	0.05
Q9GZZ9	Ubiquitin-like modifier-activating enzyme 5	UBA5	50.33	4.79	65	9.4	3	3	4	1.194	1.289	1.236	0.762	0.794	0.826	6.101	0.640495	0.05
Q9UEW8	STE20/SPS1-related proline-alanine-rich protein kinase	STK39	69.34	5.92	106	5.7	6	4	4	1.05	1.025	0.991	1.006	0.996	1.033	6.101	0.989889	0.642675
Q3LXA3	Bifunctional ATP-dependent dihydroxyacetone kinase/FAD-AMP lyase (cyclizing)	DAK	65.9	7.12	196	18.4	10	8	10	1.399	1.309	1.301	0.71	0.664	0.717	6.1	0.521576	5.61639e-05
Q8N257	Histone H2B type 3-B	HIST3H2BB	18.71	10.31	1668	62.7	81	10	1	1.468	1.451	1.381	0.596	0.607	0.596	6.099	0.418372	6.43458e-06
P59780	AP-3 complex subunit sigma-2	AP3S2	24.29	5.11	108	16.1	4	2	3	0.956	0.919	0.987	1.062	1.057	1.118	6.099	1.13103	0.05
Q14232	Translation initiation factor eIF-2B subunit alpha	EIF2B1	40.16	6.9	78	9.5	3	2	3	1.18	1.128	1.134	0.855	0.894	0.908	6.099	0.771935	0.05
Q9NVA2	Septin-11	SEPT11	60.88	6.36	467	25.6	23	11	3	1.1	1.079	1.034	0.945	0.957	0.984	6.099	0.898226	0.05
O43818	U3 small nucleolar RNA-interacting protein 2	RRP9	59.31	7.97	69	9.5	4	4	4	1.228	1.183	1.192	0.815	0.82	0.861	6.099	0.692756	0.05
P22102	Trifunctional purine biosynthetic protein adenosine-3	GART	125	6.26	137	3.9	9	3	4	1.046	1.097	1.086	0.954	0.973	0.943	6.099	0.88882	0.05
Q5H9R7	Serine/threonine-protein phosphatase 6 regulatory subunit 3	PPP6R3	109.12	4.5	150	6	5	4	4	1.105	1.029	1.051	0.964	0.981	0.969	6.099	0.914914	0.0511614
Q14627	Interleukin-13 receptor subunit alpha-2	IL13RA2	50.56	4.84	44	4.7	2	2	2	1.464	1.413	1.404	0.617	0.585	0.615	6.098	0.424434	2.73061e-06
O94819	Kelch repeat and BTB domain-containing protein 11	KBTBD11	68.08	5.78	132	8.7	5	4	4	1.377	1.362	1.438	0.591	0.657	0.673	6.098	0.459899	2.53281e-05
P00352	Retinal dehydrogenase 1	ALDH1A1	64.39	6.3	637	25	45	11	9	1.236	1.209	1.124	0.86	0.898	0.771	6.098	0.708602	0.05
P51531	Probable global transcription activator SNF2L2	SMARCA2	210.44	6.76	165	6.4	11	10	5	1.057	0.896	1.008	1.019	1.052	1.066	6.098	1.05944	0.343439
P52630	Signal transducer and activator of transcription 2	STAT2	109.6	5.34	111	7.4	8	5	4	1.1	1.018	1.05	0.983	0.904	1.043	6.098	0.924874	0.181459
Q6UXD5	Seizure 6-like protein 2	SEZ6L2	102.02	4.8	161	7.7	8	6	5	1.231	1.168	1.222	0.798	0.834	0.845	6.098	0.684065	0.05
Q96HY6	DDRGK domain-containing protein 1	DDRGK1	39.71	5.12	157	14.6	8	4	4	1.091	1.144	1.094	0.904	0.938	0.927	6.098	0.831781	0.05
P14373	Zinc finger protein RFP	TRIM27	64.81	5.83	96	7.4	5	3	3	1.383	1.367	1.326	0.617	0.688	0.716	6.097	0.495829	3.58402e-05
Q96QE5	Transcription elongation factor, mitochondrial	TEFM	47.95	9.39	81	10.8	4	4	4	0.801	0.848	0.87	1.217	1.157	1.204	6.097	1.4204	0.05
Q9UBU9	Nuclear RNA export factor 1	NXF1	79.36	8.74	97	6.6	5	5	5	1.104	1.102	1.147	0.914	0.883	0.947	6.097	0.818372	0.05
P01766	Ig heavy chain V-III region BRO	P01766	14.25	6.45	251	25	7	2	2	1.112	1.177	1.197	0.854	0.842	0.915	6.097	0.748996	0.05
P02753	Retinol-binding protein 4	RBP4	26.09	5.76	53	5.5	3	1	1	1.284	1.069	1.227	0.856	0.805	0.855	6.096	0.702793	0.05
Q14344	Guanine nucleotide-binding protein subunit alpha-13	GNA13	50.32	8.11	119	18.3	10	8	6	1.062	1.01	1.046	0.982	0.971	1.025	6.096	0.955099	0.107473
Q68CQ7	Glycosyltransferase 8 domain-containing protein 1	GLT8D1	47.98	9.37	143	18.1	9	5	5	1.061	1.153	1.089	0.963	0.842	0.988	6.096	0.845595	0.05
Q9UHL4	Dipeptidyl peptidase 2	DPP7	57.05	5.91	277	14.8	13	7	7	1.121	1.168	1.118	0.889	0.905	0.895	6.096	0.789257	0.05
O43819	Protein SCO2 homolog, mitochondrial	SCO2	31.8	9.01	100	9.4	3	2	2	0.833	0.933	0.927	1.116	1.101	1.185	6.095	1.26328	0.05
Q9BRF8	Serine/threonine-protein phosphatase CPPED1	CPPED1	40.68	5.78	96	11.1	5	4	4	1.303	1.268	1.347	0.764	0.682	0.731	6.095	0.555641	6.14902e-05
O96019	Actin-like protein 6A	ACTL6A	52.98	5.39	144	12.6	9	5	4	1.136	1.073	1.109	0.943	0.916	0.918	6.095	0.83695	0.05
P46781	40S ribosomal protein S9	RPS9	27.22	10.66	252	38.7	18	9	8	1.108	1.184	1.059	0.874	1.034	0.836	6.095	0.81886	0.058212
P62495	Eukaryotic peptide chain release factor subunit 1	ETF1	57.94	5.51	72	7.8	3	3	3	1.113	1.271	1.094	0.79	1.014	0.813	6.095	0.752444	0.05
P61960	Ubiquitin-fold modifier 1	UFM1	10.77	9.36	64	68.2	4	4	4	1.297	1.343	1.21	0.693	0.814	0.738	6.095	0.583117	0.00052655
Q9UBW8	COP9 signalosome complex subunit 7a	COPS7A	34.78	8.33	108	13.1	7	4	4	1.19	1.186	1.192	0.815	0.864	0.848	6.095	0.70824	0.05
P07203	Glutathione peroxidase 1	GPX1	23.96	6.15	426	35	23	6	6	0.953	0.881	0.975	1.176	1.023	1.086	6.094	1.16946	0.05
Q8IWJ2	GRIP and coiled-coil domain-containing protein 2	GCC2	240.87	5.1	81	2.7	5	3	4	1.295	1.094	1.137	0.799	0.918	0.851	6.094	0.728304	0.05
Q6P4E1	Protein CASC4	CASC4	56.51	5.54	187	13.2	10	5	5	1.468	1.326	1.386	0.643	0.63	0.641	6.094	0.457895	5.28465e-05
Q9HAV4	Exportin-5	XPO5	153.23	5.56	74	1.4	3	2	2	1.295	1.257	1.26	0.742	0.722	0.818	6.094	0.598636	8.71262e-05
O43719	HIV Tat-specific factor 1	HTATSF1	102.18	4.29	182	11.8	10	8	8	1.237	1.206	1.239	0.797	0.802	0.812	6.093	0.654807	0.05
Q53GD3	Choline transporter-like protein 4	SLC44A4	88.53	8.91	70	2	2	1	1	1.428	1.425	1.362	0.646	0.565	0.667	6.093	0.445552	3.28006e-05
P26640	Valine--tRNA ligase	VARS	154.93	7.53	674	16.2	29	18	19	1.305	1.331	1.304	0.732	0.691	0.73	6.093	0.546447	3.11375e-06
P11908	Ribose-phosphate pyrophosphokinase 2	PRPS2	39.73	6.15	184	16	11	6	1	1.49	1.099	0.826	1.113	0.856	0.709	6.093	0.784187	0.349611
Q6UWE0	E3 ubiquitin-protein ligase LRSAM1	LRSAM1	93.96	5.7	112	5.5	5	4	4	1.145	1.124	1.138	0.926	0.857	0.903	6.093	0.788377	0.05
Q8WW59	SPRY domain-containing protein 4	SPRYD4	25.75	6.44	89	22.2	7	5	5	0.977	0.89	0.97	1.016	1.118	1.122	6.093	1.14769	0.05
Q9BSH5	Haloacid dehalogenase-like hydrolase domain-containing protein 3	HDHD3	29.59	6.21	192	10.4	5	2	2	0.808	0.852	0.868	1.205	1.145	1.215	6.093	1.41021	0.05
Q9NZJ9	Diphosphoinositol polyphosphate phosphohydrolase 2	NUDT4	23.73	6	85	21.1	3	2	2	1.033	0.891	1.064	1.021	1.049	1.035	6.093	1.03916	0.541401
Q96SI9	Spermatid perinuclear RNA-binding protein	STRBP	88.04	8.91	205	11.3	12	8	6	1.369	1.337	1.399	0.689	0.621	0.677	6.092	0.484044	1.37928e-05
P08183	Multidrug resistance protein 1	ABCB1	161.5	9.06	36	2	3	3	3	1.299	1.188	1.169	0.824	0.818	0.794	6.092	0.666302	0.05
P08240	Signal recognition particle receptor subunit alpha	SRPR	83.06	9.07	143	8	7	5	6	1.216	1.212	1.203	0.794	0.811	0.856	6.092	0.677775	0.05
Q99653	Calcineurin B homologous protein 1	CHP1	25.19	4.98	145	28.7	7	5	5	0.993	1.09	1.134	0.952	0.962	0.961	6.092	0.89369	0.110743
P11678	Eosinophil peroxidase	EPX	86.77	10.31	107	4.2	5	3	2	0.703	0.694	0.768	1.282	1.275	1.37	6.092	1.81386	0.000107036
Q5TA45	Integrator complex subunit 11	CPSF3L	78.21	8.27	90	3.5	3	2	2	1.214	1.067	1.146	0.94	0.853	0.872	6.092	0.777648	0.05
Q8NCA5	Protein FAM98A	FAM98A	62.93	9.15	126	2.9	4	2	2	1.286	1.311	1.306	0.695	0.751	0.742	6.091	0.560594	7.21884e-06
P23470	Receptor-type tyrosine-protein phosphatase gamma	PTPRG	180.92	5.99	77	3.1	3	3	3	1.154	1.131	1.066	0.869	0.969	0.902	6.091	0.817666	0.05
Q8WWY3	U4/U6 small nuclear ribonucleoprotein Prp31	PRPF31	65.05	5.63	97	6.4	5	3	3	1.224	1.135	1.113	0.88	0.89	0.849	6.091	0.75432	0.05
P00915	Carbonic anhydrase 1	CA1	33.26	6.59	801	28	32	7	7	1.083	1.159	1.123	0.926	0.869	0.93	6.09	0.809807	0.05
P14314	Glucosidase 2 subunit beta	PRKCSH	68.15	4.33	758	18	34	7	7	1.143	1.149	1.151	0.86	0.889	0.898	6.09	0.768806	0.05
P60900	Proteasome subunit alpha type-6	PSMA6	32.42	6.34	325	28	17	7	7	1.16	1.156	1.148	0.882	0.86	0.884	6.09	0.758083	0.05
Q15435	Protein phosphatase 1 regulatory subunit 7	PPP1R7	47.61	4.84	123	8.9	5	3	3	1.037	1.009	1.04	1	0.992	1.012	6.09	0.973428	0.0907274
Q8N7H5	RNA polymerase II-associated factor 1 homolog	PAF1	68.36	4.53	124	5.6	5	2	2	1.098	1.023	1.079	0.992	1.006	0.891	6.089	0.902813	0.0844688
Q9BQE5	Apolipoprotein L2	APOL2	41.48	6.28	212	14.2	7	5	5	1.337	1.247	1.304	0.752	0.721	0.728	6.089	0.566101	3.58323e-05
P16152	Carbonyl reductase [NADPH] 1	CBR1	34.99	8.55	408	20.6	12	4	5	1.2	1.111	1.167	0.85	0.862	0.899	6.089	0.750719	0.05
Q9NYZ1	Golgi apparatus membrane protein TVP23 homolog B	TVP23B	26.37	8.62	44	3.9	2	1	1	1.356	1.473	1.374	0.668	0.61	0.607	6.088	0.448489	4.86965e-05
Q9Y3T9	Nucleolar complex protein 2 homolog	NOC2L	95.58	5.46	45	2.1	2	2	2	1.356	1.392	1.358	0.63	0.677	0.675	6.088	0.482708	3.28624e-06
O14562	Ubiquitin domain-containing protein UBFD1	UBFD1	40.12	5.55	42	6.8	3	3	3	1.351	1.272	1.375	0.693	0.708	0.689	6.088	0.522761	3.61858e-05
P11117	Lysosomal acid phosphatase	ACP2	51.46	6.28	80	5.9	4	3	3	1.124	1.227	1.126	0.885	0.851	0.875	6.088	0.750935	0.05
Q68EM7	Rho GTPase-activating protein 17	ARHGAP17	107.69	7.23	102	5.2	5	5	5	1.044	1.148	1.114	0.939	0.946	0.897	6.088	0.8415	0.05
Q6ZRP7	Sulfhydryl oxidase 2	QSOX2	86.7	7.64	103	6.4	7	5	5	1.298	1.301	1.284	0.778	0.688	0.739	6.088	0.56786	3.0138e-05
Q96KP4	Cytosolic non-specific dipeptidase	CNDP2	61.67	5.66	503	27.6	25	12	12	1.11	1.077	1.051	0.953	0.936	0.96	6.087	0.879864	0.05
Q03167	Transforming growth factor beta receptor type 3	TGFBR3	104.03	5.45	89	5.6	4	4	4	1.365	1.224	1.281	0.758	0.697	0.762	6.087	0.572868	0.000279253
O75688	Protein phosphatase 1B	PPM1B	58.68	4.95	114	13.2	5	5	5	1.056	1.053	1.05	0.972	0.925	1.031	6.087	0.926876	0.128236
Q99523	Sortilin	SORT1	102.38	5.46	165	6.3	10	4	5	1.206	1.132	1.2	0.864	0.811	0.874	6.087	0.720464	0.05
Q9BQ39	ATP-dependent RNA helicase DDX50	DDX50	96.38	9.26	116	7.1	5	5	3	1.18	1.086	1.16	0.853	0.857	0.951	6.087	0.776708	0.05
Q9NX55	Huntingtin-interacting protein K	HYPK	16.95	4.9	140	19.4	4	2	2	0.997	0.962	0.982	1.015	1.076	1.055	6.087	1.0697	0.05
Q96RQ1	Endoplasmic reticulum-Golgi intermediate compartment protein 2	ERGIC2	47.39	6.27	48	5.3	2	2	2	1.353	1.398	1.374	0.662	0.638	0.661	6.086	0.475394	1.17343e-06
Q13185	Chromobox protein homolog 3	CBX3	26.93	5.23	189	20.8	8	5	5	1.231	1.18	1.19	0.825	0.812	0.848	6.086	0.690086	0.05
Q16630	Cleavage and polyadenylation specificity factor subunit 6	CPSF6	63.24	6.66	206	12.7	14	8	8	1.183	1.181	1.117	0.86	0.874	0.871	6.086	0.748348	0.05
P02461	Collagen alpha-1(III) chain	COL3A1	154.17	6.21	289	5.8	12	7	8	0.737	0.776	0.732	1.287	1.241	1.313	6.086	1.71091	2.99015e-05
Q9UBE0	SUMO-activating enzyme subunit 1	SAE1	45.53	5.17	362	30.9	15	8	8	1.248	1.185	1.121	0.853	0.842	0.837	6.086	0.712437	0.05
Q9Y5L4	Mitochondrial import inner membrane translocase subunit Tim13	TIMM13	12.32	8.42	109	11.6	4	1	1	0.56	0.651	0.578	1.497	1.426	1.373	6.085	2.40134	5.14179e-05
Q5XPI4	E3 ubiquitin-protein ligase RNF123	RNF123	162.1	6.31	72	1.4	3	2	2	1.093	1.176	1.025	0.963	0.924	0.904	6.085	0.847298	0.05
O60763	General vesicular transport factor p115	USO1	122.95	4.85	658	21.1	37	20	20	1.378	1.37	1.359	0.658	0.649	0.67	6.084	0.481373	1.06953e-07
P60880	Synaptosomal-associated protein 25	SNAP25	26.51	4.66	762	58.7	34	12	12	1.247	1.23	1.216	0.801	0.826	0.764	6.084	0.647441	0.05
Q6P996	Pyridoxal-dependent decarboxylase domain-containing protein 1	PDXDC1	97.88	5.25	227	10.5	13	9	9	1.32	1.305	1.283	0.75	0.721	0.705	6.084	0.556807	4.48127e-06
O95394	Phosphoacetylglucosamine mutase	PGM3	68.75	5.84	159	14.8	9	7	8	1.219	1.324	1.297	0.73	0.712	0.802	6.084	0.584375	0.000219496
O43752	Syntaxin-6	STX6	31.96	4.84	111	16.1	4	3	3	0.998	0.934	0.999	1.006	1.091	1.055	6.083	1.0754	0.0885775
O75525	KH domain-containing, RNA-binding, signal transduction-associated protein 3	KHDRBS3	44.51	7.04	89	9.8	7	4	3	1.258	1.104	1.158	0.823	0.885	0.855	6.083	0.728125	0.05
P46060	Ran GTPase-activating protein 1	RANGAP1	73.35	4.63	287	14.3	11	7	7	1.11	1.109	1.156	0.913	0.916	0.879	6.083	0.80237	0.05
Q96JB5	CDK5 regulatory subunit-associated protein 3	CDK5RAP3	63.87	4.68	158	11.1	8	5	5	1.239	1.208	1.247	0.79	0.795	0.804	6.083	0.646724	0.05
Q9NYH9	U3 small nucleolar RNA-associated protein 6 homolog	UTP6	83.15	6.92	105	5	4	3	3	1.147	1.103	1.354	0.846	0.765	0.868	6.083	0.687847	0.05
Q9UQ16	Dynamin-3	DNM3	111.38	8.51	339	19.4	23	17	7	0.969	0.936	1.058	1.038	1.008	1.074	6.083	1.05299	0.292335
P07237	Protein disulfide-isomerase	P4HB	68.48	4.76	1547	40.6	94	21	22	1.305	1.301	1.242	0.75	0.733	0.752	6.083	0.580821	1.44598e-05
Q9NZ43	Vesicle transport protein USE1	USE1	34.51	9.13	150	24.3	5	5	6	0.995	0.992	1.018	1.092	0.959	1.027	6.083	1.02429	0.593961
P37837	Transaldolase	TALDO1	44.79	6.36	457	24.3	28	9	8	1.217	1.207	1.178	0.81	0.859	0.811	6.082	0.688506	0.05
Q8TC71	Mitochondria-eating protein	SPATA18	68.8	8.93	57	1.7	2	1	1	1.423	1.253	1.377	0.699	0.635	0.695	6.082	0.500617	0.000250511
P31937	3-hydroxyisobutyrate dehydrogenase, mitochondrial	HIBADH	40.52	8.38	671	19.6	19	4	4	0.81	0.836	0.841	1.191	1.191	1.213	6.082	1.44552	0.05
P35268	60S ribosomal protein L22	RPL22	19.42	9.21	324	30.5	13	3	3	1.045	1.222	1.06	0.9	1.001	0.854	6.082	0.828073	0.0597257
Q969V3	Nicalin	NCLN	68.15	6.4	390	17.4	15	8	8	1.181	1.147	1.158	0.886	0.851	0.859	6.082	0.744693	0.05
P18621	60S ribosomal protein L17	RPL17	27.57	10.18	76	33.2	7	5	6	0.984	1.299	1.079	0.842	1.044	0.834	6.082	0.809042	0.144728
Q93034	Cullin-5	CUL5	108.88	8.08	144	7.1	7	6	6	1.133	1.13	1.12	0.892	0.887	0.919	6.081	0.797517	0.05
P00738	Haptoglobin	HP	54.11	6.13	534	21.4	32	10	10	1.489	1.415	1.404	0.602	0.588	0.583	6.081	0.41156	6.48089e-06
P80748	Ig lambda chain V-III region LOI	P80748	12.96	4.95	108	22.5	3	2	2	1.279	1.395	1.415	0.715	0.654	0.623	6.081	0.487161	0.000155185
P01857	Ig gamma-1 chain C region	IGHG1	43.24	8.46	2073	24.5	109	7	4	1.241	1.18	1.179	0.859	0.796	0.826	6.081	0.689167	0.05
Q15437	Protein transport protein Sec23B	SEC23B	94.27	6.43	460	19.7	27	14	11	1.165	1.092	1.124	0.878	0.913	0.909	6.081	0.79858	0.05
O60701	UDP-glucose 6-dehydrogenase	UGDH	64.15	6.73	146	15.2	7	6	6	1.251	1.171	1.081	0.82	0.942	0.816	6.081	0.735941	0.05
P21399	Cytoplasmic aconitate hydratase	ACO1	110.31	6.23	774	15.1	35	12	13	1.132	1.179	1.036	0.914	0.997	0.823	6.081	0.816851	0.05
Q9BS92	Protein NipSnap homolog 3B	NIPSNAP3B	32.3	9.32	123	25.9	10	6	3	1.03	1.016	0.95	1.098	0.974	1.012	6.08	1.02937	0.548042
Q96HW7	Integrator complex subunit 4	INTS4	122.36	6	37	3.2	4	3	3	1.089	1.046	1.141	0.928	0.933	0.943	6.08	0.855922	0.05
P49589	Cysteine--tRNA ligase, cytoplasmic	CARS	101.46	6.31	122	9.9	11	8	8	1.163	1.175	1.149	0.876	0.828	0.888	6.079	0.743332	0.05
P51149	Ras-related protein Rab-7a	RAB7A	27.89	6.4	648	49.3	30	9	9	0.972	0.972	1.001	1.063	1.027	1.044	6.079	1.06418	0.05
P46977	Dolichyl-diphosphooligosaccharide--protein glycosyltransferase subunit STT3A	STT3A	87.75	8.28	472	15.6	31	11	11	1.197	1.27	1.125	0.846	0.869	0.772	6.079	0.692372	0.05
Q16822	Phosphoenolpyruvate carboxykinase [GTP], mitochondrial	PCK2	76.98	7.57	210	13.6	12	8	8	0.935	0.879	0.927	1.102	1.126	1.11	6.079	1.2178	0.05
Q8NBJ7	Sulfatase-modifying factor 2	SUMF2	37.14	7.78	283	14.6	8	5	5	0.96	0.936	0.949	1.095	1.003	1.136	6.079	1.13673	0.0767529
P04114	Apolipoprotein B-100	APOB	598.46	6.58	1469	13.3	84	57	60	1.266	1.248	1.254	0.772	0.748	0.79	6.078	0.613057	3.31495e-06
O60476	Mannosyl-oligosaccharide 1,2-alpha-mannosidase IB	MAN1A2	83.5	7.17	48	4.4	3	3	3	1.141	1.157	1.091	0.838	0.962	0.889	6.078	0.793449	0.05
Q70UQ0	Inhibitor of nuclear factor kappa-B kinase-interacting protein	IKBIP	48.57	9.21	193	15.4	10	6	5	1.434	1.366	1.415	0.558	0.633	0.672	6.078	0.441993	3.65361e-05
P29373	Cellular retinoic acid-binding protein 2	CRABP2	19.06	5.42	77	18.1	3	3	2	1.369	1.315	1.39	0.661	0.662	0.681	6.078	0.4919	7.69838e-06
O96005	Cleft lip and palate transmembrane protein 1	CLPTM1	83.38	5.88	298	6	8	4	4	1.085	1.058	1.062	0.975	0.991	0.907	6.078	0.896412	0.05
P63244	Guanine nucleotide-binding protein subunit beta-2-like 1	GNB2L1	39.64	7.6	678	41	44	13	13	1.127	1.209	1.08	0.858	0.996	0.808	6.078	0.779274	0.05
Q96DG6	Carboxymethylenebutenolidase homolog	CMBL	32.96	6.71	92	9	4	3	3	1.334	1.34	1.353	0.69	0.674	0.686	6.077	0.509064	9.46071e-08
O43172	U4/U6 small nuclear ribonucleoprotein Prp4	PRPF4	67.12	7.05	284	11.3	11	5	5	1.1	1.096	1.124	0.92	0.913	0.924	6.077	0.830422	0.05
Q1KMD3	Heterogeneous nuclear ribonucleoprotein U-like protein 2	HNRNPUL2	96.62	4.85	319	23.8	26	15	17	1.111	1.114	1.077	0.92	0.931	0.924	6.077	0.8404	0.05
Q13510	Acid ceramidase	ASAH1	51.27	7.52	412	21	23	10	10	1.316	1.316	1.267	0.735	0.713	0.73	6.077	0.558605	5.32858e-06
O94979	Protein transport protein Sec31A	SEC31A	149.03	6.43	426	11.8	19	12	13	1.129	1.1	1.09	0.923	0.918	0.917	6.077	0.830973	0.05
P35241	Radixin	RDX	84.22	6.03	576	22.6	34	13	9	1.065	1.072	1.099	0.952	0.957	0.932	6.077	0.877936	0.05
Q9Y6U3	Adseverin	SCIN	93.5	5.5	46	2.7	2	2	2	1.386	1.363	1.337	0.654	0.664	0.673	6.077	0.487274	1.33557e-06
Q9UL15	BAG family molecular chaperone regulator 5	BAG5	60.45	5.76	230	19.7	9	7	7	1.026	0.983	1.029	1.024	0.97	1.045	6.077	1.00033	0.990766
Q5JTH9	RRP12-like protein	RRP12	167.26	8.97	117	3.9	7	5	4	1.351	1.366	1.369	0.674	0.642	0.674	6.076	0.487029	5.26765e-07
O15371	Eukaryotic translation initiation factor 3 subunit D	EIF3D	73.73	5.79	102	8	6	4	4	1.024	0.979	1	1.039	1.014	1.02	6.076	1.02331	0.21246
Q8N6T3	ADP-ribosylation factor GTPase-activating protein 1	ARFGAP1	51.17	5.46	49	7.9	3	3	3	1.164	1.164	1.133	0.891	0.86	0.864	6.076	0.755562	0.05
Q96DH6	RNA-binding protein Musashi homolog 2	MSI2	39.47	8.62	221	16.2	10	5	4	1.163	1.129	1.086	0.928	0.865	0.905	6.076	0.798697	0.05
O95834	Echinoderm microtubule-associated protein-like 2	EML2	77.79	5.86	148	12.2	12	7	7	1.275	1.299	1.288	0.732	0.73	0.752	6.076	0.573278	6.24291e-07
O00442	RNA 3~-terminal phosphate cyclase	RTCA	45.33	8.01	61	13.7	5	4	5	1.262	1.164	1.241	0.834	0.826	0.749	6.076	0.65694	0.05
P12004	Proliferating cell nuclear antigen	PCNA	32.99	4.57	61	14.9	5	4	4	1.182	1.144	1.117	0.826	0.884	0.923	6.076	0.76474	0.05
Q6UXG2	UPF0577 protein KIAA1324	KIAA1324	127.51	6.13	379	10.1	20	10	11	1.228	1.186	1.168	0.832	0.827	0.835	6.076	0.696259	0.05
Q8TBA6	Golgin subfamily A member 5	GOLGA5	94.72	5.6	162	13.8	10	9	9	1.235	1.215	1.176	0.849	0.788	0.812	6.075	0.6754	0.05
P26440	Isovaleryl-CoA dehydrogenase, mitochondrial	IVD	52.53	8.45	235	15.4	17	7	7	0.946	0.961	1.016	1.089	1.008	1.055	6.075	1.07834	0.0742692
Q6PCE3	Glucose 1,6-bisphosphate synthase	PGM2L1	83.05	6.81	135	10.1	8	7	7	1.205	1.245	1.204	0.804	0.806	0.811	6.075	0.662562	0.05
Q9HCN4	GPN-loop GTPase 1	GPN1	45.72	4.8	96	4.5	3	2	2	1.006	1.04	1.009	1.032	0.982	1.006	6.075	0.988543	0.556226
P62854	40S ribosomal protein S26	RPS26	16.5	11.01	127	20.9	5	2	2	1.082	1.084	1.017	0.987	0.959	0.946	6.075	0.908577	0.05
Q13190	Syntaxin-5	STX5	45.03	9.21	97	12.4	3	3	4	0.967	1.138	1.12	0.942	0.956	0.952	6.075	0.883721	0.14694
Q96M27	Protein PRRC1	PRRC1	49.71	5.56	135	13.3	8	6	6	1.276	1.212	1.251	0.807	0.761	0.767	6.074	0.624499	3.79138e-05
P55809	Succinyl-CoA:3-ketoacid coenzyme A transferase 1, mitochondrial	OXCT1	65.52	7.14	829	23.3	35	11	12	1.246	1.203	1.214	0.811	0.783	0.817	6.074	0.658204	0.05
Q9H8H3	Methyltransferase-like protein 7A	METTL7A	32.02	8.7	34	4.9	2	1	1	1.406	1.373	1.285	0.703	0.622	0.685	6.074	0.494587	9.66715e-05
Q13740	CD166 antigen	ALCAM	76.52	5.92	373	8.2	16	5	5	1.314	1.25	1.22	0.79	0.741	0.759	6.074	0.60518	9.00286e-05
P39059	Collagen alpha-1(XV) chain	COL15A1	154.35	4.89	141	3.8	10	5	5	0.782	0.821	0.804	1.158	1.238	1.271	6.074	1.52347	0.05
P52272	Heterogeneous nuclear ribonucleoprotein M	HNRNPM	87.14	8.84	2117	48.9	113	36	38	1.255	1.227	1.176	0.813	0.787	0.816	6.074	0.66047	0.05
Q5SWX8	Protein odr-4 homolog	ODR4	59.03	5.62	92	9.9	6	5	5	0.997	0.973	0.994	1.055	1.007	1.048	6.074	1.04926	0.0635059
Q9BV23	Monoacylglycerol lipase ABHD6	ABHD6	43.8	8.67	223	18.4	10	5	5	1.101	1.228	1.132	0.817	0.973	0.823	6.074	0.754984	0.05
P0CG04	Ig lambda-1 chain C regions	IGLC1	13.8	7.89	357	55.7	17	5	2	1.192	1.093	1.23	0.925	0.813	0.82	6.073	0.727738	0.05
P17858	ATP-dependent 6-phosphofructokinase, liver type	PFKL	94.47	7.26	510	16.9	22	12	10	0.999	0.915	0.993	1.045	1.057	1.064	6.073	1.0891	0.080213
Q9UL12	Sarcosine dehydrogenase, mitochondrial	SARDH	109.05	6.8	72	3.2	3	3	3	1.089	1.191	1.051	0.875	1.022	0.845	6.073	0.823176	0.0500622
Q9Y2H6	Fibronectin type-III domain-containing protein 3A	FNDC3A	151.18	6.29	260	7.8	15	9	9	1.204	1.208	1.198	0.818	0.793	0.852	6.073	0.682271	0.05
Q3KQV9	UDP-N-acetylhexosamine pyrophosphorylase-like protein 1	UAP1L1	62.15	5.94	74	8.1	4	3	4	1.03	0.967	1.033	1.064	0.98	0.999	6.073	1.00429	0.902947
Q9Y2Z0	Protein SGT1 homolog	SUGT1	49.08	5.07	177	20.3	11	7	7	1.136	1.178	1.186	0.879	0.832	0.862	6.073	0.735143	0.05
P29372	DNA-3-methyladenine glycosylase	MPG	36.23	9.65	74	9.1	3	2	2	1.167	1.134	1.177	0.8	0.868	0.926	6.072	0.745831	0.05
Q5UCC4	ER membrane protein complex subunit 10	EMC10	28.93	5.78	75	3.1	3	1	1	1.074	1.014	1.038	0.945	0.984	1.017	6.072	0.942418	0.0936861
P07357	Complement component C8 alpha chain	C8A	74.39	6.07	64	4.5	4	3	3	1.287	1.365	1.301	0.691	0.729	0.699	6.072	0.536049	2.13966e-05
Q52LJ0	Protein FAM98B	FAM98B	44.21	5.96	190	9.1	7	2	3	1.157	1.158	1.146	0.853	0.845	0.913	6.072	0.754406	0.05
Q6VY07	Phosphofurin acidic cluster sorting protein 1	PACS1	120.36	7.6	132	4.7	6	4	4	0.977	1.063	1.108	0.935	0.987	1.002	6.072	0.928844	0.18322
Q96NT0	Coiled-coil domain-containing protein 115	CCDC115	22.1	6.45	133	15	4	2	2	0.974	0.938	0.951	1.062	1.11	1.037	6.072	1.12085	0.05
P19827	Inter-alpha-trypsin inhibitor heavy chain H1	ITIH1	112.78	6.31	346	10.1	13	8	8	1.223	1.2	1.167	0.8	0.824	0.857	6.071	0.691086	0.05
P27797	Calreticulin	CALR	58.14	4.29	1007	37.4	57	14	15	1.186	1.181	1.126	0.883	0.825	0.87	6.071	0.738048	0.05
P51991	Heterogeneous nuclear ribonucleoprotein A3	HNRNPA3	44.84	9.1	653	34.1	30	13	11	1.12	1.121	1.149	0.918	0.895	0.868	6.071	0.790855	0.05
Q9BZZ5	Apoptosis inhibitor 5	API5	69.16	6.99	271	16.4	14	7	7	1.103	1.177	1.146	0.93	0.862	0.853	6.071	0.772037	0.05
P14209	CD99 antigen	CD99	21.87	4.58	64	5.4	2	1	1	1.443	1.256	1.262	0.769	0.693	0.648	6.071	0.532694	0.000954488
P06748	Nucleophosmin	NPM1	40.52	4.64	390	20.1	19	5	5	1.302	1.292	1.246	0.792	0.726	0.712	6.07	0.580729	5.81199e-05
P30260	Cell division cycle protein 27 homolog	CDC27	106.64	6.59	86	4.2	3	3	3	1.012	0.998	1.027	0.93	1.058	1.045	6.07	0.998683	0.977098
Q5T8P6	RNA-binding protein 26	RBM26	132.95	9.21	96	5.2	6	5	5	1.048	1.011	1.055	1.04	0.985	0.931	6.07	0.949261	0.231036
Q6DKI1	60S ribosomal protein L7-like 1	RPL7L1	35.63	10.51	75	8.5	3	2	2	1.319	1.119	1.249	0.826	0.755	0.802	6.07	0.646325	0.05
Q8IWZ3	Ankyrin repeat and KH domain-containing protein 1	ANKHD1	299.93	5.46	133	2.4	5	4	5	1.122	1.103	1.074	0.927	0.943	0.901	6.07	0.839952	0.05
P51513	RNA-binding protein Nova-1	NOVA1	58.55	8.93	65	8	6	4	2	1.183	1.153	1.265	0.79	0.862	0.816	6.069	0.685365	0.05
Q5VTE0	Putative elongation factor 1-alpha-like 3	EEF1A1P5	61.72	9.15	2086	57.4	112	20	11	1.142	1.193	1.059	0.901	0.962	0.812	6.069	0.788156	0.05
Q92752	Tenascin-R	TNR	159.6	4.71	86	2.7	5	4	4	1.341	1.371	1.334	0.657	0.68	0.686	6.069	0.5	1.23826e-06
Q6UXH1	Cysteine-rich with EGF-like domain protein 2	CRELD2	44	4.5	68	6.2	2	2	2	1.666	1.411	1.32	0.617	0.514	0.54	6.068	0.380032	0.00109526
Q9ULA0	Aspartyl aminopeptidase	DNPEP	57.84	7.03	161	11.6	7	6	6	0.928	0.878	0.999	1.04	1.116	1.107	6.068	1.16328	0.05
Q96FV9	THO complex subunit 1	THOC1	87.59	4.92	138	7.9	8	4	4	0.976	0.968	0.984	1.04	1.037	1.063	6.068	1.0724	0.05
Q9BW92	Threonine--tRNA ligase, mitochondrial	TARS2	87.11	6.9	64	6.1	5	4	5	1.104	0.933	0.956	1.04	0.917	1.118	6.068	1.0274	0.747921
Q9BZK7	F-box-like/WD repeat-containing protein TBL1XR1	TBL1XR1	61.69	5.28	166	10.3	7	5	3	1.136	1.173	1.126	0.893	0.871	0.869	6.068	0.766521	0.05
P30419	Glycylpeptide N-tetradecanoyltransferase 1	NMT1	66.74	7.66	269	16.7	13	7	7	1.078	1.119	1.034	0.911	1.02	0.906	6.068	0.878056	0.0503218
P98095	Fibulin-2	FBLN2	138.21	4.73	41	1.4	2	2	2	1.27	1.372	1.34	0.706	0.7	0.679	6.067	0.523606	3.50399e-05
P06702	Protein S100-A9	S100A9	16.04	5.71	92	16.7	4	2	2	0.86	0.834	0.826	1.164	1.186	1.197	6.067	1.40754	0.05
P10645	Chromogranin-A	CHGA	58.16	4.58	1653	56	82	21	22	1.264	1.17	1.187	0.832	0.823	0.791	6.067	0.675504	0.05
P61201	COP9 signalosome complex subunit 2	COPS2	61.47	5.36	243	15.1	11	7	7	1.179	1.163	1.151	0.83	0.878	0.866	6.067	0.736902	0.05
P62241	40S ribosomal protein S8	RPS8	31.81	10.32	169	23.1	8	4	4	1.095	1.145	1.079	0.924	0.956	0.868	6.067	0.82796	0.05
Q9HAT2	Sialate O-acetylesterase	SIAE	64.92	6.93	68	4.2	3	2	2	1.266	1.315	1.335	0.697	0.689	0.765	6.067	0.549285	4.92698e-05
P02458	Collagen alpha-1(II) chain	COL2A1	158.37	6.58	312	4.1	10	5	5	0.452	0.372	0.389	1.65	1.556	1.647	6.066	4.00082	6.55007e-06
P31153	S-adenosylmethionine synthase isoform type-2	MAT2A	50.39	6.02	227	23.3	12	8	5	1.162	1.185	1.138	0.858	0.884	0.839	6.066	0.740603	0.05
Q5VZF2	Muscleblind-like protein 2	MBNL2	45.64	8.77	46	4.3	3	2	2	1.237	1.131	1.045	1.003	0.788	0.862	6.066	0.777322	0.05
Q9UDR5	Alpha-aminoadipic semialdehyde synthase, mitochondrial	AASS	115.87	6.18	210	8.7	14	8	8	1.276	1.233	1.248	0.773	0.773	0.763	6.066	0.614586	3.17529e-06
Q9UP83	Conserved oligomeric Golgi complex subunit 5	COG5	102.08	6.15	171	8.8	9	7	7	1.235	1.229	1.222	0.812	0.739	0.829	6.066	0.645686	0.05
Q86YH6	Decaprenyl-diphosphate synthase subunit 2	PDSS2	49.48	8.44	64	7	3	3	3	1.297	1.297	1.323	0.704	0.72	0.725	6.066	0.548634	6.589e-07
Q12907	Vesicular integral-membrane protein VIP36	LMAN2	44.67	6.46	214	19.7	9	7	7	1.193	1.178	1.176	0.838	0.866	0.815	6.066	0.710178	0.05
P05067	Amyloid beta A4 protein	APP	97.54	4.73	189	10.1	11	8	7	1.008	1.107	1.004	0.992	0.972	0.982	6.065	0.944534	0.226667
P62906	60S ribosomal protein L10a	RPL10A	32.32	9.94	224	19.4	11	5	5	1.068	1.088	1.024	0.938	1.023	0.924	6.065	0.907233	0.0655458
Q86XE3	Calcium uptake protein 3, mitochondrial	MICU3	68.98	8.35	111	9.8	6	4	5	0.928	0.912	0.936	1.105	1.089	1.095	6.065	1.1848	0.05
Q9GZM5	Protein YIPF3	YIPF3	40.51	5.47	89	8	3	2	3	1.3	1.302	1.242	0.698	0.752	0.77	6.064	0.577523	5.01113e-05
P04233	HLA class II histocompatibility antigen gamma chain	CD74	38.08	8.72	182	10.5	12	3	3	0.695	0.636	0.744	1.37	1.244	1.375	6.064	1.92241	0.000273542
P22830	Ferrochelatase, mitochondrial	FECH	54.13	8.96	146	9.9	9	4	5	0.783	0.844	0.905	1.189	1.133	1.21	6.064	1.39494	0.05
P62310	U6 snRNA-associated Sm-like protein LSm3	LSM3	12.76	4.58	116	17.6	5	2	2	1.112	1.064	1.068	0.955	0.923	0.942	6.064	0.869297	0.05
Q13332	Receptor-type tyrosine-protein phosphatase S	PTPRS	236.49	6.06	103	2.3	3	3	3	0.996	1.067	0.886	0.998	1.142	0.975	6.064	1.05629	0.497176
Q86X76	Nitrilase homolog 1	NIT1	38.79	7.91	96	5.8	5	2	2	0.898	0.922	0.943	1.097	1.06	1.144	6.064	1.19472	0.05
Q9HAS0	Protein Njmu-R1	C17orf75	50.78	4.98	109	13.1	7	5	6	1.099	1.102	1.089	0.936	0.918	0.92	6.064	0.843161	0.05
P07360	Complement component C8 gamma chain	C8G	23.81	8.49	133	7.4	2	1	1	1.302	1.302	1.296	0.696	0.807	0.66	6.063	0.554615	0.000197535
P19404	NADH dehydrogenase [ubiquinone] flavoprotein 2, mitochondrial	NDUFV2	31.55	8.22	412	30.5	19	7	7	1.003	0.99	1.015	1.021	1.025	1.009	6.063	1.01562	0.155725
P22314	Ubiquitin-like modifier-activating enzyme 1	UBA1	131.23	5.49	1413	24	61	23	23	1.223	1.197	1.185	0.824	0.81	0.824	6.063	0.681831	0.05
Q6U841	Sodium-driven chloride bicarbonate exchanger	SLC4A10	141.73	6.05	92	5.2	7	5	3	0.978	0.861	0.945	1.084	1.074	1.121	6.063	1.1778	0.05
Q02952	A-kinase anchor protein 12	AKAP12	226.08	4.37	427	11	21	13	15	1.193	1.154	1.209	0.826	0.816	0.865	6.063	0.705006	0.05
Q14151	Scaffold attachment factor B2	SAFB2	124.42	5.84	301	14.7	16	12	9	1.032	1.046	1.079	0.963	0.967	0.976	6.063	0.920494	0.05
Q9UMZ2	Synergin gamma	SYNRG	161.93	4.9	79	3	4	4	3	1.052	0.999	0.994	1.019	0.991	1.008	6.063	0.991133	0.68963
O60825	6-phosphofructo-2-kinase/fructose-2,6-bisphosphatase 2	PFKFB2	66.97	8.61	369	19.6	21	9	9	1.452	1.452	1.366	0.619	0.585	0.589	6.063	0.419906	1.1229e-05
P98196	Probable phospholipid-transporting ATPase IH	ATP11A	145.36	6.17	49	2	2	2	3	1.372	1.326	1.267	0.721	0.669	0.707	6.062	0.528878	5.30844e-05
P00439	Phenylalanine-4-hydroxylase	PAH	59.45	6.15	95	7.3	7	3	3	1.251	1.158	1.014	0.899	0.916	0.824	6.062	0.770961	0.05
Q96BQ5	Coiled-coil domain-containing protein 127	CCDC127	35.11	9.26	92	11.5	5	3	4	0.921	0.927	0.982	1.096	1.051	1.085	6.062	1.14205	0.05
Q96GK7	Fumarylacetoacetate hydrolase domain-containing protein 2A	FAHD2A	39.5	8.48	155	23.2	8	5	5	0.894	0.839	0.97	1.099	1.156	1.104	6.062	1.24269	0.05
Q9P2R3	Rabankyrin-5	ANKFY1	142.06	5.7	223	6.2	9	6	8	1.061	1.052	1.092	0.942	0.966	0.949	6.062	0.89142	0.05
O43639	Cytoplasmic protein NCK2	NCK2	49.53	6.49	42	3.9	3	2	2	0.894	0.938	1.011	1.077	1.052	1.09	6.062	1.13225	0.0551814
P34932	Heat shock 70 kDa protein 4	HSPA4	113.92	5.11	1088	32.9	54	25	23	1.171	1.147	1.164	0.866	0.839	0.875	6.062	0.740953	0.05
Q9Y5Q9	General transcription factor 3C polypeptide 3	GTF3C3	113.46	4.98	44	3.2	3	2	2	1.256	1.128	1.071	0.787	0.906	0.914	6.062	0.754559	0.05
O75223	Gamma-glutamylcyclotransferase	GGCT	25.12	5.07	166	20.7	6	4	4	1.021	1.021	1.044	0.962	0.999	1.014	6.061	0.964031	0.123487
P78559	Microtubule-associated protein 1A	MAP1A	355.36	4.85	167	3.2	10	9	9	0.972	1.031	0.989	1.031	1.005	1.033	6.061	1.02574	0.284252
Q15005	Signal peptidase complex subunit 2	SPCS2	30.54	8.69	172	23.5	9	5	5	1.208	1.183	1.165	0.869	0.821	0.815	6.061	0.704443	0.05
Q16881	Thioredoxin reductase 1, cytoplasmic	TXNRD1	82.83	7.16	114	6.9	7	5	5	1.231	1.143	1.11	0.863	0.855	0.859	6.061	0.739667	0.05
Q8NBQ5	Estradiol 17-beta-dehydrogenase 11	HSD17B11	39.67	9.2	289	14.3	12	4	4	1.073	1.128	1.116	0.876	0.926	0.942	6.061	0.827254	0.05
Q99996	A-kinase anchor protein 9	AKAP9	533.41	4.95	899	10.7	53	43	43	1.162	1.124	1.146	0.874	0.873	0.882	6.061	0.766026	0.05
P63220	40S ribosomal protein S21	RPS21	10.82	8.68	111	37.3	6	3	3	1.163	1.132	1.135	0.884	0.871	0.875	6.06	0.766764	0.05
Q05BV3	Echinoderm microtubule-associated protein-like 5	EML5	251.01	7.87	50	0.9	4	2	2	1.12	1.12	1.149	0.958	0.861	0.852	6.06	0.788138	0.05
Q14168	MAGUK p55 subfamily member 2	MPP2	71.07	6.32	309	23.3	19	14	13	1.096	1.07	1.078	0.925	0.93	0.961	6.06	0.868064	0.05
Q86YB7	Enoyl-CoA hydratase domain-containing protein 2, mitochondrial	ECHDC2	33.28	9.03	183	14.4	7	3	3	0.731	0.808	0.827	1.228	1.267	1.199	6.06	1.56128	0.05
P13797	Plastin-3	PLS3	82.97	5.41	656	26.8	42	15	9	1.05	1.226	1.071	0.87	0.993	0.85	6.06	0.810577	0.05
P22059	Oxysterol-binding protein 1	OSBP	103.51	6.9	205	10	16	9	9	1.145	1.107	1.113	0.901	0.901	0.893	6.06	0.800892	0.05
Q9NQP4	Prefoldin subunit 4	PFDN4	18.4	4.42	67	20.1	4	2	2	1.019	0.868	1	1.108	1.055	1.01	6.06	1.09906	0.175697
P13284	Gamma-interferon-inducible lysosomal thiol reductase	IFI30	31.09	4.79	64	4.4	3	1	1	1.161	1.042	1.136	0.849	0.942	0.929	6.059	0.814615	0.05
P0C0L4	Complement C4-A	C4A	212.14	6.65	1070	15.1	60	26	1	1.296	1.243	1.286	0.73	0.745	0.759	6.059	0.584052	8.41722e-06
P13645	Keratin, type I cytoskeletal 10	KRT10	64.52	5.13	374	20.4	23	12	8	1.052	1.082	1.133	0.905	0.954	0.933	6.059	0.854607	0.05
P53618	Coatomer subunit beta	COPB1	124.26	5.72	653	26.3	47	22	22	1.188	1.195	1.177	0.836	0.854	0.809	6.059	0.701966	0.05
Q12981	Vesicle transport protein SEC20	BNIP1	31.33	9.06	158	19.7	7	5	5	1.076	1.049	1.062	0.984	0.952	0.936	6.059	0.901161	0.05
Q13148	TAR DNA-binding protein 43	TARDBP	49.87	5.85	396	15.5	17	7	7	1.16	1.145	1.09	0.9	0.891	0.873	6.059	0.784683	0.05
Q9NT62	Ubiquitin-like-conjugating enzyme ATG3	ATG3	41.57	4.66	82	6.4	3	2	2	0.983	1.057	0.915	1.067	1.003	1.034	6.059	1.05042	0.355778
Q9NY27	Serine/threonine-protein phosphatase 4 regulatory subunit 2	PPP4R2	53.45	4.48	82	6	6	3	3	1.229	1.269	1.175	0.838	0.747	0.801	6.059	0.649605	0.05
Q9UKZ9	Procollagen C-endopeptidase enhancer 2	PCOLCE2	51.81	8.81	91	5.8	6	3	3	1.287	1.004	1.03	0.996	0.858	0.884	6.059	0.82445	0.151715
Q9Y4X5	E3 ubiquitin-protein ligase ARIH1	ARIH1	74.38	4.97	120	5.9	6	3	3	1.167	1.055	1.161	0.901	0.886	0.889	6.059	0.791014	0.05
P04003	C4b-binding protein alpha chain	C4BPA	77.06	7.15	50	5.4	5	3	3	1.292	1.33	1.321	0.693	0.704	0.719	6.059	0.536647	1.54012e-06
Q9H6W3	Bifunctional lysine-specific demethylase and histidyl-hydroxylase NO66	NO66	74.13	6.02	100	7.3	6	4	3	1.313	1.233	1.274	0.799	0.758	0.681	6.058	0.585864	0.00022284
Q7Z3B4	Nucleoporin p54	NUP54	61.93	6.53	168	17.9	9	8	9	1.196	1.154	1.072	0.844	0.892	0.9	6.058	0.77031	0.05
O75379	Vesicle-associated membrane protein 4	VAMP4	19.19	6.75	87	18.4	3	2	2	1.263	1.255	1.366	0.748	0.712	0.714	6.058	0.559732	0.000110404
P04843	Dolichyl-diphosphooligosaccharide--protein glycosyltransferase subunit 1	RPN1	78.04	5.96	749	29.2	47	18	20	1.226	1.2	1.162	0.827	0.821	0.822	6.058	0.688406	0.05
P18085	ADP-ribosylation factor 4	ARF4	23.36	6.59	764	55	30	8	4	1.262	1.202	1.196	0.831	0.798	0.769	6.058	0.655191	0.05
P61586	Transforming protein RhoA	RHOA	26.22	5.83	127	28.5	9	4	5	1.051	1.223	1.076	0.891	0.966	0.851	6.058	0.808358	0.05
P63104	14-3-3 protein zeta/delta	YWHAZ	32.71	4.73	799	65.7	53	17	10	1.078	1.08	1.041	0.951	0.975	0.933	6.058	0.893717	0.05
P68871	Hemoglobin subunit beta	HBB	18.85	6.75	15927	61.9	825	8	5	1.116	1.064	1.078	0.962	0.899	0.939	6.058	0.859423	0.05
Q96EK7	Constitutive coactivator of peroxisome proliferator-activated receptor gamma	FAM120B	115.62	5.49	137	7.3	7	6	6	0.921	0.965	0.937	1.066	1.035	1.134	6.058	1.14594	0.05
Q9Y5X1	Sorting nexin-9	SNX9	77.26	5.4	50	7.2	4	4	4	0.94	0.777	0.912	1.134	1.144	1.151	6.058	1.3043	0.05
Q9NUY8	TBC1 domain family member 23	TBC1D23	89.44	5.23	58	1.9	2	2	2	1.368	1.326	1.238	0.775	0.674	0.676	6.057	0.540437	0.000289237
P12429	Annexin A3	ANXA3	42.71	5.63	443	37.5	21	11	12	1.297	1.29	1.285	0.718	0.714	0.753	6.057	0.564308	1.63889e-06
O60524	Nuclear export mediator factor NEMF	NEMF	151.06	5.97	155	4.6	8	5	5	0.96	1.038	1.013	1.054	1.008	0.984	6.057	1.01162	0.724586
P05455	Lupus La protein	SSB	61.19	6.68	282	24.3	18	10	11	1.197	1.146	1.174	0.848	0.836	0.856	6.057	0.722206	0.05
P47755	F-actin-capping protein subunit alpha-2	CAPZA2	38.2	5.57	130	32.9	9	7	4	1.008	1.083	0.967	0.97	1.024	1.005	6.057	0.980706	0.637969
Q13586	Stromal interaction molecule 1	STIM1	89.58	6.19	57	6.4	5	4	5	0.934	1.013	0.908	1.01	1.125	1.067	6.057	1.12154	0.0651841
Q8TDD1	ATP-dependent RNA helicase DDX54	DDX54	114.86	10.03	127	4.2	6	3	3	1.026	1.087	1.095	0.993	0.893	0.963	6.057	0.888092	0.05
Q9Y3F4	Serine-threonine kinase receptor-associated protein	STRAP	44.94	4.98	239	15.1	7	4	4	1.155	1.106	1.134	0.893	0.874	0.895	6.057	0.784094	0.05
Q9Y3A6	Transmembrane emp24 domain-containing protein 5	TMED5	29.54	4.71	115	11.8	4	2	3	1.315	1.277	1.245	0.752	0.745	0.723	6.057	0.578577	1.65824e-05
O60749	Sorting nexin-2	SNX2	68.17	5.04	339	22.4	19	11	10	1.053	0.999	1.041	1.008	0.996	0.96	6.057	0.958293	0.121169
Q92797	Symplekin	SYMPK	161.39	5.82	142	3.5	5	4	4	1.062	1.121	1.109	0.934	0.941	0.89	6.057	0.839915	0.05
O15027	Protein transport protein Sec16A	SEC16A	249.06	5.4	121	3.7	7	7	7	1.074	1.089	1.118	0.949	0.931	0.895	6.056	0.845779	0.05
O14744	Protein arginine N-methyltransferase 5	PRMT5	80.2	5.88	139	7.5	7	5	6	1.157	1.088	1.133	0.909	0.881	0.888	6.056	0.792777	0.05
O43291	Kunitz-type protease inhibitor 2	SPINT2	31.01	8.68	120	12.3	4	3	3	1.166	1.216	1.151	0.844	0.836	0.843	6.056	0.714124	0.05
Q9Y3Q0	N-acetylated-alpha-linked acidic dipeptidase 2	NAALAD2	95.86	8.56	114	5.7	5	4	4	1.076	1.09	1.075	0.941	0.909	0.965	6.056	0.868559	0.05
O60645	Exocyst complex component 3	EXOC3	99.45	5.8	219	11	11	7	7	0.984	1.001	1.002	1.017	1.021	1.031	6.056	1.02745	0.05
P61088	Ubiquitin-conjugating enzyme E2 N	UBE2N	19.48	6.13	234	38.2	12	6	6	1.116	1.144	1.063	0.877	1.01	0.846	6.056	0.82245	0.05
Q8IVL6	Prolyl 3-hydroxylase 3	LEPREL2	86.71	5.93	50	2.2	2	2	2	1.28	1.209	1.279	0.722	0.782	0.783	6.055	0.606953	9.05408e-05
O43592	Exportin-T	XPOT	123.29	5.24	78	3.6	5	4	2	1.282	1.124	1.22	0.841	0.766	0.822	6.055	0.669884	0.05
O94811	Tubulin polymerization-promoting protein	TPPP	30.04	9.48	81	14.2	5	3	3	1.115	1.037	1.133	0.919	0.957	0.894	6.055	0.843227	0.05
Q9Y224	UPF0568 protein C14orf166	C14orf166	32.75	6.19	160	13.9	10	4	4	1.191	1.237	1.108	0.818	0.844	0.857	6.055	0.712387	0.05
Q9Y4P3	Transducin beta-like protein 2	TBL2	57.96	9.52	63	8.3	4	3	3	1.34	1.283	1.391	0.691	0.713	0.637	6.055	0.50847	6.89317e-05
P14625	Endoplasmin	HSP90B1	110.8	4.76	2925	39	170	30	32	1.186	1.226	1.134	0.858	0.843	0.808	6.055	0.707558	0.05
Q8TBC4	NEDD8-activating enzyme E1 catalytic subunit	UBA3	57.77	5.3	69	4.5	3	2	2	1.16	1.18	1.141	0.83	0.877	0.867	6.055	0.739443	0.05
Q9BUF5	Tubulin beta-6 chain	TUBB6	53.72	4.77	891	27.8	44	10	3	1.086	1.162	1.029	0.946	1.029	0.803	6.055	0.847727	0.11156
Q9GZP4	PITH domain-containing protein 1	PITHD1	26.45	5.47	232	27.5	16	7	6	1.112	1.059	1.077	0.947	0.954	0.906	6.055	0.864224	0.05
O00161	Synaptosomal-associated protein 23	SNAP23	27.35	4.89	207	28	8	4	4	0.933	0.86	0.879	1.143	1.129	1.11	6.054	1.26572	0.05
P49755	Transmembrane emp24 domain-containing protein 10	TMED10	29.26	6.97	309	29.7	20	6	6	1.248	1.325	1.195	0.793	0.759	0.734	6.054	0.606688	0.000283477
Q92572	AP-3 complex subunit sigma-1	AP3S1	24.93	5.23	88	22.3	5	4	4	1.325	1.25	1.176	0.778	0.743	0.782	6.054	0.61397	0.000419436
Q15269	Periodic tryptophan protein 2 homolog	PWP2	114.59	5.76	106	3.6	5	3	3	1.278	1.22	1.247	0.739	0.751	0.819	6.054	0.616555	9.04438e-05
P04844	Dolichyl-diphosphooligosaccharide--protein glycosyltransferase subunit 2	RPN2	76.23	5.44	412	15.8	20	8	8	1.205	1.167	1.109	0.844	0.858	0.871	6.054	0.739155	0.05
Q8IV36	Protein HID1	HID1	96.65	5.69	53	2	3	2	2	1.188	1.25	1.184	0.865	0.779	0.788	6.054	0.671452	0.05
Q96AC1	Fermitin family homolog 2	FERMT2	93.1	6.26	123	12.1	10	6	7	0.978	1.031	1.001	0.974	1.069	1.001	6.054	1.0113	0.747238
Q9ULR3	Protein phosphatase 1H	PPM1H	62.88	6.14	79	6.4	3	3	3	1.143	1.159	1.173	0.825	0.87	0.884	6.054	0.742158	0.05
Q9UPN7	Serine/threonine-protein phosphatase 6 regulatory subunit 1	PPP6R1	103.02	4.45	106	5.8	5	4	4	1.064	1.116	1.095	0.984	0.858	0.937	6.054	0.84855	0.05
O75608	Acyl-protein thioesterase 1	LYPLA1	27.75	6.29	208	14.8	11	4	4	1.205	1.154	1.12	0.886	0.825	0.863	6.053	0.739868	0.05
P13861	cAMP-dependent protein kinase type II-alpha regulatory subunit	PRKAR2A	51.1	4.96	402	27.2	23	11	9	1.091	1.088	1.096	0.917	0.932	0.929	6.053	0.848244	0.05
Q13057	Bifunctional coenzyme A synthase	COASY	67.9	6.51	149	10.8	7	6	5	0.889	0.989	0.987	1.059	1.051	1.078	6.053	1.11274	0.0750876
Q9H0Q0	Protein FAM49A	FAM49A	41.81	5.71	78	10.8	3	3	2	1.309	1.356	1.327	0.687	0.67	0.704	6.053	0.516283	2.8021e-06
Q96EC8	Protein YIPF6	YIPF6	28.07	5.46	65	5.1	2	1	1	1.317	1.292	1.326	0.672	0.702	0.744	6.053	0.538247	1.28489e-05
Q6RFH5	WD repeat-containing protein 74	WDR74	47.57	8.64	67	6.8	2	2	2	1.264	1.256	1.32	0.758	0.697	0.758	6.053	0.576302	4.56458e-05
P42892	Endothelin-converting enzyme 1	ECE1	97.3	5.61	81	3.9	5	3	2	0.994	0.918	1.005	1.045	1.038	1.053	6.053	1.07508	0.112974
Q12906	Interleukin enhancer-binding factor 3	ILF3	110.8	8.86	788	18.2	50	17	15	1.072	1.005	1.051	0.984	0.976	0.965	6.053	0.935102	0.0666496
Q13492	Phosphatidylinositol-binding clathrin assembly protein	PICALM	80.28	7.7	137	8	7	4	4	1.097	1.018	1.047	0.931	0.973	0.987	6.053	0.914295	0.05
Q6NUQ4	Transmembrane protein 214	TMEM214	87.58	9.28	167	6.1	11	5	5	1.202	1.156	1.232	0.812	0.809	0.842	6.053	0.686072	0.05
Q9H0W9	Ester hydrolase C11orf54	C11orf54	41.34	6.23	34	4.4	3	2	2	1.178	1.159	1.165	0.86	0.841	0.85	6.053	0.728441	0.05
P30046	D-dopachrome decarboxylase	DDT	13.96	6.71	123	30.5	7	4	4	1.107	1.036	1.032	1.018	0.965	0.895	6.053	0.906457	0.0921923
Q02252	Methylmalonate-semialdehyde dehydrogenase [acylating], mitochondrial	ALDH6A1	66.28	8.72	628	29.3	32	14	14	1.158	1.101	1.123	0.895	0.888	0.888	6.053	0.789769	0.05
Q14498	RNA-binding protein 39	RBM39	68.11	10.1	274	13	10	6	6	1.091	1.086	1.07	0.928	0.919	0.959	6.053	0.864182	0.05
Q96A33	Coiled-coil domain-containing protein 47	CCDC47	65.75	4.76	236	11	12	5	5	1.05	1.034	0.985	1.024	1.004	0.956	6.053	0.972304	0.370358
O15530	3-phosphoinositide-dependent protein kinase 1	PDPK1	72.56	6.95	32	4.3	3	3	3	0.888	1.03	0.959	1.009	1.022	1.144	6.052	1.10358	0.169985
P02792	Ferritin light chain	FTL	23.04	5.51	261	42.3	16	6	7	1.257	1.188	1.239	0.764	0.799	0.805	6.052	0.64278	0.05
P13798	Acylamino-acid-releasing enzyme	APEH	88.79	5.29	281	14.5	16	9	9	1.034	1.062	1.106	0.957	0.932	0.961	6.052	0.890069	0.05
P30043	Flavin reductase (NADPH)	BLVRB	24.51	7.13	795	34.5	31	5	6	1.153	1.1	1.068	0.977	0.854	0.9	6.052	0.822343	0.05
P49821	NADH dehydrogenase [ubiquinone] flavoprotein 1, mitochondrial	NDUFV1	57.43	8.51	427	25.4	30	13	13	1.052	1.044	1.049	0.976	0.968	0.963	6.052	0.924324	0.05
P61158	Actin-related protein 3	ACTR3	53.3	5.61	773	44.3	41	14	11	1.029	1.004	1.034	1.018	0.982	0.985	6.052	0.973264	0.141812
Q13228	Selenium-binding protein 1	SELENBP1	59.57	5.93	389	19.3	17	8	8	1.085	1.09	1.059	0.958	0.923	0.937	6.052	0.871367	0.05
Q15738	Sterol-4-alpha-carboxylate 3-dehydrogenase, decarboxylating	NSDHL	46.97	8.16	96	13.1	6	4	4	0.949	0.919	0.944	1.08	1.058	1.102	6.052	1.1522	0.05
Q96CS3	FAS-associated factor 2	FAF2	57.06	5.46	227	21.1	14	8	7	1.005	0.996	0.98	1.057	0.95	1.064	6.052	1.03019	0.503366
Q9H2H8	Peptidyl-prolyl cis-trans isomerase-like 3	PPIL3	21.35	6.29	131	26.7	5	4	4	1.158	1.173	1.163	0.852	0.857	0.849	6.052	0.732112	0.05
Q9H8Y8	Golgi reassembly-stacking protein 2	GORASP2	50.73	4.73	61	11.9	6	4	3	1.386	1.225	1.479	0.715	0.583	0.664	6.052	0.479707	0.00105569
Q8IU81	Interferon regulatory factor 2-binding protein 1	IRF2BP1	67.83	8.52	34	4.6	2	1	3	1.364	1.176	1.333	0.726	0.741	0.712	6.052	0.562613	0.000656886
O76070	Gamma-synuclein	SNCG	16.99	4.89	140	43.3	6	4	4	1.282	1.226	1.255	0.661	0.729	0.899	6.052	0.608291	0.00248705
P34949	Mannose-6-phosphate isomerase	MPI	53.15	5.62	79	5.9	3	2	2	1.082	1.048	1.083	0.981	0.928	0.93	6.052	0.883598	0.05
Q16799	Reticulon-1	RTN1	93.02	4.62	745	18.6	29	11	11	0.95	0.941	0.967	1.084	1.023	1.087	6.052	1.11756	0.05
O15121	Sphingolipid delta(4)-desaturase DES1	DEGS1	41.91	6.97	90	6.5	3	2	2	0.963		1.255	1.238	1.277	1.318	6.051	1.15209	0.450976
O15126	Secretory carrier-associated membrane protein 1	SCAMP1	41.73	7.03	426	19.2	14	5	5	1.187	1.169	1.129	0.861	0.85	0.855	6.051	0.736298	0.05
P09497	Clathrin light chain B	CLTB	29.18	4.57	135	11.8	9	3	3	0.998	1.05	1.005	0.923	1.107	0.968	6.051	0.981985	0.776904
P13521	Secretogranin-2	SCG2	80.75	4.67	637	29	29	17	17	1.107	1.131	1.113	0.907	0.896	0.897	6.051	0.80573	0.05
P25686	DnaJ homolog subfamily B member 2	DNAJB2	39.57	5.69	238	24.4	12	9	9	1.043	1.066	1.058	0.961	0.932	0.991	6.051	0.910641	0.05
Q13595	Transformer-2 protein homolog alpha	TRA2A	34.33	11.27	621	24.5	16	6	5	1.147	1.151	1.149	0.902	0.843	0.859	6.051	0.75544	0.05
Q16623	Syntaxin-1A	STX1A	38.67	5.14	223	33	14	9	8	1.24	1.245	1.129	0.825	0.827	0.785	6.051	0.674322	0.05
Q86X29	Lipolysis-stimulated lipoprotein receptor	LSR	75.74	8.29	103	6.5	3	3	3	1.199	1.114	1.186	0.85	0.809	0.893	6.051	0.729351	0.05
Q92777	Synapsin-2	SYN2	70.43	8.58	241	7.7	8	4	2	0.906	0.975	0.947	1.068	1.082	1.073	6.051	1.13967	0.05
Q86V81	THO complex subunit 4	ALYREF	29.62	11.15	219	24.9	8	5	5	1.111	1.147	1.154	0.853	0.864	0.922	6.051	0.773447	0.05
Q9UN86	Ras GTPase-activating protein-binding protein 2	G3BP2	59.42	5.41	84	11.6	7	5	4	1.105	1.019	1.127	0.906	0.975	0.919	6.051	0.861273	0.05
Q9BVG4	Protein PBDC1	PBDC1	31.43	4.72	84	7.7	3	1	2	1.077	1.061	1.123	0.973	0.892	0.924	6.05	0.855259	0.05
Q9BYT8	Neurolysin, mitochondrial	NLN	92.8	6.21	108	5.8	5	4	4	1.392	1.193	1.385	0.684	0.694	0.702	6.05	0.523929	0.000649634
A6NHL2	Tubulin alpha chain-like 3	TUBAL3	54.57	5.68	567	8.7	21	4	1	1	1.018	1.043	0.984	1.015	0.99	6.05	0.976478	0.205314
P00450	Ceruloplasmin	CP	138.34	5.44	271	11.2	15	9	10	1.22	1.155	1.097	0.875	0.835	0.868	6.05	0.742512	0.05
P54577	Tyrosine--tRNA ligase, cytoplasmic	YARS	73.66	6.61	346	29.2	21	14	16	1.094	1.129	1.148	0.864	0.91	0.905	6.05	0.79472	0.05
P54920	Alpha-soluble NSF attachment protein	NAPA	39.85	5.23	606	28.8	26	7	5	1.077	1.084	1.075	0.955	0.921	0.938	6.05	0.869592	0.05
P60510	Serine/threonine-protein phosphatase 4 catalytic subunit	PPP4C	38.61	4.91	81	7.8	3	2	2	1.082	1.136	1.075	0.963	0.869	0.925	6.05	0.83723	0.05
Q4J6C6	Prolyl endopeptidase-like	PREPL	99.51	5.96	70	3.4	4	2	3	1.18	1.124	1.117	0.877	0.898	0.854	6.05	0.768489	0.05
Q9Y3E5	Peptidyl-tRNA hydrolase 2, mitochondrial	PTRH2	23.13	8.95	76	30.7	4	4	4	1.111	1.117	1.119	0.933	0.86	0.91	6.05	0.807589	0.05
P15121	Aldose reductase	AKR1B1	42.19	6.51	380	24.1	22	9	8	1.134	1.156	1.144	0.856	0.891	0.868	6.049	0.761503	0.05
Q9Y6A1	Protein O-mannosyl-transferase 1	POMT1	89.81	8.69	50	3.7	3	3	3	0.913	0.98	1.07	1.052	1.027	1.007	6.049	1.04151	0.466253
Q15102	Platelet-activating factor acetylhydrolase IB subunit gamma	PAFAH1B3	27.44	6.33	196	28.1	6	5	6	1.011	1.074	1.041	0.982	0.98	0.961	6.049	0.935061	0.0516619
Q92769	Histone deacetylase 2	HDAC2	65.3	5.59	178	14.3	10	5	5	1.136	1.116	1.099	0.897	0.922	0.879	6.049	0.805133	0.05
Q9H1I8	Activating signal cointegrator 1 complex subunit 2	ASCC2	96.9	5.02	58	3.8	5	3	2	1.088	1.141	1.119	0.961	0.882	0.858	6.049	0.80675	0.05
Q13330	Metastasis-associated protein MTA1	MTA1	92.19	9.34	121	4.5	6	3	3	1.009	1.107	1.039	0.962	0.986	0.946	6.049	0.917274	0.0798662
P01700	Ig lambda chain V-I region HA	P01700	12.92	9.07	53	11.6	2	1	1	1.303	1.27	1.215	0.761	0.727	0.772	6.048	0.596621	6.18948e-05
Q8N128	Protein FAM177A1	FAM177A1	27.24	4.39	59	4.7	2	1	1	1.311	1.198	1.205	0.755	0.796	0.783	6.048	0.628433	0.05
Q99719	Septin-5	SEPT5	50.54	6.21	183	20.1	14	9	7	1.081	0.999	0.995	0.998	1.006	0.969	6.048	0.966829	0.352409
Q99598	Translin-associated protein X	TSNAX	38.48	6.1	38	9	2	2	3	1.231	1.24	1.255	0.757	0.775	0.79	6.048	0.623188	2.44104e-06
P06576	ATP synthase subunit beta, mitochondrial	ATP5B	62.02	5.26	6260	62	260	22	23	0.917	0.932	0.938	1.087	1.083	1.091	6.048	1.17008	0.05
P23378	Glycine dehydrogenase (decarboxylating), mitochondrial	GLDC	125.25	6.68	117	6.8	5	5	5	1.358	1.202	0.971	0.954	0.813	0.75	6.048	0.712829	0.0753517
Q14746	Conserved oligomeric Golgi complex subunit 2	COG2	96.1	6.2	73	4.6	3	3	4	1.267	1.228	1.202	0.792	0.731	0.828	6.048	0.635921	0.05
Q15274	Nicotinate-nucleotide pyrophosphorylase [carboxylating]	QPRT	34.15	5.81	70	10.4	4	3	3	1.07	0.975	1.083	1.006	0.944	0.97	6.048	0.933504	0.168438
Q6KCM7	Calcium-binding mitochondrial carrier protein SCaMC-2	SLC25A25	59.39	8.54	485	12.6	17	6	5	0.873	0.858	0.872	1.145	1.137	1.163	6.048	1.32347	0.05
Q8IUR7	Armadillo repeat-containing protein 8	ARMC8	85.77	6.28	95	9.2	5	5	6	1.069	0.975	0.978	1.032	1.004	0.99	6.048	1.00132	0.970842
Q8NHP8	Putative phospholipase B-like 2	PLBD2	70.93	6.34	51	2.9	2	2	2	1.195	1.181	1.283	0.756	0.849	0.784	6.048	0.652911	0.05
Q9UH62	Armadillo repeat-containing X-linked protein 3	ARMCX3	49	8.6	89	6.6	4	2	2	1.038	1.062	1.143	0.868	0.97	0.967	6.048	0.86494	0.05
Q9Y3C4	EKC/KEOPS complex subunit TPRKB	TPRKB	23.43	6.31	66	6.9	3	1	1	1.195	1.175	1.105	0.92	0.855	0.798	6.048	0.740432	0.05
O00233	26S proteasome non-ATPase regulatory subunit 9	PSMD9	28.05	6.46	87	17.9	4	4	5	0.995	1.027	1.02	1.005	1.012	0.989	6.048	0.988166	0.375013
P10619	Lysosomal protective protein	CTSA	59.99	6.16	69	7.3	3	3	3	1.018	1.058	1.09	0.972	0.916	0.993	6.047	0.909981	0.05
P53367	Arfaptin-1	ARFIP1	48.87	6.24	311	24.9	15	9	9	1.052	1.018	1.045	1.014	0.956	0.962	6.047	0.941252	0.0595473
Q9Y5J1	U3 small nucleolar RNA-associated protein 18 homolog	UTP18	72.5	8.93	93	2	2	1	1	1.278	1.235	1.274	0.805	0.702	0.753	6.047	0.596778	9.99911e-05
P02765	Alpha-2-HS-glycoprotein	AHSG	43.99	5.43	133	9.5	8	5	5	1.22	1.218	1.188	0.82	0.8	0.801	6.047	0.667678	0.05
P11021	78 kDa glucose-regulated protein	HSPA5	86.61	5.07	6171	52.6	278	36	34	1.154	1.213	1.16	0.835	0.853	0.832	6.047	0.714488	0.05
P39656	Dolichyl-diphosphooligosaccharide--protein glycosyltransferase 48 kDa subunit	DDOST	55.98	6.09	238	14.5	23	8	8	1.177	1.266	1.078	0.842	0.909	0.775	6.047	0.71741	0.05
Q96A72	Protein mago nashi homolog 2	MAGOHB	20.53	5.95	96	28.4	8	5	5	1.079	1.093	1.051	0.954	0.919	0.951	6.047	0.876202	0.05
O60610	Protein diaphanous homolog 1	DIAPH1	166.23	5.31	153	8.4	15	11	13	1.318	1.219	1.255	0.776	0.733	0.746	6.047	0.594673	8.47671e-05
P17612	cAMP-dependent protein kinase catalytic subunit alpha	PRKACA	48.93	8.84	113	19.4	9	6	3	1.095	1.012	1.042	0.964	0.975	0.959	6.047	0.920292	0.0698063
Q8WWH5	Probable tRNA pseudouridine synthase 1	TRUB1	44.62	8.44	43	9.2	3	3	3	0.913	1.075	1.099	0.991	1.005	0.964	6.047	0.95886	0.546352
Q5T6V5	UPF0553 protein C9orf64	C9orf64	44.04	5.61	70	7.9	3	3	3	1.157	1.123	1.128	0.876	0.871	0.891	6.046	0.774061	0.05
P08621	U1 small nuclear ribonucleoprotein 70 kDa	SNRNP70	56.85	9.94	396	26.5	22	12	13	0.993	0.982	0.967	1.018	1.016	1.07	6.046	1.05506	0.0758396
P28070	Proteasome subunit beta type-4	PSMB4	30.62	5.72	39	3.8	3	1	1	1.077	1.053	1.065	0.983	0.934	0.934	6.046	0.892332	0.05
Q13825	Methylglutaconyl-CoA hydratase, mitochondrial	AUH	41.37	9.53	149	19.5	9	5	8	0.92	0.879	0.885	1.101	1.13	1.131	6.046	1.25261	0.05
Q15382	GTP-binding protein Rheb	RHEB	23.98	5.65	58	14.1	3	3	3	1.049	1.023	0.959	1.061	0.94	1.014	6.046	0.994721	0.910215
Q5VW32	BRO1 domain-containing protein BROX	BROX	55.67	7.55	60	5.4	3	3	3	1.098	1.077	1.15	0.89	0.915	0.916	6.046	0.818346	0.05
Q7L014	Probable ATP-dependent RNA helicase DDX46	DDX46	142.09	9.33	533	20.2	27	19	20	1.054	1.03	1.044	0.99	0.938	0.99	6.046	0.932864	0.05
Q8NB37	Parkinson disease 7 domain-containing protein 1	PDDC1	25.4	6.14	53	12.7	3	2	3	1.096	1.049	1.129	0.878	0.936	0.958	6.046	0.846671	0.05
Q8ND56	Protein LSM14 homolog A	LSM14A	56.23	9.55	75	10.6	4	4	4	1.003	0.988	1.067	0.942	1.057	0.989	6.046	0.977109	0.604534
Q9UKF6	Cleavage and polyadenylation specificity factor subunit 3	CPSF3	87.97	5.37	105	7.5	5	4	4	1.114	1.118	1.092	0.926	0.897	0.899	6.046	0.818893	0.05
Q6NXG1	Epithelial splicing regulatory protein 1	ESRP1	84.47	6.24	109	7.2	7	5	5	1.177	1.153	1.164	0.832	0.827	0.893	6.046	0.730395	0.05
Q9BZE1	39S ribosomal protein L37, mitochondrial	MRPL37	53.87	8.83	136	7.6	5	3	3	1.059	1.014	1.045	0.976	0.929	1.023	6.046	0.939064	0.129926
Q9NRW1	Ras-related protein Rab-6B	RAB6B	27	5.41	379	35.1	19	7	3	0.964	0.869	0.874	1.103	1.134	1.102	6.046	1.23347	0.05
P68371	Tubulin beta-4B chain	TUBB4B	53.92	4.79	3134	64.3	160	21	1	1.064	1.161	1.033	0.969	0.945	0.873	6.045	0.855433	0.05
Q15942	Zyxin	ZYX	68.62	6.22	48	7	4	3	3	0.947	0.975	1.009	1.067	1.065	0.982	6.045	1.06244	0.152932
Q9H4A5	Golgi phosphoprotein 3-like	GOLPH3L	38.76	5.62	57	5.3	2	1	1	1.196	1.248	1.303	0.779	0.792	0.727	6.045	0.613291	0.000193026
P01598	Ig kappa chain V-I region EU	P01598	13.73	8.62	204	26.9	6	2	2	1.129	1.101	1.228	0.913	0.85	0.824	6.045	0.74812	0.05
P22626	Heterogeneous nuclear ribonucleoproteins A2/B1	HNRNPA2B1	42.05	8.97	2355	52.1	120	17	16	1.146	1.123	1.096	0.909	0.866	0.905	6.045	0.796434	0.05
Q96P70	Importin-9	IPO9	126.48	4.71	132	3.4	6	4	4	1.054	1.025	1.047	0.987	0.945	0.987	6.045	0.933781	0.05
Q9Y375	Complex I intermediate-associated protein 30, mitochondrial	NDUFAF1	43.3	7.11	101	10.7	7	3	3	0.828	0.817	0.802	1.178	1.195	1.225	6.045	1.47037	0.05
Q9Y6E2	Basic leucine zipper and W2 domain-containing protein 2	BZW2	58.44	6.26	67	6	5	4	3	1.039	1.058	1.084	0.942	0.944	0.978	6.045	0.900346	0.05
Q53FA7	Quinone oxidoreductase PIG3	TP53I3	40.5	6.67	28	5.4	2	2	2	1.227	1.267	1.227	0.796	0.774	0.753	6.044	0.624295	1.38733e-05
P28161	Glutathione S-transferase Mu 2	GSTM2	30.25	6	457	33	25	9	2	1.055	1.121	1.068	0.901	0.944	0.955	6.044	0.863132	0.05
Q8TAT6	Nuclear protein localization protein 4 homolog	NPLOC4	77.53	5.94	351	17.4	17	10	10	1.156	1.067	1.11	0.943	0.881	0.887	6.044	0.813381	0.05
Q9H7D7	WD repeat-containing protein 26	WDR26	79.69	5.74	62	4.1	3	3	3	1.054	1.028	1.035	0.97	0.961	0.996	6.044	0.939044	0.05
Q8WXI4	Acyl-coenzyme A thioesterase 11	ACOT11	76.47	8.66	75	5.4	4	3	4	0.745	0.76	0.745	1.182	1.301	1.311	6.044	1.68622	0.000248445
Q9BTC0	Death-inducer obliterator 1	DIDO1	279.58	8.09	44	1.2	4	3	3	1.207	1.102	1.122	0.867	0.858	0.888	6.044	0.761586	0.05
Q9UIG0	Tyrosine-protein kinase BAZ1B	BAZ1B	211.12	8.7	81	3.4	5	5	6	1.093	1.127	1.057	0.93	0.939	0.898	6.044	0.84437	0.05
Q9Y4L1	Hypoxia up-regulated protein 1	HYOU1	129.37	5.16	1473	25.4	69	22	22	1.264	1.258	1.221	0.778	0.753	0.769	6.043	0.61448	6.10804e-06
P05026	Sodium/potassium-transporting ATPase subunit beta-1	ATP1B1	42.77	8.74	202	22.8	9	5	6	1.076	1.051	1.048	0.92	0.956	0.992	6.043	0.903307	0.05
P15289	Arylsulfatase A	ARSA	56.47	5.65	45	5.7	2	2	3	1.272	1.192	1.213	0.757	0.78	0.829	6.043	0.643459	0.05
P17844	Probable ATP-dependent RNA helicase DDX5	DDX5	77.64	9.06	742	22.6	42	14	9	1.139	1.122	1.111	0.887	0.879	0.905	6.043	0.792112	0.05
P49257	Protein ERGIC-53	LMAN1	64.9	6.3	922	25.5	39	12	14	1.251	1.24	1.213	0.791	0.758	0.79	6.043	0.631479	0.05
P61604	10 kDa heat shock protein, mitochondrial	HSPE1	13.68	8.89	424	54.9	37	7	7	0.859	0.956	0.937	1.091	1.099	1.101	6.043	1.19586	0.05
P78386	Keratin, type II cuticular Hb5	KRT85	63.26	6.28	71	4.9	6	3	2	0.237	0.35	0.161	1.8	1.74	1.755	6.043	7.07888	0.05
Q8N5C6	S1 RNA-binding domain-containing protein 1	SRBD1	134.04	8.94	77	3.9	4	4	4	0.961	0.963	1.012	0.992	1.113	1.002	6.043	1.05824	0.278388
Q8NFC6	Biorientation of chromosomes in cell division protein 1-like 1	BOD1L1	397.97	5	66	0.4	2	1	1	1.214	1.136	1.267	0.758	0.835	0.833	6.043	0.670722	0.05
Q9BX59	Tapasin-related protein	TAPBPL	53.24	5.12	88	7.5	3	3	3	1.157	1.183	1.166	0.848	0.829	0.86	6.043	0.723617	0.05
Q9NPF4	Probable tRNA N6-adenosine threonylcarbamoyltransferase	OSGEP	39.21	5.94	97	11.9	6	4	4	1.188	1.21	1.226	0.807	0.787	0.825	6.043	0.667494	0.05
Q9Y4G6	Talin-2	TLN2	312.28	5.4	881	10	41	21	15	1.152	1.116	1.107	0.857	0.905	0.906	6.043	0.790519	0.05
O95453	Poly(A)-specific ribonuclease PARN	PARN	86.98	5.86	165	8.6	7	5	5	1.244	1.144	1.228	0.797	0.825	0.805	6.043	0.671184	0.05
P47897	Glutamine--tRNA ligase	QARS	99.43	6.71	296	14.7	15	9	10	1.012	1.001	1.047	0.992	0.995	0.996	6.043	0.974837	0.204647
Q10469	Alpha-1,6-mannosyl-glycoprotein 2-beta-N-acetylglucosaminyltransferase	MGAT2	58.62	8.99	82	3.6	2	2	2	1.334	1.265	1.241	0.835	0.68	0.687	6.042	0.573438	0.000696524
P04150	Glucocorticoid receptor	NR3C1	98.66	6	235	10.4	11	7	7	1.25	1.266	1.249	0.768	0.724	0.785	6.042	0.604781	1.27704e-05
P00326	Alcohol dehydrogenase 1C	ADH1C	48.49	8.63	103	9.6	15	5	5	0.932	1.282	0.979	0.851	1.184	0.814	6.042	0.892264	0.515468
Q9Y2V7	Conserved oligomeric Golgi complex subunit 6	COG6	81.08	5.51	46	2.6	2	2	2	1.244	1.189	1.237	0.799	0.788	0.785	6.042	0.646322	0.05
Q15084	Protein disulfide-isomerase A6	PDIA6	55.37	4.95	806	31.4	40	14	15	1.281	1.251	1.207	0.789	0.736	0.778	6.042	0.61594	5.84366e-05
O75534	Cold shock domain-containing protein E1	CSDE1	103.66	5.88	318	14.2	16	12	12	1.088	1.054	1.068	0.937	0.959	0.936	6.042	0.882243	0.05
O75691	Small subunit processome component 20 homolog	UTP20	375.57	7.07	185	2	9	6	5	1.17	1.137	1.122	0.872	0.853	0.888	6.042	0.76203	0.05
P15927	Replication protein A 32 kDa subunit	RPA2	32.78	5.75	245	10	8	2	3	1.202	1.154	1.091	0.849	0.904	0.842	6.042	0.752829	0.05
P23193	Transcription elongation factor A protein 1	TCEA1	41.97	8.64	304	22.6	13	8	8	1.181	1.137	1.175	0.842	0.848	0.859	6.042	0.729745	0.05
P31146	Coronin-1A	CORO1A	56.95	6.25	142	13.2	8	5	5	1.095	1.055	1.064	0.938	0.934	0.956	6.042	0.8799	0.05
P43686	26S protease regulatory subunit 6B	PSMC4	54.33	5.09	291	22	17	11	11	1.125	1.068	1.05	0.951	0.914	0.934	6.042	0.86309	0.05
Q02818	Nucleobindin-1	NUCB1	60.72	5.15	543	39.3	28	15	15	1.104	1.08	1.092	0.95	0.914	0.902	6.042	0.844322	0.05
Q8N573	Oxidation resistance protein 1	OXR1	114.52	5.32	245	9.2	9	7	7	1.145	1.063	1.041	0.931	0.961	0.901	6.042	0.859649	0.05
Q8NBZ7	UDP-glucuronic acid decarboxylase 1	UXS1	54.54	8.99	98	8.8	3	3	3	1.114	1.058	1.069	0.95	0.887	0.964	6.042	0.864239	0.05
Q9NZL9	Methionine adenosyltransferase 2 subunit beta	MAT2B	41.99	6.9	111	11.4	4	4	4	1.22	1.22	1.15	0.795	0.81	0.847	6.042	0.683008	0.05
Q9H4A6	Golgi phosphoprotein 3	GOLPH3	38.89	6.05	96	5	3	1	1	1.325	1.22	1.302	0.717	0.751	0.726	6.041	0.570315	7.95286e-05
P00918	Carbonic anhydrase 2	CA2	35.01	6.87	595	35.4	29	8	9	1.284	1.262	1.236	0.756	0.734	0.769	6.041	0.597303	7.89537e-06
O14735	CDP-diacylglycerol--inositol 3-phosphatidyltransferase	CDIPT	25.24	8.23	164	13.1	9	3	3	1.022	1.027	1.028	0.974	0.979	1.011	6.041	0.963276	0.0795331
P43307	Translocon-associated protein subunit alpha	SSR1	34.97	4.39	130	6.6	6	2	2	1.129	1.18	1.123	0.849	0.901	0.859	6.041	0.760198	0.05
P54803	Galactocerebrosidase	GALC	85.29	6.17	41	2.2	2	2	2	1.233	1.22	1.243	0.771	0.764	0.81	6.041	0.63447	0.05
P61204	ADP-ribosylation factor 3	ARF3	23.85	6.84	804	56.9	35	9	4	1.112	1.056	1.053	0.966	0.9	0.954	6.041	0.875505	0.05
Q9P2K5	Myelin expression factor 2	MYEF2	74.39	8.86	121	10.8	9	8	7	1.131	1.149	1.126	0.909	0.836	0.89	6.041	0.773635	0.05
P09960	Leukotriene A-4 hydrolase	LTA4H	79.26	5.8	293	15.5	18	9	10	1.193	1.163	1.169	0.836	0.834	0.846	6.041	0.713759	0.05
P12830	Cadherin-1	CDH1	106.1	4.58	167	8	7	5	6	1.202	1.234	1.144	0.866	0.781	0.814	6.041	0.68743	0.05
P22087	rRNA 2~-O-methyltransferase fibrillarin	FBL	38.46	10.18	257	20.2	14	7	7	1.131	1.117	1.113	0.926	0.866	0.888	6.041	0.797382	0.05
Q15029	116 kDa U5 small nuclear ribonucleoprotein component	EFTUD2	124.08	4.84	564	18.8	30	16	15	1.141	1.095	1.047	0.931	0.902	0.925	6.041	0.840085	0.05
Q00796	Sorbitol dehydrogenase	SORD	44.66	8.23	192	18.8	8	6	6	0.985	1.017	0.989	1.034	1.025	0.991	6.041	1.01973	0.303586
P02787	Serotransferrin	TF	92.81	6.81	777	25.1	49	16	18	1.181	1.199	1.192	0.812	0.804	0.852	6.04	0.690929	0.05
Q9HB71	Calcyclin-binding protein	CACYBP	34.1	8.28	227	33.8	14	9	8	1.128	1.09	1.083	0.934	0.881	0.924	6.04	0.829749	0.05
Q15397	Pumilio domain-containing protein KIAA0020	KIAA0020	94.33	9.65	27	2.6	2	2	2	1.293	1.257	1.255	0.797	0.727	0.711	6.04	0.587385	5.65872e-05
P26641	Elongation factor 1-gamma	EEF1G	57.99	6.25	210	27.7	17	12	13	1.229	1.223	1.209	0.796	0.779	0.804	6.04	0.649822	0.05
P61106	Ras-related protein Rab-14	RAB14	27.09	5.85	392	37.7	20	8	7	1.133	1.115	1.079	0.922	0.895	0.896	6.04	0.815449	0.05
Q13547	Histone deacetylase 1	HDAC1	65.03	5.31	102	12.9	4	4	4	1.003	1.055	1.004	0.973	1	1.005	6.04	0.972567	0.247437
P52306	Rap1 GTPase-GDP dissociation stimulator 1	RAP1GDS1	76.7	5.17	237	13	8	6	7	1.27	1.206	1.307	0.766	0.753	0.738	6.04	0.596616	7.66239e-05
O60341	Lysine-specific histone demethylase 1A	KDM1A	105.27	6.11	184	9	10	7	7	1.062	1.067	1.067	0.97	0.928	0.946	6.04	0.889862	0.05
O94903	Proline synthase co-transcribed bacterial homolog protein	PROSC	35.19	7.09	142	10.2	7	3	3	1.321	1.186	1.182	0.806	0.741	0.804	6.04	0.6373	0.05
P02794	Ferritin heavy chain	FTH1	24.59	5.3	944	46.4	43	8	8	0.928	1.075	1.204	0.862	0.959	1.012	6.04	0.88338	0.261303
P54886	Delta-1-pyrroline-5-carboxylate synthase	ALDH18A1	96.93	6.66	520	19.6	31	15	15	1.063	1.091	1.109	0.896	0.93	0.951	6.04	0.851057	0.05
P01859	Ig gamma-2 chain C region	IGHG2	42.23	7.66	1480	13.2	80	4	2	1.275	1.222	1.254	0.792	0.724	0.772	6.039	0.609971	4.32886e-05
O43747	AP-1 complex subunit gamma-1	AP1G1	101.77	6.36	295	9.6	15	9	9	1.13	1.118	1.074	0.931	0.903	0.883	6.039	0.817881	0.05
O75147	Obscurin-like protein 1	OBSL1	220.67	5.42	64	1	3	1	2	1.085	1.078	1.153	0.877	0.88	0.966	6.039	0.82117	0.05
P13984	General transcription factor IIF subunit 2	GTF2F2	34.61	9.24	57	12.9	4	4	4	1.153	1.145	1.221	0.778	0.866	0.876	6.039	0.716113	0.05
P15311	Ezrin	EZR	82.32	5.94	417	24.4	31	16	14	1.332	1.287	1.312	0.684	0.709	0.715	6.039	0.53625	2.95065e-06
P58546	Myotrophin	MTPN	16.04	5.27	65	22	3	2	2	1.24	1.226	1.209	0.769	0.806	0.789	6.039	0.643265	0.05
Q9Y2L1	Exosome complex exonuclease RRP44	DIS3	126.29	6.69	55	2.8	3	3	3	1.271	1.131	1.212	0.855	0.808	0.762	6.039	0.671002	0.05
P35858	Insulin-like growth factor-binding protein complex acid labile subunit	IGFALS	69.26	6.33	105	7.3	3	3	3	1.431	1.382	1.259	0.656	0.624	0.687	6.039	0.483055	0.000206827
Q13616	Cullin-1	CUL1	106.12	8.19	247	11.2	12	8	9	1.103	1.113	1.091	0.894	0.908	0.929	6.038	0.825824	0.05
P02774	Vitamin D-binding protein	GC	64.84	5.4	113	7	9	4	4	1.292	1.319	1.24	0.738	0.727	0.722	6.038	0.567904	1.96248e-05
Q8WVJ2	NudC domain-containing protein 2	NUDCD2	20.13	4.99	33	6.4	2	1	1	1.291	1.227	1.273	0.753	0.719	0.775	6.038	0.59272	3.32463e-05
P02042	Hemoglobin subunit delta	HBD	18.91	7.85	4163	51	399	7	4	1.163	1.11	1.131	0.895	0.839	0.9	6.038	0.773796	0.05
P08397	Porphobilinogen deaminase	HMBS	44.12	6.68	79	11.9	6	5	5	1.14	1.144	1.163	0.841	0.887	0.863	6.038	0.751668	0.05
P30519	Heme oxygenase 2	HMOX2	42.37	5.31	121	12.7	6	3	3	1.051	1.022	1.13	0.957	0.949	0.929	6.038	0.885108	0.0548926
Q08945	FACT complex subunit SSRP1	SSRP1	99.01	6.45	166	8	6	5	5	1.232	1.226	1.19	0.819	0.752	0.819	6.038	0.655154	0.05
Q8N9F7	Glycerophosphodiester phosphodiesterase domain-containing protein 1	GDPD1	41.93	8.66	168	10.2	4	2	2	0.976	0.878	0.959	1.053	1.083	1.089	6.038	1.14646	0.05
Q9UHD9	Ubiquilin-2	UBQLN2	68.41	5.15	215	14.7	8	7	4	1.054	0.984	1.035	0.999	0.953	1.013	6.038	0.964855	0.264315
Q9UKU7	Isobutyryl-CoA dehydrogenase, mitochondrial	ACAD8	50.48	8.12	139	11.6	6	5	5	0.785	0.788	0.831	1.231	1.149	1.254	6.038	1.51165	0.05
O60282	Kinesin heavy chain isoform 5C	KIF5C	132	5.86	610	28.6	35	26	15	1.214	1.176	1.196	0.828	0.829	0.795	6.038	0.68377	0.05
P18583	Protein SON	SON	290.19	5.5	373	7.6	23	18	19	1.001	1.049	1.073	0.953	0.955	1.007	6.038	0.933397	0.0677262
P26599	Polypyrimidine tract-binding protein 1	PTBP1	65.15	9.22	258	11.7	13	5	4	1.131	1	1.092	1.011	0.898	0.906	6.038	0.87341	0.0632311
Q9BPX5	Actin-related protein 2/3 complex subunit 5-like protein	ARPC5L	19.45	6.15	195	25.5	7	5	4	0.98	0.966	1.011	1.044	1.026	1.011	6.038	1.04193	0.0712983
Q9Y446	Plakophilin-3	PKP3	93.9	9.39	60	3.4	3	3	3	1.27	1.184	1.114	0.834	0.801	0.835	6.038	0.692265	0.05
P0C2Y1	Putative neuroblastoma breakpoint family member 7	NBPF7	56.82	4.73	59	1.9	5	1	1	1.123	1.202	0.913	1.001	1.02	0.778	6.037	0.864422	0.276629
P15374	Ubiquitin carboxyl-terminal hydrolase isozyme L3	UCHL3	29.55	4.84	107	11.7	4	2	2	1.208	1.202	1.2	0.806	0.764	0.857	6.037	0.672299	0.05
Q5TBA9	Protein furry homolog	FRY	376.23	5.66	90	1.4	4	3	3	0.974	0.964	0.945	1.099	0.974	1.081	6.037	1.094	0.141003
Q8NFP9	Neurobeachin	NBEA	362.84	5.78	258	3.7	13	10	10	1.29	1.234	1.234	0.764	0.723	0.792	6.037	0.60644	5.59599e-05
Q8IXS6	Paralemmin-2	PALM2	51.1	5.04	63	11.1	5	5	5	1.286	1.161	1.291	0.736	0.779	0.784	6.037	0.615035	0.000445238
O15523	ATP-dependent RNA helicase DDX3Y	DDX3Y	81.36	7.24	569	22.1	29	12	3	1.206	1.236	1.245	0.763	0.765	0.822	6.037	0.637375	0.05
P07741	Adenine phosphoribosyltransferase	APRT	21.83	5.78	45	8.3	2	2	2	1.204	1.138	1.239	0.801	0.828	0.827	6.037	0.685842	0.05
P32004	Neural cell adhesion molecule L1	L1CAM	154.86	5.84	53	1.8	2	2	2	1.215	1.149	1.251	0.769	0.868	0.785	6.037	0.669986	0.05
Q13617	Cullin-2	CUL2	101.53	6.45	101	6.8	6	5	5	1.096	0.998	1.081	0.913	0.983	0.966	6.037	0.901417	0.0549953
Q5T0N5	Formin-binding protein 1-like	FNBP1L	83.31	6.2	57	3.8	3	3	3	1.128	1.189	1.223	0.831	0.831	0.835	6.037	0.705367	0.05
Q96HU1	Small G protein signaling modulator 3	SGSM3	94.46	5.67	146	6.1	7	5	5	1.247	1.201	1.182	0.856	0.77	0.781	6.037	0.663085	0.05
Q7KYR7	Butyrophilin subfamily 2 member A1	BTN2A1	65.89	6.08	48	3.4	2	2	2	1.232	1.212	1.218	0.765	0.773	0.837	6.037	0.648553	0.05
Q9NX62	Inositol monophosphatase 3	IMPAD1	44.56	6.38	172	11.1	12	5	5	1.153	1.179	1.159	0.821	0.856	0.869	6.037	0.729304	0.05
Q8WU90	Zinc finger CCCH domain-containing protein 15	ZC3H15	63.18	5.22	92	11.3	5	4	4	1.273	1.254	1.26	0.74	0.774	0.735	6.036	0.593874	2.84992e-06
P28331	NADH-ubiquinone oxidoreductase 75 kDa subunit, mitochondrial	NDUFS1	89.84	5.89	802	25.6	34	17	17	1.082	1.099	1.08	0.913	0.947	0.915	6.036	0.850966	0.05
P52565	Rho GDP-dissociation inhibitor 1	ARHGDIA	27.83	5.02	290	31.9	18	7	7	1.165	1.176	1.176	0.835	0.852	0.832	6.036	0.716235	0.05
Q05193	Dynamin-1	DNM1	110.35	6.73	391	20	26	17	10	1.059	1.051	1.065	0.963	0.993	0.905	6.036	0.901102	0.0527018
Q96T76	MMS19 nucleotide excision repair protein homolog	MMS19	123.64	5.92	84	4.1	5	5	5	1.094	1.158	1.131	0.889	0.867	0.897	6.036	0.784215	0.05
P04066	Tissue alpha-L-fucosidase	FUCA1	59.9	6.37	74	3.6	4	2	2	1.25	1.308	1.21	0.782	0.745	0.741	6.036	0.601911	8.97773e-05
O14828	Secretory carrier-associated membrane protein 3	SCAMP3	41.18	7.55	321	20.2	9	4	4	1.032	0.992	1.069	0.973	0.975	0.995	6.036	0.951503	0.143827
O75340	Programmed cell death protein 6	PDCD6	23.52	5.16	70	12	4	3	3	1.116	1.165	1.131	0.885	0.853	0.886	6.036	0.76905	0.05
Q9H8H0	Nucleolar protein 11	NOL11	93.96	5.74	31	2.6	2	2	2	1.246	1.174	1.21	0.826	0.807	0.773	6.036	0.66281	0.05
P19022	Cadherin-2	CDH2	109.14	4.64	315	15.1	10	8	9	0.964	0.961	0.929	1.11	1.012	1.059	6.035	1.11458	0.05
O43865	Adenosylhomocysteinase 2	AHCYL1	68.93	6.49	158	19.2	13	8	3	1.197	1.12	1.011	0.957	0.887	0.863	6.035	0.813401	0.05
O75150	E3 ubiquitin-protein ligase BRE1B	RNF40	132.2	5.93	85	4.5	5	5	5	1.115	1.085	1.172	0.867	0.927	0.869	6.035	0.789739	0.05
P11940	Polyadenylate-binding protein 1	PABPC1	80.48	9.52	557	26.1	33	17	9	1.06	1.063	1.118	0.921	0.956	0.917	6.035	0.86208	0.05
Q14444	Caprin-1	CAPRIN1	85.14	5.14	216	6.8	14	5	4	1.086	1.092	1.033	0.938	0.926	0.96	6.035	0.879477	0.05
Q96PE7	Methylmalonyl-CoA epimerase, mitochondrial	MCEE	22.06	9.17	52	11.4	3	2	2	0.969	0.919	0.982	1.056	1.031	1.078	6.035	1.10279	0.05
Q96GQ7	Probable ATP-dependent RNA helicase DDX27	DDX27	110.23	9.33	62	3.5	3	3	3	1.259	1.131	1.209	0.881	0.794	0.761	6.035	0.676855	0.05
O95486	Protein transport protein Sec24A	SEC24A	127.81	7.58	153	6.1	9	4	5	1.058	1.167	1.112	0.819	1.043	0.835	6.034	0.808211	0.0809359
Q9BXS4	Transmembrane protein 59	TMEM59	39.63	5	90	4	2	1	1	1.292	1.148	1.182	0.817	0.751	0.844	6.034	0.66593	0.05
P98179	RNA-binding protein 3	RBM3	18.08	8.86	35	10.8	2	2	2	1.429	1.308	1.323	0.664	0.646	0.664	6.034	0.486207	5.55436e-05
O75396	Vesicle-trafficking protein SEC22b	SEC22B	28.01	6.43	1257	38.1	41	7	7	1.133	1.193	1.216	0.862	0.809	0.821	6.034	0.703557	0.05
P29401	Transketolase	TKT	78.37	7.58	1057	31.3	50	16	16	1.2	1.158	1.156	0.852	0.83	0.838	6.034	0.717131	0.05
P40925	Malate dehydrogenase, cytoplasmic	MDH1	43.96	6.91	576	43.1	37	15	18	1.053	1.114	1.053	0.923	0.944	0.947	6.034	0.873913	0.05
Q5JPH6	Probable glutamate--tRNA ligase, mitochondrial	EARS2	64.38	8.97	86	7.5	5	4	4	1.146	1.163	1.159	0.858	0.862	0.846	6.034	0.739908	0.05
Q9UPY3	Endoribonuclease Dicer	DICER1	250.61	5.47	97	0.6	2	1	1	1.247	1.154	1.189	0.805	0.825	0.814	6.034	0.68078	0.05
P61011	Signal recognition particle 54 kDa protein	SRP54	67.18	8.87	339	17.3	18	8	8	1.163	1.235	1.161	0.842	0.831	0.802	6.034	0.69542	0.05
Q8TBQ9	Protein kish-A	TMEM167A	9.26	9.26	38	12.5	2	1	1	1.175	1.466	1.344	0.619	0.708	0.721	6.033	0.513927	0.00202024
P07738	Bisphosphoglycerate mutase	BPGM	34.05	6.1	271	25.9	12	5	6	1.122	1.098	1.094	0.922	0.879	0.918	6.033	0.820459	0.05
P11233	Ras-related protein Ral-A	RALA	28.77	6.66	141	19.4	6	3	3	0.875	0.901	0.896	1.132	1.128	1.101	6.033	1.25786	0.05
Q01459	Di-N-acetylchitobiase	CTBS	49.69	6.19	35	6	2	2	2	1.311	1.136	1.233	0.835	0.776	0.742	6.033	0.639402	0.05
Q13630	GDP-L-fucose synthase	TSTA3	40.68	6.13	105	16.2	3	3	3	1.125	1.127	1.103	0.868	0.897	0.913	6.033	0.798212	0.05
Q13885	Tubulin beta-2A chain	TUBB2A	53.94	4.78	2702	54.2	136	18	1	1.063	1.101	1.103	0.919	0.947	0.9	6.033	0.846648	0.05
Q92620	Pre-mRNA-splicing factor ATP-dependent RNA helicase PRP16	DHX38	158.92	6.11	54	2.9	3	3	4	1.018	1.067	1.093	0.918	0.953	0.984	6.033	0.898364	0.05
Q93052	Lipoma-preferred partner	LPP	74.46	7.18	148	9.5	13	6	5	0.971	0.896	0.947	1.082	1.075	1.062	6.033	1.14392	0.05
P54289	Voltage-dependent calcium channel subunit alpha-2/delta-1	CACNA2D1	140.98	5.12	411	12.2	27	13	12	1.306	1.281	1.287	0.709	0.713	0.737	6.033	0.557305	9.94383e-07
O75153	Clustered mitochondria protein homolog	CLUH	162.67	5.75	92	2.9	4	4	4	1.134	1.006	1.224	0.871	0.904	0.894	6.033	0.793401	0.0639303
P07858	Cathepsin B	CTSB	42.43	5.88	148	4.7	8	2	2	1.214	1.196	1.214	0.799	0.789	0.821	6.033	0.664735	0.05
P10155	60 kDa SS-A/Ro ribonucleoprotein	TROVE2	72.14	8.27	288	14.1	17	9	10	1.166	1.123	1.159	0.864	0.842	0.879	6.033	0.74971	0.05
P12955	Xaa-Pro dipeptidase	PEPD	59.89	5.64	217	15.4	11	7	8	1.167	1.166	1.154	0.848	0.848	0.85	6.033	0.730141	0.05
Q6IN85	Serine/threonine-protein phosphatase 4 regulatory subunit 3A	SMEK1	109.91	4.83	107	5.2	5	4	4	1.219	1.123	1.155	0.858	0.858	0.82	6.033	0.725193	0.05
Q8TC07	TBC1 domain family member 15	TBC1D15	90.89	5.44	144	11.6	8	6	9	1.083	1.01	1.044	0.965	0.943	0.988	6.033	0.923175	0.05
Q9UBX3	Mitochondrial dicarboxylate carrier	SLC25A10	34.7	9.62	87	12.9	3	2	3	0.932	1.095	1.058	0.924	1.089	0.934	6.032	0.955267	0.561531
O14910	Protein lin-7 homolog A	LIN7A	29.76	8.83	99	18.9	8	5	2	1.152	1.101	1.135	0.91	0.881	0.853	6.032	0.780401	0.05
O60234	Glia maturation factor gamma	GMFG	19.71	5.18	72	29.6	6	4	5	0.937	0.873	0.95	1.094	1.055	1.123	6.032	1.18551	0.05
P01871	Ig mu chain C region	IGHM	55.23	6.35	388	16.6	21	6	7	1.222	1.171	1.174	0.808	0.819	0.838	6.032	0.691057	0.05
P46940	Ras GTPase-activating-like protein IQGAP1	IQGAP1	220.7	6.08	991	17.5	52	26	26	1.142	1.111	1.116	0.898	0.866	0.899	6.032	0.790442	0.05
P49321	Nuclear autoantigenic sperm protein	NASP	99.91	4.26	51	4.4	5	4	3	1.048	1.116	1.115	0.864	0.927	0.962	6.032	0.839585	0.05
P50395	Rab GDP dissociation inhibitor beta	GDI2	59.8	6.11	1118	40.4	53	16	8	1.204	1.223	1.132	0.849	0.84	0.784	6.032	0.694858	0.05
P80108	Phosphatidylinositol-glycan-specific phospholipase D	GPLD1	100.7	5.91	50	2.7	2	2	2	1.251	1.098	1.251	0.847	0.771	0.814	6.032	0.675556	0.05
P82930	28S ribosomal protein S34, mitochondrial	MRPS34	28.44	9.98	66	18.8	5	4	4	0.931	0.887	0.956	1.072	1.067	1.119	6.032	1.17448	0.05
Q14BN4	Sarcolemmal membrane-associated protein	SLMAP	112.72	5.35	234	16.5	14	14	14	0.911	0.875	0.9	1.108	1.083	1.155	6.032	1.24572	0.05
Q86X19	Transmembrane protein 17	TMEM17	24.46	6.3	53	8.1	3	2	2	0.926	1.142	1.274	1.004	0.815	0.871	6.032	0.804907	0.153938
Q9NPR9	Protein GPR108	GPR108	68.15	8.88	77	2	2	1	1	1.304	1.186	1.219	0.766	0.731	0.826	6.032	0.626314	0.05
Q9UKM9	RNA-binding protein Raly	RALY	37.77	9.2	214	25.8	14	9	9	0.99	1.03	1.055	0.963	0.995	0.999	6.032	0.961626	0.165146
Q9Y3B3	Transmembrane emp24 domain-containing protein 7	TMED7	28.48	6.43	127	7.6	6	2	2	1.147	1.271	1.188	0.774	0.831	0.821	6.032	0.672768	0.05
Q00610	Clathrin heavy chain 1	CLTC	215.49	5.48	2590	34.4	130	44	47	1.057	1.094	1.01	0.97	0.978	0.923	6.032	0.908257	0.05
Q8IYS2	Uncharacterized protein KIAA2013	KIAA2013	75.41	8.44	38	2.5	2	2	2	1.218	1.202	1.182	0.819	0.808	0.803	6.032	0.674625	0.05
Q9BVP2	Guanine nucleotide-binding protein-like 3	GNL3	78.05	9.23	128	7.8	5	4	4	1.49	1.373	1.541	0.549	0.492	0.586	6.031	0.369437	8.26723e-05
Q15485	Ficolin-2	FCN2	38.33	6.31	45	4.5	2	2	2	1.315	1.277	1.269	0.726	0.714	0.73	6.031	0.562031	2.98014e-06
O43150	Arf-GAP with SH3 domain, ANK repeat and PH domain-containing protein 2	ASAP2	131.17	6.24	60	2.5	4	3	3	1.201	1.191	1.184	0.812	0.818	0.825	6.031	0.686521	0.05
P07311	Acylphosphatase-1	ACYP1	13.78	9.3	63	30.3	4	3	3	1.188	1.151	1.112	0.872	0.828	0.88	6.031	0.747609	0.05
P10809	60 kDa heat shock protein, mitochondrial	HSPD1	73.56	5.7	4498	51.7	171	27	27	0.947	1.056	1.042	0.941	1.084	0.961	6.031	0.980624	0.74565
P31930	Cytochrome b-c1 complex subunit 1, mitochondrial	UQCRC1	56.96	5.94	573	19.4	24	9	8	0.856	0.89	0.925	1.076	1.116	1.168	6.031	1.25796	0.05
P46379	Large proline-rich protein BAG6	BAG6	123	5.4	224	8.7	11	7	8	1.057	1.05	1.102	0.931	0.938	0.953	6.031	0.879402	0.05
Q14624	Inter-alpha-trypsin inhibitor heavy chain H4	ITIH4	113.15	6.51	185	7.8	12	8	8	1.242	1.213	1.196	0.808	0.778	0.794	6.031	0.651876	0.05
Q9H0C8	Integrin-linked kinase-associated serine/threonine phosphatase 2C	ILKAP	50.33	6.69	48	9.2	5	4	4	1.155	1.12	1.151	0.829	0.876	0.9	6.031	0.760362	0.05
Q9P0J1	[Pyruvate dehydrogenase [acetyl-transferring]]-phosphatase 1, mitochondrial	PDP1	67.09	6.2	300	19	9	7	8	0.85	0.856	0.91	1.109	1.153	1.153	6.031	1.30543	0.05
Q9BWW4	Single-stranded DNA-binding protein 3	SSBP3	42.4	6.4	82	5.4	3	2	1	1.338	1.255	1.291	0.668	0.727	0.752	6.031	0.552781	7.47749e-05
O15394	Neural cell adhesion molecule 2	NCAM2	107.31	5.44	65	5.4	3	3	4	0.938	1.021	1.087	0.964	1.005	1.016	6.031	0.979974	0.692968
P33908	Mannosyl-oligosaccharide 1,2-alpha-mannosidase IA	MAN1A1	83	6.04	52	6.1	5	4	4	1.154	1.154	1.183	0.824	0.872	0.844	6.031	0.727585	0.05
Q14839	Chromodomain-helicase-DNA-binding protein 4	CHD4	259.97	5.62	450	10.7	25	19	16	1.158	1.062	1.076	0.946	0.887	0.902	6.031	0.829794	0.05
Q8WXH0	Nesprin-2	SYNE2	938.63	5.26	1051	8	63	49	51	1.226	1.181	1.183	0.832	0.796	0.813	6.031	0.679944	0.05
Q96N76	Urocanate hydratase	UROC1	80.62	6.34	148	4.4	5	2	3	1.287	1.125	0.956	1.023	0.89	0.75	6.031	0.790677	0.133243
Q96T23	Remodeling and spacing factor 1	RSF1	202.38	4.94	303	7.5	14	11	11	1.028	0.973	1.028	0.998	0.986	1.018	6.031	0.991086	0.691607
Q9Y4C2	TRPM8 channel-associated factor 1	TCAF1	112.54	6.12	167	7.5	11	6	7	1.074	1.027	1.05	0.973	0.956	0.951	6.031	0.913996	0.05
P50570	Dynamin-2	DNM2	110.49	7.04	510	24.6	33	19	11	1.013	1.06	1.051	0.938	1.015	0.954	6.031	0.930538	0.0706379
Q02543	60S ribosomal protein L18a	RPL18A	25.16	10.73	125	22.2	5	3	4	1.009	1.253	1.01	0.885	0.949	0.925	6.031	0.843215	0.164156
P05198	Eukaryotic translation initiation factor 2 subunit 1	EIF2S1	41.42	5.02	143	18.4	10	6	6	1.107	1.045	1.065	0.912	0.924	0.977	6.03	0.874417	0.05
P78381	UDP-galactose translocator	SLC35A2	44.89	9.98	52	2.8	2	1	1	1.197	1.163	1.214	0.819	0.823	0.814	6.03	0.687185	0.05
Q96HS1	Serine/threonine-protein phosphatase PGAM5, mitochondrial	PGAM5	34.96	8.88	131	15.9	6	4	5	1.178	1.227	1.162	0.812	0.796	0.855	6.03	0.690496	0.05
P30566	Adenylosuccinate lyase	ADSL	61.78	6.69	134	12.6	8	5	5	1.195	1.102	1.136	0.885	0.852	0.86	6.03	0.756481	0.05
P50454	Serpin H1	SERPINH1	54.55	8.75	436	25.1	14	9	9	1.109	1.133	1.106	0.902	0.876	0.904	6.03	0.801075	0.05
P60174	Triosephosphate isomerase	TPI1	35.87	5.65	1505	39.9	63	10	10	1.074	1.12	1.108	0.892	0.966	0.87	6.03	0.826166	0.05
P68032	Actin, alpha cardiac muscle 1	ACTC1	46.92	5.23	6862	58.6	394	20	8	0.969	1.083	0.972	1.059	0.969	0.978	6.03	0.994048	0.905347
Q96L93	Kinesin-like protein KIF16B	KIF16B	179.07	5.86	38	1.7	4	3	2	1.172	1.23	1.199	0.814	0.775	0.84	6.03	0.674535	0.05
Q9C0C9	E2/E3 hybrid ubiquitin-protein ligase UBE2O	UBE2O	162.8	5.01	134	4.3	7	6	6	1.052	1.087	1.116	0.936	0.925	0.914	6.03	0.852535	0.05
Q9H9E3	Conserved oligomeric Golgi complex subunit 4	COG4	101	5.09	95	7.6	6	6	7	1.196	1.184	1.208	0.804	0.792	0.846	6.03	0.680602	0.05
Q9Y6D0	Selenoprotein K	SELK	11.56	10.86	59	9.6	2	1	1	1.147	1.36	1.137	0.768	0.783	0.835	6.03	0.654775	0.05
Q9H173	Nucleotide exchange factor SIL1	SIL1	59.67	5.27	114	11.9	8	6	6	1.221	1.192	1.154	0.824	0.821	0.818	6.03	0.690496	0.05
P14866	Heterogeneous nuclear ribonucleoprotein L	HNRNPL	71.59	8.46	997	26.7	50	11	11	1.105	1.098	1.113	0.907	0.867	0.939	6.029	0.818154	0.05
O14791	Apolipoprotein L1	APOL1	49.96	5.6	97	9.8	5	4	4	1.322	1.302	1.283	0.742	0.672	0.708	6.029	0.543128	1.35765e-05
P23284	Peptidyl-prolyl cis-trans isomerase B	PPIB	29.97	9.42	560	45.8	32	10	10	1.256	1.24	1.269	0.784	0.734	0.746	6.029	0.601328	8.40413e-06
O43505	Beta-1,4-glucuronyltransferase 1	B4GAT1	50.98	6.77	152	19.3	8	6	7	1.11	1.191	1.174	0.837	0.854	0.863	6.029	0.734964	0.05
P16104	Histone H2AX	H2AFX	18.34	10.74	183	23.1	20	5	3	0.801	0.844	0.924	1.131	1.099	1.23	6.029	1.34683	0.05
P61353	60S ribosomal protein L27	RPL27	21.29	10.56	100	26.5	9	4	4	0.99	1.305	1.007	0.84	1.057	0.83	6.029	0.825863	0.21042
P61981	14-3-3 protein gamma	YWHAG	32.58	4.8	980	46.6	55	13	7	1.107	1.129	1.101	0.904	0.887	0.901	6.029	0.806713	0.05
Q86Y82	Syntaxin-12	STX12	35.63	5.45	116	24.6	8	6	6	0.894	0.818	0.838	1.149	1.175	1.155	6.029	1.36431	0.05
Q8NC51	Plasminogen activator inhibitor 1 RNA-binding protein	SERBP1	53.24	8.66	53	11.8	5	3	5	1.024	0.997	1.012	0.979	1.038	0.979	6.029	0.987801	0.606394
Q9H0R4	Haloacid dehalogenase-like hydrolase domain-containing protein 2	HDHD2	32.64	5.84	49	10	4	3	3	1.007	1.062	0.998	0.918	1.031	1.013	6.029	0.965765	0.446367
Q9NYK5	39S ribosomal protein L39, mitochondrial	MRPL39	45.39	7.56	142	18.6	7	6	7	1.022	1.009	0.986	0.974	1.006	1.032	6.029	0.998343	0.937687
Q9Y5B9	FACT complex subunit SPT16	SUPT16H	145.16	5.5	445	14.2	27	13	15	1.24	1.131	1.106	0.872	0.827	0.853	6.029	0.733966	0.05
Q9Y6X5	Bis(5~-adenosyl)-triphosphatase ENPP4	ENPP4	57.51	5.71	103	4.9	3	2	2	1.184	1.157	1.13	0.843	0.875	0.84	6.029	0.736963	0.05
P48449	Lanosterol synthase	LSS	89.72	6.16	217	10	12	7	7	1.029	1.036	1.011	0.991	0.963	0.999	6.029	0.960013	0.05
P62277	40S ribosomal protein S13	RPS13	21.57	10.53	248	47.7	17	8	8	0.975	1.269	1.055	0.841	1.023	0.866	6.029	0.827523	0.155844
P56182	Ribosomal RNA processing protein 1 homolog A	RRP1	60.37	9.39	124	8.9	6	4	4	1.327	1.353	1.303	0.713	0.682	0.65	6.028	0.513432	9.93173e-06
O14561	Acyl carrier protein, mitochondrial	NDUFAB1	19.41	4.82	141	13.5	11	3	3	1.003	1.199	1.105	0.795	1.032	0.894	6.028	0.8228	0.0957671
P02652	Apolipoprotein A-II	APOA2	13.8	6.26	123	17	9	2	2	1.097	1.021	1.065	0.95	0.961	0.934	6.028	0.893811	0.05
P42696	RNA-binding protein 34	RBM34	62.86	10.11	48	4.2	2	2	2	1.222	1.12	1.158	0.818	0.908	0.802	6.028	0.722286	0.05
Q10570	Cleavage and polyadenylation specificity factor subunit 1	CPSF1	176.47	5.99	278	8.5	14	11	11	1.119	1.017	1.094	0.919	0.96	0.919	6.028	0.866254	0.05
P08311	Cathepsin G	CTSG	30.31	11.19	265	22	16	6	6	0.792	0.828	0.84	1.224	1.137	1.207	6.028	1.45041	0.05
P09417	Dihydropteridine reductase	QDPR	29.44	6.9	291	32.4	13	4	4	1.004	0.952	1.002	1.042	0.978	1.05	6.028	1.03786	0.264663
P53041	Serine/threonine-protein phosphatase 5	PPP5C	66.58	5.88	252	12	15	7	7	1.161	1.192	1.172	0.816	0.843	0.844	6.028	0.710071	0.05
P61225	Ras-related protein Rap-2b	RAP2B	23.47	4.73	112	27.3	6	5	3	0.818	0.846	0.836	1.135	1.165	1.228	6.028	1.4112	0.05
Q9BXX0	EMILIN-2	EMILIN2	130.39	6.04	139	6.1	9	7	7	1.131	1.083	1.059	0.915	0.923	0.917	6.028	0.841735	0.05
Q9NTK5	Obg-like ATPase 1	OLA1	55.26	7.64	249	27.8	16	10	10	1.052	1.174	1.071	0.879	0.991	0.861	6.028	0.828329	0.05
P0C0S8	Histone H2A type 1	HIST1H2AG	17.52	10.9	434	26.9	28	3	1	0.989	1.264	1.142	0.785	1.033	0.815	6.028	0.775552	0.0850237
Q9HD33	39S ribosomal protein L47, mitochondrial	MRPL47	35.56	10.38	133	17.6	9	4	4	0.856	0.91	0.891	1.112	1.121	1.137	6.027	1.26835	0.05
Q9Y6D5	Brefeldin A-inhibited guanine nucleotide-exchange protein 2	ARFGEF2	229.85	5.93	194	6.2	11	10	8	1.122	1.1	1.109	0.897	0.888	0.911	6.027	0.809367	0.05
Q96BY9	Store-operated calcium entry-associated regulatory factor	SARAF	40.96	7.49	63	5	3	2	2	1.196	1.277	1.407	0.713	0.718	0.716	6.027	0.553351	0.000714619
P53999	Activated RNA polymerase II transcriptional coactivator p15	SUB1	18.97	9.6	217	31.5	13	5	5	1.32	1.289	1.241	0.731	0.736	0.71	6.027	0.565455	2.14366e-05
O00461	Golgi integral membrane protein 4	GOLIM4	91.51	4.73	153	8.2	7	6	7	1.227	1.162	1.131	0.854	0.819	0.834	6.027	0.712216	0.05
P02654	Apolipoprotein C-I	APOC1	11.62	8.01	111	21.7	6	2	2	1.192	1.162	1.141	0.873	0.832	0.827	6.027	0.724464	0.05
P20337	Ras-related protein Rab-3B	RAB3B	28.41	4.85	220	30.1	16	6	4	1.043	1.045	1.096	0.941	0.949	0.953	6.027	0.892902	0.05
P51571	Translocon-associated protein subunit delta	SSR4	20.53	5.76	145	23.1	8	4	4	1.195	1.159	1.147	0.872	0.811	0.843	6.027	0.721508	0.05
Q12788	Transducin beta-like protein 3	TBL3	97.68	6.44	31	3.3	3	3	3	1.198	1.17	1.188	0.837	0.802	0.832	6.027	0.694882	0.05
Q15042	Rab3 GTPase-activating protein catalytic subunit	RAB3GAP1	127.18	5.38	205	8.4	11	9	9	1.131	1.123	1.146	0.888	0.862	0.877	6.027	0.772647	0.05
Q6L8Q7	2~,5~-phosphodiesterase 12	PDE12	75.55	6.11	117	7.7	4	4	5	0.857	0.895	0.838	1.17	1.089	1.178	6.027	1.32703	0.05
Q9NQ66	1-phosphatidylinositol 4,5-bisphosphate phosphodiesterase beta-1	PLCB1	167.52	5.9	51	2.9	3	3	3	1.258	1.089	1.009	1.003	0.788	0.88	6.027	0.795888	0.0783611
Q9UBB6	Neurochondrin	NCDN	86.2	5.34	187	10.6	8	6	7	1.006	1.044	1.041	0.957	0.977	1.002	6.027	0.949854	0.05
Q9UI08	Ena/VASP-like protein	EVL	50.21	8.91	104	12.5	6	4	4	1.105	1.034	1.181	0.875	0.885	0.947	6.027	0.815361	0.05
Q9UK61	Protein FAM208A	FAM208A	219.33	5.55	84	2.6	4	4	4	1.152	1.095	1.097	0.881	0.894	0.908	6.027	0.802333	0.05
O60547	GDP-mannose 4,6 dehydratase	GMDS	48.45	6.87	80	9.4	5	4	4	0.932	1.065	1.069	0.957	1.018	0.986	6.027	0.965753	0.528694
O95232	Luc7-like protein 3	LUC7L3	61.92	9.81	149	15.3	6	6	6	1.029	0.996	1	1.042	1.001	0.959	6.027	0.992397	0.790018
P02768	Serum albumin	ALB	85.3	5.92	3453	47.8	202	30	31	1.234	1.19	1.208	0.8	0.8	0.795	6.027	0.659416	0.05
P39019	40S ribosomal protein S19	RPS19	19.72	10.31	332	39.3	18	6	6	1.038	1.174	1.091	0.834	0.95	0.94	6.027	0.824705	0.05
P45974	Ubiquitin carboxyl-terminal hydrolase 5	USP5	108.55	4.91	345	16.1	26	16	15	1.155	1.142	1.172	0.84	0.868	0.85	6.027	0.737388	0.05
Q96RK4	Bardet-Biedl syndrome 4 protein	BBS4	68.56	6.9	55	6.9	2	2	3	1.065	0.977	1.015	1.003	0.948	1.019	6.027	0.971541	0.434795
Q9NP90	Ras-related protein Rab-9B	RAB9B	25.8	4.74	80	10	3	2	1	1.198	1.246	1.111	0.779	0.885	0.808	6.027	0.695359	0.05
Q9ULC4	Malignant T-cell-amplified sequence 1	MCTS1	25.35	8.98	43	19.3	3	3	3	1.108	1.203	1.176	0.805	0.85	0.885	6.027	0.72842	0.05
O75964	ATP synthase subunit g, mitochondrial	ATP5L	13.48	9.65	248	19.4	17	2	2	0.805	0.75	0.842	1.219	1.195	1.215	6.026	1.51398	0.05
P49902	Cytosolic purine 5~-nucleotidase	NT5C2	73.86	5.75	129	7.8	7	3	4	1.098	1.102	1.102	0.892	0.873	0.959	6.026	0.824955	0.05
Q15181	Inorganic pyrophosphatase	PPA1	39.74	5.54	89	12.1	8	4	4	1.251	1.196	1.214	0.773	0.796	0.796	6.026	0.645998	0.05
Q9Y5P4	Collagen type IV alpha-3-binding protein	COL4A3BP	80.87	5.29	91	4	4	3	3	1.193	1.116	1.123	0.844	0.842	0.908	6.026	0.755828	0.05
O15305	Phosphomannomutase 2	PMM2	33.45	6.35	122	10.2	2	2	2	1.23	1.226	1.163	0.868	0.774	0.765	6.026	0.665101	0.05
O15498	Synaptobrevin homolog YKT6	YKT6	26.24	6.44	43	11.6	4	3	3	1.247	1.184	1.27	0.754	0.781	0.79	6.026	0.628209	0.05
P01024	Complement C3	C3	214.69	6.02	1772	22.5	86	33	34	1.214	1.196	1.181	0.821	0.796	0.818	6.026	0.678084	0.05
P23142	Fibulin-1	FBLN1	85.39	5.07	214	9.4	8	5	6	1.106	1.037	1.076	0.876	0.942	0.989	6.026	0.87201	0.05
Q6IA86	Elongator complex protein 2	ELP2	103.66	5.6	55	1.9	3	2	2	1.067	0.962	0.924	1.057	1.021	0.995	6.026	1.04064	0.458634
Q7Z478	ATP-dependent RNA helicase DHX29	DHX29	183.03	8.3	116	5.1	7	7	7	1.141	1.103	1.112	0.896	0.875	0.899	6.026	0.79559	0.05
Q9C0J8	pre-mRNA 3~ end processing protein WDR33	WDR33	158.12	9.24	61	2.2	3	3	3	1.154	1.074	1.089	0.894	0.897	0.918	6.026	0.816702	0.05
Q9Y266	Nuclear migration protein nudC	NUDC	46.3	5.27	463	33.5	20	10	10	1.109	1.128	1.126	0.904	0.882	0.877	6.026	0.791853	0.05
Q9Y3I0	tRNA-splicing ligase RtcB homolog	RTCB	63.25	6.77	1003	33.7	49	15	15	1.223	1.198	1.196	0.826	0.784	0.799	6.026	0.666022	0.05
P61165	Transmembrane protein 258	TMEM258	9.76	5.58	45	10.1	2	1	1	1.224	1.318	1.165	0.762	0.781	0.776	6.026	0.625573	0.05
O43292	Glycosylphosphatidylinositol anchor attachment 1 protein	GPAA1	71.13	8.16	48	5.6	3	3	4	1.054	1.064	1.14	0.916	0.901	0.95	6.025	0.849294	0.05
P09001	39S ribosomal protein L3, mitochondrial	MRPL3	46.23	9.52	100	8.3	5	3	3	1.005	1.049	1.036	0.913	1	1.022	6.025	0.949838	0.257194
P31689	DnaJ homolog subfamily A member 1	DNAJA1	54.06	6.65	173	17.1	6	4	6	0.957	0.93	0.975	1.048	1.03	1.085	6.025	1.10517	0.05
P41229	Lysine-specific demethylase 5C	KDM5C	196.62	5.44	42	1.7	2	2	2	1.145	1.167	1.185	0.808	0.866	0.854	6.025	0.722905	0.05
P51692	Signal transducer and activator of transcription 5B	STAT5B	99.95	5.71	294	9.9	16	9	8	1.12	1.133	1.095	0.851	0.918	0.908	6.025	0.799582	0.05
Q96S19	UPF0585 protein C16orf13	C16orf13	24.68	7.71	111	24.5	5	5	5	0.973	0.987	0.971	1.013	1.048	1.033	6.025	1.05561	0.05
Q96T37	Putative RNA-binding protein 15	RBM15	118.81	10.09	169	6.9	9	6	5	0.997	0.993	1.006	0.981	0.962	1.086	6.025	1.01101	0.802737
Q9BY44	Eukaryotic translation initiation factor 2A	EIF2A	78.35	9	130	7	6	3	3	1.108	1.061	1.138	0.887	0.87	0.961	6.025	0.821893	0.05
Q9H857	5~-nucleotidase domain-containing protein 2	NT5DC2	66.06	6.3	79	6.3	4	4	4	1.179	1.271	1.177	0.77	0.787	0.841	6.025	0.661152	0.05
O75063	Glycosaminoglycan xylosylkinase	FAM20B	52.36	6.4	202	12.5	9	5	5	1.04	1.115	1.05	0.989	0.871	0.96	6.025	0.879875	0.05
P00736	Complement C1r subcomponent	C1R	90.08	5.82	80	3.4	4	3	3	1.18	1.136	1.156	0.857	0.822	0.874	6.025	0.735311	0.05
P05141	ADP/ATP translocase 2	SLC25A5	38.56	9.71	1932	40.9	98	13	4	1.174	1.166	1.015	0.904	0.979	0.787	6.025	0.795827	0.05
P06681	Complement C2	C2	93.06	7.23	36	2.7	2	2	2	1.173	1.18	1.164	0.808	0.833	0.867	6.025	0.713108	0.05
P26232	Catenin alpha-2	CTNNA2	122.09	5.52	617	20.4	31	17	10	1.039	1.064	1.054	0.962	0.943	0.963	6.025	0.908457	0.05
P61978	Heterogeneous nuclear ribonucleoprotein K	HNRNPK	56.5	5.39	1161	38.7	58	16	17	1.088	1.114	1.078	0.909	0.946	0.89	6.025	0.83689	0.05
Q13144	Translation initiation factor eIF-2B subunit epsilon	EIF2B5	88.4	4.98	91	2.9	2	2	2	1.166	1.184	1.219	0.792	0.853	0.811	6.025	0.688148	0.05
Q13263	Transcription intermediary factor 1-beta	TRIM28	100.11	5.52	777	21.2	43	15	16	1.129	1.104	1.133	0.882	0.887	0.89	6.025	0.789958	0.05
Q99497	Protein deglycase DJ-1	PARK7	23.95	6.33	521	34.9	28	7	7	1.107	1.113	1.075	0.911	0.888	0.931	6.025	0.828528	0.05
O43399	Tumor protein D54	TPD52L2	26.18	5.26	353	43.2	14	8	8	1.229	1.227	1.204	0.801	0.769	0.794	6.024	0.645902	0.05
Q9NWB1	RNA binding protein fox-1 homolog 1	RBFOX1	45.39	6.36	157	6.3	3	1	2	1.065	1.147	1.136	0.865	0.884	0.927	6.024	0.799283	0.05
Q96C36	Pyrroline-5-carboxylate reductase 2	PYCR2	38.31	7.66	166	15.6	6	3	4	1.244	1.191	1.29	0.751	0.731	0.817	6.024	0.617181	0.000250906
P22670	MHC class II regulatory factor RFX1	RFX1	111.91	5.89	181	7.6	7	5	6	0.798	0.732	0.767	1.263	1.209	1.255	6.024	1.62255	4.76771e-05
O15212	Prefoldin subunit 6	PFDN6	17.78	8.83	66	14.7	3	2	2	0.839	0.882	0.846	1.137	1.161	1.159	6.024	1.34671	0.05
P36507	Dual specificity mitogen-activated protein kinase kinase 2	MAP2K2	50.41	6.12	64	8	5	3	3	1.136	1.118	1.179	0.876	0.87	0.845	6.024	0.754733	0.05
P36871	Phosphoglucomutase-1	PGM1	70.17	6.3	892	35.6	58	21	21	1.073	1.156	1.125	0.856	0.906	0.908	6.024	0.796064	0.05
P51610	Host cell factor 1	HCFC1	227.56	7.32	153	4.8	10	9	9	1.109	1.067	1.071	0.906	0.947	0.924	6.024	0.855251	0.05
Q96NW7	Leucine-rich repeat-containing protein 7	LRRC7	194.81	6.37	38	1.2	5	3	3	1.063	1.047	0.873	0.989	1.012	1.04	6.024	1.01944	0.783913
Q9HD26	Golgi-associated PDZ and coiled-coil motif-containing protein	GOPC	59.6	5.59	101	6.3	4	3	3	1.108	1.103	1.058	0.896	0.95	0.909	6.024	0.842765	0.05
P42766	60S ribosomal protein L35	RPL35	20.73	11.04	96	18.7	6	3	3	1.1	1.102	1.037	0.943	0.968	0.874	6.024	0.859833	0.05
O76038	Secretagogin	SCGN	37.92	5.25	324	26.4	20	7	6	1.32	1.264	1.284	0.697	0.695	0.763	6.023	0.557135	3.27372e-05
A6NHQ2	rRNA/tRNA 2~-O-methyltransferase fibrillarin-like protein 1	FBLL1	39.65	10.35	193	14.4	10	5	5	1.233	1.168	1.136	0.86	0.827	0.799	6.023	0.702856	0.05
Q13114	TNF receptor-associated factor 3	TRAF3	77.96	8.23	70	7.4	6	4	5	1.083	1.104	1.09	0.905	0.918	0.923	6.023	0.837962	0.05
O00139	Kinesin-like protein KIF2A	KIF2A	92.5	6.28	122	10.5	11	8	9	0.916	0.89	0.917	1.104	1.081	1.115	6.023	1.2119	0.05
O95816	BAG family molecular chaperone regulator 2	BAG2	27.37	6.25	242	32.7	12	8	7	1.164	1.078	1.114	0.896	0.907	0.864	6.023	0.794696	0.05
P13674	Prolyl 4-hydroxylase subunit alpha-1	P4HA1	71.61	5.7	228	9.4	10	4	4	1.226	1.196	1.224	0.842	0.743	0.792	6.023	0.651947	0.05
P19338	Nucleolin	NCL	97.48	4.6	788	19.6	36	13	15	1.184	1.185	1.151	0.833	0.833	0.837	6.023	0.71108	0.05
P23368	NAD-dependent malic enzyme, mitochondrial	ME2	74.05	7.53	711	20.2	36	11	10	0.758	0.798	0.804	1.238	1.181	1.244	6.023	1.55212	0.05
P29218	Inositol monophosphatase 1	IMPA1	34.46	5.16	266	26.4	12	6	7	1.147	1.138	1.109	0.867	0.867	0.895	6.023	0.774602	0.05
P31942	Heterogeneous nuclear ribonucleoprotein H3	HNRNPH3	39.02	6.37	639	25.7	24	7	7	1.063	1.116	1.083	0.896	0.946	0.919	6.023	0.846413	0.05
P42025	Beta-centractin	ACTR1B	47.88	5.98	188	22.3	10	8	4	1.047	1.018	1.061	0.965	0.976	0.956	6.023	0.926743	0.05
P61964	WD repeat-containing protein 5	WDR5	45.39	8.54	126	4.2	4	1	1	1.067	1.043	1.147	0.973	0.908	0.885	6.023	0.849248	0.05
Q96ES7	SAGA-associated factor 29 homolog	CCDC101	38.72	8.2	27	2	3	1	1	1.182	1.234	1.106	0.864	0.829	0.808	6.023	0.710108	0.05
P18428	Lipopolysaccharide-binding protein	LBP	58.79	6.23	39	2.3	2	1	1	1.191	1.197	1.151	0.829	0.813	0.842	6.023	0.701893	0.05
P17174	Aspartate aminotransferase, cytoplasmic	GOT1	51.49	6.52	226	16.7	13	6	6	1.108	1.098	1.035	0.929	0.924	0.928	6.022	0.858068	0.05
Q9NR45	Sialic acid synthase	NANS	48.07	6.29	139	16.2	8	5	5	1.54	1.45	1.51	0.487	0.505	0.53	6.022	0.338222	4.49585e-06
Q8N2S1	Latent-transforming growth factor beta-binding protein 4	LTBP4	185.42	5.27	110	1.5	3	2	2	0.769	0.751	0.753	1.307	1.214	1.228	6.022	1.64936	7.57779e-05
O00483	Cytochrome c oxidase subunit NDUFA4	NDUFA4	11.25	9.42	55	32.1	7	3	3	0.993	0.942	0.938	1.097	0.98	1.072	6.022	1.09607	0.105513
P02746	Complement C1q subcomponent subunit B	C1QB	30.6	8.83	84	8.3	2	2	2	1.229	1.194	1.192	0.86	0.778	0.769	6.022	0.665837	0.05
P10768	S-formylglutathione hydrolase	ESD	37.23	6.54	123	12.8	6	3	3	1.125	1.118	1.201	0.806	0.84	0.932	6.022	0.748548	0.05
P29558	RNA-binding motif, single-stranded-interacting protein 1	RBMS1	49.98	8.91	117	6.2	4	2	2	0.952	0.979	1.038	0.985	1.002	1.066	6.022	1.02829	0.473214
P54725	UV excision repair protein RAD23 homolog A	RAD23A	43.31	4.56	173	19.3	9	6	4	1.126	1.197	1.143	0.874	0.788	0.894	6.022	0.73745	0.05
Q08174	Protocadherin-1	PCDH1	126.24	4.91	50	5.7	3	3	5	1.11	1.049	1.106	0.988	0.914	0.855	6.022	0.84441	0.05
Q5VU97	VWFA and cache domain-containing protein 1	CACHD1	156.17	5.97	135	1.7	4	2	2	1.185	1.094	1.159	0.895	0.843	0.846	6.022	0.7516	0.05
Q96I25	Splicing factor 45	RBM17	53.64	5.76	136	14	8	5	5	0.967	0.947	0.974	1.068	0.998	1.068	6.022	1.08518	0.0595062
Q9UKM7	Endoplasmic reticulum mannosyl-oligosaccharide 1,2-alpha-mannosidase	MAN1B1	88.29	7.38	71	6.7	4	4	4	1.196	1.22	1.255	0.761	0.796	0.794	6.022	0.640425	0.05
O15240	Neurosecretory protein VGF	VGF	70.94	4.76	671	27.3	33	13	14	1.053	1.044	1.08	0.98	0.927	0.938	6.022	0.895499	0.05
O43765	Small glutamine-rich tetratricopeptide repeat-containing protein alpha	SGTA	37.71	4.81	87	8.6	4	3	3	1.178	1.146	1.157	0.866	0.833	0.842	6.022	0.729963	0.05
P31150	Rab GDP dissociation inhibitor alpha	GDI1	58.05	5	1226	40	62	16	8	1.093	1.052	1.035	0.976	0.917	0.949	6.022	0.893711	0.05
Q01433	AMP deaminase 2	AMPD2	111.05	6.46	439	15.9	27	15	16	1.169	1.163	1.156	0.856	0.821	0.857	6.022	0.726491	0.05
Q08J23	tRNA (cytosine(34)-C(5))-methyltransferase	NSUN2	100.51	6.33	171	9.1	11	6	6	1.18	1.188	1.155	0.821	0.83	0.848	6.022	0.709339	0.05
Q93100	Phosphorylase b kinase regulatory subunit beta	PHKB	140.84	6.5	68	4.1	5	4	5	1.047	1.015	1.074	0.975	0.944	0.967	6.022	0.920281	0.05
P01624	Ig kappa chain V-III region POM	P01624	12.72	9.11	43	6.4	3	1	1	1.16	1.201	1.156	0.8	0.839	0.866	6.022	0.712255	0.05
O75976	Carboxypeptidase D	CPD	168.81	5.68	243	8.3	15	11	11	1.207	1.222	1.201	0.798	0.789	0.804	6.021	0.658678	0.05
P02747	Complement C1q subcomponent subunit C	C1QC	28.96	8.61	80	4.9	2	1	1	1.264	1.214	1.123	0.847	0.767	0.806	6.021	0.672036	0.05
P25311	Zinc-alpha-2-glycoprotein	AZGP1	39.28	5.71	76	5.4	5	2	2	1.173	1.197	1.217	0.811	0.809	0.814	6.021	0.678561	0.05
Q9Y3C8	Ubiquitin-fold modifier-conjugating enzyme 1	UFC1	23.05	6.9	38	13.2	2	2	3	1.188	1.29	1.242	0.77	0.757	0.774	6.021	0.618548	9.33726e-05
Q9H598	Vesicular inhibitory amino acid transporter	SLC32A1	63.62	6.19	107	5.3	4	2	2	0.705	0.777	0.77	1.201	1.28	1.288	6.021	1.67362	0.000149113
P28066	Proteasome subunit alpha type-5	PSMA5	29.77	4.74	273	29.9	11	5	5	1.116	1.17	1.063	0.909	0.904	0.859	6.021	0.79785	0.05
P30520	Adenylosuccinate synthetase isozyme 2	ADSS	57.34	6.13	149	12.3	6	4	5	0.959	0.93	0.928	1.123	1.042	1.039	6.021	1.13738	0.05
P57740	Nuclear pore complex protein Nup107	NUP107	119.19	5.28	219	8	11	7	7	1.086	1.098	1.09	0.929	0.903	0.915	6.021	0.839035	0.05
P60228	Eukaryotic translation initiation factor 3 subunit E	EIF3E	58.77	5.71	95	11	5	5	5	1.135	1.072	1.01	0.925	0.908	0.971	6.021	0.87162	0.05
P62312	U6 snRNA-associated Sm-like protein LSm6	LSM6	10.78	9.61	35	33.8	5	3	3	1.158	1.115	1.109	0.884	0.841	0.914	6.021	0.780308	0.05
P62829	60S ribosomal protein L23	RPL23	18.64	10.51	512	37.9	20	4	4	1.036	1.193	1.071	0.847	1.029	0.845	6.021	0.824545	0.0708506
P83731	60S ribosomal protein L24	RPL24	24.3	11.26	67	16.6	4	3	3	1.069	1.185	1.042	0.832	1.024	0.869	6.021	0.82676	0.0653238
Q15075	Early endosome antigen 1	EEA1	203.67	5.55	190	8.5	10	10	11	1.038	1.017	0.998	1.001	0.999	0.968	6.021	0.972159	0.146542
Q15477	Helicase SKI2W	SKIV2L	150.09	5.72	264	8	16	9	8	1.07	1.087	1.112	0.871	0.93	0.951	6.021	0.841848	0.05
Q16720	Plasma membrane calcium-transporting ATPase 3	ATP2B3	152.67	5.45	341	9.1	15	10	4	1.049	0.987	1.035	0.993	0.934	1.023	6.021	0.960599	0.284805
Q3YEC7	Rab-like protein 6	RABL6	91.7	5.11	64	5.1	4	3	4	0.897	0.908	0.879	1.21	1.047	1.08	6.021	1.24329	0.05
Q07065	Cytoskeleton-associated protein 4	CKAP4	75.49	5.63	1337	44.4	57	26	27	1.183	1.172	1.169	0.837	0.813	0.847	6.021	0.70857	0.05
Q9NV96	Cell cycle control protein 50A	TMEM30A	46.1	8.81	54	7.2	3	3	3	1.054	1.009	1.011	0.986	0.954	1.007	6.021	0.958686	0.11772
P30041	Peroxiredoxin-6	PRDX6	29.49	6	397	42.9	29	7	8	1.03	1.03	1.082	0.961	0.956	0.961	6.02	0.915977	0.05
P01597	Ig kappa chain V-I region DEE	P01597	13.37	9.43	161	16.7	6	3	3	1.032	1.131	1.14	0.933	0.876	0.908	6.02	0.822586	0.05
P07919	Cytochrome b-c1 complex subunit 6, mitochondrial	UQCRH	12.39	4.39	55	16.5	3	2	2	1.027	0.859	1.053	1.001	1.148	0.932	6.02	1.04832	0.619457
P08185	Corticosteroid-binding globulin	SERPINA6	49.41	5.64	40	2	2	1	1	1.294	1.15	1.178	0.846	0.761	0.791	6.02	0.662065	0.05
P43652	Afamin	AFM	82.88	5.64	90	11.9	5	5	6	1.178	1.175	1.185	0.856	0.825	0.801	6.02	0.701526	0.05
P61086	Ubiquitin-conjugating enzyme E2 K	UBE2K	25.94	5.33	119	22.5	6	4	4	1.115	1.109	1.085	0.911	0.878	0.922	6.02	0.819281	0.05
Q6PKG0	La-related protein 1	LARP1	143.77	8.91	89	3.9	4	4	4	1.028	1.04	1.012	1.046	0.933	0.961	6.02	0.954545	0.301665
Q8TAC9	Secretory carrier-associated membrane protein 5	SCAMP5	28.66	8.8	116	4.7	4	1	1	1.049	0.963	1.04	0.983	1.014	0.971	6.02	0.972477	0.42499
Q96PK6	RNA-binding protein 14	RBM14	74.2	9.68	295	17.8	22	13	12	1.08	1.09	1.083	0.912	0.91	0.945	6.02	0.850599	0.05
Q99447	Ethanolamine-phosphate cytidylyltransferase	PCYT2	49.08	6.44	140	15.9	8	6	6	1.132	1.099	1.19	0.863	0.844	0.892	6.02	0.759719	0.05
Q9BXP5	Serrate RNA effector molecule homolog	SRRT	117.1	5.7	370	13.5	18	11	11	1.112	1.08	1.062	0.934	0.923	0.909	6.02	0.850031	0.05
Q9P2J5	Leucine--tRNA ligase, cytoplasmic	LARS	161.24	6.95	458	13.9	21	14	15	1.137	1.15	1.078	0.91	0.865	0.88	6.02	0.789004	0.05
Q9UNH6	Sorting nexin-7	SNX7	52.66	5.02	84	9.8	3	3	4	1.044	1.032	1.04	0.991	0.944	0.969	6.02	0.931964	0.05
O15260	Surfeit locus protein 4	SURF4	33.35	7.64	75	6.7	5	2	2	1.231	1.144	1.132	0.777	0.855	0.881	6.02	0.716567	0.05
O43809	Cleavage and polyadenylation specificity factor subunit 5	NUDT21	29.7	8.85	369	22	13	4	5	1.026	0.955	1.017	0.983	1.04	0.999	6.02	1.00801	0.790527
O60716	Catenin delta-1	CTNND1	121.28	5.86	470	18.5	27	18	18	1.056	1.055	1.047	0.935	0.979	0.948	6.02	0.90627	0.05
P43490	Nicotinamide phosphoribosyltransferase	NAMPT	66.77	6.69	322	24.6	20	9	9	1.132	1.129	1.073	0.86	0.957	0.869	6.02	0.805639	0.05
Q96Q11	CCA tRNA nucleotidyltransferase 1, mitochondrial	TRNT1	59.03	8.14	143	20.3	11	9	9	1.085	1.075	1.111	0.921	0.911	0.917	6.02	0.840416	0.05
Q9UBS4	DnaJ homolog subfamily B member 11	DNAJB11	46.73	5.81	125	12.3	6	4	5	1.203	1.147	1.131	0.856	0.824	0.859	6.02	0.729388	0.05
Q14141	Septin-6	SEPT6	60.4	6.24	378	27.6	17	11	3	1.077	1.014	1.145	0.904	0.961	0.918	6.019	0.860012	0.05
O75400	Pre-mRNA-processing factor 40 homolog A	PRPF40A	132.4	7.18	421	10.4	17	10	10	1.037	0.992	1	0.982	1.013	0.995	6.019	0.987124	0.482103
P62879	Guanine nucleotide-binding protein G(I)/G(S)/G(T) subunit beta-2	GNB2	40.11	5.6	326	21.5	16	6	2	1.155	0.992	0.911	0.974	0.951	1.036	6.019	0.96828	0.704892
Q04446	1,4-alpha-glucan-branching enzyme	GBE1	88.9	5.87	193	8.3	8	6	6	1.188	1.194	1.118	0.839	0.848	0.832	6.019	0.719714	0.05
Q15126	Phosphomevalonate kinase	PMVK	24.21	5.56	133	30.2	6	5	5	0.99	1.004	1.003	1.036	0.974	1.012	6.019	1.00834	0.693709
Q16512	Serine/threonine-protein kinase N1	PKN1	114.29	5.99	97	5.7	7	6	4	1.001	0.962	0.965	1.039	1.033	1.019	6.019	1.05567	0.05
Q53H12	Acylglycerol kinase, mitochondrial	AGK	54.67	8.31	141	13.7	11	7	7	0.851	0.888	0.859	1.138	1.146	1.137	6.019	1.31678	0.05
Q86YB8	ERO1-like protein beta	ERO1LB	63.47	8.25	39	4.9	3	3	3	1	1.116	1.015	0.945	0.947	0.996	6.019	0.922389	0.142793
Q92882	Osteoclast-stimulating factor 1	OSTF1	28.07	5.46	37	15	2	2	2	1.234	1.305	1.09	0.81	0.79	0.79	6.019	0.658584	0.05
Q9H832	Ubiquitin-conjugating enzyme E2 Z	UBE2Z	41.39	5.37	53	9.9	2	2	3	1.216	1.093	1.12	0.829	0.894	0.867	6.019	0.755322	0.05
Q9NVP1	ATP-dependent RNA helicase DDX18	DDX18	93.12	9.52	45	3.1	2	2	2	1.272	1.204	1.144	0.851	0.709	0.839	6.019	0.662707	0.05
Q9UNA1	Rho GTPase-activating protein 26	ARHGAP26	106.67	6.2	38	3.1	3	3	3	1.054	1.079	1.03	0.914	0.962	0.98	6.019	0.90294	0.05
P49915	GMP synthase [glutamine-hydrolyzing]	GMPS	88.64	6.42	308	13	16	8	8	1.157	1.156	1.123	0.853	0.847	0.883	6.019	0.751746	0.05
Q86TW2	Uncharacterized aarF domain-containing protein kinase 1	ADCK1	67.98	8.84	97	5.8	4	3	3	0.843	0.828	0.857	1.199	1.121	1.171	6.019	1.38093	0.05
Q8TB61	Adenosine 3~-phospho 5~-phosphosulfate transporter 1	SLC35B2	51.49	9.32	62	6.7	3	3	3	1.109	1.057	1.168	0.909	0.902	0.874	6.019	0.805339	0.05
Q9H1E5	Thioredoxin-related transmembrane protein 4	TMX4	42.48	4.31	86	3.4	3	1	1	0.95	0.947	0.958	1.07	0.98	1.114	6.019	1.10823	0.119645
Q9P2I0	Cleavage and polyadenylation specificity factor subunit 2	CPSF2	102.58	4.98	194	10.1	10	6	8	1.077	1.063	1.089	0.937	0.915	0.938	6.019	0.864045	0.05
Q9Y4E8	Ubiquitin carboxyl-terminal hydrolase 15	USP15	129.87	5.06	151	6.9	7	6	6	1.142	1.137	1.134	0.878	0.87	0.858	6.019	0.763551	0.05
O00422	Histone deacetylase complex subunit SAP18	SAP18	20.59	9.38	126	32.7	9	7	7	1.081	1.06	1.092	0.932	0.926	0.927	6.018	0.861429	0.05
O60832	H/ACA ribonucleoprotein complex subunit 4	DKC1	72.53	9.46	376	23.3	21	10	11	1.096	1.068	1.084	0.925	0.932	0.913	6.018	0.852833	0.05
P02647	Apolipoprotein A-I	APOA1	36.03	5.56	1049	40.4	50	14	13	1.178	1.155	1.193	0.835	0.817	0.84	6.018	0.70675	0.05
P07339	Cathepsin D	CTSD	50.54	6.1	430	20.4	24	8	8	1.145	1.107	1.123	0.903	0.854	0.886	6.018	0.783111	0.05
P35249	Replication factor C subunit 4	RFC4	48.19	8.26	94	11.8	3	3	4	1.277	0.997	1.067	0.841	0.929	0.907	6.018	0.801257	0.108359
Q5QJE6	Deoxynucleotidyltransferase terminal-interacting protein 2	DNTTIP2	102.23	5.86	79	6	3	3	3	1.055	1.062	1.038	0.87	0.973	1.02	6.018	0.907448	0.155988
Q8N490	Probable hydrolase PNKD	PNKD	47.37	9.22	106	6	4	2	2	0.831	0.825	0.836	1.187	1.131	1.208	6.018	1.41493	0.05
P50552	Vasodilator-stimulated phosphoprotein	VASP	44.79	9.05	246	20.3	11	7	7	1.038	1.097	1.085	0.939	0.884	0.975	6.018	0.868944	0.05
P61160	Actin-related protein 2	ACTR2	50.98	6.3	648	27.4	45	9	12	0.992	0.963	0.966	1.047	1.015	1.035	6.018	1.06025	0.05
Q3ZAQ7	Vacuolar ATPase assembly integral membrane protein VMA21	VMA21	12.49	6.56	91	21.8	3	2	2	1.196	1.17	1.049	0.896	0.866	0.841	6.018	0.762225	0.05
Q86TP1	Protein prune homolog	PRUNE	56.75	5.28	144	13	8	5	5	1.073	0.997	1.035	1.001	0.945	0.967	6.018	0.938164	0.0846649
Q92561	Phytanoyl-CoA hydroxylase-interacting protein	PHYHIP	42.24	6.53	32	4.8	2	2	2	1.166	1.144	1.132	0.863	0.888	0.825	6.018	0.748402	0.05
Q9BRK5	45 kDa calcium-binding protein	SDF4	47.16	4.76	435	26.5	19	10	10	1.151	1.112	1.124	0.884	0.882	0.865	6.018	0.776794	0.05
Q9BYI3	Hyccin	FAM126A	65.2	8.45	81	3.8	3	2	2	0.882	0.869	0.98	1.127	1.056	1.104	6.018	1.20359	0.05
Q9Y277	Voltage-dependent anion-selective channel protein 3	VDAC3	37.4	8.85	201	11.3	14	3	4	1.011	1.17	1.107	0.869	0.988	0.873	6.018	0.830292	0.05
Q9Y320	Thioredoxin-related transmembrane protein 2	TMX2	39.17	8.9	112	11.5	3	2	2	1.036	1.089	1.015	0.955	0.97	0.953	6.018	0.916561	0.0510713
Q9Y487	V-type proton ATPase 116 kDa subunit a isoform 2	ATP6V0A2	108.73	6.18	26	1.8	2	2	2	1.172	1.26	1.148	0.784	0.814	0.84	6.018	0.681006	0.05
P47972	Neuronal pentraxin-2	NPTX2	51.77	5.45	28	3.5	2	2	2	1.378	1.291	1.269	0.738	0.657	0.684	6.017	0.527933	0.000110851
A2RU67	Uncharacterized protein KIAA1467	KIAA1467	72.49	4.88	84	3.4	2	2	2	1.215	1.084	1.189	0.816	0.817	0.896	6.017	0.725057	0.05
O60218	Aldo-keto reductase family 1 member B10	AKR1B10	44.02	7.67	59	12	5	4	3	1.091	1.245	0.936	0.932	1.049	0.764	6.017	0.838936	0.222602
O75934	Pre-mRNA-splicing factor SPF27	BCAS2	29.21	5.48	195	20.9	7	4	5	1.02	1.002	0.957	1.009	1.007	1.022	6.017	1.01981	0.405345
P00568	Adenylate kinase isoenzyme 1	AK1	26.32	8.73	395	23.2	19	5	5	1.118	1.082	1.129	0.878	0.895	0.915	6.017	0.80745	0.05
P02748	Complement component C9	C9	73.32	5.43	99	6.6	6	4	4	1.254	1.198	1.163	0.803	0.808	0.791	6.017	0.664454	0.05
P55327	Tumor protein D52	TPD52	29.41	4.79	85	12.5	3	2	3	1.292	1.184	1.077	0.877	0.751	0.836	6.017	0.693498	0.05
Q07020	60S ribosomal protein L18	RPL18	26.32	11.73	134	16.5	5	3	3	1.094	1.086	1.077	0.962	0.876	0.922	6.017	0.847406	0.05
Q13642	Four and a half LIM domains protein 1	FHL1	46.94	9.25	191	3.7	5	1	1	1.036	1.029	1.103	0.945	0.965	0.939	6.017	0.899306	0.05
Q9BS40	Latexin	LXN	29.52	5.54	105	13.5	8	4	4	0.905	0.9	0.918	1.089	1.107	1.098	6.017	1.2097	0.05
Q9BSL1	Ubiquitin-associated domain-containing protein 1	UBAC1	51.95	4.82	55	7.2	4	3	3	1.064	1.004	1.072	0.954	0.989	0.934	6.017	0.916242	0.05
P13671	Complement component C6	C6	123.72	6.39	38	1.7	3	2	2	1.365	1.346	1.333	0.632	0.677	0.664	6.017	0.487883	1.84996e-06
Q8TCT9	Minor histocompatibility antigen H13	HM13	46.33	6.01	309	20.2	16	7	7	1.305	1.287	1.252	0.721	0.725	0.727	6.017	0.565297	3.72877e-06
O43396	Thioredoxin-like protein 1	TXNL1	36.98	4.84	427	30.8	16	6	6	1.048	1.025	1.053	0.952	0.963	0.976	6.017	0.924824	0.05
P04406	Glyceraldehyde-3-phosphate dehydrogenase	GAPDH	42.39	8.57	2001	37.9	90	11	11	1.007	1.146	1.201	0.815	0.935	0.913	6.017	0.793977	0.05
P07737	Profilin-1	PFN1	17.74	8.44	492	42.1	21	5	5	1.09	1.103	1.108	0.895	0.894	0.927	6.017	0.822781	0.05
P20618	Proteasome subunit beta type-1	PSMB1	29.91	8.27	159	16.2	10	4	4	0.985	1.083	1.057	0.997	0.92	0.975	6.017	0.92544	0.109118
P62701	40S ribosomal protein S4, X isoform	RPS4X	36.22	10.16	663	36.9	39	11	7	1.024	1.207	1.007	0.891	1.059	0.829	6.017	0.858246	0.178955
Q14690	Protein RRP5 homolog	PDCD11	250.04	8.99	44	1.8	2	2	3	1.178	1.077	1.144	0.869	0.885	0.864	6.017	0.770227	0.05
Q15631	Translin	TSN	29.72	6.01	82	18	6	4	4	1.144	1.167	1.136	0.861	0.851	0.858	6.017	0.745576	0.05
P00751	Complement factor B	CFB	99.22	6.67	341	15.1	18	12	14	1.237	1.163	1.222	0.802	0.791	0.801	6.016	0.660961	0.05
P43243	Matrin-3	MATR3	110.43	5.87	542	17.5	29	14	16	1.06	1.096	1.04	0.914	0.969	0.937	6.016	0.882353	0.05
P49591	Serine--tRNA ligase, cytoplasmic	SARS	69.8	6.05	211	18.3	14	10	10	1.103	1.083	1.067	0.9	0.9	0.963	6.016	0.84937	0.05
Q9NT22	EMILIN-3	EMILIN3	88.2	7.84	92	8	5	5	5	1.457	1.404	1.45	0.541	0.579	0.585	6.016	0.3955	2.27998e-06
Q99805	Transmembrane 9 superfamily member 2	TM9SF2	85.29	7.23	146	4.2	6	4	4	1.26	1.3	1.285	0.711	0.741	0.719	6.016	0.564629	2.88896e-06
P25787	Proteasome subunit alpha type-2	PSMA2	29.43	6.92	183	22.2	9	5	6	1.132	1.115	1.142	0.869	0.882	0.876	6.016	0.775155	0.05
P61266	Syntaxin-1B	STX1B	39.64	5.25	313	31.6	16	10	8	0.959	0.94	0.942	1.055	1.075	1.045	6.016	1.11756	0.05
Q13409	Cytoplasmic dynein 1 intermediate chain 2	DYNC1I2	81.21	5.08	491	15.2	18	9	9	1.01	0.982	1	1.004	1.003	1.017	6.016	1.0107	0.33417
Q9BXF6	Rab11 family-interacting protein 5	RAB11FIP5	80.45	9.28	86	5.2	3	3	3	1.046	0.917	0.982	1.011	1.023	1.037	6.016	1.04278	0.376653
Q9H299	SH3 domain-binding glutamic acid-rich-like protein 3	SH3BGRL3	11.63	4.82	368	47.3	20	5	5	0.955	0.932	0.92	1.096	1.05	1.063	6.016	1.14321	0.05
Q9H6Z4	Ran-binding protein 3	RANBP3	67.39	4.7	91	4.1	3	2	2	1.246	1.161	1.174	0.851	0.824	0.76	6.016	0.679978	0.05
Q9P2T1	GMP reductase 2	GMPR2	44.32	6.79	40	9.2	3	3	3	1.145	1.172	1.142	0.85	0.851	0.856	6.016	0.739231	0.05
Q9UBF2	Coatomer subunit gamma-2	COPG2	110.62	5.56	283	11.8	13	8	5	0.959	0.959	0.983	1.032	1.042	1.041	6.016	1.07377	0.05
Q9Y276	Mitochondrial chaperone BCS1	BCS1L	50.42	8.63	155	11.5	9	4	4	0.865	0.862	0.915	1.154	1.053	1.167	6.016	1.27706	0.05
P31946	14-3-3 protein beta/alpha	YWHAB	32.99	4.76	740	60.2	48	14	6	1.04	0.97	1.026	0.983	0.973	1.024	6.016	0.981555	0.523003
P00747	Plasminogen	PLG	104.7	7.04	399	15.8	27	12	14	1.157	1.128	1.107	0.875	0.878	0.87	6.015	0.77329	0.05
P15170	Eukaryotic peptide chain release factor GTP-binding subunit ERF3A	GSPT1	66.89	5.45	138	12.2	13	6	7	1.129	1.125	1.092	0.855	0.951	0.863	6.015	0.797669	0.05
P29353	SHC-transforming protein 1	Src	68.34	6.01	41	4.8	2	2	3	1.147	1.122	1.18	0.876	0.828	0.862	6.015	0.743984	0.05
P41227	N-alpha-acetyltransferase 10	NAA10	30.51	5.41	155	20.4	5	4	4	1.064	1.139	1.097	0.916	0.912	0.887	6.015	0.822727	0.05
P54652	Heat shock-related 70 kDa protein 2	HSPA2	82.41	5.56	1764	36.2	81	22	10	1.072	1.092	1.125	0.888	0.912	0.926	6.015	0.828823	0.05
Q08211	ATP-dependent RNA helicase A	DHX9	157.31	6.41	1308	17.5	57	19	21	1.022	1.026	1.005	0.99	0.976	0.996	6.015	0.970193	0.05
Q9HCE5	N6-adenosine-methyltransferase subunit METTL14	METTL14	59.1	5.89	58	5.5	2	2	2	1.165	1.081	1.158	0.868	0.872	0.871	6.015	0.767039	0.05
Q9NQ48	Leucine zipper transcription factor-like protein 1	LZTFL1	42.19	5.3	440	38.1	19	9	10	1.216	1.173	1.211	0.802	0.795	0.818	6.015	0.670833	0.05
Q9UEU0	Vesicle transport through interaction with t-SNAREs homolog 1B	VTI1B	30.34	9.02	122	14.7	5	3	3	0.96	0.981	1.017	1.034	1.003	1.02	6.015	1.03347	0.177101
Q9Y5V3	Melanoma-associated antigen D1	MAGED1	94.47	5.64	100	5.4	6	4	3	1.122	1.088	1.092	0.908	0.879	0.926	6.015	0.821623	0.05
P48723	Heat shock 70 kDa protein 13	HSPA13	58.83	5.52	199	16.6	9	7	7	1.257	1.264	1.221	0.749	0.726	0.798	6.015	0.607429	4.04788e-05
Q01955	Collagen alpha-3(IV) chain	COL4A3	183.7	9.28	67	1.4	4	3	3	0.478	0.658	0.546	1.438	1.425	1.47	6.015	2.5761	8.25456e-05
O60641	Clathrin coat assembly protein AP180	SNAP91	101.61	4.69	181	4.6	11	5	4	0.998	0.989	1.01	1.01	1.035	0.973	6.015	1.00701	0.74213
P11234	Ras-related protein Ral-B	RALB	29.01	6.24	41	19.9	4	3	3	1.074	1.054	1.084	0.913	0.976	0.914	6.015	0.872665	0.05
P61513	60S ribosomal protein L37a	RPL37A	14.16	10.44	108	51.1	6	4	4	1.061	1.14	1.101	0.845	1.024	0.844	6.015	0.821623	0.0669683
Q08209	Serine/threonine-protein phosphatase 2B catalytic subunit alpha isoform	PPP3CA	66.44	5.58	198	13.6	13	8	5	1.055	1.064	1.024	0.946	1.017	0.909	6.015	0.913777	0.0896683
Q86YS7	C2 domain-containing protein 5	C2CD5	124.29	5.47	171	6.3	10	6	7	0.991	1.058	0.97	0.991	0.992	1.013	6.015	0.992382	0.803512
Q8NE71	ATP-binding cassette sub-family F member 1	ABCF1	119.7	6.4	278	11.7	11	9	8	1.143	1.031	1.104	0.922	0.933	0.882	6.015	0.83496	0.05
Q9H0A0	N-acetyltransferase 10	NAT10	133.53	8.5	64	4.2	4	4	4	1.133	1.106	1.107	0.942	0.821	0.906	6.015	0.797669	0.05
Q9ULU8	Calcium-dependent secretion activator 1	CADPS	174.4	5.5	445	10.9	23	13	11	1.222	1.2	1.148	0.824	0.809	0.812	6.015	0.684874	0.05
Q9Y2P8	RNA 3~-terminal phosphate cyclase-like protein	RCL1	46.77	9.36	56	6.2	2	2	2	1.24	1.11	1.234	0.873	0.758	0.8	6.015	0.678292	0.05
P32754	4-hydroxyphenylpyruvate dioxygenase	HPD	52.87	6.52	275	6.4	9	2	2	1.376	0.941	1.001	1.156	0.736	0.805	6.015	0.812839	0.333333
O95810	Serum deprivation-response protein	SDPR	56.14	5.14	138	15.3	7	6	6	1.002	0.996	1.04	0.985	0.942	1.049	6.014	0.979592	0.589703
Q8IZL8	Proline-, glutamic acid- and leucine-rich protein 1	PELP1	125.69	4.29	101	6.5	5	5	5	1.027	1.061	0.995	1.043	0.911	0.977	6.014	0.950697	0.321424
Q8NI08	Nuclear receptor coactivator 7	NCOA7	128.26	5.43	78	2.1	2	2	2	1.189	1.059	1.161	0.904	0.916	0.785	6.014	0.764154	0.05
Q9Y3Z3	Deoxynucleoside triphosphate triphosphohydrolase SAMHD1	SAMHD1	83.67	6.69	480	17.7	21	10	10	1.265	1.277	1.194	0.761	0.735	0.782	6.014	0.609743	7.68577e-05
P27635	60S ribosomal protein L10	RPL10	30.54	10.11	157	25.2	10	6	6	1.101	1.152	1.067	0.901	0.905	0.888	6.014	0.811446	0.05
Q00341	Vigilin	HDLBP	167.2	6.43	578	16.8	33	21	22	1.108	1.185	1.084	0.852	0.941	0.844	6.014	0.780871	0.05
Q13200	26S proteasome non-ATPase regulatory subunit 2	PSMD2	112.79	5.08	503	20.4	34	18	18	1.083	1.088	1.087	0.908	0.927	0.921	6.014	0.845918	0.05
Q13619	Cullin-4A	CUL4A	104.18	8.29	268	10.4	17	9	4	1.215	1.217	1.255	0.767	0.77	0.79	6.014	0.631136	0.05
Q9H993	Protein-glutamate O-methyltransferase	ARMT1	58.87	5.48	89	2.3	3	1	1	1.258	1.163	1.148	0.812	0.789	0.844	6.014	0.685066	0.05
Q9UI14	Prenylated Rab acceptor protein 1	RABAC1	21.95	6.82	53	8.1	2	1	1	1.08	1.161	1.159	0.837	0.896	0.881	6.014	0.768824	0.05
O15047	Histone-lysine N-methyltransferase SETD1A	SETD1A	204.36	5.07	66	2.3	3	3	3	1.11	1.035	1.174	0.882	0.926	0.887	6.014	0.811992	0.05
O76031	ATP-dependent Clp protease ATP-binding subunit clpX-like, mitochondrial	CLPX	80.92	7.51	323	11.1	11	6	6	0.964	0.964	1.004	1.027	0.983	1.072	6.014	1.05116	0.182425
O95487	Protein transport protein Sec24B	SEC24B	147.69	6.19	173	4.3	7	4	4	1.046	1.012	0.97	0.994	1.045	0.947	6.014	0.986129	0.717075
P09601	Heme oxygenase 1	HMOX1	36.69	7.88	194	26.4	8	6	6	1.072	1.148	1.079	0.869	0.962	0.884	6.014	0.822977	0.05
Q9NTZ6	RNA-binding protein 12	RBM12	106.73	8.74	127	5.4	7	5	5	1.153	1.186	1.219	0.815	0.852	0.789	6.014	0.690275	0.05
Q9NVR2	Integrator complex subunit 10	INTS10	93.29	7.24	49	3.9	4	3	3	1.04	1.107	1.127	0.922	0.901	0.917	6.014	0.836897	0.05
Q9Y2J2	Band 4.1-like protein 3	EPB41L3	138.65	5.09	635	21.8	36	20	17	1.089	1.052	1.055	0.939	0.941	0.938	6.014	0.881727	0.05
Q03701	CCAAT/enhancer-binding protein zeta	CEBPZ	148.11	5.65	44	1.6	2	2	2	1.131	1.161	1.143	0.866	0.855	0.858	6.014	0.750801	0.05
Q9BZE4	Nucleolar GTP-binding protein 1	GTPBP4	90.36	9.52	194	10.4	9	6	6	1.291	1.387	1.325	0.712	0.65	0.648	6.013	0.502123	4.58319e-05
Q86WR0	Coiled-coil domain-containing protein 25	CCDC25	30.82	6.34	29	10.1	3	3	3	1.315	1.177	1.294	0.718	0.774	0.735	6.013	0.58822	0.000350463
O15069	NAC-alpha domain-containing protein 1	NACAD	171.37	4.12	123	3.3	5	3	4	1.105	1.074	1.06	0.908	0.94	0.926	6.013	0.856437	0.05
P05386	60S acidic ribosomal protein P1	RPLP1	13.45	4.26	271	14	7	1	1	0.97	1.298	1.028	0.824	1.121	0.772	6.013	0.824333	0.263706
P53004	Biliverdin reductase A	BLVRA	39.19	6.06	231	16.6	8	5	5	0.923	0.914	0.881	1.12	1.062	1.113	6.013	1.21229	0.05
P62851	40S ribosomal protein S25	RPS25	20.21	10.12	95	16.8	4	3	3	1.091	1.228	1.019	0.856	1.044	0.775	6.013	0.801378	0.0972736
P78527	DNA-dependent protein kinase catalytic subunit	PRKDC	537.23	6.75	1845	15.7	100	57	61	1.058	1.044	1.038	0.954	0.944	0.975	6.013	0.914968	0.05
Q01581	Hydroxymethylglutaryl-CoA synthase, cytoplasmic	HMGCS1	64.7	5.22	106	6.3	5	3	3	1.104	1.023	0.998	1.024	0.936	0.928	6.013	0.92416	0.149753
Q0ZGT2	Nexilin	NEXN	99.63	5.31	112	5.8	5	4	4	0.945	0.953	0.902	1.159	0.973	1.081	6.013	1.1475	0.115599
Q12802	A-kinase anchor protein 13	AKAP13	354.38	5.12	93	1.5	4	4	4	1.118	1.097	1.118	0.901	0.859	0.92	6.013	0.80408	0.05
Q14677	Clathrin interactor 1	CLINT1	77.67	6.01	403	16.6	16	9	9	1.143	1.167	1.17	0.86	0.825	0.848	6.013	0.727874	0.05
Q9H0U6	39S ribosomal protein L18, mitochondrial	MRPL18	22.4	9.63	114	12.2	3	2	2	1.089	1.064	0.956	1.038	0.936	0.93	6.013	0.934062	0.274277
Q9Y333	U6 snRNA-associated Sm-like protein LSm2	LSM2	13	6.04	44	33.7	2	2	3	1.138	1.178	1.081	0.836	0.934	0.846	6.013	0.770091	0.05
Q15014	Mortality factor 4-like protein 2	MORF4L2	39.45	9.72	70	8	3	2	2	1.158	1.085	1.099	0.861	0.901	0.909	6.013	0.799222	0.05
Q32MZ4	Leucine-rich repeat flightless-interacting protein 1	LRRFIP1	105.18	4.59	184	9.9	8	7	7	1.105	1.022	1.042	0.943	0.934	0.967	6.013	0.897444	0.05
Q9H2M9	Rab3 GTPase-activating protein non-catalytic subunit	RAB3GAP2	178.34	5.4	315	11.9	17	15	15	1.139	1.137	1.16	0.845	0.858	0.874	6.013	0.75	0.05
P01009	Alpha-1-antitrypsin	SERPINA1	54.9	5.37	477	27.8	30	10	11	1.096	1.068	1.083	0.946	0.908	0.911	6.012	0.851555	0.05
P55072	Transitional endoplasmic reticulum ATPase	VCP	100.95	5.14	1677	40.3	86	27	27	1.107	1.159	1.087	0.865	0.934	0.86	6.012	0.793021	0.05
Q12905	Interleukin enhancer-binding factor 2	ILF2	47.39	5.19	319	27.2	18	11	11	1.113	1.13	1.084	0.9	0.871	0.914	6.012	0.807033	0.05
Q99567	Nuclear pore complex protein Nup88	NUP88	95.4	5.47	195	9	11	6	7	1.083	0.991	1.029	0.935	1.021	0.953	6.012	0.93748	0.158822
Q9UID3	Vacuolar protein sorting-associated protein 51 homolog	VPS51	93.09	6.06	66	5.1	3	3	3	1.013	1.107	1.052	0.914	0.966	0.96	6.012	0.895334	0.05
Q9Y2S0	DNA-directed RNA polymerases I and III subunit RPAC2	POLR1D	17.69	5.55	63	24.1	3	3	3	1.165	1.103	1.176	0.838	0.892	0.838	6.012	0.745645	0.05
P08174	Complement decay-accelerating factor	CD55	46.98	7.79	108	5.2	7	2	2	1.397	1.326	1.211	0.73	0.64	0.708	6.012	0.528216	0.000518227
A6NGU5	Putative gamma-glutamyltranspeptidase 3	GGT3P	66.96	6.68	151	6.5	4	3	3	0.674	0.785	0.809	1.224	1.196	1.324	6.012	1.65079	0.000984375
O15031	Plexin-B2	PLXNB2	227.9	5.85	260	7.5	15	12	14	1.051	1.034	1.012	0.977	0.943	0.995	6.012	0.941233	0.05
O15355	Protein phosphatase 1G	PPM1G	68.17	4.28	155	12.3	8	5	6	1.13	1.151	1.136	0.882	0.849	0.864	6.012	0.759438	0.05
Q13618	Cullin-3	CUL3	103.42	8.68	437	16	21	12	12	1.081	1.047	1.022	0.949	0.938	0.975	6.012	0.908571	0.05
Q13952	Nuclear transcription factor Y subunit gamma	NFYC	53.77	5.78	54	4.4	3	2	3	1.007	0.966	1.006	1.011	0.999	1.023	6.012	1.01813	0.32138
Q8TF42	Ubiquitin-associated and SH3 domain-containing protein B	UBASH3B	81.35	6.48	69	5.9	4	3	4	0.905	0.823	0.903	1.14	1.098	1.143	6.012	1.28506	0.05
Q92905	COP9 signalosome complex subunit 5	COPS5	43.97	6.1	61	10.2	3	3	3	1.19	1.185	1.2	0.803	0.805	0.829	6.012	0.681678	0.05
Q93008	Probable ubiquitin carboxyl-terminal hydrolase FAF-X	USP9X	326.22	5.52	322	5.2	16	13	13	0.995	0.989	1.029	0.998	0.994	1.007	6.012	0.995353	0.749663
Q96N66	Lysophospholipid acyltransferase 7	MBOAT7	56.62	9.17	141	7.2	6	3	5	0.944	0.937	0.925	1.041	1.086	1.079	6.012	1.14255	0.05
Q9UBV2	Protein sel-1 homolog 1	SEL1L	97.69	5.23	221	11.1	11	6	6	1.032	1.022	1.021	0.978	0.965	0.994	6.012	0.955122	0.05
P0CG05	Ig lambda-2 chain C regions	IGLC2	13.52	6.92	873	55.7	29	5	2	1.24	1.29	1.265	0.724	0.748	0.744	6.011	0.583926	5.39185e-06
O00299	Chloride intracellular channel protein 1	CLIC1	31.6	5.09	235	17	10	4	4	1.146	1.1	1.011	0.958	0.88	0.916	6.011	0.845563	0.05
O15321	Transmembrane 9 superfamily member 1	TM9SF1	72.54	6.7	118	8.1	8	5	5	1.123	1.123	1.165	0.86	0.878	0.862	6.011	0.76224	0.05
O43813	LanC-like protein 1	LANCL1	51.27	7.86	100	4.5	4	2	2	1.084	1.073	1.086	0.973	0.871	0.924	6.011	0.853531	0.05
O75113	NEDD4-binding protein 1	N4BP1	112.92	5.24	70	2.6	3	2	2	0.93	0.907	1.132	0.95	1.061	1.031	6.011	1.02459	0.778823
O94776	Metastasis-associated protein MTA2	MTA2	85.8	9.7	109	9.3	8	7	7	1.177	1.178	1.19	0.806	0.831	0.829	6.011	0.695628	0.05
P62249	40S ribosomal protein S16	RPS16	20.45	10.21	369	43.8	21	7	7	1.036	1.197	1.045	0.865	1.032	0.836	6.011	0.83374	0.0882384
Q15043	Zinc transporter ZIP14	SLC39A14	59.04	5.16	57	4.5	2	1	2	1.174	1.092	1.151	0.857	0.872	0.865	6.011	0.759145	0.05
Q587I9	Vesicle transport protein SFT2C	SFT2D3	23.21	9.96	76	7	2	1	1	1.138	1.185	1.21	0.895	0.763	0.82	6.011	0.701387	0.05
Q6PIJ6	F-box only protein 38	FBXO38	149.72	5.92	52	1.4	2	2	2	1.152	1.099	1.134	0.892	0.869	0.865	6.011	0.775775	0.05
Q8IZ81	ELMO domain-containing protein 2	ELMOD2	41.41	8.11	136	19.5	8	5	5	0.953	1.049	1.049	0.961	0.988	1.011	6.011	0.970174	0.455647
Q8WVM8	Sec1 family domain-containing protein 1	SCFD1	82.99	5.89	346	23.8	22	14	14	1.178	1.105	1.119	0.857	0.885	0.867	6.011	0.766902	0.05
Q9NR09	Baculoviral IAP repeat-containing protein 6	BIRC6	588.21	5.67	41	0.7	4	4	4	1.085	1.02	1.067	0.963	0.934	0.942	6.011	0.895019	0.05
Q9Y5E4	Protocadherin beta-5	PCDHB5	92.78	4.87	34	1	2	1	1	1.013	1.226	1.087	0.819	1.006	0.86	6.011	0.807276	0.0650522
Q9NW13	RNA-binding protein 28	RBM28	110.26	9.26	68	4.2	3	3	3	1.267	1.213	1.224	0.8	0.782	0.725	6.011	0.62284	7.6275e-05
P49588	Alanine--tRNA ligase, cytoplasmic	AARS	122.84	5.34	587	15	27	13	14	1.079	1.089	1.089	0.91	0.927	0.917	6.011	0.845563	0.05
Q02790	Peptidyl-prolyl cis-trans isomerase FKBP4	FKBP4	62.37	5.35	386	28.3	21	13	13	1.152	1.193	1.138	0.852	0.834	0.842	6.011	0.725811	0.05
Q2TAY7	WD40 repeat-containing protein SMU1	SMU1	65.7	6.74	249	13.1	13	6	7	1.022	0.972	1.001	0.954	1.007	1.055	6.011	1.00701	0.843916
Q8NCB2	CaM kinase-like vesicle-associated protein	CAMKV	62.68	5.38	80	8.8	5	5	5	1.111	1.139	1.099	0.872	0.94	0.85	6.011	0.794864	0.05
Q9H3S7	Tyrosine-protein phosphatase non-receptor type 23	PTPN23	196.79	6.45	209	7.1	15	12	12	1.042	1.005	1.023	0.985	0.952	1.004	6.011	0.95798	0.0890876
Q9H9B1	Histone-lysine N-methyltransferase EHMT1	EHMT1	161.87	5.5	52	2.9	3	3	3	1.085	1.087	1.176	0.871	0.852	0.94	6.011	0.7954	0.05
Q8WVV9	Heterogeneous nuclear ribonucleoprotein L-like	HNRNPLL	68.46	7.83	145	9	6	4	4	1.082	1.06	1.054	0.971	0.932	0.911	6.01	0.880476	0.05
Q8ND24	RING finger protein 214	RNF214	90.28	6.51	101	3	3	2	2	1.071	0.931	1.038	0.992	0.996	0.982	6.01	0.976974	0.636871
Q8WUY1	Protein THEM6	THEM6	24.59	9.71	92	16.3	7	5	5	0.966	0.954	0.96	0.99	1.078	1.062	6.01	1.08681	0.0889449
P01768	Ig heavy chain V-III region CAM	P01768	14.92	9.65	105	27.9	4	3	3	1.171	1.03	1.016	1.022	0.854	0.917	6.01	0.8682	0.112323
P05387	60S acidic ribosomal protein P2	RPLP2	14.18	4.42	190	50.4	5	3	3	1.095	1.011	1.049	0.96	0.944	0.951	6.01	0.904913	0.05
P08758	Annexin A5	ANXA5	41.24	4.94	806	33.4	50	11	12	1.093	1.126	1.109	0.896	0.883	0.903	6.01	0.805889	0.05
P37840	Alpha-synuclein	SNCA	18.12	4.67	569	47.9	15	5	4	1.146	1.061	1.105	0.896	0.901	0.901	6.01	0.814614	0.05
P61009	Signal peptidase complex subunit 3	SPCS3	23.11	8.67	82	11.7	4	2	2	1.17	1.233	1.094	0.809	0.915	0.789	6.01	0.718616	0.05
P82673	28S ribosomal protein S35, mitochondrial	MRPS35	44.21	8.4	73	10.5	3	3	4	1.012	1.02	1.048	1.061	0.866	1.003	6.01	0.951299	0.479723
Q14103	Heterogeneous nuclear ribonucleoprotein D0	HNRNPD	46.14	7.62	241	21.1	16	9	7	1.039	1.025	1.029	1.021	0.939	0.957	6.01	0.943097	0.138886
Q15291	Retinoblastoma-binding protein 5	RBBP5	68.97	4.96	54	3.5	2	1	2	1.062	1.106	1.192	0.861	0.933	0.856	6.01	0.78869	0.05
Q5VTR2	E3 ubiquitin-protein ligase BRE1A	RNF20	138.05	5.73	263	10.2	11	10	10	1.14	1.13	1.093	0.902	0.864	0.881	6.01	0.787095	0.05
Q7L0J3	Synaptic vesicle glycoprotein 2A	SV2A	89.63	5.37	171	8.2	10	6	6	1.131	1.105	1.105	0.897	0.889	0.883	6.01	0.798863	0.05
Q9NRF8	CTP synthase 2	CTPS2	75.03	6.45	123	7.8	6	5	5	0.933	0.873	0.892	1.148	1.072	1.092	6.01	1.22758	0.05
Q9NSD9	Phenylalanine--tRNA ligase beta subunit	FARSB	77.47	6.4	349	20.4	22	11	12	1.133	1.124	1.094	0.886	0.898	0.875	6.01	0.793494	0.05
P63241	Eukaryotic translation initiation factor 5A-1	EIF5A	20.26	5.08	266	45.5	21	5	5	1.108	1.178	1.093	0.843	0.943	0.845	6.01	0.778633	0.05
Q6P2Q9	Pre-mRNA-processing-splicing factor 8	PRPF8	309.8	8.95	874	13.7	47	28	31	1.028	1.022	1.015	0.975	0.97	1	6.01	0.960848	0.05
P52888	Thimet oligopeptidase	THOP1	88.64	5.72	161	10.3	9	7	7	1.106	1.097	1.083	0.921	0.886	0.916	6.009	0.828667	0.05
Q14240	Eukaryotic initiation factor 4A-II	EIF4A2	51.87	5.33	853	39.6	53	19	8	1.088	1.099	1.038	0.937	0.947	0.9	6.009	0.863256	0.05
O43301	Heat shock 70 kDa protein 12A	HSPA12A	85.99	6.32	102	7.9	5	4	4	0.855	0.873	0.974	1.137	1.063	1.107	6.009	1.22391	0.05
P08603	Complement factor H	CFH	162.24	6.21	289	6.5	15	8	6	1.15	1.185	1.159	0.841	0.819	0.855	6.009	0.719805	0.05
P13929	Beta-enolase	ENO3	56.01	7.59	1245	28.3	53	9	3	1.076	1.228	1.049	0.882	0.977	0.797	6.009	0.792126	0.05
P51693	Amyloid-like protein 1	APLP1	76.25	5.54	98	6.5	5	4	3	0.97	1.035	1.039	0.95	0.995	1.02	6.009	0.974047	0.434528
P52788	Spermine synthase	SMS	48.12	4.87	51	10.4	4	4	5	1.129	1.098	1.147	0.874	0.879	0.882	6.009	0.780972	0.05
P62805	Histone H4	HIST1H4A	14.11	11.36	2329	58.3	122	8	8	1.107	1.18	1.049	0.905	0.919	0.849	6.009	0.801259	0.05
Q14C86	GTPase-activating protein and VPS9 domain-containing protein 1	GAPVD1	183.09	5.09	108	4.2	6	6	6	1.113	1.09	1.075	0.926	0.858	0.947	6.009	0.83313	0.05
Q15020	Squamous cell carcinoma antigen recognized by T-cells 3	SART3	127.68	5.45	266	9.4	15	9	8	1.198	1.169	1.159	0.839	0.805	0.839	6.009	0.704197	0.05
Q15843	NEDD8	NEDD8	11.36	7.98	45	32.1	7	3	3	1.067	1.02	1.059	0.928	0.987	0.948	6.009	0.910045	0.05
Q9P0I2	ER membrane protein complex subunit 3	EMC3	34.06	6.33	51	10.7	4	3	3	0.955	0.998	1.067	0.997	0.948	1.044	6.009	0.989735	0.821403
Q9UJU6	Drebrin-like protein	DBNL	53.05	5.02	470	24.4	16	9	9	0.939	0.885	0.887	1.122	1.063	1.113	6.009	1.21653	0.05
Q9UNZ2	NSFL1 cofactor p47	NSFL1C	44.67	4.99	543	43.5	27	13	13	1.031	1.054	1.02	0.955	0.969	0.98	6.009	0.935266	0.05
O60568	Procollagen-lysine,2-oxoglutarate 5-dioxygenase 3	PLOD3	91.26	5.69	151	8.3	7	6	6	1.096	1.137	1.219	0.842	0.87	0.845	6.009	0.74073	0.05
P32856	Syntaxin-2	STX2	39.56	5.92	88	11.5	3	3	3	1.052	1.028	1.008	1.029	0.922	0.97	6.009	0.94592	0.206302
P45877	Peptidyl-prolyl cis-trans isomerase C	PPIC	26.76	8.48	288	6.1	8	1	1	1.046	1.254	0.989	0.853	1.069	0.798	6.009	0.826999	0.17577
Q92621	Nuclear pore complex protein Nup205	NUP205	251.03	5.81	295	6.3	19	14	14	1.078	1.062	1.062	0.938	0.935	0.934	6.009	0.87664	0.05
Q96BW1	Uracil phosphoribosyltransferase homolog	UPRT	37.66	5.71	42	6.8	2	2	2	1.184	1.093	1.082	0.885	0.877	0.888	6.009	0.788925	0.05
Q96GD0	Pyridoxal phosphate phosphatase	PDXP	32.99	6.12	160	19.9	8	5	5	1.095	1.109	1.071	0.925	0.893	0.916	6.009	0.834809	0.05
Q9BZV1	UBX domain-containing protein 6	UBXN6	57.8	6.46	87	12.7	4	4	5	1.029	0.978	0.999	1.021	0.99	0.992	6.009	0.999002	0.958407
Q9H2P9	Diphthine methyl ester synthase	DPH5	35.64	5.19	42	9.5	2	2	2	1.166	1.089	1.125	0.904	0.839	0.886	6.009	0.777811	0.05
P84243	Histone H3.3	H3F3A	18.58	11.27	447	55.9	79	8	2	1.114	1.093	1.148	0.858	0.962	0.834	6.009	0.791058	0.05
O15127	Secretory carrier-associated membrane protein 2	SCAMP2	38.69	5.73	126	9.4	4	3	3	0.966	0.928	0.999	1.031	1.014	1.07	6.008	1.07674	0.0509717
O95372	Acyl-protein thioesterase 2	LYPLA2	27.81	6.75	87	13	5	3	4	1.105	1.06	1.15	0.912	0.881	0.9	6.008	0.812368	0.05
P35914	Hydroxymethylglutaryl-CoA lyase, mitochondrial	HMGCL	40.29	8.81	120	20.3	6	4	7	0.921	0.894	0.929	1.059	1.129	1.076	6.008	1.1895	0.05
Q86UV5	Ubiquitin carboxyl-terminal hydrolase 48	USP48	140.54	5.75	84	3.2	4	3	3	1.072	1.03	0.976	0.99	0.932	1.008	6.008	0.951917	0.245108
Q92696	Geranylgeranyl transferase type-2 subunit alpha	RABGGTA	70.93	5.46	148	7.4	7	5	5	1.131	1.069	1.107	0.905	0.965	0.831	6.008	0.816752	0.05
Q8N428	Polypeptide N-acetylgalactosaminyltransferase 16	GALNT16	70.88	9.28	42	3	2	2	2	1.327	1.29	1.414	0.666	0.617	0.694	6.008	0.490449	9.17331e-05
O94788	Retinal dehydrogenase 2	ALDH1A2	64.48	5.79	77	10.8	7	5	3	0.892	0.916	0.93	1.1	1.079	1.091	6.008	1.1943	0.05
O95373	Importin-7	IPO7	133.13	4.7	270	9.1	12	8	8	1.162	1.115	1.083	0.853	0.898	0.897	6.008	0.788095	0.05
P02743	Serum amyloid P-component	APCS	28.46	6.1	215	17	11	4	4	1.244	1.205	1.226	0.782	0.739	0.812	6.008	0.63483	0.05
P06733	Alpha-enolase	ENO1	56.42	7.01	2319	48.8	117	20	17	1.136	1.135	1.078	0.912	0.901	0.846	6.008	0.793968	0.05
P06737	Glycogen phosphorylase, liver form	PYGL	112.61	6.71	994	24.7	53	18	12	0.876	1.247	1.145	0.783	1.019	0.938	6.008	0.838433	0.261297
P09622	Dihydrolipoyl dehydrogenase, mitochondrial	DLD	63.65	7.95	1062	28.5	50	13	13	1.073	1.111	1.061	0.906	0.958	0.899	6.008	0.851464	0.05
P28838	Cytosol aminopeptidase	LAP3	65.01	8.03	326	16.8	19	8	8	1.011	0.974	0.995	1.028	0.987	1.013	6.008	1.01611	0.376402
P62979	Ubiquitin-40S ribosomal protein S27a	RPS27A	24.25	9.68	854	42.9	84	9	10	1.128	1.105	1.128	0.86	0.89	0.897	6.008	0.787563	0.05
Q6P2E9	Enhancer of mRNA-decapping protein 4	EDC4	165.37	5.55	147	3.9	7	5	5	1.105	1.146	1.09	0.913	0.856	0.898	6.008	0.798264	0.05
Q86VB7	Scavenger receptor cysteine-rich type 1 protein M130	CD163	140.82	5.61	78	2.7	4	3	3	0.815	0.825	0.779	1.221	1.198	1.17	6.008	1.48367	0.05
Q8NEW0	Zinc transporter 7	SLC30A7	44.46	6.43	77	5.1	3	2	2	1.118	1.265	1.156	0.782	0.865	0.822	6.008	0.697655	0.05
Q92995	Ubiquitin carboxyl-terminal hydrolase 13	USP13	108.09	5.33	44	1.9	2	2	2	1.17	1.177	1.176	0.887	0.806	0.792	6.008	0.705365	0.05
Q99733	Nucleosome assembly protein 1-like 4	NAP1L4	50.53	4.6	149	11.2	9	4	3	1.07	1.044	1.033	0.941	0.941	0.979	6.008	0.90912	0.05
Q9GZS3	WD repeat-containing protein 61	WDR61	38.09	5.16	51	8.2	2	2	2	1.173	1.131	1.081	0.857	0.85	0.916	6.008	0.774889	0.05
Q9GZT9	Egl nine homolog 1	EGLN1	54.64	8.83	63	3.8	4	2	2	1.103	1.162	1.116	0.881	0.838	0.908	6.008	0.776989	0.05
Q9Y3U8	60S ribosomal protein L36	RPL36	16.43	11.59	65	24.8	3	3	3	1.042	1.056	0.995	0.939	0.986	0.99	6.008	0.942451	0.0748251
A0FGR8	Extended synaptotagmin-2	ESYT2	114.95	9.33	229	7.8	10	7	7	0.997	0.997	0.955	1.033	1.011	1.015	6.008	1.0373	0.103007
O95433	Activator of 90 kDa heat shock protein ATPase homolog 1	AHSA1	44.84	5.41	161	13.6	7	5	5	1.159	1.094	1.135	0.864	0.874	0.882	6.008	0.773318	0.05
P43487	Ran-specific GTPase-activating protein	RANBP1	29.43	5.19	93	15.9	3	2	3	0.793	0.859	0.82	1.225	1.153	1.158	6.008	1.43042	0.05
Q96SY0	von Willebrand factor A domain-containing protein 9	VWA9	64.42	4.99	102	3.7	4	2	2	1.2	1.144	1.105	0.811	0.861	0.887	6.008	0.741954	0.05
Q9BUQ8	Probable ATP-dependent RNA helicase DDX23	DDX23	115.8	9.58	488	17.7	24	14	14	1.034	1.021	1.039	0.973	0.957	0.984	6.008	0.941823	0.05
Q09028	Histone-binding protein RBBP4	RBBP4	53.41	4.74	263	24	18	8	5	1.112	1.1	1.048	0.919	0.923	0.905	6.007	0.842638	0.05
Q13951	Core-binding factor subunit beta	CBFB	23.79	6.23	127	13.2	3	2	2	1.118	1.069	1.088	0.864	0.944	0.924	6.007	0.834198	0.05
Q8WVC0	RNA polymerase-associated protein LEO1	LEO1	85.79	4.38	35	5	3	3	4	1.145	1.096	1.159	0.845	0.878	0.884	6.007	0.766765	0.05
Q9H490	Phosphatidylinositol glycan anchor biosynthesis class U protein	PIGU	54.26	7.59	66	4.6	2	2	2	1.14	1.085	1.153	0.861	0.876	0.892	6.007	0.778271	0.05
Q9NRX4	14 kDa phosphohistidine phosphatase	PHPT1	16.52	5.65	100	21.6	6	3	3	1.12	1.144	1.179	0.801	0.845	0.918	6.007	0.744699	0.05
Q9UQ80	Proliferation-associated protein 2G4	PA2G4	53.95	6.13	561	28.2	36	12	12	1.148	1.139	1.118	0.841	0.885	0.876	6.007	0.76417	0.05
Q5SQ64	Lymphocyte antigen 6 complex locus protein G6f	LY6G6F	34.79	8.91	83	5.7	4	2	2	0.708	0.673	0.777	1.326	1.196	1.327	6.007	1.7836	0.00044773
O95864	Fatty acid desaturase 2	FADS2	59.22	8.86	113	6.5	5	2	2	0.778	0.855	0.776	1.148	1.211	1.239	6.007	1.49357	0.05
P02649	Apolipoprotein E	APOE	39.45	5.65	483	44.2	25	13	14	0.978	0.968	0.986	1.032	1.015	1.028	6.007	1.04877	0.05
P35222	Catenin beta-1	CTNNB1	92.26	5.53	575	15.7	23	11	11	1.082	1.04	0.999	0.978	0.92	0.988	6.007	0.924704	0.071493
P35606	Coatomer subunit beta~	COPB2	116.11	5.15	494	30	30	22	25	1.185	1.156	1.136	0.859	0.826	0.845	6.007	0.727639	0.05
P41218	Myeloid cell nuclear differentiation antigen	MNDA	59.38	9.77	191	14.3	8	5	5	0.972	1.076	1.066	0.963	0.925	1.005	6.007	0.92903	0.150708
P42574	Caspase-3	CASP3	37.31	6.09	58	9.4	3	3	3	1.057	1.02	1.047	0.932	0.965	0.986	6.007	0.922855	0.05
P67809	Nuclease-sensitive element-binding protein 1	YBX1	39.8	9.87	49	9.3	2	2	2	1.091	1.044	1.124	0.854	0.992	0.902	6.007	0.843203	0.05
P84085	ADP-ribosylation factor 5	ARF5	23.38	6.3	659	62.8	33	9	4	1.172	1.174	1.169	0.834	0.821	0.837	6.007	0.708962	0.05
Q13438	Protein OS-9	OS9	86.74	4.8	124	13.8	11	9	9	1.131	1.065	1.05	0.949	0.901	0.911	6.007	0.850585	0.05
Q709F0	Acyl-CoA dehydrogenase family member 11	ACAD11	99.03	8.35	66	7.2	5	5	6	0.87	0.919	0.966	1.109	1.076	1.067	6.007	1.1804	0.05
Q8IX12	Cell division cycle and apoptosis regulator protein 1	CCAR1	156.34	5.57	76	5.7	9	8	8	1.011	1.055	1.05	0.977	0.963	0.951	6.007	0.927792	0.05
Q8IXH7	Negative elongation factor C/D	NELFCD	73.94	4.98	62	3.9	3	3	3	1.064	1.042	1.004	0.934	0.926	1.037	6.007	0.931511	0.17535
Q96QU8	Exportin-6	XPO6	141.28	5.94	31	0.6	2	1	1	1.06	1.186	1.044	0.885	1.015	0.817	6.007	0.825836	0.063767
Q99747	Gamma-soluble NSF attachment protein	NAPG	41.71	5.3	363	28.2	17	7	9	1.005	0.965	0.997	1.068	0.963	1.009	6.007	1.0246	0.518254
Q9BSH4	Translational activator of cytochrome c oxidase 1	TACO1	38.18	8.37	65	13.5	3	3	3	0.987	0.909	0.936	1.056	1.07	1.049	6.007	1.12112	0.05
Q9NRA2	Sialin	SLC17A5	58.96	8.51	32	2.8	2	2	2	1.088	1.15	1.151	0.811	0.882	0.925	6.007	0.772499	0.05
P42224	Signal transducer and activator of transcription 1-alpha/beta	STAT1	100.68	5.74	199	12.5	13	7	8	1.152	1.111	1.072	0.911	0.871	0.889	6.006	0.8009	0.05
P55263	Adenosine kinase	ADK	48.94	6.24	67	9.9	3	2	4	1.216	1.208	1.167	0.817	0.786	0.812	6.006	0.672515	0.05
P61803	Dolichyl-diphosphooligosaccharide--protein glycosyltransferase subunit DAD1	DAD1	13.35	6.52	55	28.3	2	2	3	1.091	1.191	1.176	0.902	0.895	0.751	6.006	0.736842	0.05
A4D1P6	WD repeat-containing protein 91	WDR91	94.29	6.15	71	4.1	4	3	3	1.011	0.965	1.004	1.028	0.953	1.045	6.006	1.01544	0.661895
A4D1U4	Protein LCHN	LCHN	56.22	5.19	36	5.3	3	2	2	1.003	0.969	1.058	0.964	0.961	1.051	6.006	0.982178	0.670979
O00267	Transcription elongation factor SPT5	SUPT5H	135.76	4.95	143	8.2	9	7	8	1.052	1.02	1.024	0.974	0.95	0.986	6.006	0.939922	0.05
P01019	Angiotensinogen	AGT	58.45	5.87	122	4.3	3	2	2	1.102	1.072	1.148	0.868	0.886	0.93	6.006	0.807947	0.05
P11387	DNA topoisomerase 1	TOP1	122.06	9.33	123	4.8	6	4	4	1.17	1.127	1.129	0.868	0.844	0.868	6.006	0.753065	0.05
P22307	Non-specific lipid-transfer protein	SCP2	70.41	6.44	305	13	17	7	8	0.954	0.921	0.921	1.054	1.101	1.055	6.006	1.14807	0.05
P31948	Stress-induced-phosphoprotein 1	STIP1	77.89	6.4	535	35.9	41	20	21	1.07	1.084	1.051	0.939	0.92	0.942	6.006	0.873947	0.05
P35610	Sterol O-acyltransferase 1	SOAT1	71.62	9.08	31	1.3	2	1	1	1.101	1.086	1.14	0.873	0.927	0.879	6.006	0.80523	0.05
P40763	Signal transducer and activator of transcription 3	STAT3	99.81	5.94	91	9.1	7	7	7	1.224	1.214	1.195	0.806	0.776	0.791	6.006	0.653179	0.05
P40926	Malate dehydrogenase, mitochondrial	MDH2	42.12	8.92	3004	62.1	131	17	17	0.874	0.891	0.907	1.094	1.112	1.128	6.006	1.24775	0.05
P45984	Mitogen-activated protein kinase 9	MAPK9	55.32	5.41	54	1.9	3	1	1	0.869	0.981	0.886	1.104	1.068	1.098	6.006	1.19518	0.05
P62861	40S ribosomal protein S30	FAU	9.85	12.15	37	16.9	2	1	1	0.937	1.234	1.091	0.818	1.058	0.868	6.006	0.841202	0.201974
Q13151	Heterogeneous nuclear ribonucleoprotein A0	HNRNPA0	35.35	9.34	290	13.8	11	4	4	1.181	1.1	1.033	0.914	0.931	0.847	6.006	0.812311	0.05
Q15061	WD repeat-containing protein 43	WDR43	87.5	5.37	41	2.8	2	1	2	1.201	1.089	1.135	0.897	0.788	0.896	6.006	0.753577	0.05
Q15436	Protein transport protein Sec23A	SEC23A	93.89	6.64	391	18.8	21	13	10	1.153	1.173	1.14	0.85	0.843	0.847	6.006	0.732833	0.05
Q15796	Mothers against decapentaplegic homolog 2	SMAD2	58	6.13	84	6.9	8	3	2	0.866	0.958	1.078	0.978	1.08	1.046	6.006	1.06961	0.39914
Q5GLZ8	Probable E3 ubiquitin-protein ligase HERC4	HERC4	135.27	5.8	50	1.1	2	1	1	1.144	1.09	1.138	0.89	0.889	0.855	6.006	0.781139	0.05
Q7Z2T5	TRMT1-like protein	TRMT1L	94.81	8.11	84	5.2	5	4	4	1.115	1.119	1.16	0.857	0.859	0.896	6.006	0.769593	0.05
Q7Z3B1	Neuronal growth regulator 1	NEGR1	43.05	5.84	24	4	2	2	2	1.106	1.171	1.085	0.888	0.884	0.872	6.006	0.786437	0.05
Q8N4Q0	Zinc-binding alcohol dehydrogenase domain-containing protein 2	ZADH2	45.73	8.38	79	8.2	3	3	3	1.064	1.02	1.089	0.97	0.937	0.926	6.006	0.892846	0.05
Q8TDY2	RB1-inducible coiled-coil protein 1	RB1CC1	216.02	5.3	35	1.8	2	1	3	1.112	1.099	1.129	0.857	0.874	0.935	6.006	0.798204	0.05
Q92499	ATP-dependent RNA helicase DDX1	DDX1	97.79	6.81	373	22.2	30	15	16	1.228	1.253	1.19	0.789	0.766	0.78	6.006	0.636066	0.05
Q99496	E3 ubiquitin-protein ligase RING2	RNF2	43.82	6.38	72	12.2	3	3	3	1.165	1.057	1.067	0.884	0.955	0.878	6.006	0.826087	0.05
Q9C040	Tripartite motif-containing protein 2	TRIM2	93.73	6.51	245	9.9	11	7	6	0.982	0.962	0.998	1.016	1.032	1.016	6.006	1.04147	0.05
Q9NUV9	GTPase IMAP family member 4	GIMAP4	43.93	7.66	52	10.3	4	4	3	1.048	1.035	1	0.942	0.999	0.982	6.006	0.948102	0.0754828
Q9NYU1	UDP-glucose:glycoprotein glucosyltransferase 2	UGGT2	203.44	6.43	42	1.7	3	3	3	0.942	0.933	0.936	1.099	0.995	1.101	6.006	1.13661	0.0665228
Q9UBC2	Epidermal growth factor receptor substrate 15-like 1	EPS15L1	109.44	4.93	106	3.5	6	3	3	1.008	0.932	0.965	1.036	1.033	1.032	6.006	1.06747	0.0967295
Q9UHG3	Prenylcysteine oxidase 1	PCYOX1	64.11	5.8	159	15	10	6	7	1.068	0.997	0.992	0.986	0.971	0.992	6.006	0.964671	0.277582
Q9UJZ1	Stomatin-like protein 2, mitochondrial	STOML2	42.75	6.88	930	30.3	29	6	8	0.78	0.835	0.86	1.158	1.178	1.195	6.006	1.42667	0.05
Q9Y2J0	Rabphilin-3A	RPH3A	89.83	8.62	45	3.7	2	2	2	1.123	1.109	1.067	0.882	0.984	0.841	6.006	0.820552	0.05
P53992	Protein transport protein Sec24C	SEC24C	128.5	6.71	336	13.2	21	11	12	1.055	1.113	1.048	0.935	0.943	0.912	6.006	0.867537	0.05
Q13554	Calcium/calmodulin-dependent protein kinase type II subunit beta	CAMK2B	82.02	6.87	119	11.4	8	7	4	0.957	0.971	0.872	1.053	1.116	1.037	6.006	1.145	0.05
Q16401	26S proteasome non-ATPase regulatory subunit 5	PSMD5	61.6	5.35	228	16.1	12	8	8	1.053	1.069	1.109	0.922	0.912	0.941	6.006	0.858867	0.05
Q96SZ5	2-aminoethanethiol dioxygenase	ADO	32.14	5.68	34	6.3	2	2	2	1.168	1.06	1.134	0.878	0.822	0.944	6.006	0.786437	0.05
Q9H0B6	Kinesin light chain 2	KLC2	79.38	6.72	314	23.6	17	12	9	0.998	0.973	1.038	1.001	1.007	0.989	6.006	0.996012	0.855285
O15229	Kynurenine 3-monooxygenase	KMO	62.99	9.18	47	3.1	2	1	1	1.017	1.179	1.02	0.811	1.163	0.815	6.005	0.867226	0.353396
O43847	Nardilysin	NRD1	149.93	4.89	129	4.1	7	6	5	1.162	1.138	1.096	0.911	0.852	0.846	6.005	0.768257	0.05
P24386	Rab proteins geranylgeranyltransferase component A 1	CHM	82.07	4.68	77	4.3	2	2	2	1.16	1.087	1.145	0.853	0.847	0.913	6.005	0.770342	0.05
Q7RTV2	Glutathione S-transferase A5	GSTA5	31.03	7.74	92	12.2	3	2	2	1.145	1.164	0.983	0.872	1.051	0.79	6.005	0.824119	0.120771
O75083	WD repeat-containing protein 1	WDR1	76.23	6.17	393	20.6	22	12	12	0.999	0.999	0.999	1.012	0.981	1.015	6.005	1.00367	0.767945
O95302	Peptidyl-prolyl cis-trans isomerase FKBP9	FKBP9	69.69	4.91	61	4.2	4	3	3	1.052	1.042	0.989	1.001	0.936	0.985	6.005	0.947778	0.124231
P14406	Cytochrome c oxidase subunit 7A2, mitochondrial	COX7A2	11.22	9.75	167	27.7	7	2	2	0.99	0.968	1.005	1.034	0.993	1.015	6.005	1.02666	0.17567
P27348	14-3-3 protein theta	YWHAQ	32.62	4.68	921	53.9	46	15	9	1.083	1.09	1.034	0.939	0.914	0.945	6.005	0.872466	0.05
P32969	60S ribosomal protein L9	RPL9	26.09	9.96	304	28.6	19	6	7	1.086	1.219	1.031	0.862	0.975	0.832	6.005	0.80006	0.05
P39023	60S ribosomal protein L3	RPL3	59.43	10.19	118	20.8	14	7	8	1.139	1.188	1.058	0.871	0.906	0.843	6.005	0.774003	0.05
P55060	Exportin-2	CSE1L	124.67	5.51	292	11.7	23	13	13	1.039	1.035	1.001	0.973	0.999	0.958	6.005	0.952846	0.05
Q13085	Acetyl-CoA carboxylase 1	ACACA	292.07	5.95	401	9	24	20	20	0.957	0.99	0.99	0.999	1.027	1.042	6.005	1.0446	0.0604718
Q14980	Nuclear mitotic apparatus protein 1	NUMA1	274.03	5.63	2288	30.3	121	66	64	1.035	1.019	1.019	0.979	0.968	0.985	6.005	0.954116	0.05
Q6PJT7	Zinc finger CCCH domain-containing protein 14	ZC3H14	96.17	6.99	226	10.7	10	7	7	1.029	1.039	1.015	0.966	0.966	0.99	6.005	0.947778	0.05
Q6PML9	Zinc transporter 9	SLC30A9	71.66	8.6	343	19	18	11	11	0.799	0.814	0.82	1.209	1.169	1.194	6.005	1.46815	0.05
Q6ZSR9	Uncharacterized protein FLJ45252	Q6ZSR9	42.76	5.14	145	20.6	6	5	5	1.079	1.048	1.094	0.931	0.888	0.965	6.005	0.864328	0.05
Q86UA1	Pre-mRNA-processing factor 39	PRPF39	88.12	5.26	50	3.7	2	2	2	1.091	1.279	1.072	0.871	0.863	0.829	6.005	0.744625	0.05
Q86UX7	Fermitin family homolog 3	FERMT3	84.5	6.52	438	24.7	20	12	13	0.825	0.884	0.865	1.158	1.1	1.173	6.005	1.33294	0.05
Q8NE01	Metal transporter CNNM3	CNNM3	80.88	5.76	55	2.8	2	2	2	1.074	1.047	1.188	0.87	0.901	0.925	6.005	0.814748	0.05
Q969S9	Ribosome-releasing factor 2, mitochondrial	GFM2	97.48	6.08	109	4.7	5	4	4	0.879	0.908	0.917	1.107	1.096	1.098	6.005	1.22078	0.05
Q96DA2	Ras-related protein Rab-39B	RAB39B	27.59	7.7	192	28.2	13	6	5	0.938	1.016	0.962	1.001	1.037	1.051	6.005	1.05933	0.115303
Q96JB2	Conserved oligomeric Golgi complex subunit 3	COG3	107.84	5.39	196	9.5	7	6	7	1.189	1.244	1.248	0.756	0.773	0.795	6.005	0.63135	0.05
Q96RT1	Protein LAP2	ERBB2IP	178.88	5.32	41	1.8	3	2	3	1.063	1.148	0.969	0.794	1.139	0.892	6.005	0.888365	0.380002
Q99460	26S proteasome non-ATPase regulatory subunit 1	PSMD1	123.07	5.25	791	25.3	45	22	22	1.084	1.082	1.044	0.948	0.909	0.938	6.005	0.870717	0.05
Q9BQG0	Myb-binding protein 1A	MYBBP1A	173.11	9.34	135	6.1	8	7	7	1.126	1.081	1.099	0.934	0.875	0.89	6.005	0.816394	0.05
Q9Y263	Phospholipase A-2-activating protein	PLAA	98.95	5.96	427	15	15	10	10	1.086	1.085	1.036	0.958	0.935	0.905	6.005	0.872466	0.05
P10643	Complement component C7	C7	107.88	6.09	75	4.7	3	3	4	1.038	0.999	0.987	1.01	0.962	1.009	6.005	0.98578	0.551753
P12270	Nucleoprotein TPR	TPR	308.09	4.97	1260	22.1	75	48	53	1.049	1.02	1.031	0.976	0.954	0.975	6.005	0.937097	0.05
Q9ULX6	A-kinase anchor protein 8-like	AKAP8L	81.46	4.97	177	13.9	9	9	8	1.167	1.178	1.132	0.856	0.797	0.875	6.005	0.727064	0.05
Q96IJ6	Mannose-1-phosphate guanyltransferase alpha	GMPPA	49.58	6.73	129	11.9	7	5	5	1.312	1.261	1.311	0.683	0.681	0.756	6.004	0.545829	3.92783e-05
O75663	TIP41-like protein	TIPRL	36.23	5.6	48	6.3	2	2	2	1.115	1.059	1.141	0.869	0.896	0.924	6.004	0.811161	0.05
P53396	ATP-citrate synthase	ACLY	138.4	6.95	2013	31.4	103	32	32	1.027	1.161	1.155	0.828	0.931	0.902	6.004	0.795992	0.05
P61081	NEDD8-conjugating enzyme Ubc12	UBE2M	25.53	7.57	138	30.6	10	6	6	1.08	1.166	1.161	0.843	0.886	0.868	6.004	0.762254	0.05
Q15643	Thyroid receptor-interacting protein 11	TRIP11	270.75	5.18	172	7.2	16	14	15	1.155	1.081	1.086	0.908	0.89	0.884	6.004	0.807345	0.05
Q96MX6	WD repeat-containing protein 92	WDR92	46.59	8.32	40	9.5	3	3	2	1.117	1.134	1.079	0.886	0.937	0.851	6.004	0.803003	0.05
Q9BR76	Coronin-1B	CORO1B	60.16	5.61	57	7	9	5	3	1.104	1.123	1.108	0.9	0.894	0.875	6.004	0.8003	0.05
Q9H0L4	Cleavage stimulation factor subunit 2 tau variant	CSTF2T	68.52	6.79	89	10.6	6	6	6	1.016	1.097	1.09	0.951	0.903	0.947	6.004	0.874493	0.05
Q9NQC7	Ubiquitin carboxyl-terminal hydrolase CYLD	CYLD	123.68	5.42	64	3.8	3	3	3	1.046	1.117	0.989	0.942	0.989	0.921	6.004	0.904822	0.0957928
Q9NW68	BSD domain-containing protein 1	BSDC1	53.61	4.43	46	4.4	2	2	2	1.162	1.101	1.145	0.872	0.868	0.856	6.004	0.761737	0.05
Q9Y5K6	CD2-associated protein	CD2AP	89.51	6.07	35	5.5	4	4	4	1.052	1.129	1.118	0.885	0.95	0.87	6.004	0.819945	0.05
P12694	2-oxoisovalerate dehydrogenase subunit alpha, mitochondrial	BCKDHA	55.08	8.42	320	21.8	18	9	9	0.931	0.954	0.96	1.084	0.999	1.076	6.004	1.11037	0.05
P16870	Carboxypeptidase E	CPE	58.79	5.03	792	24.8	71	12	13	1.021	1	1.009	0.995	0.991	0.988	6.004	0.981518	0.0795221
P23396	40S ribosomal protein S3	RPS3	31.66	9.68	744	72.8	49	17	17	1.057	1.125	1.048	0.915	0.98	0.879	6.004	0.858824	0.05
P30153	Serine/threonine-protein phosphatase 2A 65 kDa regulatory subunit A alpha isoform	PPP2R1A	73.63	5	433	27	28	14	15	1.114	1.12	1.065	0.892	0.944	0.869	6.004	0.819945	0.05
P55145	Mesencephalic astrocyte-derived neurotrophic factor	MANF	26.41	8.93	101	15.4	5	3	3	1.182	1.107	1.188	0.849	0.829	0.849	6.004	0.726776	0.05
Q14409	Putative glycerol kinase 3	GK3P	68.52	6	186	13.9	12	8	7	0.992	1.028	0.977	1.023	1.028	0.956	6.004	1.00334	0.910937
Q71UM5	40S ribosomal protein S27-like	RPS27L	12.33	9.57	67	25	3	2	2	1.074	1.198	1.103	0.867	0.912	0.85	6.004	0.778963	0.05
Q96SB3	Neurabin-2	PPP1R9B	100.77	4.91	119	6.6	6	5	6	1.016	0.963	0.949	1.06	0.99	1.026	6.004	1.05055	0.160971
Q9H6U8	Alpha-1,2-mannosyltransferase ALG9	ALG9	76.57	8.91	266	6.1	7	3	3	0.982	1.026	1.03	0.944	1.018	1.004	6.004	0.9763	0.437035
Q9UHY7	Enolase-phosphatase E1	ENOPH1	32.29	4.66	87	14.6	6	4	4	1.088	1.049	1.073	0.954	0.927	0.913	6.004	0.870405	0.05
Q9Y295	Developmentally-regulated GTP-binding protein 1	DRG1	49.51	9	124	10.6	4	3	3	1.087	1.226	1.118	0.81	0.984	0.779	6.004	0.749927	0.05
O00203	AP-3 complex subunit beta-1	AP3B1	143.36	5.76	266	8.7	13	9	8	1.217	1.18	1.207	0.796	0.792	0.811	6.003	0.665649	0.05
O60563	Cyclin-T1	CCNT1	93.18	8.9	46	3	2	2	2	1.08	0.967	1.205	0.901	0.947	0.903	6.003	0.845941	0.129934
O75382	Tripartite motif-containing protein 3	TRIM3	88.97	8.03	49	6.7	6	6	4	0.901	0.931	1.049	1.053	0.994	1.075	6.003	1.08365	0.213168
O95183	Vesicle-associated membrane protein 5	VAMP5	14.34	7.68	71	23.3	5	3	3	0.869	0.813	0.77	1.215	1.138	1.198	6.003	1.44821	0.05
P07195	L-lactate dehydrogenase B chain	LDHB	43.09	5.71	801	38.3	40	12	10	1.099	1.046	1.012	0.997	0.946	0.903	6.003	0.901489	0.05
P13647	Keratin, type II cytoskeletal 5	KRT5	69.44	7.59	236	21	17	13	6	0.731	0.664	0.829	1.288	1.213	1.278	6.003	1.69919	0.05
P30622	CAP-Gly domain-containing linker protein 1	CLIP1	198.41	5.29	125	6	9	8	7	1.122	0.945	1	0.966	0.989	0.981	6.003	0.957287	0.492291
P53582	Methionine aminopeptidase 1	METAP1	49.37	6.75	45	4.9	2	2	2	1.12	1.072	1.115	0.874	0.876	0.946	6.003	0.81524	0.05
P84098	60S ribosomal protein L19	RPL19	31.13	11.48	63	19.9	3	3	4	1.065	1.042	0.984	0.995	0.943	0.974	6.003	0.94209	0.117023
Q07812	Apoptosis regulator BAX	BAX	23.58	5.08	237	29.2	9	4	4	0.923	0.868	0.948	1.145	1.031	1.088	6.003	1.19168	0.05
Q15057	Arf-GAP with coiled-coil, ANK repeat and PH domain-containing protein 2	ACAP2	104.07	6.38	72	5.8	5	5	5	1.048	1.039	0.993	0.978	0.984	0.961	6.003	0.949026	0.0758465
Q15257	Serine/threonine-protein phosphatase 2A activator	PPP2R4	46.83	5.63	110	14.8	7	4	4	1.015	1.029	1.056	1.034	0.945	0.924	6.003	0.936452	0.182003
Q6ZTN6	Ankyrin repeat domain-containing protein 13D	ANKRD13D	62.39	5.26	40	4.1	2	2	2	1.111	1.055	1.17	0.866	0.916	0.885	6.003	0.79946	0.05
Q92823	Neuronal cell adhesion molecule	NRCAM	162.99	5.45	139	8.4	7	7	8	1.206	1.26	1.173	0.824	0.769	0.771	6.003	0.649629	0.05
Q96S44	TP53-regulating kinase	TP53RK	31.69	9.56	60	6.7	2	1	2	1.136	1.062	1.124	0.881	0.871	0.929	6.003	0.807044	0.05
Q9BY11	Protein kinase C and casein kinase substrate in neurons protein 1	PACSIN1	61.59	5.15	67	8.3	5	4	3	1.042	1.046	0.992	0.94	1.011	0.972	6.003	0.949026	0.125465
Q9Y3C6	Peptidyl-prolyl cis-trans isomerase-like 1	PPIL1	20.86	7.78	51	25.3	3	3	3	1.137	1.131	1.077	0.907	0.859	0.892	6.003	0.794619	0.05
O95721	Synaptosomal-associated protein 29	SNAP29	33.77	5.56	186	19.8	6	5	6	0.785	0.841	0.867	1.154	1.258	1.098	6.003	1.40794	0.05
P17655	Calpain-2 catalytic subunit	CAPN2	90.42	4.87	238	9.1	12	7	7	1.167	1.17	1.152	0.827	0.826	0.861	6.003	0.72055	0.05
P62899	60S ribosomal protein L31	RPL31	18.35	10.54	112	40.8	14	6	6	1.098	1.162	1.101	0.835	0.93	0.877	6.003	0.786076	0.05
Q8TDX7	Serine/threonine-protein kinase Nek7	NEK7	40.48	8.49	66	13.9	6	4	4	1.16	1.143	1.167	0.826	0.821	0.886	6.003	0.729971	0.05
Q96I15	Selenocysteine lyase	SCLY	52.76	6.63	164	13.7	10	6	6	1.027	1.089	1.025	0.971	0.924	0.967	6.003	0.911175	0.05
Q9H9D4	Zinc finger protein 408	ZNF408	87.72	6.88	22	0.8	2	1	1	0.923	1.287	1.077	0.806	1.033	0.877	6.003	0.826285	0.214907
Q9NX95	Syntabulin	SYBU	80.7	5.87	41	1.2	2	1	1	1.121	1.038	1.142	0.899	0.904	0.899	6.003	0.81854	0.05
O00231	26S proteasome non-ATPase regulatory subunit 11	PSMD11	55.97	6.08	551	34.6	23	13	14	1.094	1.122	1.049	0.915	0.919	0.903	6.002	0.838285	0.05
Q53H82	Beta-lactamase-like protein 2	LACTB2	38.11	6.32	59	6.3	2	1	1	1.124	1.056	1.017	0.864	1.006	0.935	6.002	0.877385	0.0686598
Q8IWZ6	Bardet-Biedl syndrome 7 protein	BBS7	93.19	5.7	41	4.3	3	3	3	1.137	1.081	1.051	0.887	0.965	0.881	6.002	0.836035	0.05
Q8WUA4	General transcription factor 3C polypeptide 2	GTF3C2	111.32	6.94	35	1.2	2	1	1	1.101	1.128	1.147	0.813	0.855	0.958	6.002	0.777844	0.05
Q8WZA2	Rap guanine nucleotide exchange factor 4	RAPGEF4	131.37	6.37	64	3.4	3	3	3	0.981	0.822	0.746	1.108	1.216	1.129	6.002	1.35465	0.05
Q96Q05	Trafficking protein particle complex subunit 9	TRAPPC9	143.11	6.17	118	6.8	7	6	7	0.977	0.954	1.005	1.034	1.004	1.028	6.002	1.04428	0.0793477
O15439	Multidrug resistance-associated protein 4	ABCC4	167.76	8.41	168	4.8	10	6	6	0.985	0.931	0.951	1.058	1.055	1.022	6.002	1.09348	0.05
O43181	NADH dehydrogenase [ubiquinone] iron-sulfur protein 4, mitochondrial	NDUFS4	23.53	10.3	125	20	8	3	3	1.132	1.036	1.075	0.943	0.931	0.885	6.002	0.850755	0.05
O43237	Cytoplasmic dynein 1 light intermediate chain 2	DYNC1LI2	63.75	5.97	530	26.8	24	11	12	1.171	1.087	1.126	0.879	0.867	0.872	6.002	0.773641	0.05
O75636	Ficolin-3	FCN3	35.23	6.2	41	6.4	2	2	2	1.154	1.295	1.205	0.785	0.782	0.781	6.002	0.642583	0.05
O95182	NADH dehydrogenase [ubiquinone] 1 alpha subcomplex subunit 7	NDUFA7	14.89	10.19	33	23.9	2	2	2	1.132	1.073	1.111	0.88	0.878	0.928	6.002	0.810012	0.05
P55157	Microsomal triglyceride transfer protein large subunit	MTTP	115.96	8.61	59	0.9	2	1	1	0.994	1.153	1.147	0.893	0.973	0.842	6.002	0.822101	0.05
P60201	Myelin proteolipid protein	PLP1	33.84	8.71	211	14.4	7	3	4	1.111	1.076	1.037	0.871	1.001	0.906	6.002	0.861663	0.05
Q96LD4	Tripartite motif-containing protein 47	TRIM47	74.64	6.03	95	4.7	3	3	3	0.865	0.831	0.885	1.138	1.15	1.133	6.002	1.32546	0.05
Q96M96	FYVE, RhoGEF and PH domain-containing protein 4	FGD4	102.26	5.8	92	3.3	2	2	2	1.222	1.108	1.148	0.845	0.764	0.915	6.002	0.725704	0.05
Q9NYM9	BET1-like protein	BET1L	13.81	7.88	92	32.4	4	2	3	1.053	1.162	1.226	0.789	0.856	0.916	6.002	0.74426	0.05
Q05639	Elongation factor 1-alpha 2	EEF1A2	61.55	9.11	1686	33.5	85	14	6	1.056	1.066	1.119	0.917	0.906	0.938	6.002	0.851898	0.05
P01042	Kininogen-1	KNG1	84.91	6.34	295	14	11	7	8	1.084	1.082	1.096	0.918	0.892	0.929	6.001	0.839669	0.05
Q8WXA3	RUN and FYVE domain-containing protein 2	RUFY2	89.56	6.11	65	7	5	5	3	1.016	0.982	0.907	0.958	1.022	1.116	6.001	1.06575	0.326215
P23919	Thymidylate kinase	DTYMK	27.87	8.39	157	16.5	6	4	4	0.929	0.84	0.937	1.096	1.104	1.095	6.001	1.21766	0.05
P43003	Excitatory amino acid transporter 1	SLC1A3	66.35	8.52	78	8.9	4	4	4	1.082	1.152	1.117	0.889	0.915	0.846	6.001	0.790809	0.05
P62081	40S ribosomal protein S7	RPS7	27.84	10.09	402	28.9	19	5	5	1.123	1.152	1.079	0.88	0.91	0.857	6.001	0.789207	0.05
P62995	Transformer-2 protein homolog beta	TRA2B	35.59	11.25	69	11.1	6	3	2	1.025	1.071	1.038	0.904	1	0.963	6.001	0.914805	0.0670624
P78352	Disks large homolog 4	DLG4	89.72	5.58	262	11.6	13	8	7	1.033	1.04	1.007	0.95	1.04	0.931	6.001	0.948377	0.251605
Q13011	Delta(3,5)-Delta(2,4)-dienoyl-CoA isomerase, mitochondrial	ECH1	40.26	8.16	716	20.1	21	6	6	0.88	0.893	0.871	1.11	1.095	1.152	6.001	1.26967	0.05
Q15365	Poly(rC)-binding protein 1	PCBP1	41.42	6.66	613	29.2	23	8	4	1.03	1.02	1.036	0.989	0.944	0.982	6.001	0.944588	0.05
Q96GX9	Methylthioribulose-1-phosphate dehydratase	APIP	32.55	6.7	43	12.8	4	3	3	1.256	1.138	1.096	0.838	0.833	0.84	6.001	0.719484	0.05
Q96J42	Thioredoxin domain-containing protein 15	TXNDC15	42.44	4.77	39	3.3	2	1	1	1.176	1.056	1.116	0.933	0.859	0.861	6.001	0.792413	0.05
Q9NS15	Latent-transforming growth factor beta-binding protein 3	LTBP3	154.7	5.71	87	0.8	3	1	1	1.006	0.975	0.903	1.066	1.006	1.045	6.001	1.08079	0.109056
Q9NZJ6	Ubiquinone biosynthesis O-methyltransferase, mitochondrial	COQ3	47.04	7.1	121	10	4	3	3	1.085	1.102	1.133	0.915	0.877	0.889	6.001	0.80753	0.05
P54687	Branched-chain-amino-acid aminotransferase, cytosolic	BCAT1	48.78	5.17	87	3.9	2	1	1	1.636	1.668	1.554	0.403	0.369	0.371	6.001	0.235282	4.11706e-06
O43264	Centromere/kinetochore protein zw10 homolog	ZW10	103.15	5.89	118	9.8	7	6	6	1.075	1.038	1.059	0.917	0.949	0.963	6.001	0.891866	0.05
O76003	Glutaredoxin-3	GLRX3	44.57	5.31	108	14.9	7	5	5	1.125	1.135	1.129	0.865	0.893	0.854	6.001	0.770729	0.05
P01023	Alpha-2-macroglobulin	A2M	185.24	6.03	656	14.4	35	18	18	1.085	1.088	1.079	0.916	0.893	0.94	6.001	0.845326	0.05
P35080	Profilin-2	PFN2	17.67	6.55	140	27.1	7	4	4	1.166	1.161	1.087	0.854	0.885	0.848	6.001	0.757762	0.05
P48739	Phosphatidylinositol transfer protein beta isoform	PITPNB	38.22	6.41	214	25.1	9	7	6	1.099	1.089	1.057	0.966	0.879	0.911	6.001	0.849307	0.05
P78347	General transcription factor II-I	GTF2I	132.57	6.09	558	15.3	31	15	16	1.009	1.045	1.025	0.98	0.963	0.979	6.001	0.949009	0.05
Q14974	Importin subunit beta-1	KPNB1	108.5	4.68	256	9.6	20	8	8	1.102	1.107	1.076	0.907	0.89	0.919	6.001	0.826788	0.05
Q15428	Splicing factor 3A subunit 2	SF3A2	54.61	9.65	120	8.6	5	3	4	1.068	0.996	0.989	1.009	0.944	0.995	6.001	0.965608	0.339534
Q29RF7	Sister chromatid cohesion protein PDS5 homolog A	PDS5A	178.4	8.15	58	3.6	4	4	5	1.088	1.048	1.065	0.95	0.914	0.936	6.001	0.874727	0.05
Q96BY2	Modulator of apoptosis 1	MOAP1	43.84	5.21	49	9.7	3	3	3	1.005	0.922	1.003	1.052	1.033	0.986	6.001	1.04812	0.241847
Q96NT5	Proton-coupled folate transporter	SLC46A1	52.89	9.03	51	3.1	2	1	1	1.175	0.936	1.197	0.963	0.887	0.843	6.001	0.814087	0.11917
Q99832	T-complex protein 1 subunit eta	CCT7	69.47	7.55	1002	38.9	49	18	18	0.971	0.924	0.968	1.048	1.033	1.057	6.001	1.09605	0.05
Q9BUL8	Programmed cell death protein 10	PDCD10	29.73	7.79	140	29.7	7	6	6	1.049	1.016	0.998	0.954	1.008	0.976	6.001	0.95919	0.12679
Q9H1Z4	WD repeat-containing protein 13	WDR13	57.73	9.33	75	9.5	4	3	4	0.987	0.923	0.991	1.055	1.041	1.004	6.001	1.0686	0.076275
Q9HAV0	Guanine nucleotide-binding protein subunit beta-4	GNB4	40.35	5.6	343	20.9	15	5	2	1.156	1.039	0.964	0.937	1.023	0.882	6.001	0.899652	0.208289
Q9UHX1	Poly(U)-binding-splicing factor PUF60	PUF60	67.57	5.19	204	20	12	9	10	1.103	1.038	1.091	0.93	0.883	0.956	6.001	0.856745	0.05
Q9Y3B7	39S ribosomal protein L11, mitochondrial	MRPL11	25.08	9.91	203	29.2	7	5	5	1.065	1.081	1.082	0.89	0.891	0.992	6.001	0.859046	0.05
Q9Y5B0	RNA polymerase II subunit A C-terminal domain phosphatase	CTDP1	115.62	5.17	54	2.4	3	2	2	0.988	1.057	1.086	0.95	0.98	0.94	6.001	0.91664	0.0797535
Q14914	Prostaglandin reductase 1	PTGR1	43.41	8.45	239	11.6	9	4	4	1.088	1.09	1.008	0.953	0.953	0.908	6	0.883239	0.05
Q92804	TATA-binding protein-associated factor 2N	TAF15	65.92	8.04	385	13.2	20	9	6	1.129	1.127	1.106	0.887	0.851	0.9	6	0.784652	0.05
Q9UNF0	Protein kinase C and casein kinase substrate in neurons protein 2	PACSIN2	66.82	5.08	114	12.1	7	5	5	1.109	1.129	1.127	0.865	0.876	0.894	6	0.783061	0.05
O43776	Asparagine--tRNA ligase, cytoplasmic	NARS	72.01	5.9	167	11.3	9	5	5	1.017	1	1.024	1.025	0.934	1	6	0.973035	0.421984
O43824	Putative GTP-binding protein 6	GTPBP6	62.92	9.49	123	11.6	8	5	5	0.955	0.935	1.022	1.026	1.014	1.048	6	1.06044	0.143716
O75643	U5 small nuclear ribonucleoprotein 200 kDa helicase	SNRNP200	277.63	5.73	1085	15.1	61	32	32	1.041	1.006	1.025	0.993	0.958	0.977	6	0.953125	0.05
P13796	Plastin-2	LCP1	81.36	5.29	455	23.1	27	13	9	1.16	1.076	1.081	0.906	0.889	0.888	6	0.808863	0.05
P51159	Ras-related protein Rab-27A	RAB27A	28.12	5.09	179	19.5	9	5	5	1.132	1.11	1.136	0.867	0.865	0.89	6	0.776199	0.05
P54136	Arginine--tRNA ligase, cytoplasmic	RARS	88.96	6.26	528	23.3	32	16	14	1.062	1.107	1.045	0.924	0.923	0.939	6	0.866833	0.05
P62847	40S ribosomal protein S24	RPS24	20.91	10.79	44	29.3	2	2	4	1.044	1.224	1.059	0.812	0.949	0.912	6	0.803427	0.05
P63279	SUMO-conjugating enzyme UBC9	UBE2I	21.66	8.87	50	12	2	2	2	1.051	1.188	1.087	0.876	0.942	0.856	6	0.803969	0.05
Q06033	Inter-alpha-trypsin inhibitor heavy chain H3	ITIH3	113.82	5.49	83	5.8	5	5	5	1.127	1.134	1.1	0.889	0.868	0.882	6	0.785183	0.05
Q14693	Phosphatidate phosphatase LPIN1	LPIN1	112.81	6.14	69	3.4	3	3	2	1.134	1.033	1.047	0.897	0.962	0.927	6	0.866833	0.05
Q9BTE6	Alanyl-tRNA editing protein Aarsd1	AARSD1	51.52	6	100	10.4	4	3	3	1.184	1.1	1.141	0.889	0.833	0.853	6	0.751825	0.05
Q9BUI4	DNA-directed RNA polymerase III subunit RPC3	POLR3C	69.22	6.88	40	3.9	2	2	2	1.106	1.064	1.118	0.883	0.942	0.887	6	0.824818	0.05
Q9BVS5	tRNA (adenine(58)-N(1))-methyltransferase, mitochondrial	TRMT61B	60.26	6.17	76	6.3	3	2	2	0.883	0.957	0.951	1.085	1.021	1.103	6	1.14977	0.05
Q9NRW7	Vacuolar protein sorting-associated protein 45	VPS45	75.06	8.41	29	4	3	3	3	1.121	1.088	1.053	0.915	0.915	0.908	6	0.839362	0.05
Q9NW64	Pre-mRNA-splicing factor RBM22	RBM22	54.48	8.83	91	8.6	5	4	4	1.188	1.113	1.106	0.879	0.839	0.875	6	0.76108	0.05
P06746	DNA polymerase beta	POLB	46.8	9.01	67	9.6	3	3	3	1.124	1.077	1.059	0.949	0.866	0.925	6	0.840491	0.05
Q13561	Dynactin subunit 2	DCTN2	52.11	5.1	557	39.2	24	14	13	1.048	0.999	1.037	0.966	0.983	0.967	6	0.945525	0.05
Q92747	Actin-related protein 2/3 complex subunit 1A	ARPC1A	47.84	8.46	225	21.4	14	8	8	0.992	0.972	0.998	1.015	1.023	1	6	1.02566	0.0721781
Q9H4G4	Golgi-associated plant pathogenesis-related protein 1	GLIPR2	20.99	9.44	149	29.9	6	5	5	0.812	0.876	0.844	1.156	1.148	1.164	6	1.36967	0.05
Q15751	Probable E3 ubiquitin-protein ligase HERC1	HERC1	587.14	5.69	25	0.4	2	2	2	1.237	1.161	1.244	0.815	0.746	0.796	5.999	0.647172	0.05
O43815	Striatin	STRN	98.22	5.12	62	6	5	5	5	0.943	0.984	0.92	1.072	1.029	1.051	5.999	1.10713	0.05
P17213	Bactericidal permeability-increasing protein	BPI	62.34	9.41	54	6.2	2	2	3	1.14	1.111	1.197	0.81	0.87	0.871	5.999	0.739849	0.05
P62917	60S ribosomal protein L8	RPL8	34.42	11.03	154	26.5	9	5	5	1.052	1.293	1.07	0.847	0.891	0.846	5.999	0.756662	0.065371
Q15424	Scaffold attachment factor B1	SAFB	117.24	5.32	730	18.7	32	16	13	1.003	0.99	0.98	0.999	1.002	1.025	5.999	1.01783	0.173084
Q5VWJ9	Sorting nexin-30	SNX30	57.32	5.21	154	8.2	5	4	4	0.912	0.876	0.927	1.096	1.076	1.112	5.999	1.20958	0.05
Q8IZA0	Dyslexia-associated protein KIAA0319-like protein	KIAA0319L	132.25	5.71	75	4.9	4	3	4	1.016	1.064	1.026	0.979	0.966	0.948	5.999	0.931423	0.05
Q96MZ0	Ganglioside-induced differentiation-associated protein 1-like 1	GDAP1L1	48.02	6.14	40	10.9	2	2	3	0.925	1.022	0.964	1.038	1.102	0.948	5.999	1.0608	0.337102
Q9BW27	Nuclear pore complex protein Nup85	NUP85	82.47	5.36	116	5.9	4	4	4	1.12	1.078	1.062	0.928	0.906	0.905	5.999	0.840184	0.05
Q9NR34	Mannosyl-oligosaccharide 1,2-alpha-mannosidase IC	MAN1C1	78.2	7.01	70	6.7	4	4	4	1.039	1.081	1.053	0.955	0.923	0.948	5.999	0.89064	0.05
Q9P2X3	Protein IMPACT	IMPACT	42.98	4.86	68	12.5	3	3	3	1.093	1.074	1.094	0.929	0.914	0.895	5.999	0.83962	0.05
Q9UBS8	E3 ubiquitin-protein ligase RNF14	RNF14	61.81	4.66	50	4	3	3	3	1.037	1.062	1.133	0.971	0.876	0.92	5.999	0.856126	0.05
Q9UIQ6	Leucyl-cystinyl aminopeptidase	LNPEP	132.45	5.5	214	10.1	11	8	9	1.188	1.172	1.172	0.845	0.783	0.839	5.999	0.698471	0.05
Q9UNP9	Peptidyl-prolyl cis-trans isomerase E	PPIE	39.88	5.41	104	8.6	6	3	2	1.154	1.063	1.092	0.925	0.862	0.903	5.999	0.812934	0.05
P01714	Ig lambda chain V-III region SH	P01714	12.42	6.02	61	16.7	2	1	1	1.136	1.131	1.162	0.945	0.806	0.819	5.999	0.74949	0.05
P17152	Transmembrane protein 11, mitochondrial	TMEM11	24.05	6.98	99	21.9	5	4	5	0.842	0.857	0.89	1.166	1.108	1.136	5.999	1.31711	0.05
P20674	Cytochrome c oxidase subunit 5A, mitochondrial	COX5A	18.76	6.3	307	48.7	23	8	8	0.948	0.913	0.98	1.044	1.059	1.055	5.999	1.11158	0.05
P49792	E3 SUMO-protein ligase RanBP2	RANBP2	425.38	5.85	939	13.4	53	36	22	1.096	1.048	1.05	0.933	0.925	0.947	5.999	0.878209	0.05
Q14117	Dihydropyrimidinase	DPYS	65.13	6.81	49	2.1	2	1	1	1.074	1.067	1.125	0.898	0.922	0.913	5.999	0.836803	0.05
Q16666	Gamma-interferon-inducible protein 16	IFI16	109.28	9.31	37	2.8	2	2	2	1.1	1.125	1.109	0.882	0.885	0.898	5.999	0.79934	0.05
Q5JVF3	PCI domain-containing protein 2	PCID2	54.65	8.78	70	5.3	2	2	2	1.139	1.077	1.087	0.93	0.888	0.878	5.999	0.816228	0.05
Q8N1F7	Nuclear pore complex protein Nup93	NUP93	103.11	5.5	658	24.2	36	21	22	1.117	1.088	1.08	0.917	0.893	0.904	5.999	0.82618	0.05
Q8NF37	Lysophosphatidylcholine acyltransferase 1	LPCAT1	65.47	5.77	111	5.1	3	2	3	1.105	1.185	1.04	0.923	0.834	0.912	5.999	0.801502	0.05
Q96EU6	Ribosomal RNA processing protein 36 homolog	RRP36	36.51	10.17	86	3.9	2	1	1	1.15	1.024	1.047	0.896	0.967	0.915	5.999	0.862465	0.05
Q86WA9	Sodium-independent sulfate anion transporter	SLC26A11	69.38	7.01	43	3.5	3	2	2	1.019	0.948	1.003	1.031	0.997	1.001	5.999	1.01987	0.474232
Q15276	Rab GTPase-binding effector protein 1	RABEP1	116.13	4.95	153	7.9	9	7	6	1.009	0.979	0.971	0.963	1.048	1.028	5.998	1.02704	0.418249
Q9UBW7	Zinc finger MYM-type protein 2	ZMYM2	182.01	5.95	92	2.3	4	3	3	1.066	1.108	1.081	0.853	0.937	0.953	5.998	0.842704	0.05
P11274	Breakpoint cluster region protein	BCR	162.55	6.62	121	4.9	8	6	5	0.917	0.85	0.935	1.145	1.111	1.04	5.998	1.21984	0.05
P25789	Proteasome subunit alpha type-4	PSMA4	35.94	7.57	257	24.1	14	6	6	1.147	1.102	1.063	0.888	0.939	0.859	5.998	0.81099	0.05
P49959	Double-strand break repair protein MRE11A	MRE11A	91.43	5.61	98	10.2	7	7	7	1.107	1.05	1.109	0.918	0.901	0.913	5.998	0.836497	0.05
P53779	Mitogen-activated protein kinase 10	MAPK10	61.2	6.33	43	3.4	2	2	2	1.134	1.048	1.077	0.891	0.938	0.91	5.998	0.840442	0.05
Q13347	Eukaryotic translation initiation factor 3 subunit I	EIF3I	41	5.38	334	19.7	13	6	6	1.062	1.037	1.089	0.921	0.916	0.973	5.998	0.88143	0.05
Q15717	ELAV-like protein 1	ELAVL1	40.59	9.23	410	24.8	22	7	7	1.14	1.169	1.121	0.868	0.844	0.856	5.998	0.748688	0.05
Q8N3R9	MAGUK p55 subfamily member 5	MPP5	89.45	5.77	75	7.1	6	5	5	1.137	1.068	1.07	0.888	0.91	0.925	5.998	0.83145	0.05
Q8TDJ6	DmX-like protein 2	DMXL2	379.63	5.93	218	5.9	18	17	17	0.894	0.909	0.898	1.138	1.08	1.079	5.998	1.22066	0.05
Q92945	Far upstream element-binding protein 2	KHSRP	80.69	6.85	901	38.8	51	24	22	1.128	1.139	1.111	0.883	0.86	0.877	5.998	0.775607	0.05
Q969G3	SWI/SNF-related matrix-associated actin-dependent regulator of chromatin subfamily E member 1	SMARCE1	53.78	4.85	140	14.6	12	5	5	0.944	0.974	0.965	0.988	1.033	1.094	5.998	1.08047	0.118761
Q96LT9	RNA-binding protein 40	RNPC3	70.22	7.61	24	1.7	2	1	1	0.943	1.1	1.16	0.814	1.012	0.969	5.998	0.872619	0.198821
Q9H2P0	Activity-dependent neuroprotector homeobox protein	ADNP	147.77	6.97	74	3	4	3	3	1.042	1.102	1.104	0.96	0.869	0.921	5.998	0.846675	0.05
Q9ULH1	Arf-GAP with SH3 domain, ANK repeat and PH domain-containing protein 1	ASAP1	149.76	6.95	47	2	2	2	2	1.116	1.102	1.059	0.894	0.886	0.941	5.998	0.830333	0.05
P02750	Leucine-rich alpha-2-glycoprotein	LRG1	41.59	6.45	61	6.1	2	2	2	1.038	1.174	1.178	0.817	0.893	0.898	5.998	0.769322	0.05
Q7L775	EPM2A-interacting protein 1	EPM2AIP1	77.14	5.77	230	14.3	12	7	8	1.138	1.055	1.094	0.912	0.864	0.935	5.998	0.824764	0.05
Q8WU76	Sec1 family domain-containing protein 2	SCFD2	84.81	6.21	124	8.8	8	6	6	1.073	1.027	1.088	0.933	0.942	0.935	5.998	0.88143	0.05
Q9BQG2	Peroxisomal NADH pyrophosphatase NUDT12	NUDT12	60.58	6.38	73	7.8	4	4	4	1.068	1.067	1.085	0.891	0.941	0.946	5.998	0.862733	0.05
O43684	Mitotic checkpoint protein BUB3	BUB3	41.71	6.36	253	23.8	11	6	6	0.998	1.037	1.017	0.997	0.956	0.992	5.997	0.964941	0.107111
Q14997	Proteasome activator complex subunit 4	PSME4	238.74	6.45	65	0.4	3	1	1	1.076	1.321	0.931	0.863	1.089	0.717	5.997	0.801983	0.234614
Q92879	CUGBP Elav-like family member 1	CELF1	58.16	8.7	52	4.5	3	2	1	1.105	1.076	1.115	0.899	0.857	0.945	5.997	0.819478	0.05
O95866	Protein G6b	G6B	28.21	9.68	85	11.6	5	3	3	0.709	0.823	0.753	1.244	1.267	1.201	5.997	1.62451	0.000244565
Q9BZG1	Ras-related protein Rab-34	RAB34	34.06	8.07	89	9.3	3	2	2	0.661	0.763	0.686	1.32	1.243	1.324	5.997	1.84218	0.00012663
Q86UW8	Hyaluronan and proteoglycan link protein 4	HAPLN4	45.69	9.12	172	16.9	6	5	6	0.59	0.562	0.612	1.406	1.396	1.431	5.997	2.39966	1.31564e-06
O14964	Hepatocyte growth factor-regulated tyrosine kinase substrate	HGS	95.64	5.84	186	11.1	11	9	9	0.945	0.998	0.987	0.99	1	1.077	5.997	1.04676	0.24113
P06730	Eukaryotic translation initiation factor 4E	EIF4E	29.2	5.79	55	22.1	4	4	4	1.015	1.107	1.025	0.906	1	0.944	5.997	0.905624	0.0685405
P08247	Synaptophysin	SYP	37.09	4.66	140	5.8	11	2	2	1.12	1.092	1.104	0.939	0.878	0.864	5.997	0.808504	0.05
P10644	cAMP-dependent protein kinase type I-alpha regulatory subunit	PRKAR1A	48.45	5.27	219	16.8	12	7	7	1.071	1.061	1.046	0.936	0.956	0.927	5.997	0.887036	0.05
P50579	Methionine aminopeptidase 2	METAP2	64.03	5.57	78	8.2	4	3	3	1.051	1.161	1.074	0.924	0.871	0.916	5.997	0.825015	0.05
P51659	Peroxisomal multifunctional enzyme type 2	HSD17B4	92.93	8.96	673	23.2	30	18	18	0.992	0.933	0.972	1.05	1.017	1.033	5.997	1.07007	0.05
Q01469	Fatty acid-binding protein, epidermal	FABP5	18.93	6.6	127	24.4	9	4	4	1.035	1.042	1.048	0.961	0.938	0.973	5.997	0.91904	0.05
Q13485	Mothers against decapentaplegic homolog 4	SMAD4	66.01	6.5	51	3.3	2	2	2	1.118	1.052	1.087	0.927	0.897	0.916	5.997	0.841265	0.05
Q15121	Astrocytic phosphoprotein PEA-15	PEA15	18.3	4.93	98	22.3	4	2	3	0.885	1.035	0.922	1.074	1.053	1.028	5.997	1.11013	0.137864
Q9BUT1	3-hydroxybutyrate dehydrogenase type 2	BDH2	30.95	7.56	87	9.8	4	3	2	1.123	1.08	1.041	0.959	0.92	0.874	5.997	0.848644	0.05
Q9NRX2	39S ribosomal protein L17, mitochondrial	MRPL17	21.93	10.12	34	13.1	3	3	3	1.062	1.075	1.02	0.971	0.941	0.928	5.997	0.899588	0.05
Q9NZU5	LIM and cysteine-rich domains protein 1	LMCD1	49.34	8.27	67	7.4	2	2	2	1.098	1.018	1.157	0.886	0.889	0.949	5.997	0.832264	0.05
P27824	Calnexin	CANX	80.81	4.47	668	27.2	45	17	17	1.089	1.046	1.055	0.968	0.909	0.93	5.997	0.879937	0.05
Q9Y296	Trafficking protein particle complex subunit 4	TRAPPC4	27.19	5.83	45	6.4	3	2	2	1.154	1.158	1.109	0.862	0.845	0.869	5.997	0.752996	0.05
O95155	Ubiquitin conjugation factor E4 B	UBE4B	161.9	6.13	104	3.4	4	4	4	1.114	1.071	1.089	0.892	0.921	0.909	5.996	0.831399	0.05
P51790	H(+)/Cl(-) exchange transporter 3	CLCN3	100.18	5.88	51	3.2	3	2	3	1.034	0.897	0.968	1.048	1.053	0.996	5.996	1.0683	0.232782
P61764	Syntaxin-binding protein 1	STXBP1	80.07	6.49	946	33	54	18	19	1.078	1.071	1.074	0.924	0.923	0.926	5.996	0.860379	0.05
Q02750	Dual specificity mitogen-activated protein kinase kinase 1	MAP2K1	50.4	6.18	71	7.9	6	5	4	1.115	1.201	1.069	0.883	0.852	0.876	5.996	0.771344	0.05
Q04917	14-3-3 protein eta	YWHAH	33.18	4.76	790	46.7	43	13	8	1.072	1.065	1.01	0.954	0.921	0.974	5.996	0.905307	0.05
Q16352	Alpha-internexin	INA	61.26	5.34	1787	49.3	92	26	23	1.011	0.992	0.972	1.02	0.979	1.022	5.996	1.01546	0.44379
Q7L8L6	FAST kinase domain-containing protein 5	FASTKD5	97.57	8.41	146	8.4	6	5	5	0.973	0.929	1.054	1.014	0.992	1.034	5.996	1.02842	0.531274
Q8N3P4	Vacuolar protein sorting-associated protein 8 homolog	VPS8	183.18	5.41	55	2.3	4	4	4	0.972	0.91	0.972	0.99	1.046	1.106	5.996	1.10091	0.0840884
Q92974	Rho guanine nucleotide exchange factor 2	ARHGEF2	122.7	6.89	49	3.7	3	3	3	0.914	0.902	0.973	1.082	1.097	1.028	5.996	1.14987	0.05
Q96KC8	DnaJ homolog subfamily C member 1	DNAJC1	76.56	8.77	47	1.4	2	1	1	1.127	1.098	1.081	0.885	0.863	0.942	5.996	0.813672	0.05
Q9BU02	Thiamine-triphosphatase	THTPA	27.78	4.75	90	10.9	2	2	2	1.045	1.059	1.207	0.851	0.881	0.953	5.996	0.810933	0.05
Q9H4B7	Tubulin beta-1 chain	TUBB1	54.53	5.05	509	22	31	9	6	0.947	0.98	1.03	0.945	1.005	1.089	5.996	1.02773	0.608215
Q9H553	Alpha-1,3/1,6-mannosyltransferase ALG2	ALG2	53.24	6.61	78	2.9	2	1	1	1.101	1.082	1.07	0.896	0.915	0.932	5.996	0.843222	0.05
Q9H6T3	RNA polymerase II-associated protein 3	RPAP3	93.37	6.46	224	15	10	8	9	1.022	1.015	1.066	0.961	0.95	0.982	5.996	0.932324	0.05
O15372	Eukaryotic translation initiation factor 3 subunit H	EIF3H	46.26	6.09	522	24.1	24	9	9	1.145	1.097	1.096	0.919	0.854	0.885	5.996	0.796285	0.05
O95870	Abhydrolase domain-containing protein 16A	ABHD16A	67.73	8.39	161	17	9	8	8	1.062	1.094	1.137	0.936	0.855	0.912	5.996	0.820832	0.05
P02730	Band 3 anion transport protein	SLC4A1	108.89	5.08	2579	17.3	106	14	15	0.846	0.819	0.837	1.183	1.123	1.188	5.996	1.39648	0.05
P83916	Chromobox protein homolog 1	CBX1	28.16	4.85	78	9.2	7	2	2	1.034	1.012	0.996	0.998	0.973	0.983	5.996	0.971072	0.100757
Q06830	Peroxiredoxin-1	PRDX1	26.91	8.27	860	44.7	47	9	6	1.173	1.184	1.127	0.854	0.839	0.819	5.996	0.72101	0.05
Q08623	Pseudouridine-5~-phosphatase	HDHD1	29.3	5.18	82	4.4	2	1	1	1.114	1.115	1.053	0.943	0.901	0.87	5.996	0.826935	0.05
Q16576	Histone-binding protein RBBP7	RBBP7	53.86	4.89	317	16	14	5	2	0.99	1.065	1.062	0.939	1.009	0.931	5.996	0.923645	0.0851517
Q5BKZ1	DBIRD complex subunit ZNF326	ZNF326	75.12	5.08	182	13.6	8	6	6	1.033	1.037	1.004	0.959	1.009	0.954	5.996	0.950553	0.0825669
Q96CW1	AP-2 complex subunit mu	AP2M1	58.9	9.57	146	14.5	8	5	6	1.027	1.144	1.013	0.929	0.997	0.886	5.996	0.883166	0.0818947
Q9H2X9	Solute carrier family 12 member 5	SLC12A5	138.47	6.29	94	4.5	5	5	3	1.012	0.95	0.908	1.007	1.106	1.013	5.996	1.0892	0.124959
Q9HA64	Ketosamine-3-kinase	FN3KRP	38.51	6.84	123	16.5	8	5	5	1.042	1.035	1.079	0.922	0.955	0.963	5.996	0.899873	0.05
Q9UHD2	Serine/threonine-protein kinase TBK1	TBK1	97.05	6.32	230	13.9	11	8	10	0.978	1.026	1.029	0.991	0.954	1.018	5.996	0.976921	0.401424
Q9UK45	U6 snRNA-associated Sm-like protein LSm7	LSM7	14.23	5.1	79	20.4	6	2	2	1.194	1.207	1.144	0.837	0.798	0.816	5.996	0.691396	0.05
Q16795	NADH dehydrogenase [ubiquinone] 1 alpha subcomplex subunit 9, mitochondrial	NDUFA9	47.92	9.81	103	5.3	4	2	2	1.035	0.959	1.001	0.988	0.948	1.065	5.996	1.002	0.963611
O60271	C-Jun-amino-terminal kinase-interacting protein 4	SPAG9	167.08	5.05	172	7.3	14	11	6	1.117	1.059	1.062	0.942	0.896	0.919	5.995	0.851452	0.05
Q14697	Neutral alpha-glucosidase AB	GANAB	113.68	5.74	691	28	48	22	24	1.147	1.143	1.1	0.875	0.875	0.855	5.995	0.768437	0.05
Q9BY43	Charged multivesicular body protein 4a	CHMP4A	30.58	4.65	61	7.2	4	2	2	1.215	1.217	1.237	0.76	0.759	0.807	5.995	0.63396	0.05
Q5SGD2	Protein phosphatase 1L	PPM1L	47.21	5.58	147	17.2	8	5	6	1.273	1.256	1.232	0.756	0.726	0.752	5.995	0.593991	4.69625e-06
O60306	Intron-binding protein aquarius	AQR	190.6	5.96	121	8.8	12	11	12	1.039	0.989	1.057	0.969	0.974	0.967	5.995	0.943274	0.101628
O60725	Protein-S-isoprenylcysteine O-methyltransferase	ICMT	34.38	8.13	36	2.8	2	1	1	1.063	1.079	1.09	0.901	0.917	0.945	5.995	0.854889	0.05
P07814	Bifunctional glutamate/proline--tRNA ligase	EPRS	206.22	7.02	1216	21.4	56	27	28	1.083	1.075	1.058	0.925	0.932	0.922	5.995	0.864117	0.05
P20700	Lamin-B1	LMNB1	75.82	5.11	1177	41.6	61	27	22	1.091	1.065	1.044	0.928	0.904	0.963	5.995	0.873437	0.05
P52566	Rho GDP-dissociation inhibitor 2	ARHGDIB	28.53	5.1	167	27.9	8	6	6	1.102	1.018	1.069	0.896	0.979	0.931	5.995	0.8799	0.05
P52803	Ephrin-A5	EFNA5	29.2	5.97	22	6.1	2	2	2	1.096	1.064	1.076	0.927	0.925	0.907	5.995	0.852596	0.05
P55884	Eukaryotic translation initiation factor 3 subunit B	EIF3B	105.2	4.89	400	18.9	24	14	13	1.06	1.028	1.049	0.937	0.955	0.966	5.995	0.911062	0.05
Q13243	Serine/arginine-rich splicing factor 5	SRSF5	35.48	11.59	217	21.7	13	6	5	0.995	0.998	1.002	0.998	1.008	0.994	5.995	1.00167	0.743537
Q16555	Dihydropyrimidinase-related protein 2	DPYSL2	70.27	5.95	1592	34.3	66	15	12	0.982	1.031	0.966	1.01	1.048	0.958	5.995	1.01242	0.725843
Q9NXC2	Glucose-fructose oxidoreductase domain-containing protein 1	GFOD1	48.05	5.63	91	5.1	3	2	2	0.926	0.999	0.923	1.057	1.036	1.054	5.995	1.10499	0.05
Q9P260	LisH domain and HEAT repeat-containing protein KIAA1468	KIAA1468	149.21	5.28	52	1.2	3	2	2	1.067	0.972	1.011	0.978	1.001	0.966	5.995	0.965574	0.333286
Q9Y2D4	Exocyst complex component 6B	EXOC6B	108.86	6.03	114	5.7	7	5	4	0.952	0.914	0.874	1.117	1.055	1.083	5.995	1.18796	0.05
O00562	Membrane-associated phosphatidylinositol transfer protein 1	PITPNM1	145.3	5.64	117	6	6	6	5	1.002	1.007	1.015	1.048	0.964	0.959	5.995	0.982474	0.603912
O95970	Leucine-rich glioma-inactivated protein 1	LGI1	73.91	8.5	58	3.6	2	2	2	1.084	1.02	1.085	0.845	0.983	0.978	5.995	0.8799	0.0879003
P05155	Plasma protease C1 inhibitor	SERPING1	62.22	6.09	113	6.4	6	3	3	1.241	1.206	1.196	0.812	0.77	0.77	5.995	0.645622	0.05
P36543	V-type proton ATPase subunit E 1	ATP6V1E1	31.69	7.71	219	37.2	14	9	9	1.059	1.085	1.028	0.96	0.911	0.952	5.995	0.889975	0.05
Q13449	Limbic system-associated membrane protein	LSAMP	42.01	6.55	135	9.8	5	4	4	1.034	1.056	1.048	0.933	0.962	0.962	5.995	0.910453	0.05
Q14247	Src substrate cortactin	CTTN	73.64	5.24	763	28.9	32	15	15	1.027	1.032	1.026	0.978	0.944	0.988	5.995	0.943274	0.05
Q16773	Kynurenine--oxoglutarate transaminase 1	CCBL1	53.46	6.02	53	7.6	3	3	3	0.947	0.997	1.031	0.999	1.005	1.016	5.995	1.01513	0.603915
Q969V5	Mitochondrial ubiquitin ligase activator of NFKB 1	MUL1	46.07	8.46	89	8.8	3	3	3	0.962	0.943	0.837	1.087	1.042	1.124	5.995	1.18636	0.05
Q9BT78	COP9 signalosome complex subunit 4	COPS4	51.8	5.57	300	25.6	10	8	9	1.136	1.116	1.126	0.913	0.832	0.872	5.995	0.774719	0.05
Q9BW83	Intraflagellar transport protein 27 homolog	IFT27	23.96	5.28	61	11.3	4	3	3	1.143	1.034	1.158	0.885	0.869	0.906	5.995	0.797601	0.05
P05091	Aldehyde dehydrogenase, mitochondrial	ALDH2	63.73	6.63	860	25	41	11	8	0.926	1.141	1.061	0.876	1.094	0.896	5.994	0.91624	0.404517
P52948	Nuclear pore complex protein Nup98-Nup96	NUP98	218.53	5.98	324	7.5	16	13	13	1.085	1.067	1.067	0.91	0.911	0.954	5.994	0.862069	0.05
Q0VDF9	Heat shock 70 kDa protein 14	HSPA14	62.78	5.41	87	5.5	3	3	3	1.114	1.073	1.074	0.929	0.875	0.929	5.994	0.838086	0.05
Q3SYG4	Protein PTHB1	BBS9	111.19	5.35	29	1.7	2	2	2	1.119	1.097	1.048	0.952	0.916	0.862	5.994	0.836397	0.05
Q86TM6	E3 ubiquitin-protein ligase synoviolin	SYVN1	71.36	6.47	144	5.3	7	4	4	1.092	1.064	1.122	0.884	0.92	0.912	5.994	0.828554	0.05
Q96QG7	Myotubularin-related protein 9	MTMR9	70.35	5.98	43	3.6	2	2	2	1.123	1.106	1.064	0.879	0.9	0.922	5.994	0.820225	0.05
Q9UDX3	SEC14-like protein 4	SEC14L4	53.03	6.16	43	2	2	1	1	1.184	1.043	1.064	0.957	0.847	0.899	5.994	0.821331	0.05
Q9ULP9	TBC1 domain family member 24	TBC1D24	71.58	7.14	107	5.9	4	3	3	1.087	1.079	1.089	0.927	0.896	0.916	5.994	0.841475	0.05
O14617	AP-3 complex subunit delta-1	AP3D1	157.97	8.69	159	8	9	8	8	1.128	1.155	1.159	0.847	0.848	0.857	5.994	0.741429	0.05
O75368	SH3 domain-binding glutamic acid-rich-like protein	SH3BGRL	14.83	5.22	119	41.2	8	4	4	0.981	0.964	0.94	1.032	1.035	1.042	5.994	1.07764	0.05
O95376	E3 ubiquitin-protein ligase ARIH2	ARIH2	66.02	5.4	58	4.9	2	2	2	1.154	0.998	1.074	0.909	0.914	0.945	5.994	0.858029	0.0693461
P16083	Ribosyldihydronicotinamide dehydrogenase [quinone]	NQO2	29.57	5.88	69	4.8	2	1	1	1.112	1.037	1.041	0.903	0.947	0.954	5.994	0.878997	0.05
P21397	Amine oxidase [flavin-containing] A	MAOA	69.09	7.94	661	24.9	37	12	12	0.878	0.896	0.872	1.104	1.119	1.125	5.994	1.26531	0.05
P26368	Splicing factor U2AF 65 kDa subunit	U2AF2	60.45	9.19	101	17.9	11	7	7	1.059	1.19	1.037	0.848	0.961	0.899	5.994	0.824102	0.05
P40616	ADP-ribosylation factor-like protein 1	ARL1	23.27	5.63	134	19.9	3	3	3	1.352	1.134	1.129	0.786	0.713	0.88	5.994	0.658091	0.05
P45985	Dual specificity mitogen-activated protein kinase kinase 4	MAP2K4	51.59	8.28	88	12.8	5	5	5	1.09	1.08	1.091	0.915	0.911	0.907	5.994	0.838086	0.05
P50502	Hsc70-interacting protein	ST13	49.27	5.18	284	24.7	15	8	8	0.933	0.958	1.013	1.007	1.024	1.059	5.994	1.06405	0.103744
Q06787	Fragile X mental retardation protein 1	FMR1	81.33	6.99	51	3.5	4	3	2	0.984	0.96	0.898	1.101	1.052	0.999	5.994	1.10908	0.0582884
Q12888	Tumor suppressor p53-binding protein 1	TP53BP1	239.79	4.62	1301	23	58	35	36	1.028	0.994	1.009	0.993	0.96	1.01	5.994	0.977565	0.278021
Q53T59	HCLS1-binding protein 3	HS1BP3	49.28	4.89	45	6.9	2	2	2	1.128	1.131	0.983	0.864	1.002	0.886	5.994	0.848859	0.0667737
Q8WUA2	Peptidyl-prolyl cis-trans isomerase-like 4	PPIL4	70.77	5.63	57	3.7	2	2	2	1.08	1.11	1.142	0.894	0.913	0.855	5.994	0.79892	0.05
Q8WXF1	Paraspeckle component 1	PSPC1	64.55	6.26	364	21.8	24	12	11	1.044	1.041	1.041	0.968	0.932	0.968	5.994	0.917466	0.05
Q96A35	39S ribosomal protein L24, mitochondrial	MRPL24	28.91	9.33	168	15.7	6	3	3	1.009	0.978	1.073	0.956	0.995	0.983	5.994	0.958824	0.269878
Q9H0E2	Toll-interacting protein	TOLLIP	32.78	5.68	295	23	16	6	6	0.931	0.939	0.961	1.084	1.034	1.045	5.994	1.11727	0.05
Q9H2G2	STE20-like serine/threonine-protein kinase	SLK	172.34	5.08	280	13.5	19	16	16	1.106	1.061	1.038	0.93	0.929	0.93	5.994	0.870203	0.05
Q9UEE9	Craniofacial development protein 1	CFDP1	42.74	4.77	100	12.4	6	4	4	1.132	1.138	1.124	0.834	0.891	0.875	5.994	0.766058	0.05
Q9Y5A9	YTH domain-containing family protein 2	YTHDF2	70.72	8.87	89	3.1	3	1	2	1.1	0.982	1.052	0.974	0.95	0.936	5.994	0.912572	0.10523
Q9UGT4	Sushi domain-containing protein 2	SUSD2	96.1	5.84	154	8.3	7	6	6	0.817	0.669	0.716	1.292	1.2	1.299	5.993	1.72162	0.000608755
O00142	Thymidine kinase 2, mitochondrial	TK2	34.31	8.71	40	6	3	2	2	0.852	0.87	0.818	1.202	1.123	1.128	5.993	1.35945	0.05
O00408	cGMP-dependent 3~,5~-cyclic phosphodiesterase	PDE2A	118.36	5.22	37	1.8	2	2	2	1.074	1.023	1.056	0.896	1.002	0.942	5.993	0.900729	0.0576941
O75822	Eukaryotic translation initiation factor 3 subunit J	EIF3J	38.1	4.72	59	7.8	2	2	2	1.099	1.052	1.07	0.909	0.902	0.961	5.993	0.860602	0.05
P00390	Glutathione reductase, mitochondrial	GSR	64.81	8.74	350	15.7	19	7	8	1.101	1.083	1.087	0.912	0.908	0.902	5.993	0.832161	0.05
P07602	Prosaposin	PSAP	69.98	5.06	171	3.2	7	2	2	1.016	0.93	0.936	1.083	1.014	1.014	5.993	1.07946	0.103785
P15882	N-chimaerin	CHN1	61.33	6.51	176	14.8	7	6	6	1.155	1.012	1.093	0.891	0.923	0.919	5.993	0.838344	0.05
Q00169	Phosphatidylinositol transfer protein alpha isoform	PITPNA	38.66	6.11	69	16.3	5	4	4	1.122	0.968	1.041	0.973	0.953	0.936	5.993	0.914085	0.1757
Q4ZIN3	Membralin	TMEM259	70.65	5.14	52	2.7	2	2	2	1.106	1.066	1.17	0.885	0.879	0.887	5.993	0.793238	0.05
Q8IWF6	Protein DENND6A	DENND6A	80.76	8.52	28	1	2	1	1	1.106	0.959	1.209	0.939	0.792	0.988	5.993	0.830483	0.121786
Q99436	Proteasome subunit beta type-7	PSMB7	34.41	7.57	235	14.4	14	4	4	1.14	1.111	1.147	0.878	0.855	0.862	5.993	0.763685	0.05
Q9H2U1	ATP-dependent RNA helicase DHX36	DHX36	131.87	7.58	75	4.6	4	4	4	1.176	1.113	1.043	0.963	0.777	0.921	5.993	0.798619	0.05
Q9H6R4	Nucleolar protein 6	NOL6	137.31	7.42	112	3.8	5	4	3	1.035	1.157	1.083	0.875	0.854	0.989	5.993	0.829924	0.05
P09104	Gamma-enolase	ENO2	53.77	4.91	929	32.3	42	11	7	0.967	0.984	0.985	1.002	1.012	1.043	5.993	1.04121	0.0636891
P46063	ATP-dependent DNA helicase Q1	RECQL	88.42	8.12	135	7.4	8	6	6	1.06	1.084	1.045	0.93	0.938	0.936	5.993	0.879272	0.05
P60981	Destrin	DSTN	23.99	8.06	260	16.4	14	3	3	1.108	1.138	1.063	0.909	0.885	0.89	5.993	0.811121	0.05
Q4G148	Glucoside xylosyltransferase 1	GXYLT1	57.98	8.92	56	5.2	3	2	3	1.162	1.157	1.09	0.893	0.857	0.834	5.993	0.757994	0.05
Q96K19	E3 ubiquitin-protein ligase RNF170	RNF170	30.94	5.34	86	15.1	5	4	4	0.953	1.027	1.013	0.944	1.041	1.015	5.993	1.00234	0.952673
Q9BY67	Cell adhesion molecule 1	CADM1	53.52	4.94	184	5	7	2	2	1.147	1.178	1.195	0.794	0.834	0.845	5.993	0.702557	0.05
A5YKK6	CCR4-NOT transcription complex subunit 1	CNOT1	296.15	6.65	226	6.7	15	14	16	1.096	1.038	1.073	0.901	0.929	0.955	5.992	0.868413	0.05
E9PAV3	Nascent polypeptide-associated complex subunit alpha, muscle-specific form	NACA	240.35	9.6	440	3	15	5	5	1.158	1.145	1.094	0.849	0.873	0.873	5.992	0.763909	0.05
O15144	Actin-related protein 2/3 complex subunit 2	ARPC2	40.38	6.84	580	27	25	8	9	1.014	0.967	0.975	1	1.008	1.028	5.992	1.02706	0.204025
O94888	UBX domain-containing protein 7	UBXN7	61.41	5.06	72	6.1	3	3	3	1.056	1.06	1.156	0.876	0.936	0.908	5.992	0.831296	0.05
P0CW22	40S ribosomal protein S17-like	RPS17L	18.81	9.85	366	60	15	6	6	0.983	1.317	1.099	0.754	1.037	0.802	5.992	0.762871	0.110985
P16298	Serine/threonine-protein phosphatase 2B catalytic subunit beta isoform	PPP3CB	64.94	5.6	149	9.9	8	5	2	1.193	1.226	1.114	0.814	0.83	0.815	5.992	0.696009	0.05
Q4G0J3	La-related protein 7	LARP7	88	9.57	61	4.1	2	2	2	1.109	1.084	1.056	0.907	0.873	0.963	5.992	0.84426	0.05
Q9BUJ2	Heterogeneous nuclear ribonucleoprotein U-like protein 1	HNRNPUL1	104.73	6.49	258	8.9	14	8	8	1.243	1.187	1.153	0.827	0.762	0.82	5.992	0.672342	0.05
Q9H9S5	Fukutin-related protein	FKRP	56.37	7.05	56	6.7	4	4	4	1.066	1.102	1.091	0.892	0.91	0.931	5.992	0.838601	0.05
Q9Y4D8	Probable E3 ubiquitin-protein ligase HECTD4	HECTD4	490.31	5.82	52	0.9	4	4	4	1.004	1.034	1.075	0.929	0.978	0.972	5.992	0.924831	0.05
O00764	Pyridoxal kinase	PDXK	38.74	5.75	300	20.5	15	6	6	1.137	1.124	1.186	0.867	0.817	0.861	5.992	0.738323	0.05
O75438	NADH dehydrogenase [ubiquinone] 1 beta subcomplex subunit 1	NDUFB1	8.16	9.04	52	19	3	1	1	1.072	1.094	0.934	0.93	0.989	0.973	5.992	0.932903	0.299139
O95197	Reticulon-3	RTN3	131.27	4.85	77	2.3	5	2	2	0.944	0.999	0.958	0.998	0.994	1.099	5.992	1.06549	0.199025
P04632	Calpain small subunit 1	CAPNS1	30.76	5.05	384	10.8	14	3	3	0.971	0.968	0.995	1.023	0.985	1.05	5.992	1.04226	0.146666
P16930	Fumarylacetoacetase	FAH	51.33	6.46	181	5	5	2	2	1.392	0.867	0.844	1.303	0.833	0.753	5.992	0.931034	0.787862
P28065	Proteasome subunit beta type-9	PSMB9	24.51	4.93	82	6.8	2	1	1	1.126	1.041	1.161	0.914	0.857	0.893	5.992	0.800481	0.05
P40429	60S ribosomal protein L13a	RPL13A	30.27	10.94	111	29.1	12	6	7	0.991	1.068	1.024	0.949	1.009	0.951	5.992	0.943561	0.124041
Q01484	Ankyrin-2	ANK2	499.89	5.03	567	6.9	28	23	19	1.012	0.968	0.991	0.975	1.027	1.019	5.992	1.01683	0.465448
Q5JSH3	WD repeat-containing protein 44	WDR44	119.06	5.29	186	9.3	9	7	7	1.015	0.996	0.972	1.006	0.971	1.032	5.992	1.00872	0.711117
Q8N806	Putative E3 ubiquitin-protein ligase UBR7	UBR7	57.36	4.7	87	9.6	4	4	4	1.204	1.027	1.073	0.923	0.888	0.877	5.992	0.813559	0.0526898
Q92922	SWI/SNF complex subunit SMARCC1	SMARCC1	142.09	5.51	132	7.1	10	8	5	1.095	1.141	1.11	0.842	0.91	0.894	5.992	0.790795	0.05
Q96SN7	Protein orai-2	ORAI2	30.84	8.7	31	2.8	3	1	1	1.027	1.198	0.978	0.952	0.903	0.934	5.992	0.870746	0.169518
Q9C0C2	182 kDa tankyrase-1-binding protein	TNKS1BP1	196.69	4.77	313	9.6	17	13	13	0.994	0.979	0.992	1.03	0.982	1.015	5.992	1.02091	0.279671
Q9NP58	ATP-binding cassette sub-family B member 6, mitochondrial	ABCB6	98.98	8.75	105	4.6	6	4	4	0.983	1.026	1.02	0.978	1.003	0.982	5.992	0.978211	0.246012
Q9NQT5	Exosome complex component RRP40	EXOSC3	33.45	8.39	34	4	2	1	1	1.091	1.057	1.062	0.914	0.924	0.944	5.992	0.866667	0.05
Q9NQX7	Integral membrane protein 2C	ITM2C	33.53	8.16	100	10.9	2	2	2	1.062	1.206	1.234	0.779	0.838	0.873	5.992	0.711022	0.05
Q9NRS6	Sorting nexin-15	SNX15	42.22	5.09	38	6.7	3	3	3	1.058	1.084	1.061	0.908	0.93	0.951	5.992	0.870746	0.05
Q9UG63	ATP-binding cassette sub-family F member 2	ABCF2	84.42	6.95	119	8.3	6	6	6	0.985	0.994	0.987	1.009	0.98	1.037	5.992	1.02023	0.347826
O00391	Sulfhydryl oxidase 1	QSOX1	91.11	9.13	162	9.5	11	6	7	1.093	1.111	1.071	0.912	0.886	0.919	5.992	0.829618	0.05
P23381	Tryptophan--tRNA ligase, cytoplasmic	WARS	61.72	5.83	299	14.9	14	6	7	1.202	1.12	1.175	0.832	0.813	0.85	5.992	0.713469	0.05
Q86YT6	E3 ubiquitin-protein ligase MIB1	MIB1	126.67	6.47	39	3.7	4	4	4	0.972	0.97	0.955	1.051	1.013	1.031	5.992	1.06835	0.05
Q9H9A6	Leucine-rich repeat-containing protein 40	LRRC40	76.97	6.04	35	4.5	3	3	3	1.049	1.03	1.07	0.935	0.962	0.946	5.992	0.902826	0.05
Q9Y2E5	Epididymis-specific alpha-mannosidase	MAN2B2	117.63	6.74	58	2.9	3	3	3	1.16	1.096	1.07	0.99	0.812	0.863	5.991	0.801263	0.05
O00151	PDZ and LIM domain protein 1	PDLIM1	41.78	6.56	299	27.1	15	8	8	0.831	0.792	0.827	1.203	1.162	1.176	5.991	1.44531	0.05
O43493	Trans-Golgi network integral membrane protein 2	TGOLN2	63	5.53	86	13.1	5	4	6	1.064	1.079	1.176	0.863	0.897	0.912	5.991	0.805062	0.05
O60831	PRA1 family protein 2	PRAF2	20.73	9.41	106	6.2	4	1	1	1.097	1.143	1.222	0.841	0.804	0.884	5.991	0.730503	0.05
O95456	Proteasome assembly chaperone 1	PSMG1	38.21	6.88	58	4.9	2	1	1	1.057	1.087	1.176	0.872	0.875	0.924	5.991	0.804518	0.05
P13232	Interleukin-7	IL7	25.1	8.87	45	4	3	1	1	0.979	1.182	1.033	0.897	1.036	0.864	5.991	0.875704	0.176473
P51532	Transcription activator BRG1	SMARCA4	215.12	7.83	89	5.1	8	8	3	1.062	1.036	1.086	0.955	0.924	0.928	5.991	0.881595	0.05
Q10567	AP-1 complex subunit beta-1	AP1B1	119.92	4.94	791	20.5	44	19	8	1.08	1.093	1.032	0.945	0.942	0.899	5.991	0.869267	0.05
Q56VL3	OCIA domain-containing protein 2	OCIAD2	20.26	9.24	185	27.3	12	4	5	0.832	0.813	0.749	1.235	1.215	1.147	5.991	1.50251	0.05
Q8NFW8	N-acylneuraminate cytidylyltransferase	CMAS	56.59	8.16	273	12.9	17	6	6	1.05	1.081	1.066	0.916	0.926	0.952	5.991	0.873944	0.05
Q9UHI6	Probable ATP-dependent RNA helicase DDX20	DDX20	103.52	6.49	47	1.7	2	2	2	1.123	1.096	1.076	0.93	0.881	0.885	5.991	0.818209	0.05
O15258	Protein RER1	RER1	26.04	9.56	65	13.3	2	2	2	1.092	1.06	1.074	0.868	1.047	0.85	5.991	0.857099	0.131621
P07900	Heat shock protein HSP 90-alpha	HSP90AA1	103.57	4.94	3208	37.7	162	28	17	1.093	1.15	1.089	0.87	0.911	0.878	5.991	0.798019	0.05
P08237	ATP-dependent 6-phosphofructokinase, muscle type	PFKM	96.53	8.23	619	19.6	23	12	10	0.988	1	1.019	0.987	1.006	0.991	5.991	0.992351	0.520385
P11169	Solute carrier family 2, facilitated glucose transporter member 3	SLC2A3	58.24	6.84	215	9.3	10	4	4	0.919	0.858	0.919	1.136	1.121	1.038	5.991	1.22218	0.05
P22392	Nucleoside diphosphate kinase B	NME2	20.61	8.52	497	56.6	36	9	2	1.02	1.123	1.146	0.918	0.84	0.944	5.991	0.821526	0.05
P30084	Enoyl-CoA hydratase, mitochondrial	ECHS1	37.55	8.34	645	42.1	35	11	11	0.891	0.859	0.892	1.131	1.103	1.115	5.991	1.2676	0.05
P42285	Superkiller viralicidic activity 2-like 2	SKIV2L2	139.15	6.12	87	6.6	8	8	8	1.06	1.099	1.077	0.888	0.918	0.949	5.991	0.85136	0.05
P50213	Isocitrate dehydrogenase [NAD] subunit alpha, mitochondrial	IDH3A	45.75	6.47	589	26.8	30	9	9	0.836	0.878	0.843	1.15	1.126	1.158	5.991	1.34298	0.05
Q13363	C-terminal-binding protein 1	CTBP1	51.4	6.28	179	13.9	11	7	4	1.083	1.049	1.096	0.913	0.939	0.911	5.991	0.855948	0.05
Q6YHK3	CD109 antigen	CD109	181.29	5.59	79	2.8	2	2	4	1.134	1.048	1.135	0.883	0.917	0.874	5.991	0.80615	0.05
Q8NEZ3	WD repeat-containing protein 19	WDR19	174.05	5.94	71	4.1	5	5	6	0.943	0.939	0.998	1.039	1.04	1.032	5.991	1.08021	0.0537548
Q92576	PHD finger protein 3	PHF3	276.71	6.52	29	1.4	3	3	3	1.023	0.969	1.032	1.007	0.96	1	5.991	0.981151	0.485029
Q92878	DNA repair protein RAD50	RAD50	188.97	6.48	595	17.7	35	25	25	1.154	1.106	1.092	0.893	0.864	0.882	5.991	0.787291	0.05
Q9HBR0	Putative sodium-coupled neutral amino acid transporter 10	SLC38A10	131.83	5.51	176	6.4	8	6	6	1.205	1.138	1.215	0.814	0.819	0.8	5.991	0.683811	0.05
Q9Y2R0	Cytochrome c oxidase assembly factor 3 homolog, mitochondrial	COA3	12.87	9.59	192	35.8	9	4	4	0.837	0.908	0.813	1.187	1.095	1.151	5.991	1.34206	0.05
Q9Y6A4	Cilia- and flagella-associated protein 20	CFAP20	26.83	9.78	81	10.4	3	2	2	1.069	1.122	1.208	0.753	0.872	0.967	5.991	0.762577	0.05
P27694	Replication protein A 70 kDa DNA-binding subunit	RPA1	78.35	6.92	323	14.9	13	9	9	1.22	1.195	1.203	0.804	0.777	0.791	5.99	0.655611	0.05
Q08752	Peptidyl-prolyl cis-trans isomerase D	PPID	50.3	6.77	136	20.5	12	9	7	1.064	1.111	1.078	0.905	0.932	0.9	5.99	0.841377	0.05
Q6Y1H2	Very-long-chain (3R)-3-hydroxyacyl-CoA dehydratase 2	HACD2	31.61	9.55	107	11.4	4	3	3	1.111	1.161	1.163	0.851	0.831	0.873	5.99	0.743814	0.05
Q92925	SWI/SNF-related matrix-associated actin-dependent regulator of chromatin subfamily D member 2	SMARCD2	66.22	9.66	105	8.5	5	4	4	1.205	1.124	1.104	0.861	0.836	0.86	5.99	0.74483	0.05
Q96TA1	Niban-like protein 1	FAM129B	94.68	5.82	128	4.6	4	3	3	1.183	1.022	1.091	0.926	0.884	0.884	5.99	0.817354	0.05
P33121	Long-chain-fatty-acid--CoA ligase 1	ACSL1	89.23	6.81	286	17.9	26	14	12	1.324	1.257	1.275	0.714	0.68	0.74	5.99	0.553423	2.68978e-05
Q5XKP0	MICOS complex subunit MIC13	MIC13	15.2	9.44	53	11.9	3	2	2	0.722	0.765	0.795	1.207	1.256	1.245	5.99	1.62489	5.15975e-05
O43242	26S proteasome non-ATPase regulatory subunit 3	PSMD3	69.3	8.47	524	21.9	22	11	12	1.041	1.027	1.037	0.958	0.956	0.971	5.99	0.929147	0.05
O75558	Syntaxin-11	STX11	38.44	6.11	128	11.5	4	3	3	0.777	0.836	0.855	1.145	1.133	1.244	5.99	1.42707	0.05
P07205	Phosphoglycerate kinase 2	PGK2	55.25	8.74	416	17.7	33	8	3	1.049	1.105	1.058	0.893	0.921	0.964	5.99	0.864882	0.05
P20929	Nebulin	NEB	965.6	9.11	32	0.4	3	3	3	1.065	1.213	1.225	0.759	0.867	0.861	5.99	0.709963	0.05
P56556	NADH dehydrogenase [ubiquinone] 1 alpha subcomplex subunit 6	NDUFA6	21.41	10.15	74	9.7	5	2	2	1.063	0.942	0.938	1.013	1.006	1.028	5.99	1.03534	0.488022
Q07954	Prolow-density lipoprotein receptor-related protein 1	LRP1	563.02	5.16	603	6.5	41	27	27	0.981	0.984	0.987	1.012	0.994	1.032	5.99	1.02913	0.117257
Q10471	Polypeptide N-acetylgalactosaminyltransferase 2	GALNT2	73.45	8.63	142	14.5	13	9	9	1.153	1.087	1.096	0.896	0.889	0.869	5.99	0.795564	0.05
Q5SW79	Centrosomal protein of 170 kDa	CEP170	203.77	6.64	77	3	5	5	5	1.016	0.966	0.976	0.939	1.038	1.055	5.99	1.02502	0.579057
Q6PGP7	Tetratricopeptide repeat protein 37	TTC37	206.59	7.47	287	8.3	13	11	13	1.08	1.087	1.078	0.912	0.888	0.945	5.99	0.845917	0.05
Q8NBJ5	Procollagen galactosyltransferase 1	COLGALT1	78.58	6.85	140	8.8	6	5	5	0.977	0.95	0.976	1.037	1.008	1.042	5.99	1.06338	0.05
Q8WX92	Negative elongation factor B	NELFB	74.99	5.77	57	2.9	2	2	2	1.115	1.091	0.987	0.927	0.943	0.927	5.99	0.875979	0.0757371
Q9C037	E3 ubiquitin-protein ligase TRIM4	TRIM4	66.07	8.4	40	4.8	3	3	3	1.027	1.059	1.097	0.916	0.943	0.948	5.99	0.881872	0.05
Q9H0D6	5~-3~ exoribonuclease 2	XRN2	122.26	7.26	184	7.6	9	6	7	1.124	1.129	1.072	0.899	0.874	0.892	5.99	0.801504	0.05
Q9H0P0	Cytosolic 5~-nucleotidase 3A	NT5C3A	45.37	6.67	129	15.2	5	5	5	1.033	1.01	1.001	0.989	0.969	0.988	5.99	0.967806	0.0546382
Q9NQG5	Regulation of nuclear pre-mRNA domain-containing protein 1B	RPRD1B	43.87	5.73	204	18.1	6	4	4	1.032	1.049	1.121	0.907	0.9	0.981	5.99	0.870706	0.05
Q9UI30	Multifunctional methyltransferase subunit TRM112-like protein	TRMT112	15.22	5.21	88	16.8	3	2	2	0.952	0.965	0.968	1.043	1.021	1.041	5.99	1.07626	0.05
O94985	Calsyntenin-1	CLSTN1	122.44	4.81	93	3.7	5	4	3	1.226	1.14	1.084	0.881	0.817	0.842	5.99	0.736232	0.05
O95263	High affinity cAMP-specific and IBMX-insensitive 3~,5~-cyclic phosphodiesterase 8B	PDE8B	110.54	6.35	25	1.6	2	2	2	1.041	1.081	1.075	0.917	0.948	0.928	5.99	0.873632	0.05
Q70CQ3	Ubiquitin carboxyl-terminal hydrolase 30	USP30	64.99	8.57	67	1.9	4	1	1	1.083	1.038	1.087	0.927	0.911	0.944	5.99	0.867207	0.05
Q8N163	Cell cycle and apoptosis regulator protein 2	CCAR2	114.01	5.14	314	13.9	18	11	12	1.095	1.118	1.105	0.887	0.895	0.89	5.99	0.805304	0.05
O00232	26S proteasome non-ATPase regulatory subunit 12	PSMD12	63.35	7.53	185	10.7	9	6	6	1.056	1.039	0.986	1.02	0.917	0.972	5.99	0.944174	0.198695
P40937	Replication factor C subunit 5	RFC5	43.8	6.72	95	11.8	4	4	5	1.018	1.041	0.989	0.942	1.003	0.996	5.989	0.964895	0.222413
Q93088	Betaine--homocysteine S-methyltransferase 1	BHMT	52.76	6.58	444	9.9	18	2	2	1.209	1.172	0.921	1.038	0.953	0.696	5.989	0.813749	0.209861
Q9NVG8	TBC1 domain family member 13	TBC1D13	52.65	5.11	148	9.5	7	3	4	0.923	0.914	0.917	1.102	1.047	1.086	5.989	1.17466	0.05
O00534	von Willebrand factor A domain-containing protein 5A	VWA5A	98.4	6.13	280	10.3	13	7	7	0.951	0.996	0.968	1.049	0.986	1.039	5.989	1.05455	0.097135
O60762	Dolichol-phosphate mannosyltransferase subunit 1	DPM1	34.03	9.57	204	21.9	10	5	5	0.974	0.936	1.008	1.031	1.013	1.027	5.989	1.05243	0.125792
O75914	Serine/threonine-protein kinase PAK 3	PAK3	72.7	5.33	68	8.4	5	4	2	1.08	1.055	1.071	0.941	0.9	0.942	5.989	0.86806	0.05
O95619	YEATS domain-containing protein 4	YEATS4	32.5	8.4	64	12.8	3	3	3	0.975	0.918	1	1.08	0.944	1.072	5.989	1.07017	0.268202
P78417	Glutathione S-transferase omega-1	GSTO1	33.33	6.23	287	29.5	19	8	8	1.105	1.149	1.1	0.883	0.883	0.869	5.989	0.785629	0.05
Q0IIM8	TBC1 domain family member 8B	TBC1D8B	147.98	5.66	47	2.9	2	2	3	1.042	1.176	1.067	0.838	0.989	0.877	5.989	0.823135	0.05
Q15185	Prostaglandin E synthase 3	PTGES3	21.95	4.35	68	19.4	4	3	3	1.123	1.129	1.073	0.89	0.926	0.848	5.989	0.801203	0.05
Q15629	Translocating chain-associated membrane protein 1	TRAM1	49.4	9.65	53	2.9	2	1	1	1.091	1.107	1.092	0.894	0.89	0.915	5.989	0.820365	0.05
Q16864	V-type proton ATPase subunit F	ATP6V1F	14.74	5.29	169	24.4	6	3	3	0.981	0.976	1.013	0.946	1.02	1.053	5.989	1.0165	0.66667
Q2TAL8	Glutamine-rich protein 1	QRICH1	93.94	5.59	68	4.4	3	3	3	1.124	1.006	1.025	0.927	0.902	1.005	5.989	0.898257	0.0913108
Q6PJI9	WD repeat-containing protein 59	WDR59	122.89	8.2	55	3.1	3	3	3	0.995	1.029	0.961	1.018	0.975	1.011	5.989	1.00637	0.804389
Q86X10	Ral GTPase-activating protein subunit beta	RALGAPB	184.96	6.33	42	2.3	3	3	4	1.007	0.968	0.965	1.007	1.007	1.035	5.989	1.03707	0.100074
Q8IWB1	Inositol 1,4,5-trisphosphate receptor-interacting protein	ITPRIP	68.66	5.58	44	5.3	4	3	3	1.019	0.967	1.045	1.035	0.978	0.945	5.989	0.975916	0.524525
Q8N3C0	Activating signal cointegrator 1 complex subunit 3	ASCC3	286.13	6.64	81	1.5	4	3	3	1.093	1.03	0.998	1.015	0.915	0.938	5.989	0.918936	0.110196
Q8NCW6	Polypeptide N-acetylgalactosaminyltransferase 11	GALNT11	77.98	8.47	32	2.8	2	2	2	1.043	1.009	1.091	0.9	1.026	0.92	5.989	0.905504	0.110939
Q8WUM0	Nuclear pore complex protein Nup133	NUP133	143.22	4.97	79	5.8	10	8	8	1.105	1.066	1.082	0.933	0.883	0.92	5.989	0.84107	0.05
Q96EY7	Pentatricopeptide repeat domain-containing protein 3, mitochondrial	PTCD3	89.5	6	243	9	9	5	5	1.051	1.013	0.988	1.017	0.95	0.97	5.989	0.96232	0.229343
Q9BTE1	Dynactin subunit 5	DCTN5	23.66	8.32	29	3.8	2	1	1	1.043	1.07	1.064	0.929	0.938	0.945	5.989	0.885112	0.05
Q9BU23	Lipase maturation factor 2	LMF2	84.29	10.1	89	2.7	4	2	2	1.019	1.003	1.048	0.952	0.949	1.018	5.989	0.950814	0.142787
Q9H1B7	Interferon regulatory factor 2-binding protein-like	IRF2BPL	90.91	8.56	190	6	10	5	4	1.064	1.085	1.054	0.943	0.896	0.947	5.989	0.86981	0.05
Q9UIA9	Exportin-7	XPO7	135.74	5.91	181	8.9	12	9	10	1.077	1.031	1.004	0.969	0.926	0.982	5.989	0.924486	0.05
Q9Y6W3	Calpain-7	CAPN7	106.86	7.55	70	3	3	2	2	0.962	0.982	1.043	0.94	1.019	1.043	5.989	1.00502	0.905751
O75436	Vacuolar protein sorting-associated protein 26A	VPS26A	44.91	6.13	144	25.7	13	8	7	0.991	1.005	0.982	1.008	0.967	1.036	5.989	1.01108	0.646017
P42704	Leucine-rich PPR motif-containing protein, mitochondrial	LRPPRC	182.61	5.81	1300	22.2	71	30	31	0.959	0.959	0.943	1.058	1.012	1.058	5.989	1.09332	0.05
Q14683	Structural maintenance of chromosomes protein 1A	SMC1A	179.75	7.51	602	17.4	33	22	23	1.008	1.01	1.003	0.98	0.986	1.002	5.989	0.982456	0.103737
Q6GYQ0	Ral GTPase-activating protein subunit alpha-1	RALGAPA1	257.92	5.79	125	4.5	10	10	10	1.024	1.026	1.077	0.948	0.942	0.972	5.989	0.915254	0.05
Q86U86	Protein polybromo-1	PBRM1	226.62	6.46	89	4	9	8	7	1.061	1.012	1.043	0.968	0.922	0.983	5.989	0.922015	0.05
Q9NZN5	Rho guanine nucleotide exchange factor 12	ARHGEF12	197.24	5.49	150	6.3	10	9	8	0.95	0.846	0.963	1.073	1.044	1.113	5.989	1.17071	0.05
Q9P253	Vacuolar protein sorting-associated protein 18 homolog	VPS18	119.96	5.72	150	7.6	8	6	7	0.93	0.941	0.848	1.155	1.028	1.087	5.989	1.20265	0.05
O15067	Phosphoribosylformylglycinamidine synthase	PFAS	154.09	5.5	144	6.3	9	9	10	1.119	1.075	1.025	0.932	0.9	0.937	5.988	0.860205	0.05
O75821	Eukaryotic translation initiation factor 3 subunit G	EIF3G	42.75	5.87	329	29.1	17	9	9	1.051	1.039	1.028	0.986	0.942	0.942	5.988	0.920462	0.05
O95219	Sorting nexin-4	SNX4	59.72	5.69	159	17.3	6	6	6	0.987	0.974	0.971	1.017	1.009	1.03	5.988	1.04229	0.05
O95749	Geranylgeranyl pyrophosphate synthase	GGPS1	40.75	5.78	33	6	2	2	2	1.102	1.08	1.049	0.957	0.864	0.936	5.988	0.853296	0.05
P42126	Enoyl-CoA delta isomerase 1, mitochondrial	ECI1	36.06	8.8	580	22.8	20	7	7	0.843	0.85	0.81	1.169	1.151	1.165	5.988	1.39233	0.05
P49638	Alpha-tocopherol transfer protein	TTPA	35.28	7.16	68	4.3	3	1	1	0.96	1.296	1.016	0.859	1.099	0.758	5.988	0.830073	0.270406
P56192	Methionine--tRNA ligase, cytoplasmic	MARS	113.02	5.82	235	16.4	21	13	13	1.044	0.995	1.038	1	0.964	0.947	5.988	0.946051	0.0653814
Q15773	Myeloid leukemia factor 2	MLF2	28.64	6.4	102	21.4	6	6	6	1.007	1.084	1.076	0.92	0.96	0.941	5.988	0.890748	0.05
Q53FT3	Protein Hikeshi	C11orf73	23.5	5.27	92	6.6	2	1	1	1.175	1.068	1.015	0.927	0.84	0.963	5.988	0.837937	0.05
Q96D09	G-protein coupled receptor-associated sorting protein 2	GPRASP2	104.37	4.96	43	5.3	4	4	4	0.947	0.901	0.975	1.044	1.038	1.083	5.988	1.12115	0.05
Q9H0X4	Protein ITFG3	ITFG3	63.69	5.84	27	2.4	2	2	2	1.091	1.066	1.088	0.935	0.876	0.932	5.988	0.8453	0.05
O60664	Perilipin-3	PLIN3	52.95	5.3	487	26.7	17	8	9	0.914	0.891	0.97	1.05	1.039	1.124	5.988	1.15784	0.05
O95400	CD2 antigen cytoplasmic tail-binding protein 2	CD2BP2	41.4	4.49	40	5.3	2	2	2	1.068	1.043	1.08	0.905	0.896	0.996	5.988	0.876528	0.05
P02749	Beta-2-glycoprotein 1	APOH	46.69	8.34	69	7.5	6	3	3	1.119	1.109	1.125	0.858	0.88	0.897	5.988	0.785863	0.05
P04156	Major prion protein	PRNP	30.39	9.13	66	6.7	4	2	2	1.062	1.08	0.953	1.006	0.943	0.944	5.988	0.934733	0.229243
Q86VN1	Vacuolar protein-sorting-associated protein 36	VPS36	50.95	6.75	158	13	6	5	5	1.11	1.063	1.071	0.892	0.917	0.935	5.988	0.845869	0.05
Q8IXT5	RNA-binding protein 12B	RBM12B	128	6.34	82	6.2	8	7	7	1.059	1.015	0.949	0.986	1.013	0.966	5.988	0.980814	0.620628
Q92541	RNA polymerase-associated protein RTF1 homolog	RTF1	101.12	8.21	70	2.8	2	2	2	1.118	1.033	1.041	0.932	0.945	0.919	5.988	0.87594	0.05
Q96QR8	Transcriptional activator protein Pur-beta	PURB	37.52	5.35	147	11.2	7	4	3	0.988	0.965	0.966	1.04	0.995	1.034	5.988	1.05139	0.0509903
Q99943	1-acyl-sn-glycerol-3-phosphate acyltransferase alpha	AGPAT1	34.79	9.48	55	9.9	2	2	2	1.169	1.032	1.032	0.963	0.883	0.909	5.988	0.85215	0.0534021
Q9BS26	Endoplasmic reticulum resident protein 44	ERP44	52.15	5.09	225	18.2	12	7	7	1.203	1.181	1.174	0.814	0.803	0.813	5.988	0.682968	0.05
Q99959	Plakophilin-2	PKP2	107.72	9.39	498	15.3	21	13	14	1.283	1.261	1.212	0.758	0.73	0.743	5.987	0.593983	2.26898e-05
O75410	Transforming acidic coiled-coil-containing protein 1	TACC1	104.41	4.82	116	6.8	7	6	5	1.002	0.929	0.985	0.988	1.038	1.045	5.987	1.05316	0.146304
O76024	Wolframin	WFS1	111.91	8.34	106	5.8	7	6	6	1.089	1.11	1.136	0.864	0.883	0.905	5.987	0.795202	0.05
O94906	Pre-mRNA-processing factor 6	PRPF6	124.16	8.49	156	10.8	13	12	13	1.023	1.013	1.034	0.977	0.956	0.984	5.987	0.950163	0.05
P08651	Nuclear factor 1 C-type	NFIC	62.97	8.62	66	4.7	2	2	2	1.041	1.047	1.09	0.904	0.934	0.971	5.987	0.883889	0.05
P11142	Heat shock cognate 71 kDa protein	HSPA8	83.69	5.37	4002	52.3	192	32	20	1.131	1.15	1.099	0.864	0.894	0.849	5.987	0.771302	0.05
P23588	Eukaryotic translation initiation factor 4B	EIF4B	78.33	5.55	115	9.5	7	5	6	0.923	0.959	0.945	1.057	1.05	1.053	5.987	1.11779	0.05
P30038	Delta-1-pyrroline-5-carboxylate dehydrogenase, mitochondrial	ALDH4A1	70.62	8.25	726	24	31	13	14	0.878	0.869	0.889	1.111	1.109	1.131	5.987	1.27124	0.05
P37235	Hippocalcin-like protein 1	HPCAL1	26.31	5.21	120	29	9	5	6	0.908	0.87	0.903	1.117	1.121	1.068	5.987	1.23312	0.05
Q12929	Epidermal growth factor receptor kinase substrate 8	EPS8	105	7.1	104	2.4	4	2	2	0.863	0.918	0.898	1.136	1.053	1.119	5.987	1.23479	0.05
Q13464	Rho-associated protein kinase 1	ROCK1	190.5	5.66	173	4.8	9	7	5	0.978	1.044	1.008	0.984	0.97	1.003	5.987	0.975908	0.338372
Q15165	Serum paraoxonase/arylesterase 2	PON2	43.95	5.33	88	9.6	5	3	2	1.002	1.062	1.052	1.014	0.936	0.921	5.987	0.921374	0.0869204
Q15370	Transcription elongation factor B polypeptide 2	TCEB2	15.07	4.73	157	28	10	4	4	1.114	1.067	1.043	0.939	0.904	0.92	5.987	0.85701	0.05
Q86TU7	Histone-lysine N-methyltransferase setd3	SETD3	77.64	5.72	47	6.4	3	3	3	1.117	1.128	1.088	0.865	0.918	0.871	5.987	0.79628	0.05
Q92896	Golgi apparatus protein 1	GLG1	158.28	6.52	508	16.7	27	20	21	1.145	1.103	1.099	0.884	0.898	0.858	5.987	0.788766	0.05
Q96HY7	Probable 2-oxoglutarate dehydrogenase E1 component DHKTD1, mitochondrial	DHTKD1	113.61	6.46	88	6.2	7	6	6	1.112	1.069	1.068	0.916	0.885	0.937	5.987	0.842721	0.05
Q9HC78	Zinc finger and BTB domain-containing protein 20	ZBTB20	89.28	6.03	113	9.2	7	6	6	1.057	0.967	0.992	0.983	1.024	0.964	5.987	0.98508	0.668504
Q9UBQ5	Eukaryotic translation initiation factor 3 subunit K	EIF3K	28.31	4.81	50	14.7	4	3	3	1.059	1.112	1.078	0.911	0.91	0.917	5.987	0.842721	0.05
Q9Y2H1	Serine/threonine-protein kinase 38-like	STK38L	63.13	6.36	71	9.1	4	4	4	0.965	0.986	1.011	1.036	0.949	1.04	5.987	1.02127	0.56801
Q9Y6X8	Zinc fingers and homeoboxes protein 2	ZHX2	108.29	6.42	49	2.3	2	2	2	1.062	1.091	1.055	0.926	0.936	0.917	5.987	0.866272	0.05
O15020	Spectrin beta chain, non-erythrocytic 2	SPTBN2	300.25	5.79	878	18.1	53	38	33	0.985	1.017	1.01	0.985	0.985	1.005	5.987	0.987716	0.361241
P12956	X-ray repair cross-complementing protein 6	XRCC6	83.83	6.23	794	31.7	42	16	19	1.059	1.009	1.022	0.973	0.965	0.959	5.987	0.93754	0.05
P25398	40S ribosomal protein S12	RPS12	18.8	6.81	459	53.8	27	7	7	1.058	1.221	1.073	0.846	0.946	0.843	5.987	0.786098	0.05
P35052	Glypican-1	GPC1	67.54	7.07	50	3	2	2	2	1.033	1.078	1.053	0.912	0.943	0.968	5.987	0.892225	0.05
Q16134	Electron transfer flavoprotein-ubiquinone oxidoreductase, mitochondrial	ETFDH	78.42	7.31	461	20.7	23	13	14	0.809	0.777	0.785	1.216	1.174	1.226	5.987	1.52509	0.05
Q99623	Prohibitin-2	PHB2	37.86	9.83	893	53.8	53	17	16	0.834	0.842	0.856	1.158	1.154	1.143	5.987	1.36453	0.05
Q9HC52	Chromobox protein homolog 8	CBX8	50.13	9.92	39	4.6	2	2	2	1.135	1.109	1.103	0.874	0.888	0.878	5.987	0.788766	0.05
Q9Y2W6	Tudor and KH domain-containing protein	TDRKH	69.74	4.91	83	8.9	4	4	4	1.058	1.01	1.107	0.903	0.957	0.952	5.987	0.885669	0.05
Q9Y6A9	Signal peptidase complex subunit 1	SPCS1	13.92	9.33	158	11.8	5	1	1	1.166	1.144	1.181	0.829	0.832	0.835	5.987	0.714981	0.05
Q8WXI9	Transcriptional repressor p66-beta	GATAD2B	74.04	9.73	108	3.2	3	2	2	1.023	0.922	1.123	0.959	1.02	0.94	5.987	0.951434	0.493442
O00273	DNA fragmentation factor subunit alpha	DFFA	41.48	4.68	82	12.1	2	2	3	1.076	1.149	1.1	0.912	0.823	0.926	5.986	0.800301	0.05
Q12874	Splicing factor 3A subunit 3	SF3A3	68.78	5.27	203	11.4	11	4	5	1.035	1.012	1.035	0.988	0.964	0.952	5.986	0.942245	0.05
Q96EE3	Nucleoporin SEH1	SEH1L	44.95	8.33	275	21.4	14	7	7	1.064	1.091	1.052	0.93	0.896	0.953	5.986	0.866542	0.05
Q9BZQ6	ER degradation-enhancing alpha-mannosidase-like protein 3	EDEM3	116.45	4.82	77	2.8	3	2	2	1.124	1.082	1.181	0.892	0.813	0.894	5.986	0.767346	0.05
Q9NUU7	ATP-dependent RNA helicase DDX19A	DDX19A	63.33	6.19	244	13.8	12	6	1	1.094	1.021	1.076	0.969	0.87	0.956	5.986	0.875901	0.05
Q14515	SPARC-like protein 1	SPARCL1	86.79	4.71	144	9.2	8	4	4	0.452	0.385	0.475	1.605	1.555	1.514	5.986	3.5625	7.62487e-06
O75533	Splicing factor 3B subunit 1	SF3B1	165.96	6.65	503	19.4	32	22	21	0.978	0.972	0.987	1.016	1.036	0.997	5.986	1.03813	0.0652036
P19525	Interferon-induced, double-stranded RNA-activated protein kinase	EIF2AK2	76.26	8.58	59	4.7	4	3	3	1.098	1.075	1.055	0.924	0.909	0.925	5.986	0.854399	0.05
P29992	Guanine nucleotide-binding protein subunit alpha-11	GNA11	48.11	5.51	105	14.5	8	8	6	1.037	1.038	1.042	0.961	0.954	0.954	5.986	0.920436	0.05
P49840	Glycogen synthase kinase-3 alpha	GSK3A	56.68	8.95	74	9.7	5	5	2	1.052	1.069	1.112	0.927	0.856	0.97	5.986	0.851531	0.05
P51580	Thiopurine S-methyltransferase	TPMT	33.66	5.84	35	10.2	1	1	2	1.143	1.174	1.03	0.904	0.842	0.893	5.986	0.788467	0.05
Q06323	Proteasome activator complex subunit 1	PSME1	35.98	5.78	192	26.5	11	6	6	1.115	1.066	1.017	0.939	0.921	0.928	5.986	0.871795	0.05
Q07866	Kinesin light chain 1	KLC1	78.61	5.87	381	29.5	26	15	13	1.057	1.061	1.076	0.948	0.91	0.934	5.986	0.874139	0.05
Q15369	Transcription elongation factor B polypeptide 1	TCEB1	14.24	4.74	63	21.4	2	2	2	1.036	1.155	1.136	0.962	0.814	0.883	5.986	0.799219	0.05
Q6FI81	Anamorsin	CIAPIN1	40.78	5.44	58	10.3	2	2	3	1.139	1.037	1.076	0.916	0.922	0.896	5.986	0.840713	0.05
Q96B26	Exosome complex component RRP43	EXOSC8	35.4	5.17	55	4.7	2	1	1	1.156	0.968	0.984	0.914	0.998	0.966	5.986	0.925997	0.333164
Q96KA5	Cleft lip and palate transmembrane protein 1-like protein	CLPTM1L	70.55	8.71	35	5.8	3	3	3	1.034	1.153	1.034	0.928	0.888	0.949	5.986	0.858429	0.05
Q96KG9	N-terminal kinase-like protein	SCYL1	101.43	5.94	125	3.2	3	2	2	1.209	1.094	1.095	0.927	0.807	0.854	5.986	0.761624	0.05
Q99615	DnaJ homolog subfamily C member 7	DNAJC7	69.12	6.56	180	11.3	7	6	6	1.189	1.171	1.165	0.815	0.803	0.843	5.986	0.698156	0.05
Q9BPU6	Dihydropyrimidinase-related protein 5	DPYSL5	69.52	6.73	108	12.8	19	7	7	1.015	1.018	1.031	0.976	0.949	0.997	5.986	0.953655	0.0631705
Q9H479	Fructosamine-3-kinase	FN3K	38.81	7.13	200	19.1	9	5	5	1.084	1.019	1.061	0.937	0.926	0.959	5.986	0.891909	0.05
Q9NRY4	Rho GTPase-activating protein 35	ARHGAP35	196.7	6.2	69	2.6	4	4	4	1.138	1.022	1.074	0.927	0.916	0.909	5.986	0.850959	0.05
P61018	Ras-related protein Rab-4B	RAB4B	26.38	5.8	217	26.8	12	5	2	0.978	0.999	1.046	1	0.967	0.996	5.986	0.980152	0.441968
Q9NZN8	CCR4-NOT transcription complex subunit 2	CNOT2	64.91	7.23	82	8.9	4	4	5	1.1	1.092	1.071	0.954	0.834	0.935	5.986	0.834508	0.05
P25786	Proteasome subunit alpha type-1	PSMA1	32.8	6.15	495	42.6	30	12	12	1.075	1.12	1.101	0.88	0.916	0.893	5.985	0.815837	0.05
P62753	40S ribosomal protein S6	RPS6	37.31	10.85	131	19.7	10	4	5	1.093	1.086	1.053	0.952	0.953	0.848	5.985	0.851795	0.05
P62834	Ras-related protein Rap-1A	RAP1A	25.44	6.38	359	33.2	16	5	1	1.005	1.008	1.332	0.797	0.935	0.908	5.985	0.789238	0.151107
Q12955	Ankyrin-3	ANK3	566.73	6.07	446	4.4	23	18	15	0.914	0.94	0.936	1.048	1.068	1.079	5.985	1.14516	0.05
Q15366	Poly(rC)-binding protein 2	PCBP2	43.08	6.33	807	40.5	31	9	5	1.05	1.175	1.028	0.893	0.982	0.857	5.985	0.83984	0.05
Q5VW36	Focadhesin	FOCAD	223.19	6.17	54	1.2	4	3	2	1.066	1.045	1.062	0.94	0.919	0.953	5.985	0.886228	0.05
Q9P0M6	Core histone macro-H2A.2	H2AFY2	51.03	9.71	456	25.8	19	7	7	0.952	0.932	0.924	1.064	1.078	1.035	5.985	1.13141	0.05
Q9UNH7	Sorting nexin-6	SNX6	56.3	5.81	296	15.8	12	6	5	1.068	1.052	1.069	0.934	0.928	0.934	5.985	0.876764	0.05
Q9Y4G8	Rap guanine nucleotide exchange factor 2	RAPGEF2	190.17	6.21	95	3.3	5	5	5	0.908	0.973	0.945	0.999	1.091	1.069	5.985	1.11783	0.05
O14576	Cytoplasmic dynein 1 intermediate chain 1	DYNC1I1	81.67	5	304	13.8	13	8	8	1.084	1.057	1.068	0.941	0.895	0.94	5.985	0.865067	0.05
O94901	SUN domain-containing protein 1	SUN1	98.6	6.61	264	15.5	13	9	11	1.015	0.995	0.991	1.003	0.99	0.991	5.985	0.994335	0.551356
P00540	Proto-oncogene serine/threonine-protein kinase mos	MOS	41.8	9.15	27	1.7	2	1	1	1.117	1.037	1.019	1.015	0.934	0.863	5.985	0.886228	0.0953568
P02751	Fibronectin	FN1	284.16	5.46	2512	19	121	41	42	1.095	1.087	1.086	0.898	0.886	0.933	5.985	0.831395	0.05
P04275	von Willebrand factor	VWF	347.38	5.29	617	7.4	28	18	18	0.939	0.915	0.955	1.045	1.057	1.074	5.985	1.13065	0.05
P35219	Carbonic anhydrase-related protein	CA8	35.99	4.78	80	4.1	2	1	1	0.981	1.056	1.215	0.951	0.858	0.924	5.985	0.840406	0.114777
P35542	Serum amyloid A-4 protein	SAA4	16.68	9.17	87	14.6	5	2	2	1.189	1.174	1.117	0.855	0.787	0.863	5.985	0.719828	0.05
P38646	Stress-70 protein, mitochondrial	HSPA9	86.07	5.87	2858	46.1	146	32	32	1.044	1.043	1.069	0.933	0.942	0.954	5.985	0.896388	0.05
P51784	Ubiquitin carboxyl-terminal hydrolase 11	USP11	121.49	5.28	168	7.4	7	5	7	1.068	1.102	1.064	0.907	0.863	0.981	5.985	0.850649	0.05
Q13813	Spectrin alpha chain, non-erythrocytic 1	SPTAN1	330.77	5.22	4491	42.6	215	97	100	0.915	0.907	0.908	1.09	1.081	1.084	5.985	1.19231	0.05
Q5VIR6	Vacuolar protein sorting-associated protein 53 homolog	VPS53	92.78	5.74	129	5.9	6	5	5	1.055	1.072	1.061	0.943	0.915	0.939	5.985	0.877353	0.05
Q68DH5	LMBR1 domain-containing protein 2	LMBRD2	89.65	7.25	146	6.3	8	5	5	1.22	1.204	1.179	0.805	0.769	0.808	5.985	0.661116	0.05
Q6PD62	RNA polymerase-associated protein CTR9 homolog	CTR9	159.31	6.32	108	3.8	3	3	4	0.94	1.041	1.021	1.028	0.975	0.98	5.985	0.993671	0.86833
Q8TD19	Serine/threonine-protein kinase Nek9	NEK9	121.7	5.51	87	6.5	6	6	6	1.022	1.052	1.113	0.91	0.94	0.948	5.985	0.877942	0.05
Q9NZN4	EH domain-containing protein 2	EHD2	70.23	6.03	227	15.7	13	8	7	1.006	1.004	1.048	0.974	0.952	1.001	5.985	0.957162	0.0962872
Q9UKV3	Apoptotic chromatin condensation inducer in the nucleus	ACIN1	174.4	6.08	366	11	16	12	13	0.953	0.958	0.927	1.066	1.034	1.047	5.985	1.10888	0.05
Q9Y232	Chromodomain Y-like protein	CDYL	78.41	9.5	42	1.8	3	2	2	1.116	1.145	1.103	0.877	0.866	0.878	5.985	0.779132	0.05
Q9Y265	RuvB-like 1	RUVBL1	60.16	6.02	557	34	23	12	13	0.974	0.934	1.009	1.045	0.989	1.034	5.985	1.05177	0.146294
P82979	SAP domain-containing ribonucleoprotein	SARNP	29.9	6.1	40	8.6	2	2	2	1.109	0.995	1.123	0.953	0.876	0.928	5.984	0.854354	0.05
Q15771	Ras-related protein Rab-30	RAB30	25.91	4.91	151	13.3	9	3	2	1.076	0.988	1.067	0.945	0.963	0.945	5.984	0.91121	0.0742192
Q9HB40	Retinoid-inducible serine carboxypeptidase	SCPEP1	58.19	5.61	64	6.6	4	3	4	1.024	1.035	1.022	0.932	0.993	0.978	5.984	0.942227	0.0775245
Q9BZE9	Tether containing UBX domain for GLUT4	ASPSCR1	66.62	6.23	48	3.4	2	2	2	1.263	1.246	1.268	0.735	0.726	0.746	5.984	0.584326	4.82978e-07
O00410	Importin-5	IPO5	138.78	4.83	282	11.7	14	8	9	1.083	1.01	1.035	0.966	0.926	0.964	5.984	0.913043	0.05
O14979	Heterogeneous nuclear ribonucleoprotein D-like	HNRNPDL	53.23	9.59	188	15.2	10	7	6	1.045	1.059	0.986	0.971	0.939	0.984	5.984	0.93657	0.0802827
O15078	Centrosomal protein of 290 kDa	CEP290	361.7	5.75	50	1.3	8	5	3	1.076	0.97	0.993	1.02	0.941	0.984	5.984	0.969069	0.476218
O60502	Protein O-GlcNAcase	MGEA5	117.91	4.82	148	2.9	6	3	3	1.104	1.106	1.094	0.914	0.878	0.888	5.984	0.811138	0.05
O95163	Elongator complex protein 1	IKBKAP	170.15	5.61	71	3.3	4	3	5	0.988	0.943	0.937	1.082	1.022	1.012	5.984	1.08647	0.05
O95747	Serine/threonine-protein kinase OSR1	OXSR1	68.12	6.03	394	15.7	15	7	6	1.002	0.966	0.976	1.008	1.015	1.017	5.984	1.03261	0.0883703
P01034	Cystatin-C	CST3	17.85	9	805	28.8	26	4	4	1.004	0.969	0.959	1.019	1.001	1.032	5.984	1.04093	0.0804555
P09871	Complement C1s subcomponent	C1S	86.88	4.86	132	6.5	6	4	4	1.214	1.157	1.133	0.844	0.776	0.86	5.984	0.707763	0.05
P24928	DNA-directed RNA polymerase II subunit RPB1	POLR2A	242.7	7.02	303	10.5	23	19	19	1.073	1.021	1.048	0.956	0.936	0.95	5.984	0.904519	0.05
P30085	UMP-CMP kinase	CMPK1	27.25	5.44	280	29.6	12	6	6	1.165	1.201	1.123	0.862	0.818	0.815	5.984	0.715105	0.05
P34913	Bifunctional epoxide hydrolase 2	EPHX2	71.34	5.91	51	6.1	3	3	3	1.149	1.144	1.117	0.856	0.898	0.82	5.984	0.754839	0.05
P51687	Sulfite oxidase, mitochondrial	SUOX	64.65	5.72	205	16.9	11	9	9	0.941	0.936	0.944	1.081	1.031	1.051	5.984	1.12123	0.05
P53621	Coatomer subunit alpha	COPA	159.05	7.7	979	23.5	52	23	26	1.162	1.146	1.104	0.864	0.876	0.832	5.984	0.75381	0.05
P55081	Microfibrillar-associated protein 1	MFAP1	62.24	4.95	126	15	9	6	5	1	0.963	0.965	1.007	1.048	1.001	5.984	1.04372	0.0912931
P61247	40S ribosomal protein S3a	RPS3A	39.09	9.75	326	35.2	24	10	11	1.019	1.097	1.052	0.91	1.006	0.9	5.984	0.888889	0.0526703
Q8IZ83	Aldehyde dehydrogenase family 16 member A1	ALDH16A1	89.31	6.35	189	10.2	8	7	7	1.052	1.08	1.063	0.927	0.924	0.938	5.984	0.872926	0.05
Q9H1V8	Sodium-dependent neutral amino acid transporter SLC6A17	SLC6A17	89.08	5.68	30	3.9	3	3	3	1.103	1.045	0.983	0.972	0.947	0.934	5.984	0.91121	0.104683
Q9NUQ2	1-acyl-sn-glycerol-3-phosphate acyltransferase epsilon	AGPAT5	48.57	9.18	31	3.6	3	2	2	1.127	1.073	1.084	0.901	0.901	0.898	5.984	0.822168	0.05
Q9NXE4	Sphingomyelin phosphodiesterase 4	SMPD4	101.83	8.11	97	7.5	8	6	7	1.008	1.055	1.101	0.944	0.9	0.976	5.984	0.891277	0.05
Q9Y4W2	Ribosomal biogenesis protein LAS1L	LAS1L	93.15	4.64	170	7.6	5	4	4	0.929	0.972	1.101	1.002	1.056	0.924	5.984	0.993338	0.922852
O14523	C2 domain-containing protein 2-like	C2CD2L	83.01	7.62	90	6.7	5	4	5	1.026	1.037	0.995	0.978	0.949	0.999	5.984	0.956835	0.0849048
P09455	Retinol-binding protein 1	RBP1	18.99	4.99	315	49.6	16	7	7	1.076	1.022	1.033	0.967	0.948	0.938	5.984	0.91121	0.05
P30613	Pyruvate kinase PKLR	PKLR	67	7.64	248	11.1	13	5	6	1.02	1.053	1.03	0.927	0.933	1.021	5.984	0.928456	0.124558
Q15019	Septin-2	SEPT2	47.88	6.15	300	41.8	19	12	12	1.086	1.073	1.033	0.927	0.94	0.925	5.984	0.874687	0.05
Q9NY33	Dipeptidyl peptidase 3	DPP3	90.67	5.02	92	11.8	10	10	10	1.087	1.031	1.045	0.934	0.944	0.943	5.984	0.891875	0.05
P0DMV8	Heat shock 70 kDa protein 1A	HSPA1A	81.98	5.48	1593	31.5	76	18	7	1.267	1.249	1.199	0.804	0.716	0.748	5.983	0.610498	0.000124281
O95881	Thioredoxin domain-containing protein 12	TXNDC12	22.57	5.24	39	12.8	3	3	3	1.233	1.164	1.097	0.852	0.822	0.815	5.983	0.712364	0.05
P01861	Ig gamma-4 chain C region	IGHG4	42.16	7.18	415	14.7	25	4	3	1.061	1.02	1.092	1.025	0.891	0.894	5.983	0.885597	0.0939978
P04075	Fructose-bisphosphate aldolase A	ALDOA	46.04	8.3	1635	39	71	14	12	1.144	1.121	1.11	0.873	0.86	0.875	5.983	0.772741	0.05
P34059	N-acetylgalactosamine-6-sulfatase	GALNS	62.57	6.25	39	4.2	2	2	2	1.041	1.027	1.057	0.923	0.966	0.969	5.983	0.91456	0.05
Q01968	Inositol polyphosphate 5-phosphatase OCRL-1	OCRL	118.91	6.13	386	13	20	11	11	0.919	0.931	0.953	1.059	1.048	1.073	5.983	1.1345	0.05
Q12769	Nuclear pore complex protein Nup160	NUP160	176.27	5.31	79	3.1	4	4	5	1.099	1.077	1.056	0.897	0.908	0.946	5.983	0.851176	0.05
Q15286	Ras-related protein Rab-35	RAB35	27.65	8.52	377	24.9	20	6	5	1.031	1.089	0.984	0.927	0.992	0.96	5.983	0.927513	0.117335
Q5SRE5	Nucleoporin NUP188 homolog	NUP188	216.01	6.27	65	2.1	5	4	4	1.065	1.062	1.064	0.924	0.928	0.94	5.983	0.874961	0.05
Q7LBC6	Lysine-specific demethylase 3B	KDM3B	220.21	6.78	88	2.8	4	4	4	1.089	1.024	1.194	0.858	0.899	0.919	5.983	0.809193	0.05
Q8NC96	Adaptin ear-binding coat-associated protein 1	NECAP1	33.96	6.33	38	10.5	3	3	3	1.067	1.069	1.034	0.974	0.892	0.947	5.983	0.887382	0.05
Q92552	28S ribosomal protein S27, mitochondrial	MRPS27	55.26	5.83	144	11.6	4	4	4	1.056	0.965	0.994	0.988	0.979	1.001	5.983	0.984411	0.622206
Q9BXI6	TBC1 domain family member 10A	TBC1D10A	65.84	8.69	52	3.9	2	2	2	1.092	1.079	1.002	0.881	0.913	1.016	5.983	0.885597	0.0787913
Q9Y3I1	F-box only protein 7	FBXO7	63.28	6.11	71	6.7	4	3	4	0.977	0.947	0.962	1.026	1.081	0.99	5.983	1.07311	0.10564
O14602	Eukaryotic translation initiation factor 1A, Y-chromosomal	EIF1AY	20.44	5.07	137	26.4	8	4	4	1.175	1.152	1.157	0.84	0.818	0.841	5.983	0.717279	0.05
O14641	Segment polarity protein dishevelled homolog DVL-2	DVL2	83.54	5.67	55	4.2	3	3	3	1.066	1.157	1.148	0.864	0.934	0.814	5.983	0.774844	0.05
P34897	Serine hydroxymethyltransferase, mitochondrial	SHMT2	61.69	8.76	505	28	30	14	13	0.989	0.977	0.983	1.009	0.996	1.029	5.983	1.02882	0.08452
Q8WTW3	Conserved oligomeric Golgi complex subunit 1	COG1	123.63	6.96	100	8.5	7	7	7	1.108	1.121	1.076	0.925	0.847	0.906	5.983	0.810287	0.05
Q9BXS5	AP-1 complex subunit mu-1	AP1M1	56.29	6.82	46	11.6	3	3	3	1.03	1.041	1.15	0.94	0.884	0.938	5.983	0.857498	0.05
Q9H074	Polyadenylate-binding protein-interacting protein 1	PAIP1	58.53	4.71	58	3.1	3	2	2	0.994	0.998	0.988	1.012	0.97	1.021	5.983	1.00772	0.676096
Q9H4A3	Serine/threonine-protein kinase WNK1	WNK1	276.99	5.94	242	4.1	11	9	7	0.988	0.992	1.043	0.963	0.981	1.016	5.983	0.97916	0.424076
Q9Y285	Phenylalanine--tRNA ligase alpha subunit	FARSA	64.23	7.31	288	20.1	16	9	9	1.007	1.006	1.02	0.979	0.957	1.014	5.983	0.972634	0.232987
Q9Y490	Talin-1	TLN1	309.12	5.77	4456	32	204	72	66	0.89	0.877	0.886	1.121	1.089	1.12	5.983	1.25518	0.05
P09936	Ubiquitin carboxyl-terminal hydrolase isozyme L1	UCHL1	29.05	5.33	437	35.9	26	7	8	1.14	1.143	1.128	0.863	0.848	0.861	5.983	0.754031	0.05
Q9UHB6	LIM domain and actin-binding protein 1	LIMA1	102.82	6.41	181	14.9	11	10	10	0.771	0.711	0.766	1.24	1.208	1.286	5.982	1.66103	7.56925e-05
O95298	NADH dehydrogenase [ubiquinone] 1 subunit C2	NDUFC2	15.84	9.04	89	21.8	6	4	4	0.937	1.02	0.996	0.995	0.966	1.068	5.982	1.02574	0.553752
P13010	X-ray repair cross-complementing protein 5	XRCC5	97.89	5.55	401	17.3	26	14	14	1.118	1.085	1.075	0.935	0.868	0.901	5.982	0.824893	0.05
P51452	Dual specificity protein phosphatase 3	DUSP3	23.21	7.66	90	11.9	3	2	2	1.089	1.05	1.056	0.929	0.919	0.939	5.982	0.8723	0.05
O95741	Copine-6	CPNE6	68.82	5.32	79	11.5	7	7	7	1.154	1.125	1.08	0.893	0.924	0.806	5.982	0.780887	0.05
P16885	1-phosphatidylinositol 4,5-bisphosphate phosphodiesterase gamma-2	PLCG2	170.74	6.21	51	1.9	3	3	3	0.916	0.885	0.912	1.115	1.101	1.053	5.982	1.20494	0.05
P30626	Sorcin	SRI	23.55	5.32	276	20.2	17	4	4	0.96	0.975	0.925	1.02	1.023	1.079	5.982	1.09161	0.05
P38606	V-type proton ATPase catalytic subunit A	ATP6V1A	76.91	5.35	638	20.1	32	12	12	1.003	1.014	1.024	0.986	0.96	0.995	5.982	0.967116	0.0657611
P38919	Eukaryotic initiation factor 4A-III	EIF4A3	52.63	6.3	563	30.4	37	16	14	1.103	1.073	1.078	0.914	0.902	0.912	5.982	0.838353	0.05
Q00266	S-adenosylmethionine synthase isoform type-1	MAT1A	49.46	5.86	185	24.3	13	7	5	1.111	1.094	1.16	0.832	0.912	0.873	5.982	0.777712	0.05
Q00403	Transcription initiation factor IIB	GTF2B	39.91	8.67	37	8.9	3	3	3	1.086	0.996	1.028	1.001	0.963	0.908	5.982	0.923473	0.103299
Q6P3X3	Tetratricopeptide repeat protein 27	TTC27	109.34	5.42	31	2.3	4	2	2	1.074	1.162	1.023	0.916	0.953	0.854	5.982	0.835532	0.05
Q7Z4W1	L-xylulose reductase	DCXR	28.24	8.33	127	9	8	3	3	1.077	1.127	1.076	0.916	0.886	0.9	5.982	0.82378	0.05
Q8N3X1	Formin-binding protein 4	FNBP4	124.86	4.68	55	2.9	3	3	3	1.092	1.024	1.044	0.947	0.921	0.954	5.982	0.893038	0.05
Q96G03	Phosphoglucomutase-2	PGM2	79.98	6.28	95	10.8	7	5	6	1.159	1.151	1.098	0.857	0.853	0.864	5.982	0.755282	0.05
Q9H9A5	CCR4-NOT transcription complex subunit 10	CNOT10	96.46	7.95	62	2.8	2	2	2	1.082	1.046	1.065	0.93	0.888	0.971	5.982	0.873473	0.05
Q9NTJ5	Phosphatidylinositide phosphatase SAC1	SACM1L	75	6.66	256	16.9	15	10	11	0.919	0.92	0.952	1.074	1.039	1.078	5.982	1.14332	0.05
Q9UNX3	60S ribosomal protein L26-like 1	RPL26L1	22.98	10.55	27	13.8	2	2	3	1.028	1.092	1.073	0.941	0.95	0.898	5.982	0.873473	0.05
A5PLN9	Trafficking protein particle complex subunit 13	TRAPPC13	53.14	5.4	28	2.2	2	1	1	1.138	1.04	0.993	0.98	0.901	0.93	5.982	0.886471	0.0878264
O94805	Actin-like protein 6B	ACTL6B	53.26	5.48	74	6.1	5	3	2	1.006	0.998	1.016	0.998	0.963	1.001	5.982	0.980795	0.250335
P52434	DNA-directed RNA polymerases I, II, and III subunit RPABC3	POLR2H	19.25	4.5	90	18	2	2	2	1.014	1.098	1.066	0.902	0.938	0.964	5.982	0.882316	0.05
Q86W42	THO complex subunit 6 homolog	THOC6	41.52	7.12	97	8.2	2	2	2	1.004	1.055	1.08	0.912	0.959	0.972	5.982	0.905702	0.05
Q9NTJ4	Alpha-mannosidase 2C1	MAN2C1	123.83	6.1	80	3	4	3	3	0.985	0.955	0.98	1.037	0.973	1.052	5.982	1.04863	0.180528
Q9Y399	28S ribosomal protein S2, mitochondrial	MRPS2	36.03	9.37	48	7.1	4	3	3	1.003	0.979	1.008	0.996	0.951	1.045	5.982	1.00067	0.983169
O43795	Unconventional myosin-Ib	MYO1B	157.91	9.43	233	10.3	13	11	11	0.845	0.899	0.903	1.086	1.08	1.168	5.981	1.25954	0.05
P01614	Ig kappa chain V-II region Cum	P01614	13.7	5.28	76	11.3	2	1	1	1.122	1.106	1.047	1.009	0.827	0.87	5.981	0.82626	0.0583973
P46782	40S ribosomal protein S5	RPS5	26.93	9.73	182	24	6	5	5	1.031	1.137	1.092	0.867	0.922	0.932	5.981	0.834663	0.05
P61619	Protein transport protein Sec61 subunit alpha isoform 1	SEC61A1	57.27	8.3	272	10.3	14	5	5	1.179	1.077	1.108	0.92	0.875	0.822	5.981	0.777943	0.05
Q8TB37	Iron-sulfur protein NUBPL	NUBPL	38.19	9.17	175	15.4	7	4	4	0.877	0.908	0.919	1.095	1.084	1.098	5.981	1.21191	0.05
O95671	N-acetylserotonin O-methyltransferase-like protein	ASMTL	77.8	5.71	92	8.1	7	6	6	1	0.966	0.951	1.046	0.993	1.025	5.981	1.05039	0.0817228
P35232	Prohibitin	PHB	32.82	5.57	1568	57.4	63	14	14	0.836	0.841	0.807	1.185	1.152	1.16	5.981	1.40781	0.05
P41250	Glycine--tRNA ligase	GARS	96	6.61	374	13.3	16	10	10	1.07	1.162	1.099	0.848	0.907	0.895	5.981	0.795557	0.05
Q03154	Aminoacylase-1	ACY1	49.75	5.77	54	7.4	3	3	3	1.038	1.025	1.022	0.962	0.922	1.012	5.981	0.938736	0.132146
Q14315	Filamin-C	FLNC	329.84	5.65	522	6.5	27	14	7	0.924	0.954	0.973	1.01	1.063	1.057	5.981	1.09786	0.05
Q14789	Golgin subfamily B member 1	GOLGB1	449.4	4.96	1090	19.1	63	53	55	1.01	0.992	1.024	0.995	0.962	0.998	5.981	0.976537	0.188125
Q16798	NADP-dependent malic enzyme, mitochondrial	ME3	75.44	8.16	440	16.4	23	10	9	0.767	1.156	1.18	0.795	1.029	1.054	5.981	0.92749	0.662936
Q5VWQ0	Round spermatid basic protein 1	RSBN1	102.61	8.85	32	2.4	2	2	2	1.06	1.041	1.038	0.958	0.93	0.954	5.981	0.905384	0.05
Q6ZMI0	Protein phosphatase 1 regulatory subunit 21	PPP1R21	105.04	6.4	128	10.1	7	7	8	1.057	1.014	1.008	0.943	0.955	1.004	5.981	0.942514	0.0736907
Q7Z2W4	Zinc finger CCCH-type antiviral protein 1	ZC3HAV1	116.2	8.72	185	9.1	7	6	6	0.934	0.964	0.982	1.052	1.014	1.035	5.981	1.07674	0.05
Q8IYB4	PEX5-related protein	PEX5L	79.28	5.18	37	3.4	2	2	2	0.987	1.037	1.046	0.923	1.048	0.94	5.981	0.948208	0.312109
Q92890	Ubiquitin fusion degradation protein 1 homolog	UFD1L	40.03	6.27	149	22.1	8	6	6	1.219	1.068	1.094	0.865	0.888	0.847	5.981	0.769003	0.05
Q96GM5	SWI/SNF-related matrix-associated actin-dependent regulator of chromatin subfamily D member 1	SMARCD1	66.04	9.31	94	7.2	3	3	3	0.981	0.945	1.024	1	1.023	1.008	5.981	1.02746	0.359311
Q96QK1	Vacuolar protein sorting-associated protein 35	VPS35	103.22	5.32	550	20.4	26	13	13	1.023	1.006	1.01	0.979	1.004	0.959	5.981	0.968082	0.117135
Q9NX24	H/ACA ribonucleoprotein complex subunit 2	NHP2	21.2	8.48	51	6.5	3	1	1	1.191	1.04	0.989	0.933	0.87	0.958	5.981	0.857453	0.112437
Q9UI09	NADH dehydrogenase [ubiquinone] 1 alpha subcomplex subunit 12	NDUFA12	20.08	9.63	42	17.9	2	2	2	1.082	1.003	1.065	0.981	0.909	0.941	5.981	0.89873	0.05
Q9UQN3	Charged multivesicular body protein 2b	CHMP2B	30.36	8.8	84	15.5	4	3	4	1.064	1.027	1.008	1.013	0.926	0.943	5.981	0.929977	0.095117
Q9Y2Q3	Glutathione S-transferase kappa 1	GSTK1	28.8	8.5	664	27	22	5	5	0.784	0.817	0.804	1.196	1.16	1.22	5.981	1.4869	0.05
Q9Y5K8	V-type proton ATPase subunit D	ATP6V1D	34.66	9.36	140	17.8	7	4	5	0.913	0.975	0.932	1.065	1.027	1.069	5.981	1.12092	0.05
O75832	26S proteasome non-ATPase regulatory subunit 10	PSMD10	28.59	5.71	67	9.7	3	2	2	0.992	0.988	1.07	0.976	1.004	0.951	5.981	0.960984	0.28294
O94856	Neurofascin	NFASC	165	6.24	146	8.9	11	9	12	1.05	1.036	1.094	0.937	0.933	0.93	5.98	0.880503	0.05
P15586	N-acetylglucosamine-6-sulfatase	GNS	69.26	8.6	102	6.2	4	1	3	1.094	1.116	1.044	0.967	0.957	0.802	5.98	0.837738	0.0655238
P29279	Connective tissue growth factor	CTGF	46.02	8.43	26	6.3	2	2	2	1.087	1.064	1.122	0.998	0.852	0.857	5.98	0.82707	0.05
P63010	AP-2 complex subunit beta	AP2B1	119.61	5.22	943	26.1	47	22	11	1.067	1.026	1.03	0.95	0.955	0.952	5.98	0.914825	0.05
P82663	28S ribosomal protein S25, mitochondrial	MRPS25	24.46	8.99	64	16.2	2	2	2	1.096	1.026	1.024	0.937	0.907	0.99	5.98	0.900826	0.05
Q13049	E3 ubiquitin-protein ligase TRIM32	TRIM32	80.87	6.59	32	1.7	2	1	1	1.095	0.982	0.984	0.944	0.995	0.98	5.98	0.95361	0.335072
Q13277	Syntaxin-3	STX3	39.78	5.31	65	14.2	6	4	4	0.962	0.997	0.903	1.049	1.024	1.045	5.98	1.08945	0.0800643
Q14195	Dihydropyrimidinase-related protein 3	DPYSL3	70.34	6.04	662	19.8	24	9	8	1.018	1.007	1.013	0.965	0.979	0.998	5.98	0.9684	0.0667015
Q53GS7	Nucleoporin GLE1	GLE1	92.5	7.06	41	3.7	3	3	3	1.09	1.067	1.067	0.924	0.896	0.936	5.98	0.854839	0.05
Q5VSG8	Glycoprotein endo-alpha-1,2-mannosidase-like protein	MANEAL	55.06	6.47	146	6.6	6	2	2	1.002	1.105	1.053	0.913	0.934	0.973	5.98	0.892405	0.05
Q86SK9	Stearoyl-CoA desaturase 5	SCD5	41.48	9.65	72	5.5	3	1	1	1.017	1.016	0.879	1.038	0.957	1.073	5.98	1.05357	0.419063
Q86Y56	Dynein assembly factor 5, axonemal	DNAAF5	100.5	5.98	29	2.2	2	1	2	1.024	1.009	1.048	0.949	0.962	0.988	5.98	0.940928	0.05
Q8IV08	Phospholipase D3	PLD3	59.02	6.02	403	17.3	24	9	8	1.064	1.05	1.04	0.957	0.927	0.942	5.98	0.896005	0.05
Q8TD22	Sideroflexin-5	SFXN5	40.25	9.4	127	6.2	7	2	2	0.831	0.868	0.887	1.12	1.14	1.134	5.98	1.31245	0.05
Q969E2	Secretory carrier-associated membrane protein 4	SCAMP4	27.89	9.07	72	12.2	4	3	3	1.061	1.109	1.099	0.885	0.918	0.908	5.98	0.829306	0.05
Q99538	Legumain	LGMN	55.51	6.07	28	4.2	2	2	2	0.996	1.085	1.108	0.909	0.953	0.929	5.98	0.875196	0.05
Q9H2K8	Serine/threonine-protein kinase TAO3	TAOK3	124.82	6.83	152	8.4	9	7	5	0.86	0.831	0.94	1.159	1.097	1.093	5.98	1.2729	0.05
Q9H7Z6	Histone acetyltransferase KAT8	KAT8	62.97	8.47	35	3.9	2	2	2	1.097	1.003	1.009	0.92	0.937	1.014	5.98	0.923448	0.131722
Q9NQY0	Bridging integrator 3	BIN3	35.43	6.95	56	12.6	4	3	3	1.014	0.994	0.981	0.984	0.974	1.033	5.98	1.00067	0.9762
O14818	Proteasome subunit alpha type-7	PSMA7	33.31	8.6	496	41.1	28	10	10	1.137	1.142	1.087	0.899	0.857	0.858	5.98	0.776589	0.05
O43617	Trafficking protein particle complex subunit 3	TRAPPC3	22.72	4.88	66	15	4	3	3	1.083	1.052	1.045	0.895	0.971	0.934	5.98	0.880503	0.05
O75346	Zinc finger protein 253	ZNF253	74.34	9.32	27	1.2	2	1	1	1.225	0.997	1.019	0.949	0.857	0.933	5.98	0.84511	0.135003
O96000	NADH dehydrogenase [ubiquinone] 1 beta subcomplex subunit 10	NDUFB10	24.26	8.72	183	30.2	7	4	4	0.976	0.982	0.996	1.036	0.956	1.034	5.98	1.02437	0.460316
P13639	Elongation factor 2	EEF2	111.37	6.41	1860	46.9	103	36	35	1.186	1.193	1.037	0.86	0.923	0.781	5.98	0.750585	0.05
P41217	OX-2 membrane glycoprotein	CD200	35.54	8.78	71	3.6	2	1	1	1.023	1.017	1.043	0.943	0.972	0.982	5.98	0.939669	0.05
Q08378	Golgin subfamily A member 3	GOLGA3	192.74	5.34	346	8.5	15	10	10	1.234	1.229	1.209	0.745	0.789	0.774	5.98	0.62854	0.05
Q12756	Kinesin-like protein KIF1A	KIF1A	211.56	5.86	312	9.6	16	12	8	0.968	0.986	0.984	0.988	1.049	1.005	5.98	1.0354	0.189321
Q16539	Mitogen-activated protein kinase 14	MAPK14	46.08	5.48	70	9.2	4	3	4	1.098	1.117	1.093	0.896	0.864	0.912	5.98	0.807739	0.05
Q5TH69	Brefeldin A-inhibited guanine nucleotide-exchange protein 3	ARFGEF3	269.07	5.54	95	3.3	7	6	6	1.08	1.172	1.14	0.873	0.81	0.905	5.98	0.762972	0.05
Q7Z3J2	UPF0505 protein C16orf62	C16orf62	126.21	6.82	175	7.4	6	6	6	0.924	0.967	0.944	1.05	0.999	1.096	5.98	1.10935	0.05
Q8NBX0	Saccharopine dehydrogenase-like oxidoreductase	SCCPDH	53.88	9.24	310	9.8	13	4	4	0.767	0.802	0.743	1.232	1.156	1.28	5.98	1.58651	0.05
Q8NFH4	Nucleoporin Nup37	NUP37	40.58	5.55	49	6.1	2	2	2	1.126	1.07	1.053	1	0.846	0.885	5.98	0.840566	0.05
Q92616	Translational activator GCN1	GCN1L1	332.09	7.29	767	12.1	37	29	32	1.058	1.046	1.031	0.952	0.956	0.937	5.98	0.907496	0.05
Q92888	Rho guanine nucleotide exchange factor 1	ARHGEF1	113.37	5.47	44	3.2	2	2	3	1.054	0.955	1.049	0.96	0.995	0.967	5.98	0.955526	0.292605
Q9UK99	F-box only protein 3	FBXO3	60.19	4.88	36	4.2	2	2	3	1.177	1.139	1.09	0.852	0.813	0.909	5.98	0.755725	0.05
[truncated: 4,079 more rows]
