# Supplementary material
Source: Frontiers journal article supplement (https://www.frontiersin.org/articles/428514)
Supplement: Table_2.xls [file Table_2.xls]

## Sheet: Sheet 1
Supplemental Table 2. Statistically significant KEGG pathways identified from 6076 protiens in NFPAs.
KEGG pathway name	Database	ID	Input number	Background number	p-value	Corrected p-value	Input	Hyperlink
Metabolic pathways	KEGG PATHWAY	hsa01100	664	1832	3.80082e-24	1.14025e-21	Q96I99|Q99943|Q8TBF2|Q15274|P08574|Q96NU7|Q13057|O00142|P12694|P22392|Q9NZL9|P04075|P30613|Q13724|P00156|P05108|Q8N428|Q6UB35|Q01970|P51553|P52209|P24928|Q2TB90|Q8IZ52|P07919|Q9UBM8|Q9NVE7|P30041|Q9UBM7|Q9BV20|P37837|Q9Y673|Q969N2|Q6ZMR3|Q14061|Q9Y697|Q9NRZ7|Q9NRZ5|Q16854|Q9NYQ3|Q9UJ70|Q9NY59|P15121|Q16795|Q15165|Q16798|P16050|O15254|Q99424|O00764|P39656|Q96T66|Q8TDX5|Q9HAN9|O00400|P29401|Q13907|…	http://www.genome.jp/kegg-bin/show_pathway?hsa01100/hsa:11041%09red/hsa:2632%09red/hsa:2639%09red/hsa:283871%09red/hsa:84720%09red/hsa:1503%09red/hsa:5438%09red/hsa:55967%09red/hsa:8813%09red/hsa:5434%09red/hsa:5436%09red/hsa:5437%09red/hsa:5430%09red/hsa:5431%09red/hsa:6448%09red/hsa:9514%09red/hsa:112817%09red/hsa:9249%09red/hsa:8789%09red/hsa:11343%09red/hsa:549%09red/hsa:2937%09red/hsa:349565…
Endocytosis	KEGG PATHWAY	hsa04144	165	394	3.06054e-10	2.07163e-08	P51149|P0DMV8|Q9HD42|P43250|Q9Y4K3|Q96FZ7|Q15276|Q9H9H4|Q9Y5X3|P84085|P42566|P49407|Q9UMY4|O75061|O95630|Q99816|Q13191|Q9NP61|Q92747|Q9Y371|Q9NR46|Q9BRG1|Q7LBR1|P60953|Q96CF2|Q9Y3E7|Q9BXF6|Q9NZZ3|P02786|Q96T51|Q9H0M0|A5D8V6|Q7Z3T8|O75351|Q8TEW0|P62330|Q8NEZ2|Q9UPQ3|O15144|O15145|P30511|Q9NP79|P52907|O60331|O60282|Q99961|Q99962|Q99963|P11717|Q8WUX9|Q8WU79|Q9BPX5|P51148|Q00610|Q9ULH1|Q12768|P61020|…	http://www.genome.jp/kegg-bin/show_pathway?hsa04144/hsa:8394%09red/hsa:408%09red/hsa:10109%09red/hsa:3482%09red/hsa:64744%09red/hsa:55048%09red/hsa:9897%09red/hsa:55040%09red/hsa:79643%09red/hsa:3312%09red/hsa:9815%09red/hsa:9135%09red/hsa:23327%09red/hsa:8729%09red/hsa:156%09red/hsa:7037%09red/hsa:3799%09red/hsa:8724%09red/hsa:8723%09red/hsa:79720%09red/hsa:3306%09red/hsa:11267%09red/hsa:11059%0…
Protein processing in endoplasmic reticulum	KEGG PATHWAY	hsa04141	122	260	3.45272e-10	2.07163e-08	P0DMV8|Q9UKV5|P30101|P27797|Q9UK22|Q99442|P17655|Q13217|O14733|Q9P2E9|P07900|Q9UBS4|O75460|Q9NZL4|Q8NHG7|P27824|Q13724|P25686|Q99933|O60884|Q9Y4L1|Q9BZQ6|P53779|Q96GF1|Q9UNL2|Q14703|Q92890|O95155|P30040|P25685|Q12933|Q9UNE7|P14314|Q9BQE4|Q9UNZ2|Q16611|O60337|P04844|Q9Y263|Q96DZ1|Q9UBV2|Q9BZV1|Q96HE7|P54727|P54725|Q8TAT6|O76024|O95757|P39656|O60476|Q9NRR5|Q9Y6B6|P55072|P49257|O95816|P51571|P51572|…	http://www.genome.jp/kegg-bin/show_pathway?hsa04141/hsa:55432%09red/hsa:51465%09red/hsa:26270%09red/hsa:64374%09red/hsa:54431%09red/hsa:10905%09red/hsa:6238%09red/hsa:3998%09red/hsa:55968%09red/hsa:3312%09red/hsa:51128%09red/hsa:8720%09red/hsa:80700%09red/hsa:10113%09red/hsa:1603%09red/hsa:55757%09red/hsa:267%09red/hsa:84447%09red/hsa:23193%09red/hsa:56893%09red/hsa:3320%09red/hsa:3326%09red/hsa:…
Focal adhesion	KEGG PATHWAY	hsa04510	118	321	1.53243e-05	0.000241963	P04275|Q15942|O75914|P15498|P17655|Q9NVD7|P08572|P55268|P31749|P62140|P24043|P35442|P35443|P50552|Q05397|P61586|P13612|P27361|P08123|P53779|Q15746|P60953|P61224|O75116|O15530|Q14315|P63000|P04004|P62136|O60237|P12109|O60331|Q13177|P49023|P51636|Q01955|P12814|P21333|Q16363|P12111|P12110|P08648|P07996|P46109|P46108|Q9BZL4|P23229|P18084|P42338|P02458|P02452|P15153|Q13753|P62993|Q16787|Q13464|O60610|…	http://www.genome.jp/kegg-bin/show_pathway?hsa04510/hsa:3918%09red/hsa:3911%09red/hsa:3910%09red/hsa:3913%09red/hsa:3912%09red/hsa:3915%09red/hsa:2909%09red/hsa:5829%09red/hsa:2316%09red/hsa:5602%09red/hsa:2335%09red/hsa:7057%09red/hsa:3655%09red/hsa:5159%09red/hsa:103910%09red/hsa:80310%09red/hsa:60%09red/hsa:394%09red/hsa:63923%09red/hsa:572%09red/hsa:5500%09red/hsa:7060%09red/hsa:55742%09red/h…
Regulation of actin cytoskeleton	KEGG PATHWAY	hsa04810	116	327	8.72266e-05	0.000872266	Q9UQB8|O75914|P15498|O00401|P08571|Q92888|P62140|P06396|Q14155|Q05397|Q92747|P13612|P26038|Q15746|P60953|Q8N8S7|O75116|P63000|P62136|Q03113|O15143|O15144|O15145|O60331|P19634|Q13177|P35580|P49023|Q9BPX5|Q9NYB9|P10301|P62328|P12814|O60237|P48426|P08648|P46109|P46108|Q9BZL4|Q9Y6U3|P18084|P35241|P42338|Q7L576|P78356|Q9Y281|P15153|Q13464|O60610|P00734|P27986|P35579|P00540|P10398|O15511|P15311|P55160|…	http://www.genome.jp/kegg-bin/show_pathway?hsa04810/hsa:200576%09red/hsa:8396%09red/hsa:8394%09red/hsa:10109%09red/hsa:7430%09red/hsa:2909%09red/hsa:929%09red/hsa:6237%09red/hsa:5829%09red/hsa:5605%09red/hsa:2147%09red/hsa:2335%09red/hsa:4342%09red/hsa:9138%09red/hsa:3655%09red/hsa:3689%09red/hsa:5217%09red/hsa:5159%09red/hsa:3845%09red/hsa:103910%09red/hsa:80310%09red/hsa:23191%09red/hsa:8976%09…
Huntington's disease	KEGG PATHWAY	hsa05016	115	278	2.30833e-07	7.69442e-06	Q00722|Q9GZM3|P08574|P20674|Q15147|P24928|O14561|Q16718|P63010|P04179|Q9Y277|Q01970|P00395|P48047|Q9NQ66|P07919|O43920|Q9NYC9|O95299|P00403|P31930|O00483|P05141|Q9Y6M9|Q16795|O96000|P09669|P25705|O14548|P42858|Q9NX14|Q92769|P19388|Q00610|Q96KJ9|P19404|O75438|P51970|P78352|Q00059|O00268|O95139|P09496|P09497|Q9UKL0|P07203|O43181|P36542|P56556|O75380|Q9NRX3|P05496|O75306|P14854|P36954|P14927|O00217|…	http://www.genome.jp/kegg-bin/show_pathway?hsa05016/hsa:10105%09red/hsa:23186%09red/hsa:5438%09red/hsa:55967%09red/hsa:1639%09red/hsa:5434%09red/hsa:5436%09red/hsa:5437%09red/hsa:5430%09red/hsa:5431%09red/hsa:54539%09red/hsa:498%09red/hsa:2876%09red/hsa:27089%09red/hsa:548644%09red/hsa:9377%09red/hsa:9167%09red/hsa:23236%09red/hsa:84701%09red/hsa:7052%09red/hsa:56901%09red/hsa:54205%09red/hsa:174…
Alzheimer's disease	KEGG PATHWAY	hsa05010	111	257	6.72901e-08	2.52338e-06	Q00722|P17655|P20674|Q15147|P08473|O75460|P25445|O14561|P00156|Q01970|P63098|P00395|P48047|Q00535|Q9NQ66|P30049|O43920|O95299|P00403|P08574|P31930|P05067|O00483|O14949|Q9Y6M9|Q16795|O96000|P09669|P25705|O14548|Q08209|Q9NX14|Q16718|P49810|P14735|Q96BI3|Q92542|Q96KJ9|P19404|O75438|P51970|Q99714|O95139|O14983|Q14571|O43181|Q14573|P36542|O43674|P56556|Q92934|O75380|Q9NRX3|P05496|O75306|P14854|P16298|…	http://www.genome.jp/kegg-bin/show_pathway?hsa05010/hsa:487%09red/hsa:489%09red/hsa:488%09red/hsa:801%09red/hsa:5534%09red/hsa:5530%09red/hsa:5533%09red/hsa:5532%09red/hsa:3416%09red/hsa:54539%09red/hsa:4137%09red/hsa:498%09red/hsa:4035%09red/hsa:1020%09red/hsa:27089%09red/hsa:355%09red/hsa:9377%09red/hsa:9167%09red/hsa:572%09red/hsa:23236%09red/hsa:84701%09red/hsa:3028%09red/hsa:83464%09red/hsa:…
Spliceosome	KEGG PATHWAY	hsa03040	108	190	6.59775e-13	9.89662e-11	P0DMV8|Q9BZJ0|Q96DI7|Q9ULR0|Q8NI27|Q9UKV3|O43447|P52298|P08579|Q15029|P62995|P62304|P61978|Q86V81|Q15393|Q8IWX8|Q15428|Q96NC0|P07910|Q01130|Q8WYA6|Q13838|O95391|O60231|Q9NW64|Q7RTV0|O43290|P09661|Q13573|P52272|Q9Y4Z0|Q9UHX1|Q86XP3|Q9Y3B4|Q15459|Q15365|O75533|Q9UMS4|P38159|P55769|P08621|P09651|P09012|Q9UNP9|Q92620|Q9Y3C6|Q9Y5S9|Q8WWY3|O43660|O75934|P11142|Q16629|O43172|Q08170|Q09161|O14776|O95777|…	http://www.genome.jp/kegg-bin/show_pathway?hsa03040/hsa:22938%09red/hsa:23350%09red/hsa:57187%09red/hsa:10907%09red/hsa:3312%09red/hsa:9410%09red/hsa:22985%09red/hsa:11325%09red/hsa:84321%09red/hsa:84991%09red/hsa:9092%09red/hsa:55110%09red/hsa:56259%09red/hsa:84844%09red/hsa:57461%09red/hsa:23020%09red/hsa:9416%09red/hsa:23451%09red/hsa:23450%09red/hsa:10915%09red/hsa:51645%09red/hsa:24148%09red…
Proteoglycans in cancer	KEGG PATHWAY	hsa05205	108	316	0.000331583	0.00255064	P31749|P51884|Q9UBS0|Q92888|P62140|P62753|P25445|Q13191|Q05397|Q14247|P27361|P53778|Q01484|P26038|P60953|P35052|P07711|O75116|O15530|P14317|Q14315|P63000|P04004|P62136|O60237|O15264|Q15759|P19634|P49023|P16070|P16885|P10301|P21333|P08648|P07996|Q9BZL4|P18084|P35241|P42338|Q53EL6|P62993|Q96P44|Q13464|P14780|Q13557|P27986|P10398|Q14571|Q14573|Q06124|P15311|Q03135|P42345|P07585|O14974|Q13153|P01137|…	http://www.genome.jp/kegg-bin/show_pathway?hsa05205/hsa:3339%09red/hsa:7430%09red/hsa:5781%09red/hsa:6237%09red/hsa:84309%09red/hsa:5829%09red/hsa:1975%09red/hsa:5058%09red/hsa:2335%09red/hsa:2317%09red/hsa:9138%09red/hsa:6199%09red/hsa:6194%09red/hsa:3845%09red/hsa:4087%09red/hsa:4478%09red/hsa:10855%09red/hsa:818%09red/hsa:1514%09red/hsa:816%09red/hsa:817%09red/hsa:815%09red/hsa:7057%09red/hsa:…
RNA transport	KEGG PATHWAY	hsa03013	105	220	2.81236e-09	1.40618e-07	Q8NI27|Q9UKV3|O60841|Q9BQ52|Q05639|P52298|P11940|O15372|O15371|O00422|P46060|Q8NFH5|Q86V81|P55010|Q14240|P78406|Q8WXD5|Q8WUM0|O14602|P54105|Q13838|P20042|P41091|O75694|P51116|P78346|P78344|Q9UBU9|Q9NR50|P60228|Q12769|Q96A72|Q96EE3|P52948|Q9UHI6|O60573|Q9H814|Q13144|P49790|P49792|Q14974|O43592|Q9BW27|Q7Z3B4|P51114|Q7L576|P12270|O75821|O75822|Q5SRE5|Q9H307|Q92621|O14744|Q9Y5S9|Q8N1F7|Q9HAV4|Q13310|…	http://www.genome.jp/kegg-bin/show_pathway?hsa03013/hsa:1981%09red/hsa:1982%09red/hsa:1983%09red/hsa:11218%09red/hsa:57122%09red/hsa:9818%09red/hsa:2332%09red/hsa:1973%09red/hsa:1975%09red/hsa:1974%09red/hsa:1977%09red/hsa:8086%09red/hsa:8087%09red/hsa:22985%09red/hsa:8894%09red/hsa:84321%09red/hsa:8891%09red/hsa:8890%09red/hsa:8893%09red/hsa:7329%09red/hsa:8666%09red/hsa:8667%09red/hsa:8664%09re…
Ribosome	KEGG PATHWAY	hsa03010	103	182	2.71186e-12	2.71186e-10	P62851|P22090|P18621|P62854|P62857|Q9Y3U8|Q9Y3D3|P82912|P30050|P62913|P82914|P62917|P49406|P62753|P62750|Q9H0U6|P62906|P83731|Q9Y2R5|P23396|Q9Y2R9|P84098|P35268|Q96A35|P40429|P32969|P42766|P49207|P62081|P05386|P05387|P82932|P82933|P05388|P62979|P39019|P62424|Q9NWU5|Q9NVS2|P46776|P62280|Q02543|P62847|Q9Y3B7|Q5T653|P82921|P39023|P61313|Q9BYD6|Q9BYD3|Q9BYD2|P61247|P08865|P27635|P62888|Q07020|P60866|…	http://www.genome.jp/kegg-bin/show_pathway?hsa03010/hsa:64968%09red/hsa:64969%09red/hsa:64963%09red/hsa:64960%09red/hsa:64965%09red/hsa:124995%09red/hsa:23521%09red/hsa:6234%09red/hsa:6233%09red/hsa:6231%09red/hsa:6230%09red/hsa:6130%09red/hsa:6132%09red/hsa:6133%09red/hsa:6134%09red/hsa:6135%09red/hsa:6136%09red/hsa:6137%09red/hsa:63875%09red/hsa:6139%09red/hsa:51121%09red/hsa:6194%09red/hsa:619…
Oxidative phosphorylation	KEGG PATHWAY	hsa00190	103	197	2.87543e-07	8.6263e-06	P08574|P20674|Q9Y487|O14561|Q16718|P21281|P21283|P00395|P48047|Q9H008|P07919|Q7KZN9|P61421|P00403|P38606|P31930|Q14061|O00483|O14949|Q9Y6M9|Q16795|O96000|P03923|P09669|P25705|O14548|P56385|Q9NX14|P00156|Q96KJ9|P19404|O75438|P51970|O95299|O95139|O95182|O43181|P13073|P36543|P56556|Q9Y5K8|Q15904|O75380|Q9NRX3|P05496|O75306|P14854|O00217|Q9UDW1|O95670|P24539|O43674|Q15181|O43678|Q9H2U2|O43920|O75251|…	http://www.genome.jp/kegg-bin/show_pathway?hsa00190/hsa:10632%09red/hsa:55967%09red/hsa:54539%09red/hsa:64077%09red/hsa:498%09red/hsa:51606%09red/hsa:9377%09red/hsa:9167%09red/hsa:84701%09red/hsa:27089%09red/hsa:56901%09red/hsa:1537%09red/hsa:51079%09red/hsa:4723%09red/hsa:4722%09red/hsa:4720%09red/hsa:4726%09red/hsa:4725%09red/hsa:4724%09red/hsa:4729%09red/hsa:4728%09red/hsa:10063%09red/hsa:529%…
Epstein-Barr virus infection	KEGG PATHWAY	hsa05169	103	312	0.0011546	0.00721623	P0DMV8|Q13114|P31749|P51665|Q9Y4K3|Q9GZM3|P04440|O14733|Q9Y6K9|O43242|P05362|P35998|P31946|Q8NEV1|P43405|P24928|P53778|P53779|Q13200|P48556|O14920|Q12933|P52564|P62333|P61981|Q9UNM6|P08670|Q00403|P30511|O15264|O00487|Q15759|P19784|Q15750|P16885|P36954|P19525|P04792|Q15008|P19838|Q92769|Q7KZF4|Q93009|P06400|P27348|P42338|P63104|P27986|Q9UQL6|P62191|Q9ULX6|Q9Y2S0|O14980|Q9NW08|Q9Y618|P11142|P43686|…	http://www.genome.jp/kegg-bin/show_pathway?hsa05169/hsa:29110%09red/hsa:22938%09red/hsa:7431%09red/hsa:23586%09red/hsa:1460%09red/hsa:7533%09red/hsa:7532%09red/hsa:7531%09red/hsa:5438%09red/hsa:7534%09red/hsa:5434%09red/hsa:3315%09red/hsa:5437%09red/hsa:5430%09red/hsa:5431%09red/hsa:5708%09red/hsa:5709%09red/hsa:5706%09red/hsa:5707%09red/hsa:5704%09red/hsa:5705%09red/hsa:5702%09red/hsa:3125%09red…
Parkinson's disease	KEGG PATHWAY	hsa05012	94	215	4.28447e-07	1.10246e-05	P22314|P08574|P20674|O14933|O14561|Q16718|P63096|Q9Y277|P00395|P48047|P07919|P00403|O95622|P31930|P09936|O00483|P05141|Q9Y6M9|O43464|Q16795|O96000|P03923|P09669|P25705|O14548|Q9NX14|P00156|Q96KJ9|P19404|O75438|P51970|Q8N2K1|O95299|P05496|Q99719|Q99497|O43181|P13073|O43674|P56556|P41226|O75380|Q9NRX3|O95139|O75306|P14854|P17612|O00217|Q9UDW1|O95182|P24539|P45880|O43678|P68036|O43920|P04899|O75251|…	http://www.genome.jp/kegg-bin/show_pathway?hsa05012/hsa:10105%09red/hsa:55967%09red/hsa:54539%09red/hsa:9246%09red/hsa:498%09red/hsa:118424%09red/hsa:7332%09red/hsa:27089%09red/hsa:9377%09red/hsa:9167%09red/hsa:84701%09red/hsa:27429%09red/hsa:5413%09red/hsa:51465%09red/hsa:7345%09red/hsa:111%09red/hsa:56901%09red/hsa:54205%09red/hsa:1537%09red/hsa:51079%09red/hsa:5566%09red/hsa:5567%09red/hsa:472…
Carbon metabolism	KEGG PATHWAY	hsa01200	92	185	5.73818e-09	2.45922e-07	Q96I99|P40939|P05166|P30613|P00558|P48735|P14618|Q3LXA3|P05165|P51553|P52209|P24752|P10768|P40925|P40926|Q8TD30|P60891|Q08426|P48728|P00367|P37837|Q9P2R7|Q96GA7|Q9NYQ3|P22033|P08559|Q16798|P16219|Q9NUB1|Q2TB90|Q01813|Q02252|Q96AT9|Q99798|Q96PE7|O95336|A6NDG6|P17174|P11498|P07205|P09467|O43837|Q9Y617|P04075|O43175|P11908|P34896|P34897|P21399|O95479|P18669|P36957|P05062|P49448|P60174|P04406|P10515|…	http://www.genome.jp/kegg-bin/show_pathway?hsa01200/hsa:2539%09red/hsa:283871%09red/hsa:26275%09red/hsa:2023%09red/hsa:2026%09red/hsa:2027%09red/hsa:48%09red/hsa:128%09red/hsa:5232%09red/hsa:5230%09red/hsa:3417%09red/hsa:3418%09red/hsa:3419%09red/hsa:8789%09red/hsa:29968%09red/hsa:55753%09red/hsa:50%09red/hsa:3030%09red/hsa:5226%09red/hsa:25796%09red/hsa:6120%09red/hsa:4329%09red/hsa:2731%09red/h…
Phagosome	KEGG PATHWAY	hsa04145	91	237	3.8822e-05	0.00052939	P51149|P51148|P68366|P68363|P27797|P04440|Q13885|P08571|Q03518|Q03519|Q9Y487|P04839|P05164|P35442|O15400|P27824|Q9BUF5|O75396|P21281|P21283|Q8NCM8|Q9NY65|P61421|P02786|P07711|P63000|P30511|P00736|P38606|Q9H4B7|P18084|Q13509|P61020|Q8NEB9|P08648|P07996|Q15080|A6NHL2|P22897|Q15075|Q9P2W9|P13473|O95670|Q86Y82|P36543|P35443|P21757|Q9Y5K8|P13498|Q15904|O60603|Q14204|P06756|Q9UBG0|P20036|O14964|P79483|…	http://www.genome.jp/kegg-bin/show_pathway?hsa04145/hsa:200576%09red/hsa:10952%09red/hsa:9146%09red/hsa:53407%09red/hsa:3916%09red/hsa:929%09red/hsa:81027%09red/hsa:7057%09red/hsa:7037%09red/hsa:3122%09red/hsa:3125%09red/hsa:3127%09red/hsa:79659%09red/hsa:718%09red/hsa:9554%09red/hsa:51807%09red/hsa:715%09red/hsa:203068%09red/hsa:9114%09red/hsa:347733%09red/hsa:1514%09red/hsa:811%09red/hsa:3134%0…
Non-alcoholic fatty liver disease (NAFLD)	KEGG PATHWAY	hsa04932	90	226	1.44476e-05	0.000240794	P31749|P30613|P08574|P20674|O75460|P25445|O14561|Q16718|O00459|Q16584|P00395|P53779|Q12933|P60953|P07919|P54619|O14920|P00403|P63000|P31930|O00483|O43741|O14949|Q9Y6M9|Q16795|O96000|P09669|O14548|P42338|Q9NX14|P19838|P00156|Q96KJ9|P19404|O75438|P51970|O95299|O95139|P27986|O43181|P13073|O43674|P56556|O75380|P01137|Q9NRX3|O75306|P14854|P14927|O00217|Q9UDW1|O95182|O43920|P06213|O43678|O15239|O75251|…	http://www.genome.jp/kegg-bin/show_pathway?hsa04932/hsa:55967%09red/hsa:54539%09red/hsa:4700%09red/hsa:3643%09red/hsa:9377%09red/hsa:9167%09red/hsa:9370%09red/hsa:84701%09red/hsa:7186%09red/hsa:5313%09red/hsa:56901%09red/hsa:54205%09red/hsa:4790%09red/hsa:208%09red/hsa:5970%09red/hsa:998%09red/hsa:4694%09red/hsa:207%09red/hsa:1537%09red/hsa:51079%09red/hsa:4723%09red/hsa:4722%09red/hsa:4720%09red…
Tight junction	KEGG PATHWAY	hsa04530	86	197	0.000485624	0.00355335	Q8TF72|P31749|P11802|Q7Z406|Q9UKX3|P35749|Q9Y2J2|P08754|O14950|Q07157|O95484|O14936|P07947|O60645|Q6P1M3|Q9UDY2|P05129|P60484|P05771|P10301|Q66LE6|P63096|P12814|Q9Y624|P20337|P41743|Q05655|Q9P2M7|Q8N3R9|O43491|P11171|P61586|P60709|P17252|Q14247|Q8TEW0|P63151|P04899|P30153|Q9Y243|Q9BX67|P24844|P51153|P26232|P35580|P60953|P67775|P31751|P12931|O15551|P35579|P35222|Q15334|P35221|Q9H4G0|P55196|Q8NEV1|…	http://www.genome.jp/kegg-bin/show_pathway?hsa04530/hsa:5584%09red/hsa:58494%09red/hsa:5580%09red/hsa:5581%09red/hsa:5582%09red/hsa:4627%09red/hsa:57530%09red/hsa:9218%09red/hsa:9080%09red/hsa:283106%09red/hsa:1019%09red/hsa:6709%09red/hsa:5865%09red/hsa:9223%09red/hsa:10398%09red/hsa:1460%09red/hsa:5579%09red/hsa:5578%09red/hsa:3993%09red/hsa:55844%09red/hsa:208%09red/hsa:3996%09red/hsa:6237%09r…
Platelet activation	KEGG PATHWAY	hsa04611	82	182	8.96581e-07	2.06903e-05	P17301|P08514|Q15759|P62834|P31749|Q00722|P02461|Q86UX7|P08754|P02679|O14950|P28482|Q7LDG7|P05556|O43306|P16885|Q13094|P17612|O00161|P04275|Q92888|Q9Y4G6|P36873|P05106|Q06187|Q13586|P62140|O14974|P41743|Q13237|Q02108|O00459|P63096|P02671|O95622|P61586|P27361|P02675|P14770|Q01970|O60266|P04899|P30273|P61224|P53778|P60709|P42338|P50552|Q14643|Q15746|P12318|P13224|P02452|P12931|Q14344|Q9NZN5|P50148|…	http://www.genome.jp/kegg-bin/show_pathway?hsa04611/hsa:5584%09red/hsa:3709%09red/hsa:8773%09red/hsa:2983%09red/hsa:2982%09red/hsa:6850%09red/hsa:23236%09red/hsa:1277%09red/hsa:3937%09red/hsa:2266%09red/hsa:2811%09red/hsa:10672%09red/hsa:6916%09red/hsa:4067%09red/hsa:2770%09red/hsa:1278%09red/hsa:5592%09red/hsa:7450%09red/hsa:4638%09red/hsa:3708%09red/hsa:7094%09red/hsa:10000%09red/hsa:4659%09red…
Purine metabolism	KEGG PATHWAY	hsa00230	82	250	0.00287335	0.0148621	Q01433|Q01432|Q9BSD7|Q8TCD5|Q9Y2S0|O43252|Q9BY32|P54819|Q16854|P11908|P31939|P21589|Q9GZM3|Q7LG56|Q9Y5B8|Q96G03|O43306|P36959|P50583|P36954|P22234|P30876|Q8TCS8|P52434|O00408|Q86TP1|P36871|Q9UKK9|O95263|Q9P2T1|Q96DE0|P14618|Q9BW91|Q13232|Q9Y3D8|P30613|Q02108|O43924|O95622|P30566|Q9BUI4|Q16774|P49915|P62487|P07741|O60266|Q9Y6X5|P24928|P27144|Q9H9Y6|P00492|P30520|O76074|Q8WVQ1|P22102|O75414|P19388|…	http://www.genome.jp/kegg-bin/show_pathway?hsa00230/hsa:4907%09red/hsa:9061%09red/hsa:5147%09red/hsa:4860%09red/hsa:51292%09red/hsa:11164%09red/hsa:2982%09red/hsa:8654%09red/hsa:8833%09red/hsa:159%09red/hsa:3704%09red/hsa:58497%09red/hsa:1716%09red/hsa:1633%09red/hsa:353%09red/hsa:9060%09red/hsa:10623%09red/hsa:55703%09red/hsa:84284%09red/hsa:53343%09red/hsa:272%09red/hsa:271%09red/hsa:5236%09red…
Lysosome	KEGG PATHWAY	hsa04142	78	181	5.926e-06	0.00011852	Q9NRA2|Q8NBK3|O00754|P56202|Q93050|P11717|O43747|P10619|Q15904|Q9UK23|P50897|P06280|P08311|Q92572|P06865|P09668|Q9UJJ9|Q9UBR2|Q9Y487|P59780|P15289|O14617|P10253|P17900|P07339|P16278|P09497|P04062|P07686|O00462|Q9UJY4|Q9UJY5|Q9BZC7|P07602|Q00610|P25774|P08236|Q99538|P07711|Q8NCC3|P61966|P15848|Q99523|Q13488|Q9BXS5|Q9Y2T2|P07858|Q9UBX1|O00203|Q9Y6Q5|P09496|O15118|P34059|P11117|P53677|Q9NP78|P13473|…	http://www.genome.jp/kegg-bin/show_pathway?hsa04142/hsa:4864%09red/hsa:2799%09red/hsa:4669%09red/hsa:427%09red/hsa:3482%09red/hsa:5538%09red/hsa:1211%09red/hsa:1212%09red/hsa:3916%09red/hsa:4125%09red/hsa:527%09red/hsa:4126%09red/hsa:10947%09red/hsa:2717%09red/hsa:537%09red/hsa:23163%09red/hsa:10577%09red/hsa:26088%09red/hsa:23545%09red/hsa:2588%09red/hsa:20%09red/hsa:1522%09red/hsa:2760%09red/hs…
Insulin signaling pathway	KEGG PATHWAY	hsa04910	77	214	0.000474339	0.00355335	Q02750|P31749|Q8N122|P30613|Q13085|P31323|P15735|O43741|P13861|P45984|P19367|P49327|P06737|Q9UBS0|P17612|Q13131|P36873|Q92574|P53779|P09467|P62140|P62753|Q15382|P18031|P62993|P41743|O60573|Q13191|O14920|Q2TB90|P27361|P06213|P36507|P46109|O75955|Q15642|O15357|P49815|Q93100|P28482|P10586|Q07889|P42338|Q9H7J1|Q9BX66|P10398|P46020|P31751|Q92934|P54619|P46108|P10644|P46019|P35558|O00459|P22681|P27986|…	http://www.genome.jp/kegg-bin/show_pathway?hsa04910/hsa:5584%09red/hsa:5604%09red/hsa:5170%09red/hsa:10000%09red/hsa:572%09red/hsa:2885%09red/hsa:5256%09red/hsa:5105%09red/hsa:5106%09red/hsa:5594%09red/hsa:1977%09red/hsa:5576%09red/hsa:10580%09red/hsa:90673%09red/hsa:7249%09red/hsa:801%09red/hsa:868%09red/hsa:1399%09red/hsa:1398%09red/hsa:5573%09red/hsa:5257%09red/hsa:867%09red/hsa:7248%09red/hsa…
Tuberculosis	KEGG PATHWAY	hsa05152	77	268	0.0409347	0.11164	P51149|P51148|Q15904|P31749|Q93050|P08571|P42224|Q15759|P01137|P25208|O60603|P04440|P99999|P79483|P33241|P45984|P16298|Q9UDY8|P61020|P04233|P05107|Q9Y487|Q9NZN5|P15260|P10809|Q9UQM7|P07339|P19838|Q8NEB9|P43405|P01024|P61586|P27361|Q04206|Q9NWZ3|P49913|P63098|P20036|P30273|P28482|P53778|P25774|Q08209|P38646|P18428|P31146|P22897|P12318|P12931|P20702|Q13554|Q13488|Q15075|P61421|O43353|P31751|Q9Y4K3|…	http://www.genome.jp/kegg-bin/show_pathway?hsa05152/hsa:5289%09red/hsa:3329%09red/hsa:4360%09red/hsa:5869%09red/hsa:10000%09red/hsa:817%09red/hsa:6850%09red/hsa:5532%09red/hsa:9114%09red/hsa:3916%09red/hsa:387%09red/hsa:527%09red/hsa:4046%09red/hsa:537%09red/hsa:5868%09red/hsa:929%09red/hsa:801%09red/hsa:5534%09red/hsa:3459%09red/hsa:1520%09red/hsa:820%09red/hsa:1509%09red/hsa:572%09red/hsa:3313%…
cGMP-PKG signaling pathway	KEGG PATHWAY	hsa04022	75	261	0.0208323	0.0726707	P04899|O95622|P31749|Q00722|P05023|P78347|P08754|Q16720|Q01970|P05026|P16615|P36507|P32418|O43306|Q15147|P50148|P54709|Q14573|P36873|P05141|P63096|P62140|O14974|O76074|O00408|P50993|Q13237|Q02108|O00459|Q9UPR5|Q01814|P13637|P50552|P30405|P14415|P06213|Q9Y277|P61586|Q01668|Q9Y6F6|P63098|P27361|P12236|P16298|Q14814|Q9Y243|P42338|P24844|Q14643|Q15746|Q08209|P12235|P31751|Q92934|Q14344|P48454|Q13464|…	http://www.genome.jp/kegg-bin/show_pathway?hsa04022/hsa:3708%09red/hsa:3709%09red/hsa:5581%09red/hsa:2983%09red/hsa:2982%09red/hsa:5534%09red/hsa:10105%09red/hsa:10672%09red/hsa:5604%09red/hsa:387%09red/hsa:487%09red/hsa:481%09red/hsa:7419%09red/hsa:483%09red/hsa:482%09red/hsa:7416%09red/hsa:7417%09red/hsa:489%09red/hsa:488%09red/hsa:10398%09red/hsa:5332%09red/hsa:801%09red/hsa:4638%09red/hsa:296…
Influenza A	KEGG PATHWAY	hsa05164	75	259	0.047702	0.125532	P0DMV8|Q15759|Q02750|P31749|P36507|P27986|P05771|P78406|P42224|Q04206|P52594|P52294|P04440|Q13217|P29590|P52292|O14733|P45984|O95786|P19525|Q9BUJ2|Q86UT6|Q15653|O14920|P14324|O95639|P52948|P52630|P13501|P25685|P19838|O15393|O00459|P00747|P27361|P60709|Q9P2K8|Q9NWZ3|P29728|P25445|P20036|P12236|Q7Z434|Q9UBU9|P20591|P53778|P53779|P42338|Q9UHD2|P17252|P29466|P05362|P79483|P45985|Q86U42|P54652|P15260|…	http://www.genome.jp/kegg-bin/show_pathway?hsa05164/hsa:29110%09red/hsa:5604%09red/hsa:3836%09red/hsa:4939%09red/hsa:10000%09red/hsa:3383%09red/hsa:3838%09red/hsa:4940%09red/hsa:7706%09red/hsa:5340%09red/hsa:3312%09red/hsa:355%09red/hsa:3115%09red/hsa:23586%09red/hsa:7416%09red/hsa:7514%09red/hsa:8106%09red/hsa:5579%09red/hsa:5578%09red/hsa:3337%09red/hsa:54205%09red/hsa:3459%09red/hsa:2224%09red…
Dopaminergic synapse	KEGG PATHWAY	hsa04728	72	207	0.0014432	0.00865918	P21397|Q15759|Q16539|P31749|Q00722|P27338|P62873|P08754|P62879|Q14738|P17252|P16520|P21964|O60282|P05129|P45984|P17612|P05771|P36873|P48544|Q66LE6|P62140|P59768|Q9UQM7|P48058|P62714|P63096|O95622|P01100|P63215|Q14643|P63218|Q01668|O60262|P50148|P63151|P49840|P04899|P16298|P53778|P53779|Q08209|P09471|P30153|P33176|P31751|Q9UBI6|Q13555|Q13554|P67775|Q15173|Q15172|Q9NQ66|P42261|Q01970|O14775|Q13557|…	http://www.genome.jp/kegg-bin/show_pathway?hsa04728/hsa:3708%09red/hsa:3709%09red/hsa:59345%09red/hsa:5582%09red/hsa:1312%09red/hsa:10000%09red/hsa:54331%09red/hsa:3798%09red/hsa:4129%09red/hsa:4128%09red/hsa:5332%09red/hsa:801%09red/hsa:5578%09red/hsa:2931%09red/hsa:55844%09red/hsa:5533%09red/hsa:5532%09red/hsa:5516%09red/hsa:2787%09red/hsa:818%09red/hsa:5602%09red/hsa:23236%09red/hsa:2783%09red…
Adrenergic signaling in cardiomyocytes	KEGG PATHWAY	hsa04261	70	230	0.0084712	0.0378973	Q15759|P19634|P31749|Q00722|P05023|P54289|P09493|Q16720|P05026|Q9Y698|Q8WZA2|P30153|O43306|Q15147|P54709|P50148|P32418|P17612|P36873|Q66LE6|P62140|Q9UQM7|Q7Z3S7|O75582|P50993|P06753|Q08289|P63096|Q01814|P13637|O95622|P14415|Q01970|Q01668|Q8IWT1|P08754|P63151|P27361|P04899|P28482|P53778|P42338|P17252|P27986|P67775|P31751|Q13557|Q13555|Q13554|P07951|Q14738|Q15173|Q15172|Q9NQ66|Q9NY47|O00459|P12883|…	http://www.genome.jp/kegg-bin/show_pathway?hsa04261/hsa:5529%09red/hsa:10000%09red/hsa:93589%09red/hsa:9252%09red/hsa:9254%09red/hsa:23236%09red/hsa:11069%09red/hsa:481%09red/hsa:483%09red/hsa:482%09red/hsa:488%09red/hsa:5332%09red/hsa:801%09red/hsa:5578%09red/hsa:55844%09red/hsa:208%09red/hsa:5567%09red/hsa:5516%09red/hsa:5515%09red/hsa:4635%09red/hsa:783%09red/hsa:781%09red/hsa:5499%09red/hsa:5…
Ubiquitin mediated proteolysis	KEGG PATHWAY	hsa04120	69	194	0.00160642	0.00926783	P30260|P22314|Q9Y385|Q9NR09|Q15751|P98170|Q9UNE7|Q9Y4K3|Q13620|Q9UK22|Q9UBT2|P29590|Q9UKB1|Q13617|O14933|Q8N3Y1|Q7Z7E8|Q15386|Q9H832|P61081|P22681|Q15369|P49427|P61086|P41226|Q14139|Q13191|Q9C0C9|Q9UBE0|P63279|Q9UMS4|O95714|P68036|Q86TM6|Q7Z6Z7|O75928|Q712K3|Q96J02|Q5GLZ8|Q8TBC4|Q93034|O95155|Q13356|Q13049|Q8N2K1|Q9UJX4|O00308|Q96LR5|Q969M7|Q13042|Q13618|Q13619|Q16531|Q9H0M0|A0AVT1|P61088|Q05086|…	http://www.genome.jp/kegg-bin/show_pathway?hsa04120/hsa:9063%09red/hsa:64682%09red/hsa:10273%09red/hsa:10277%09red/hsa:11060%09red/hsa:6500%09red/hsa:6923%09red/hsa:51366%09red/hsa:26232%09red/hsa:997%09red/hsa:331%09red/hsa:55284%09red/hsa:27339%09red/hsa:4281%09red/hsa:140739%09red/hsa:51465%09red/hsa:868%09red/hsa:10075%09red/hsa:84447%09red/hsa:26259%09red/hsa:867%09red/hsa:9817%09red/hsa:549…
Oxytocin signaling pathway	KEGG PATHWAY	hsa04921	68	239	0.0283169	0.0882533	Q9BZL4|Q02750|P16298|P54289|Q00722|P36507|P08754|Q01970|O43741|Q9Y698|O43306|Q02108|P05129|P17612|P05771|Q13131|P36873|P48544|P62140|P60660|O14974|Q9UQM7|O60237|Q08289|P63096|Q7Z3S7|P01100|P27361|P60709|Q14643|P61586|Q01668|Q16566|P13639|Q14012|P63098|O60266|P04899|P28482|P42338|P24844|P09471|Q15746|Q08209|P50148|Q9NQ66|P12931|Q13555|Q13554|P48454|Q13464|P14649|P28907|Q9NY47|O00459|Q8IZS8|P27986|…	http://www.genome.jp/kegg-bin/show_pathway?hsa04921/hsa:3708%09red/hsa:3709%09red/hsa:5604%09red/hsa:5582%09red/hsa:2982%09red/hsa:5534%09red/hsa:9254%09red/hsa:54776%09red/hsa:1938%09red/hsa:4660%09red/hsa:10398%09red/hsa:5332%09red/hsa:801%09red/hsa:4638%09red/hsa:140465%09red/hsa:2983%09red/hsa:4659%09red/hsa:5567%09red/hsa:5571%09red/hsa:93589%09red/hsa:783%09red/hsa:4637%09red/hsa:781%09red/…
mTOR signaling pathway	KEGG PATHWAY	hsa04150	67	217	0.0174041	0.0629065	P21281|P01112|P31749|P36507|O43156|P21283|P60484|P06730|Q02750|P05129|Q9UBS0|P05771|P55735|Q9UHA4|Q8TB45|Q92574|Q9Y2Q5|Q96EE3|P62753|Q15382|Q96B36|Q13131|O60573|Q9Y4R8|O14920|Q6PHR2|P61586|P27361|P06213|Q9NQL2|Q15418|Q9Y376|Q8NFG4|Q9NXC5|O95670|Q07889|P42338|Q6PJI9|P17252|P31751|P51812|P28482|P62993|Q9H9S4|O14641|Q6IAA8|Q16864|P30622|Q7RTN6|O00459|Q9UP38|O15530|P27986|Q96S15|P08195|Q8N122|Q14693|…	http://www.genome.jp/kegg-bin/show_pathway?hsa04150/hsa:528%09red/hsa:81929%09red/hsa:1975%09red/hsa:81617%09red/hsa:10000%09red/hsa:7248%09red/hsa:55004%09red/hsa:534%09red/hsa:9894%09red/hsa:7249%09red/hsa:5579%09red/hsa:1856%09red/hsa:5582%09red/hsa:6520%09red/hsa:51719%09red/hsa:5605%09red/hsa:1977%09red/hsa:92335%09red/hsa:5728%09red/hsa:8649%09red/hsa:5604%09red/hsa:201163%09red/hsa:9675%09…
Leukocyte transendothelial migration	KEGG PATHWAY	hsa04670	66	176	0.000683577	0.00455718	P13498|Q15759|P62834|Q9Y624|Q13017|P49023|P08754|Q13464|O14950|P15498|P05556|Q14289|P16885|P05129|O60716|P19320|P05771|P05107|P14209|P12814|P04839|P14780|P26038|Q96AP7|Q9NRY4|P63096|P50552|P61586|Q05397|P60709|P17252|P13612|Q15080|P04899|P61073|P61224|O95484|P53778|P42338|Q9BX67|P24844|Q96FS4|P26232|P19174|P60953|P16284|P15153|O15551|P05362|P35222|P35221|P33151|P55196|O00459|P57087|P27986|O75116|…	http://www.genome.jp/kegg-bin/show_pathway?hsa04670/hsa:1500%09red/hsa:58494%09red/hsa:5600%09red/hsa:5582%09red/hsa:3383%09red/hsa:9080%09red/hsa:11069%09red/hsa:83700%09red/hsa:7430%09red/hsa:2909%09red/hsa:5336%09red/hsa:7414%09red/hsa:2770%09red/hsa:10398%09red/hsa:2185%09red/hsa:5579%09red/hsa:5578%09red/hsa:5906%09red/hsa:5781%09red/hsa:50848%09red/hsa:4318%09red/hsa:5829%09red/hsa:4301%09r…
Sphingolipid signaling pathway	KEGG PATHWAY	hsa04071	66	184	0.00169032	0.00956783	Q15759|Q02750|P31749|Q00722|P27986|P08754|Q6ZMG9|Q04206|O95470|P60484|Q15147|P05129|P45984|P30153|P05771|P53779|Q66LE6|Q14344|P01112|P07339|P19838|P62714|P63096|P61586|P27361|P36507|O15270|P50148|P63151|P04899|P30273|P28482|P53778|Q9Y243|P42338|P17252|O60906|Q13362|P67775|P31751|P15153|Q01970|Q14738|P33527|Q13464|Q15173|Q15172|Q9NQ66|Q13510|O00459|O15530|Q12933|Q96G23|O75116|Q9BX95|Q16537|Q07812|…	http://www.genome.jp/kegg-bin/show_pathway?hsa04071/hsa:8560%09red/hsa:427%09red/hsa:5581%09red/hsa:5582%09red/hsa:23236%09red/hsa:29956%09red/hsa:10672%09red/hsa:10558%09red/hsa:81537%09red/hsa:2770%09red/hsa:5579%09red/hsa:5578%09red/hsa:55844%09red/hsa:5518%09red/hsa:1509%09red/hsa:5515%09red/hsa:2768%09red/hsa:5728%09red/hsa:5880%09red/hsa:5605%09red/hsa:5604%09red/hsa:5603%09red/hsa:5602%09r…
Neurotrophin signaling pathway	KEGG PATHWAY	hsa04722	64	200	0.0109052	0.0443374	Q15759|P62834|P31749|P36507|P46109|Q9Y4K3|Q07812|Q02750|P16885|Q9Y5V3|P45984|Q9ULH0|Q15418|Q15653|P53779|Q99523|P00519|Q9UQM7|O75582|Q05655|P19838|O14920|P61586|P27361|Q9NWZ3|P46108|P49810|Q16566|Q99819|P62993|P28482|P53778|Q07889|P42338|O14733|P19174|P60953|P31751|Q13557|P51812|Q13555|Q13554|Q9NRF2|Q04206|O43353|P49137|P61224|O00459|P52566|P27986|P52565|O15530|Q16539|P62158|P63000|P29353|Q06124|…	http://www.genome.jp/kegg-bin/show_pathway?hsa04722/hsa:3551%09red/hsa:5604%09red/hsa:5580%09red/hsa:5600%09red/hsa:5295%09red/hsa:572%09red/hsa:2885%09red/hsa:9252%09red/hsa:5595%09red/hsa:25970%09red/hsa:5594%09red/hsa:9500%09red/hsa:801%09red/hsa:7531%09red/hsa:10000%09red/hsa:5906%09red/hsa:5781%09red/hsa:1399%09red/hsa:1398%09red/hsa:5605%09red/hsa:6272%09red/hsa:5663%09red/hsa:7189%09red/hs…
Apoptosis	KEGG PATHWAY	hsa04210	63	208	0.0352066	0.101557	Q02750|P31749|P56202|P68363|Q13315|P98170|Q04206|Q71U36|Q07812|P17655|O00273|O43464|Q03252|P45984|Q9Y6K9|P09668|Q9UBR2|P68366|Q12923|Q9UKK3|P07339|P19838|Q13546|O14920|P01100|P27361|P60709|P36507|O95831|O75460|Q16611|Q9NR28|A6NHL2|P25774|P42338|Q14643|P27986|P31751|P09874|Q92934|Q9NY65|P07858|Q9UBX1|P20700|P07384|O00459|Q12933|P07711|P02545|O15530|P05198|P02549|P28482|Q14571|Q14573|P01112|P99999|…	http://www.genome.jp/kegg-bin/show_pathway?hsa04210/hsa:3708%09red/hsa:3709%09red/hsa:7277%09red/hsa:51807%09red/hsa:5295%09red/hsa:572%09red/hsa:6708%09red/hsa:142%09red/hsa:578%09red/hsa:5594%09red/hsa:5296%09red/hsa:6709%09red/hsa:56616%09red/hsa:331%09red/hsa:1676%09red/hsa:27429%09red/hsa:824%09red/hsa:1522%09red/hsa:5783%09red/hsa:4000%09red/hsa:4001%09red/hsa:1508%09red/hsa:1509%09red/hsa:…
Amoebiasis	KEGG PATHWAY	hsa05146	59	158	0.00137335	0.00840829	P51149|P51148|P02462|P30740|Q00722|P02461|P08311|Q04206|P01137|P78540|P55268|P35237|P07357|Q15147|P05129|O60603|P17612|P05771|P07358|P04792|P61020|P08572|P05107|P53420|Q01955|P12814|P24043|Q16363|P19838|Q14031|Q05397|O15230|Q01970|P02751|P05089|P08123|P42338|P17252|P02452|P50148|Q9NQ66|Q13753|P50453|Q16787|P18206|O00459|P25391|P20339|P27986|P11047|P11215|P22694|P07360|P29992|O43707|P08571|P07942|…	http://www.genome.jp/kegg-bin/show_pathway?hsa05146/hsa:3918%09red/hsa:5582%09red/hsa:3911%09red/hsa:3910%09red/hsa:3913%09red/hsa:3912%09red/hsa:3915%09red/hsa:23236%09red/hsa:1277%09red/hsa:1511%09red/hsa:5869%09red/hsa:5868%09red/hsa:7414%09red/hsa:929%09red/hsa:1278%09red/hsa:1992%09red/hsa:5579%09red/hsa:5578%09red/hsa:2767%09red/hsa:7097%09red/hsa:3315%09red/hsa:5747%09red/hsa:2335%09red/hs…
Thyroid hormone signaling pathway	KEGG PATHWAY	hsa04919	59	178	0.0108053	0.0443374	P19634|P31749|Q6P2C8|Q00722|Q15596|P05023|P36507|P42224|P05026|O75448|Q02750|P16885|Q15147|P05129|P54709|O60825|P17612|P05771|P05106|Q15382|O60244|P50993|P13637|P06756|Q13547|Q92769|P27361|Q01813|Q01970|P14415|Q8N3E9|P60709|P42338|P36021|P17252|Q96ST3|P10828|P19174|Q9NPJ6|P31751|P12931|Q92934|P35222|Q9NQ66|O00459|Q93074|P27986|O75376|O15530|P22694|P28482|P16615|P01112|P49841|P01116|Q9Y243|P11166|…	http://www.genome.jp/kegg-bin/show_pathway?hsa04919/hsa:5582%09red/hsa:5336%09red/hsa:10000%09red/hsa:5595%09red/hsa:9442%09red/hsa:10499%09red/hsa:481%09red/hsa:483%09red/hsa:482%09red/hsa:113026%09red/hsa:488%09red/hsa:5332%09red/hsa:5579%09red/hsa:5578%09red/hsa:29079%09red/hsa:572%09red/hsa:7249%09red/hsa:9282%09red/hsa:5605%09red/hsa:5604%09red/hsa:5214%09red/hsa:3690%09red/hsa:3066%09red/hs…
AMPK signaling pathway	KEGG PATHWAY	hsa04152	59	189	0.0266079	0.085832	Q15717|Q15907|P31749|P61006|O43741|Q14738|P61106|P49327|Q9UBS0|O60825|P61026|Q13131|Q16875|Q66LE6|O00767|P08237|Q15382|Q96B36|Q7RTN6|P62714|Q92574|P06213|P13639|P63151|Q9Y376|P30153|Q01813|P42338|Q8TCG5|P27986|P50416|P31751|P61019|P54619|Q9H9S4|P67775|Q92523|Q15173|Q15172|P35558|O00459|Q16537|Q13362|Q86SK9|O95822|Q8N122|O00757|P13807|Q16822|Q13085|Q96EB6|P09467|P16671|P17858|Q9Y243|Q15848|P49815|…	http://www.genome.jp/kegg-bin/show_pathway?hsa04152/hsa:10000%09red/hsa:9370%09red/hsa:948%09red/hsa:1375%09red/hsa:1374%09red/hsa:5105%09red/hsa:5106%09red/hsa:7248%09red/hsa:5862%09red/hsa:7249%09red/hsa:55844%09red/hsa:5213%09red/hsa:5518%09red/hsa:5571%09red/hsa:5516%09red/hsa:5515%09red/hsa:51719%09red/hsa:1938%09red/hsa:92335%09red/hsa:5211%09red/hsa:51552%09red/hsa:5214%09red/hsa:81617%09r…
ECM-receptor interaction	KEGG PATHWAY	hsa04512	56	122	2.97944e-05	0.000446916	P26006|P17301|P04275|P22105|P08514|O00468|P16070|P08572|Q08722|P55268|P02462|P07359|P05106|P53420|Q01955|P25391|P24043|P35442|P35443|Q14031|Q14118|P06756|P12111|P12110|P08648|Q9UQP3|O15230|P07996|P14770|Q7L1I2|Q13683|P13612|P02751|P23229|P31431|P18084|P08123|P02458|P16144|P98160|P02452|P13224|Q13753|P16671|Q16787|P56199|P24821|P11047|P05556|P04004|Q92752|Q16363|Q13797|P07942|Q7L0J3|P12109	http://www.genome.jp/kegg-bin/show_pathway?hsa04512/hsa:3918%09red/hsa:63923%09red/hsa:3911%09red/hsa:3910%09red/hsa:3913%09red/hsa:3912%09red/hsa:3915%09red/hsa:1277%09red/hsa:1282%09red/hsa:1293%09red/hsa:2335%09red/hsa:1278%09red/hsa:7450%09red/hsa:9899%09red/hsa:1291%09red/hsa:1292%09red/hsa:6385%09red/hsa:3371%09red/hsa:3339%09red/hsa:960%09red/hsa:961%09red/hsa:7057%09red/hsa:3693%09red/hsa…
AGE-RAGE signaling pathway in diabetic complications	KEGG PATHWAY	hsa04933	56	163	0.00730034	0.0342203	Q15759|P31749|Q00722|P02461|P42224|Q04206|P01137|P63000|Q07812|P08572|Q15147|P19320|P45984|P02462|P05771|P11802|P08123|P53779|P53420|Q01955|P05362|P04839|Q15796|Q05655|P19838|Q14031|P27361|Q01970|P02751|Q8N3E9|P53778|Q9Y243|P42338|P40763|P17252|P19174|P60953|P02452|P51692|Q13485|Q9NQ66|P31751|O60610|O00459|P27986|P13726|Q16539|P28482|P07204|Q02156|P01112|P01116|P29474|P16885|P42574|O15264	http://www.genome.jp/kegg-bin/show_pathway?hsa04933/hsa:5580%09red/hsa:5581%09red/hsa:5295%09red/hsa:3383%09red/hsa:5595%09red/hsa:1277%09red/hsa:1019%09red/hsa:1729%09red/hsa:6774%09red/hsa:113026%09red/hsa:1278%09red/hsa:5579%09red/hsa:5578%09red/hsa:10000%09red/hsa:2335%09red/hsa:23236%09red/hsa:1285%09red/hsa:7056%09red/hsa:5603%09red/hsa:7412%09red/hsa:5601%09red/hsa:4089%09red/hsa:4087%09re…
Bacterial invasion of epithelial cells	KEGG PATHWAY	hsa05100	55	125	5.01824e-05	0.000612918	Q92599|Q92556|P46108|P49023|P51636|P61586|Q9BPX5|P05556|Q96BJ8|Q9UH03|Q13418|Q05193|P12830|Q96JJ3|P22681|P29353|P84095|Q13191|P09497|P08648|Q05397|Q92747|P46109|Q14247|P50570|P02751|Q9UHD8|Q00610|P60709|P42338|Q9Y6W5|P26232|Q14141|P60953|P12931|Q9UQ16|Q14185|P35221|P59998|P18206|P09496|O00459|P63000|Q15019|P27986|P14317|Q9NVA2|O15511|O00401|A1A4S6|Q9Y5K6|O15143|O15144|O15145|P35222|Q03135	http://www.genome.jp/kegg-bin/show_pathway?hsa05100/hsa:79767%09red/hsa:10109%09red/hsa:8976%09red/hsa:1211%09red/hsa:1212%09red/hsa:1213%09red/hsa:10552%09red/hsa:23607%09red/hsa:7414%09red/hsa:10092%09red/hsa:10801%09red/hsa:868%09red/hsa:5296%09red/hsa:10163%09red/hsa:55964%09red/hsa:1399%09red/hsa:10094%09red/hsa:5829%09red/hsa:867%09red/hsa:5747%09red/hsa:10093%09red/hsa:1785%09red/hsa:4735%…
HIF-1 signaling pathway	KEGG PATHWAY	hsa04066	55	170	0.0191279	0.0683138	P09601|Q02750|P31749|P36507|Q9GZT9|Q04206|Q15389|P06733|P19367|P16885|P05129|Q9UBS0|P08559|P05771|Q16875|P00338|P04839|P15260|P62753|Q9UQM7|Q15369|P04406|O60573|P19838|P06730|P00558|P09104|Q2TB90|P27361|P06213|P11177|P28482|Q9Y243|P42338|P40763|P17252|P19174|P31751|Q13557|Q13555|Q13554|O00459|P02787|P02786|P27986|P13929|Q15118|Q15370|Q13617|P17858|P29474|P11166|P01033|P04075|P42345	http://www.genome.jp/kegg-bin/show_pathway?hsa04066/hsa:5582%09red/hsa:80201%09red/hsa:10000%09red/hsa:5595%09red/hsa:5594%09red/hsa:54583%09red/hsa:3939%09red/hsa:5579%09red/hsa:2023%09red/hsa:2026%09red/hsa:3459%09red/hsa:3098%09red/hsa:7076%09red/hsa:2027%09red/hsa:1977%09red/hsa:7018%09red/hsa:5211%09red/hsa:5605%09red/hsa:5604%09red/hsa:5230%09red/hsa:284%09red/hsa:7037%09red/hsa:8453%09red/…
Biosynthesis of amino acids	KEGG PATHWAY	hsa01230	54	122	5.10765e-05	0.000612918	Q96GA7|O43175|O15382|Q03154|P34896|P34897|P21399|P31153|P78540|P06733|Q99707|P00505|P18669|P00966|P54886|P05062|P05089|P00439|P60174|P48735|P14618|P04406|P15104|P04075|P30613|P04424|P00558|Q01813|P11908|P51553|Q96AT9|Q99798|Q96C36|P08237|Q00266|P09104|O75390|Q8TD30|Q9NZL9|P60891|P29401|P50213|P17174|P11498|P13929|P32322|P07205|P37837|P49419|P17858|P54687|P09972|O43837|Q9Y617|O75874	http://www.genome.jp/kegg-bin/show_pathway?hsa01230/hsa:230%09red/hsa:84706%09red/hsa:226%09red/hsa:5634%09red/hsa:383%09red/hsa:445%09red/hsa:27430%09red/hsa:4143%09red/hsa:2805%09red/hsa:2806%09red/hsa:2026%09red/hsa:2027%09red/hsa:4144%09red/hsa:48%09red/hsa:5211%09red/hsa:5213%09red/hsa:5214%09red/hsa:2023%09red/hsa:5230%09red/hsa:7167%09red/hsa:5315%09red/hsa:5053%09red/hsa:6470%09red/hsa:53…
mRNA surveillance pathway	KEGG PATHWAY	hsa03015	54	124	0.000120186	0.00106047	Q16630|Q96EP5|Q09161|Q13838|Q9UBU9|Q9UKV3|Q14738|Q9H307|O43148|P30153|Q6UXN9|P52298|P11940|O43347|Q10570|Q92900|O00422|Q13310|Q9BRX2|P62714|P36873|O95639|Q86V81|Q9P2I0|Q86U42|Q9H0L4|P63151|P51003|Q66LE6|Q9C0J8|Q96DH6|Q8IYB3|P67775|Q9BRP8|P38919|P62140|Q05048|Q86US8|Q9UKF6|Q15172|O60942|P15170|Q13362|Q16537|Q9Y5S9|Q92797|Q8N684|Q15173|P62136|Q12996|Q9Y450|O43809|P62495|Q96A72	http://www.genome.jp/kegg-bin/show_pathway?hsa03015/hsa:26528%09red/hsa:10250%09red/hsa:51692%09red/hsa:4686%09red/hsa:22916%09red/hsa:53981%09red/hsa:7919%09red/hsa:2107%09red/hsa:5411%09red/hsa:9939%09red/hsa:55844%09red/hsa:5518%09red/hsa:5516%09red/hsa:5515%09red/hsa:124540%09red/hsa:29894%09red/hsa:5499%09red/hsa:53918%09red/hsa:22985%09red/hsa:55339%09red/hsa:23283%09red/hsa:84305%09red/hsa…
Fc gamma R-mediated phagocytosis	KEGG PATHWAY	hsa04666	54	144	0.00197839	0.0105519	Q02750|P31749|P31751|Q13153|O43150|P15498|P08575|P16885|Q9UPY6|P05129|Q9UBS0|Q9ULH1|P05771|P07948|P59998|Q05655|P06396|P43405|P50552|P27361|Q92747|Q9Y6W5|P46109|P46108|P50570|O15357|Q9Y6U3|P28482|P42338|P17252|P19174|P60953|P12318|Q9Y281|O00499|O00401|O60733|P23528|Q9BPX5|O00459|P27986|P15153|P62330|Q99755|P63000|O15511|Q02156|O15143|O15144|O15145|Q9Y243|P49418|O14495|O60331	http://www.genome.jp/kegg-bin/show_pathway?hsa04666/hsa:8394%09red/hsa:5580%09red/hsa:5581%09red/hsa:5582%09red/hsa:5595%09red/hsa:8398%09red/hsa:10552%09red/hsa:10093%09red/hsa:6850%09red/hsa:274%09red/hsa:10092%09red/hsa:273%09red/hsa:10163%09red/hsa:5579%09red/hsa:5578%09red/hsa:4067%09red/hsa:10109%09red/hsa:10810%09red/hsa:1399%09red/hsa:10094%09red/hsa:8853%09red/hsa:1073%09red/hsa:5058%09r…
Glucagon signaling pathway	KEGG PATHWAY	hsa04922	54	163	0.0102854	0.0434593	P31749|Q00722|Q13085|P15735|O43741|P06737|P18669|P08559|P50148|P17612|Q14573|Q13131|Q9UQM7|P00338|Q6IN85|Q01970|P63098|Q93100|P16298|Q99873|Q08209|Q14643|Q8TCG5|P11177|P50416|P31751|Q13557|Q13555|Q13554|P46020|Q92523|P11166|P48454|P35557|Q9NQ66|P35558|Q9H0K1|P14618|P11217|P11216|P13807|Q16822|P22694|P62158|Q14571|P60510|Q96EB6|P09467|P54619|P17858|Q9Y243|Q6ZMR3|P07195|P46019|Q15147	http://www.genome.jp/kegg-bin/show_pathway?hsa04922/hsa:3708%09red/hsa:3709%09red/hsa:10000%09red/hsa:1375%09red/hsa:1374%09red/hsa:5105%09red/hsa:5106%09red/hsa:55671%09red/hsa:3939%09red/hsa:5332%09red/hsa:801%09red/hsa:5534%09red/hsa:5531%09red/hsa:5530%09red/hsa:5533%09red/hsa:5532%09red/hsa:5571%09red/hsa:5255%09red/hsa:5256%09red/hsa:5257%09red/hsa:3945%09red/hsa:5211%09red/hsa:3276%09red/h…
Insulin resistance	KEGG PATHWAY	hsa04931	53	157	0.0115071	0.0458795	P31749|O14975|O43741|Q04206|Q6P1M0|P45984|P06737|Q9UBS0|P05771|Q13131|P36873|O14920|P53779|Q06124|Q06210|P62140|P18031|Q15257|Q15418|Q05655|O15294|P19838|Q9Y2P4|Q9H7J1|P06213|Q6PCB7|P10586|Q9Y243|P42338|P40763|P27986|P50416|P31751|P51812|P54619|Q92523|P35558|O00459|P60484|O60502|O15530|P11217|P11216|P13807|Q16822|Q5K4L6|Q02156|P62136|P16671|P49841|P29474|P11166|P42345	http://www.genome.jp/kegg-bin/show_pathway?hsa04931/hsa:5580%09red/hsa:5581%09red/hsa:10000%09red/hsa:2673%09red/hsa:376497%09red/hsa:1375%09red/hsa:1374%09red/hsa:5105%09red/hsa:5106%09red/hsa:11001%09red/hsa:90673%09red/hsa:5579%09red/hsa:5792%09red/hsa:5781%09red/hsa:5571%09red/hsa:5524%09red/hsa:948%09red/hsa:5728%09red/hsa:5499%09red/hsa:5602%09red/hsa:5601%09red/hsa:6197%09red/hsa:5170%09re…
Complement and coagulation cascades	KEGG PATHWAY	hsa04610	52	108	1.17656e-05	0.000207628	P00488|P04275|P03952|P10909|P07357|P04004|P08697|P07358|P08174|P05107|P01042|P01023|P20851|Q96IY4|P00747|P02671|P00746|P01009|P01008|P02675|P00742|P08709|P02679|P12259|P00740|P0C0L5|P0C0L4|P08603|P05155|P05154|P13671|P01024|P07225|P21730|P20702|P09871|P10643|P00734|P00736|P06681|P11215|P13726|P04003|P07360|P07204|P05546|P02747|P02746|P00750|P00751|P13987|P01031|P02748	http://www.genome.jp/kegg-bin/show_pathway?hsa04610/hsa:5327%09red/hsa:3818%09red/hsa:5345%09red/hsa:5104%09red/hsa:1191%09red/hsa:629%09red/hsa:728%09red/hsa:2244%09red/hsa:2%09red/hsa:725%09red/hsa:727%09red/hsa:713%09red/hsa:722%09red/hsa:1675%09red/hsa:7450%09red/hsa:2159%09red/hsa:966%09red/hsa:715%09red/hsa:5627%09red/hsa:2147%09red/hsa:721%09red/hsa:2162%09red/hsa:7056%09red/hsa:717%09red/…
Salmonella infection	KEGG PATHWAY	hsa05132	52	132	0.0010151	0.00648251	P51149|Q15759|Q7Z406|P35580|Q07157|Q9BPX5|Q9NSK0|O15511|P08571|P45984|P53779|P29466|P15260|O43237|P21333|P35080|Q8IWE5|P19838|O00401|O75369|P01100|P27361|Q92747|Q9Y6W5|Q9Y6G9|P28482|P53778|P60709|P59998|P18428|Q8NCM8|Q9H0B6|P60953|Q04206|P35579|Q13464|P84095|Q07866|O75116|Q14204|O14576|Q14315|Q16539|Q13409|P63000|Q16512|Q16513|O15143|O15144|O15145|O15264|P07737	http://www.genome.jp/kegg-bin/show_pathway?hsa05132/hsa:5585%09red/hsa:5586%09red/hsa:3831%09red/hsa:5600%09red/hsa:10109%09red/hsa:8976%09red/hsa:10552%09red/hsa:51143%09red/hsa:10163%09red/hsa:929%09red/hsa:3459%09red/hsa:10095%09red/hsa:10094%09red/hsa:1780%09red/hsa:1781%09red/hsa:7879%09red/hsa:10093%09red/hsa:10092%09red/hsa:2316%09red/hsa:2317%09red/hsa:5603%09red/hsa:5602%09red/hsa:5601%0…
Retrograde endocannabinoid signaling	KEGG PATHWAY	hsa04723	51	151	0.012879	0.0492539	Q15759|Q9HAV0|Q00722|P62873|P53779|P62879|P17252|P16520|O43306|Q15147|P05129|P45984|P17612|P05771|P48544|Q99685|P59768|Q9H598|P48058|P63096|O95622|P27361|Q8NCG7|Q14643|P63218|Q01668|O60262|P08754|P63215|P04899|P28482|P53778|P18507|P09471|P50148|Q9NQ66|Q9UBI6|P42261|Q01970|O14775|Q9P2U7|P22694|Q9P2U8|Q16539|O00519|Q14571|Q14573|Q9BV23|O60266|O15264|P42262	http://www.genome.jp/kegg-bin/show_pathway?hsa04723/hsa:3708%09red/hsa:3709%09red/hsa:59345%09red/hsa:5600%09red/hsa:5582%09red/hsa:57084%09red/hsa:54331%09red/hsa:221955%09red/hsa:5594%09red/hsa:2787%09red/hsa:5332%09red/hsa:5579%09red/hsa:5578%09red/hsa:140679%09red/hsa:5567%09red/hsa:23236%09red/hsa:5603%09red/hsa:2166%09red/hsa:5601%09red/hsa:11343%09red/hsa:10681%09red/hsa:6300%09red/hsa:560…
Peroxisome	KEGG PATHWAY	hsa04146	50	116	0.00015211	0.0013038	P40855|P33897|O95573|Q13011|A8MXV4|O14832|O14975|Q9NYQ3|O75521|Q15067|Q9Y2Q3|P04179|P22307|P28288|Q9NUI1|Q9UHK6|Q99424|Q03426|P48735|Q15126|O96011|P35914|Q8WVX9|Q9UKU0|O43808|P43155|O15254|Q06830|P09110|Q9BY49|O00116|O60488|P51659|O75381|Q8IYB4|Q9Y5Y5|P56589|P30044|Q9UJ83|Q08426|P34913|O95822|P04040|Q9BQG2|P50542|O43933|O75874|P33121|Q9ULC5|O15228|P00441	http://www.genome.jp/kegg-bin/show_pathway?hsa04146/hsa:3295%09red/hsa:8799%09red/hsa:4598%09red/hsa:8540%09red/hsa:10654%09red/hsa:847%09red/hsa:8504%09red/hsa:25824%09red/hsa:6647%09red/hsa:55825%09red/hsa:9409%09red/hsa:6648%09red/hsa:215%09red/hsa:8310%09red/hsa:26063%09red/hsa:26061%09red/hsa:5825%09red/hsa:5824%09red/hsa:84188%09red/hsa:6342%09red/hsa:5195%09red/hsa:3417%09red/hsa:3418%09re…
Phosphatidylinositol signaling system	KEGG PATHWAY	hsa04070	50	153	0.0214449	0.0731076	O43426|Q00722|Q13614|Q96PE3|Q14571|O14735|Q8TBX8|P16885|Q15147|P05129|P60484|P05771|Q13572|Q92903|O95674|P49441|P29218|P48426|Q5KSL6|Q8NEB9|P17252|P42356|Q86T03|Q9Y217|O15357|Q8N3E9|Q9Y2I7|P42338|Q14642|Q14643|P78356|P19174|P52429|Q9BTU6|P23743|Q01970|Q9NQ66|O00459|Q9NX62|P27986|Q13574|Q99755|Q13613|P62158|Q13615|Q14573|Q01968|Q9UBF8|Q9BT40|O60331	http://www.genome.jp/kegg-bin/show_pathway?hsa04070/hsa:200576%09red/hsa:3709%09red/hsa:8394%09red/hsa:3628%09red/hsa:5582%09red/hsa:5336%09red/hsa:5289%09red/hsa:79837%09red/hsa:23236%09red/hsa:113026%09red/hsa:801%09red/hsa:54928%09red/hsa:3708%09red/hsa:8776%09red/hsa:8396%09red/hsa:5728%09red/hsa:8898%09red/hsa:3631%09red/hsa:8897%09red/hsa:10423%09red/hsa:4952%09red/hsa:5298%09red/hsa:5579%0…
Glycolysis / Gluconeogenesis	KEGG PATHWAY	hsa00010	49	104	5.47498e-05	0.000631729	P05062|P30613|P51648|P06733|Q96G03|P30837|P18669|P08559|P09622|P36871|Q9NUB1|P60174|P14618|P04406|P49189|P04075|P10515|P00338|P00558|Q2TB90|P40394|P11177|P14550|P43353|Q96C23|Q01813|P08237|P09104|P28332|P11766|P35557|Q9UNW1|P35558|P00326|P13929|O00757|Q16822|P05091|P07205|P19367|P49419|P09467|P07738|P06744|P17858|P09972|Q6ZMR3|Q9NR19|P07195	http://www.genome.jp/kegg-bin/show_pathway?hsa00010/hsa:230%09red/hsa:669%09red/hsa:9562%09red/hsa:5105%09red/hsa:5106%09red/hsa:219%09red/hsa:55902%09red/hsa:84532%09red/hsa:3939%09red/hsa:2821%09red/hsa:217%09red/hsa:2023%09red/hsa:2026%09red/hsa:2027%09red/hsa:80201%09red/hsa:5236%09red/hsa:5211%09red/hsa:128%09red/hsa:5213%09red/hsa:5214%09red/hsa:5230%09red/hsa:7167%09red/hsa:55276%09red/hsa…
Gap junction	KEGG PATHWAY	hsa04540	49	131	0.00322105	0.0161052	O95622|P68363|P36507|P08754|Q07157|Q71U36|Q9H4B7|O43306|Q13885|Q13509|P05129|P17612|P05771|P04350|Q9GZP0|P68366|P62993|Q00722|P07437|Q13237|Q02108|P63096|P27361|P17252|Q01970|Q9BUF5|O60266|P04899|P28482|A6NHL2|Q07889|P68371|Q14643|P09619|P50148|Q9NQ66|P12931|Q9NY65|Q9BVA1|P22694|Q02153|P29992|Q02750|Q14571|Q14573|P01112|P01116|Q13976|Q15147	http://www.genome.jp/kegg-bin/show_pathway?hsa04540/hsa:3708%09red/hsa:3709%09red/hsa:3845%09red/hsa:2983%09red/hsa:2982%09red/hsa:2885%09red/hsa:10382%09red/hsa:23236%09red/hsa:5592%09red/hsa:5579%09red/hsa:5578%09red/hsa:2767%09red/hsa:5582%09red/hsa:5567%09red/hsa:5605%09red/hsa:5604%09red/hsa:109%09red/hsa:7280%09red/hsa:5595%09red/hsa:5594%09red/hsa:5593%09red/hsa:5332%09red/hsa:5331%09red/h…
Shigellosis	KEGG PATHWAY	hsa05131	48	104	9.5622e-05	0.000925374	Q92556|P46108|Q15759|Q9BPX5|P16070|Q96BJ8|P45984|Q9Y6K9|Q15653|P53779|Q96JJ3|P00519|Q01081|P84095|P35080|P19838|O00401|P08648|P27361|Q92747|P46109|Q14247|P28482|Q9UKB1|P53778|P60709|P59998|Q9Y6W5|P60953|Q04206|P12931|Q14185|Q13464|O43353|P18206|O60610|O14920|O75116|P05556|P14317|Q16539|P63000|O15511|O15143|O15144|O15145|O15264|P07737	http://www.genome.jp/kegg-bin/show_pathway?hsa05131/hsa:79767%09red/hsa:5217%09red/hsa:10109%09red/hsa:10552%09red/hsa:5594%09red/hsa:1729%09red/hsa:10093%09red/hsa:7414%09red/hsa:63916%09red/hsa:10163%09red/hsa:25%09red/hsa:1399%09red/hsa:10094%09red/hsa:960%09red/hsa:10092%09red/hsa:5603%09red/hsa:5602%09red/hsa:5601%09red/hsa:7307%09red/hsa:6300%09red/hsa:60%09red/hsa:3551%09red/hsa:5595%09red…
Pyrimidine metabolism	KEGG PATHWAY	hsa00240	48	147	0.00871637	0.0378973	Q8TCD5|Q9Y2S0|Q9BY32|P21589|Q9GZM3|Q7LG56|Q9Y5B8|P50583|P36954|P30876|P32321|P52434|O75414|P19971|P27707|Q02127|Q13232|Q96BW1|P27708|Q12882|P11172|P23919|Q14117|Q9NWZ5|P30085|P33316|P24928|Q9NNW7|Q9HA47|Q9H9Y6|Q16881|O00142|Q8WVQ1|P09884|P00491|P22392|Q9NRF8|P17812|Q9H0P0|O75356|P32320|Q8TCS8|Q9BUI4|P62487|Q9NW08|P49902|P19388|P23921|P49961|Q5EBM0|P15531	http://www.genome.jp/kegg-bin/show_pathway?hsa00240/hsa:4907%09red/hsa:1635%09red/hsa:4860%09red/hsa:30833%09red/hsa:7296%09red/hsa:50484%09red/hsa:3704%09red/hsa:318%09red/hsa:1633%09red/hsa:55703%09red/hsa:1723%09red/hsa:56474%09red/hsa:83549%09red/hsa:1503%09red/hsa:5438%09red/hsa:87178%09red/hsa:54963%09red/hsa:5434%09red/hsa:5436%09red/hsa:5437%09red/hsa:5430%09red/hsa:5431%09red/hsa:1854%09…
Choline metabolism in cancer	KEGG PATHWAY	hsa05231	48	149	0.0285352	0.0882533	Q02750|P31749|P36507|P53779|P05129|Q53GD3|P45984|Q8IWA5|Q9UBS0|P05771|Q92574|Q9GZP0|P62993|Q15382|O00401|Q8WWI5|P01100|P27361|Q9Y6W5|Q5KSL6|P49815|P28482|Q07889|P42338|P17252|P19174|P09619|P52429|P31751|P23743|Q9NPB8|P15153|O00459|P49585|P27986|O15530|O75608|Q13574|Q99755|P63000|Q9UPY6|P01112|Q9Y5K3|P01116|Q9Y243|O14495|O60331|P42345	http://www.genome.jp/kegg-bin/show_pathway?hsa05231/hsa:8394%09red/hsa:10434%09red/hsa:5582%09red/hsa:2885%09red/hsa:5595%09red/hsa:80736%09red/hsa:56261%09red/hsa:23446%09red/hsa:9468%09red/hsa:5579%09red/hsa:5578%09red/hsa:10163%09red/hsa:7249%09red/hsa:7248%09red/hsa:5880%09red/hsa:5605%09red/hsa:5604%09red/hsa:5602%09red/hsa:5601%09red/hsa:2353%09red/hsa:5170%09red/hsa:5130%09red/hsa:5335%09r…
RNA degradation	KEGG PATHWAY	hsa03018	47	102	0.00011577	0.00105246	Q6PGP7|P10809|Q9NPI6|P06733|P42285|Q9NQT5|Q01780|Q9Y2L1|P11940|A5YKK6|Q15477|P08237|Q9H9A5|Q96DE0|Q6P2E9|Q58A45|Q13310|Q96C86|Q9UK45|Q9NZN8|O95453|P26196|Q96F86|Q13868|Q9H2U1|Q8IZH2|Q92600|Q9Y333|Q9H0D6|P09104|Q8IZD4|Q9GZS3|P13929|Q9NPD3|P38646|Q06265|Q96B26|Q8TCS8|P62312|P62310|Q01813|Q9Y4Z0|O95777|P17858|Q15024|Q9UIV1|Q5RKV6	http://www.genome.jp/kegg-bin/show_pathway?hsa03018/hsa:87178%09red/hsa:51690%09red/hsa:51691%09red/hsa:23644%09red/hsa:25804%09red/hsa:55802%09red/hsa:5394%09red/hsa:1656%09red/hsa:23404%09red/hsa:2027%09red/hsa:5393%09red/hsa:25904%09red/hsa:3313%09red/hsa:27258%09red/hsa:5211%09red/hsa:5213%09red/hsa:5214%09red/hsa:2023%09red/hsa:196513%09red/hsa:80153%09red/hsa:23019%09red/hsa:9652%09red/hsa:…
Cardiac muscle contraction	KEGG PATHWAY	hsa04260	47	106	0.000231899	0.00183078	P19634|P32418|P05023|P05026|Q9Y698|P08574|P14927|P14854|P54709|P09669|O14548|P50993|P06753|P24310|P24311|Q08289|Q7Z3S7|P13637|P14415|Q92581|P00156|Q01668|Q9UDW1|P68032|O14949|P00395|Q96KJ9|P10606|P15954|P07919|P47985|P07951|P09493|Q9NY47|P10176|P12883|P00403|Q8IZS8|P67936|P22695|P12829|P54289|P16615|P13073|P20674|P31930|P14406	http://www.genome.jp/kegg-bin/show_pathway?hsa04260/hsa:9377%09red/hsa:9167%09red/hsa:1351%09red/hsa:1350%09red/hsa:93589%09red/hsa:1327%09red/hsa:9254%09red/hsa:481%09red/hsa:84701%09red/hsa:483%09red/hsa:482%09red/hsa:29796%09red/hsa:488%09red/hsa:776%09red/hsa:4635%09red/hsa:783%09red/hsa:781%09red/hsa:7170%09red/hsa:6546%09red/hsa:7168%09red/hsa:7169%09red/hsa:7388%09red/hsa:1340%09red/hsa:13…
ErbB signaling pathway	KEGG PATHWAY	hsa04012	46	141	0.0269946	0.086153	Q02750|P31749|Q13177|Q13153|O75914|O14733|P16333|P45984|P16885|P05129|Q9UBS0|P45985|P05771|P53779|P62993|P22681|Q9UQM7|P29353|Q13191|P27361|P36507|P46109|P46108|Q05397|P28482|O43639|Q07889|P42338|P17252|P19174|P31751|P12931|Q92934|Q13555|Q13554|P51692|O00459|P00519|Q13557|P27986|P10398|P01112|P49841|P01116|Q9Y243|P42345	http://www.genome.jp/kegg-bin/show_pathway?hsa04012/hsa:5063%09red/hsa:5062%09red/hsa:5582%09red/hsa:572%09red/hsa:2885%09red/hsa:5595%09red/hsa:5579%09red/hsa:5578%09red/hsa:868%09red/hsa:10000%09red/hsa:25%09red/hsa:1399%09red/hsa:1398%09red/hsa:867%09red/hsa:5747%09red/hsa:5058%09red/hsa:5604%09red/hsa:5602%09red/hsa:5601%09red/hsa:6464%09red/hsa:5609%09red/hsa:5336%09red/hsa:5335%09red/hsa:55…
Small cell lung cancer	KEGG PATHWAY	hsa05222	46	136	0.0330533	0.0972156	P26006|P17301|Q13114|P31749|P98170|Q9Y4K3|P06400|P60484|P99999|P07942|P55268|Q9Y6K9|P11802|O96020|P53420|Q01955|P25391|P24043|Q16363|P19838|P06756|O14920|P08514|Q14031|Q05397|O15230|P02751|O75928|P23229|P42338|Q00534|P31751|Q13753|Q16787|Q04206|O00459|P02462|Q12933|P27986|P11047|P05556|Q9Y243|P08572|P49789	http://www.genome.jp/kegg-bin/show_pathway?hsa05222/hsa:9063%09red/hsa:3918%09red/hsa:10000%09red/hsa:3911%09red/hsa:3910%09red/hsa:3913%09red/hsa:3912%09red/hsa:3915%09red/hsa:1019%09red/hsa:331%09red/hsa:5925%09red/hsa:5747%09red/hsa:2335%09red/hsa:5728%09red/hsa:9134%09red/hsa:7189%09red/hsa:2272%09red/hsa:54205%09red/hsa:7186%09red/hsa:7187%09red/hsa:3655%09red/hsa:3674%09red/hsa:3675%09red/h…
Ribosome biogenesis in eukaryotes	KEGG PATHWAY	hsa03008	45	94	8.09503e-05	0.000837417	O75818|P78346|P56537|Q9UBU9|Q9UNX4|Q15061|Q8IWA0|O00567|Q9BVJ6|Q12788|Q9NPE3|Q9Y3D8|Q96G21|Q9NU22|Q9NYH9|Q8TED0|Q9Y3B8|Q9Y2X3|Q9NV31|Q9NW13|Q8IZH2|P22087|Q9H0D6|P55769|Q9Y5J1|Q8NB90|Q8NI36|Q9Y2P8|O60832|Q9H6R4|Q15269|Q8NEV1|P62826|P67870|Q9H583|Q7Z2Z2|P19784|Q9NX24|O14980|Q9H0A0|Q9BVP2|Q9BRS2|Q9BZE4|Q9Y3A5|Q92979	http://www.genome.jp/kegg-bin/show_pathway?hsa03008/hsa:10436%09red/hsa:10482%09red/hsa:2091%09red/hsa:4809%09red/hsa:55651%09red/hsa:10799%09red/hsa:51602%09red/hsa:84128%09red/hsa:55127%09red/hsa:10556%09red/hsa:23160%09red/hsa:25996%09red/hsa:23560%09red/hsa:7514%09red/hsa:1460%09red/hsa:5901%09red/hsa:26354%09red/hsa:5822%09red/hsa:83732%09red/hsa:55226%09red/hsa:55813%09red/hsa:10885%09red/h…
Valine, leucine and isoleucine degradation	KEGG PATHWAY	hsa00280	42	75	8.6582e-06	0.000162341	Q02252|P40939|P05166|Q86V21|P05165|O15382|P09110|P51648|Q9BWD1|Q16836|P55084|Q4G176|P09622|P16219|Q6NVY1|P35914|Q13825|P49189|P30837|Q9UKU7|P24752|Q01581|P42765|Q9HCC0|Q96PE7|P30084|P11182|P80404|P21953|Q99714|P12694|P22033|Q08426|P55809|P05091|P11310|P49419|P31937|P54687|Q96RQ3|P45954|P26440	http://www.genome.jp/kegg-bin/show_pathway?hsa00280/hsa:594%09red/hsa:593%09red/hsa:219%09red/hsa:27034%09red/hsa:3032%09red/hsa:26275%09red/hsa:217%09red/hsa:64087%09red/hsa:3028%09red/hsa:5096%09red/hsa:11112%09red/hsa:5095%09red/hsa:10449%09red/hsa:1892%09red/hsa:56922%09red/hsa:65985%09red/hsa:4329%09red/hsa:224%09red/hsa:197322%09red/hsa:223%09red/hsa:5019%09red/hsa:3712%09red/hsa:586%09red/…
Pathogenic Escherichia coli infection	KEGG PATHWAY	hsa05130	42	84	6.53035e-05	0.00069968	P68366|P68363|Q9BPX5|P16333|P05556|Q13885|Q13509|P08571|P04350|P12830|P00519|P07437|O00401|P61586|P60709|Q14247|Q9BUF5|P05783|P27348|A6NHL2|O43639|Q92747|P59998|P68371|P17252|P60953|P19338|P35222|Q13464|Q71U36|P63104|Q9BVA1|O75116|Q9H4B7|P14317|O15511|P15311|Q92974|O15143|O15144|O15145|Q9NY65	http://www.genome.jp/kegg-bin/show_pathway?hsa05130/hsa:51807%09red/hsa:10109%09red/hsa:25%09red/hsa:7430%09red/hsa:3875%09red/hsa:9181%09red/hsa:929%09red/hsa:5578%09red/hsa:81027%09red/hsa:7534%09red/hsa:10095%09red/hsa:10094%09red/hsa:10093%09red/hsa:10092%09red/hsa:999%09red/hsa:60%09red/hsa:7280%09red/hsa:998%09red/hsa:81873%09red/hsa:203068%09red/hsa:6093%09red/hsa:4691%09red/hsa:4690%09red…
Epithelial cell signaling in Helicobacter pylori infection	KEGG PATHWAY	hsa05120	42	103	0.00176071	0.00962783	Q15904|Q15759|P41240|Q13153|Q07157|P63000|P61421|P16885|P45985|P45984|Q9Y6K9|P07948|Q9Y487|Q9Y624|Q93050|O95670|P13501|O14672|P19838|Q9Y2X7|P21281|P21283|P53778|P53779|Q9BX67|P19174|P60953|Q04206|P12931|Q13488|Q16864|O14920|P57087|P27449|Q16539|P38606|Q9UI12|Q06124|P36543|P42574|O15264|Q9Y5K8	http://www.genome.jp/kegg-bin/show_pathway?hsa05120/hsa:58494%09red/hsa:1445%09red/hsa:526%09red/hsa:535%09red/hsa:534%09red/hsa:537%09red/hsa:4067%09red/hsa:23545%09red/hsa:5781%09red/hsa:5058%09red/hsa:102%09red/hsa:5603%09red/hsa:5602%09red/hsa:5601%09red/hsa:5600%09red/hsa:51382%09red/hsa:6300%09red/hsa:28964%09red/hsa:3551%09red/hsa:5336%09red/hsa:5335%09red/hsa:8517%09red/hsa:998%09red/hsa:…
PPAR signaling pathway	KEGG PATHWAY	hsa03320	42	118	0.0116228	0.0458795	O95573|O14975|P09110|P02647|O15540|Q15067|P07108|O15254|O00767|P05413|Q9BX66|Q6P1M0|Q13418|P55058|Q9UKU0|Q6PCB7|P22307|Q99424|O60488|Q8TCG5|P02652|P28330|P02656|Q00G26|P16671|P50416|Q92523|Q01469|Q02318|P35558|Q9Y2P4|O15530|Q86SK9|Q08426|P48163|Q16822|P11310|O95864|P23786|P33121|Q15848|Q9ULC5	http://www.genome.jp/kegg-bin/show_pathway?hsa03320/hsa:9370%09red/hsa:5360%09red/hsa:1376%09red/hsa:1375%09red/hsa:1374%09red/hsa:5105%09red/hsa:5106%09red/hsa:336%09red/hsa:335%09red/hsa:6342%09red/hsa:345%09red/hsa:6319%09red/hsa:126129%09red/hsa:948%09red/hsa:10580%09red/hsa:8310%09red/hsa:2181%09red/hsa:2180%09red/hsa:2182%09red/hsa:440503%09red/hsa:3611%09red/hsa:79966%09red/hsa:8309%09red/…
Glycerophospholipid metabolism	KEGG PATHWAY	hsa00564	42	131	0.0404416	0.111307	Q7L5N7|Q9NRZ7|Q8IY17|Q96N66|Q8IV08|O14735|Q99447|Q9NPB8|Q92539|Q92903|O95674|Q9NVF9|Q8N335|Q9NRZ5|Q6ZWT7|P43304|Q6P1A2|Q5KSL6|Q92604|Q32NB8|P22303|Q8NF37|Q643R3|Q8NCC3|Q9HBU6|P23743|Q9NUQ2|O60733|O95372|Q99943|Q6UWP7|P49585|Q9UG56|O75608|Q13574|Q9BVG9|P21695|Q9Y5K3|P52429|O14495|O15228|Q14693	http://www.genome.jp/kegg-bin/show_pathway?hsa00564/hsa:10434%09red/hsa:55224%09red/hsa:11313%09red/hsa:10162%09red/hsa:23646%09red/hsa:8398%09red/hsa:56261%09red/hsa:254531%09red/hsa:81490%09red/hsa:10554%09red/hsa:2820%09red/hsa:54947%09red/hsa:9468%09red/hsa:23761%09red/hsa:10908%09red/hsa:79143%09red/hsa:10423%09red/hsa:5130%09red/hsa:8760%09red/hsa:23659%09red/hsa:55500%09red/hsa:23171%09red…
Adherens junction	KEGG PATHWAY	hsa04520	41	120	0.0206577	0.0726707	Q9UQB8|O60716|Q07157|P28827|P07947|P12830|P12814|P46940|P18031|Q15796|P29350|O00401|P61586|P27361|P06213|O94887|Q8TEW0|P28482|P10586|P60709|Q9BX66|Q9Y6W5|P26232|P60953|P12931|P15153|P35222|P35221|Q13485|P18206|P55196|Q8NEV1|P67870|Q9NQS3|P19784|P63000|Q9UPY6|Q12913|P24666|O43707|Q92692	http://www.genome.jp/kegg-bin/show_pathway?hsa04520/hsa:10163%09red/hsa:283106%09red/hsa:5594%09red/hsa:7414%09red/hsa:1460%09red/hsa:1500%09red/hsa:5792%09red/hsa:4301%09red/hsa:5880%09red/hsa:87%09red/hsa:81%09red/hsa:4089%09red/hsa:4087%09red/hsa:9855%09red/hsa:387%09red/hsa:60%09red/hsa:5595%09red/hsa:1499%09red/hsa:999%09red/hsa:998%09red/hsa:25945%09red/hsa:5879%09red/hsa:6714%09red/hsa:105…
Hypertrophic cardiomyopathy (HCM)	KEGG PATHWAY	hsa05410	41	123	0.0275521	0.0870066	P26006|P17301|P32418|O43741|Q9Y698|P05556|Q08289|Q13131|P05106|Q8WZ42|P24043|P06753|Q14118|P06756|Q7Z3S7|P08514|P08648|P60709|Q01668|Q13683|P13612|P68032|P23229|P18084|P16144|P54619|P07951|P01137|P09493|P56199|Q9NY47|P12883|Q8IZS8|P67936|P02545|P54289|P16615|P12821|Q13797|P50402|P11532	http://www.genome.jp/kegg-bin/show_pathway?hsa05410/hsa:93589%09red/hsa:9254%09red/hsa:2010%09red/hsa:488%09red/hsa:4000%09red/hsa:1636%09red/hsa:783%09red/hsa:781%09red/hsa:7170%09red/hsa:3693%09red/hsa:3690%09red/hsa:6546%09red/hsa:7168%09red/hsa:7169%09red/hsa:60%09red/hsa:3655%09red/hsa:3674%09red/hsa:3675%09red/hsa:3676%09red/hsa:776%09red/hsa:3672%09red/hsa:3673%09red/hsa:55799%09red/hsa:36…
Aminoacyl-tRNA biosynthesis	KEGG PATHWAY	hsa00970	40	59	4.40986e-07	1.10246e-05	P54577|P23381|P12081|Q9HA77|Q96I59|P47897|Q7L3T8|Q15046|Q96DP5|P49591|P49590|Q9BW92|P54136|O43716|Q9NSD9|O95363|Q9Y2Z4|P07814|O43776|Q9UGM6|P56192|Q9Y285|Q5JTZ9|P41250|P26640|P41252|P14868|A2RTX5|Q6PI48|Q5T160|P49588|P49589|Q15031|Q5JPH6|Q9P2J5|Q9NSE4|Q5ST30|O75879|P26639|Q9NP81	http://www.genome.jp/kegg-bin/show_pathway?hsa00970/hsa:10352%09red/hsa:8565%09red/hsa:124454%09red/hsa:79587%09red/hsa:55157%09red/hsa:25973%09red/hsa:55699%09red/hsa:6897%09red/hsa:51520%09red/hsa:80222%09red/hsa:4141%09red/hsa:7453%09red/hsa:51067%09red/hsa:1615%09red/hsa:3376%09red/hsa:123263%09red/hsa:6301%09red/hsa:3735%09red/hsa:57176%09red/hsa:283459%09red/hsa:79731%09red/hsa:4677%09red/h…
Fatty acid metabolism	KEGG PATHWAY	hsa01212	40	78	6.31587e-05	0.00069968	Q53GQ0|O95573|P40939|Q6Y1H2|Q13085|P09110|Q9BWD1|Q16836|P50897|P55084|Q15067|Q9NWU1|P16219|O15254|O00767|Q9BV79|Q9NYP7|P24752|P30084|P42765|Q9P035|Q9BY49|O60488|Q8TCG5|Q9UKU0|P28330|P50416|Q92523|Q9ULC5|P49748|Q9NZ01|Q86SK9|Q08426|P11310|O95864|P23786|P49327|P33121|P45954|Q8IVS2	http://www.genome.jp/kegg-bin/show_pathway?hsa01212/hsa:201562%09red/hsa:1376%09red/hsa:1375%09red/hsa:1374%09red/hsa:55825%09red/hsa:9524%09red/hsa:8310%09red/hsa:51144%09red/hsa:5538%09red/hsa:51102%09red/hsa:10449%09red/hsa:1892%09red/hsa:2181%09red/hsa:2180%09red/hsa:2182%09red/hsa:54995%09red/hsa:79966%09red/hsa:126129%09red/hsa:23305%09red/hsa:9415%09red/hsa:51%09red/hsa:27349%09red/hsa:34%…
Inositol phosphate metabolism	KEGG PATHWAY	hsa00562	40	107	0.0109366	0.0443374	O43426|Q00722|Q96PE3|O14735|Q8TBX8|P16885|Q15147|P60484|P60174|P49441|P29218|P48426|Q8NEB9|Q4KWH8|Q9UNW1|P42356|Q9Y217|O15357|Q02252|Q8N3E9|Q9Y2I7|P42338|Q14642|Q9NPH2|P78356|P19174|Q9BTU6|Q9NQ66|Q01970|Q9NX62|Q99755|Q13613|Q13614|Q13615|Q13572|Q01968|Q9UBF8|Q9BT40|O60331	http://www.genome.jp/kegg-bin/show_pathway?hsa00562/hsa:200576%09red/hsa:8396%09red/hsa:8394%09red/hsa:3628%09red/hsa:8776%09red/hsa:9562%09red/hsa:5289%09red/hsa:23007%09red/hsa:79837%09red/hsa:23236%09red/hsa:113026%09red/hsa:54928%09red/hsa:5728%09red/hsa:8898%09red/hsa:7167%09red/hsa:8897%09red/hsa:10423%09red/hsa:4952%09red/hsa:4329%09red/hsa:5298%09red/hsa:5336%09red/hsa:5335%09red/hsa:5332…
Proteasome	KEGG PATHWAY	hsa03050	39	70	3.79024e-05	0.00052939	O00487|O00231|O00232|P28066|P28065|P28062|P62195|O14818|Q92530|P20618|P62191|P48556|P51665|P35998|P25786|P25787|P25788|P25789|P17980|Q15008|P61289|P28074|P55036|P28070|P28072|Q13200|O43242|Q99436|P49720|P49721|P62333|Q14997|Q9UL46|Q9UNM6|P60900|Q99460|P43686|Q06323	http://www.genome.jp/kegg-bin/show_pathway?hsa03050/hsa:5689%09red/hsa:5688%09red/hsa:5687%09red/hsa:5686%09red/hsa:5685%09red/hsa:5684%09red/hsa:5683%09red/hsa:5682%09red/hsa:10197%09red/hsa:5708%09red/hsa:5709%09red/hsa:5720%09red/hsa:5707%09red/hsa:5704%09red/hsa:5705%09red/hsa:5702%09red/hsa:5700%09red/hsa:5701%09red/hsa:9491%09red/hsa:5706%09red/hsa:5698%09red/hsa:5721%09red/hsa:5694%09red/h…
Synaptic vesicle cycle	KEGG PATHWAY	hsa04721	39	86	0.000536856	0.00374551	P21281|Q93050|P54920|O94973|P53680|P60880|P61421|Q05193|Q6PUV4|Q96CW1|Q9Y487|Q13277|O95670|Q9H598|P63010|P20336|P61764|P32856|P50570|O95782|P21283|Q00610|P61266|P46459|P63027|Q9UQ16|Q13488|Q16864|P09496|P09497|Q9P2U7|Q9P2U8|P21579|P38606|Q9UI12|P36543|Q16623|P27449|Q9Y5K8	http://www.genome.jp/kegg-bin/show_pathway?hsa04721/hsa:4905%09red/hsa:8775%09red/hsa:57084%09red/hsa:1211%09red/hsa:1212%09red/hsa:1213%09red/hsa:6857%09red/hsa:535%09red/hsa:534%09red/hsa:527%09red/hsa:6812%09red/hsa:5864%09red/hsa:23545%09red/hsa:112755%09red/hsa:1173%09red/hsa:1175%09red/hsa:140679%09red/hsa:1785%09red/hsa:163%09red/hsa:160%09red/hsa:161%09red/hsa:51382%09red/hsa:9114%09red/h…
Long-term potentiation	KEGG PATHWAY	hsa04720	39	114	0.0231784	0.0781293	P62834|P16298|Q00722|P36507|Q02750|Q15147|P05129|P17612|P05771|Q15418|P36873|P62140|Q9UQM7|P27361|P17252|Q01970|Q16566|P63098|P28482|Q08209|Q14643|P50148|Q9NQ66|Q13557|P51812|Q13555|Q13554|P48454|P61224|P22694|P10398|P62158|Q14571|Q14573|P62136|P01112|P01116|P42261|P42262	http://www.genome.jp/kegg-bin/show_pathway?hsa04720/hsa:3708%09red/hsa:3709%09red/hsa:5582%09red/hsa:5604%09red/hsa:5594%09red/hsa:801%09red/hsa:5534%09red/hsa:5530%09red/hsa:5906%09red/hsa:5532%09red/hsa:5908%09red/hsa:369%09red/hsa:23236%09red/hsa:5605%09red/hsa:5499%09red/hsa:5579%09red/hsa:5595%09red/hsa:6195%09red/hsa:5332%09red/hsa:5331%09red/hsa:5330%09red/hsa:6197%09red/hsa:3710%09red/hsa…
Fatty acid degradation	KEGG PATHWAY	hsa00071	37	72	0.000112934	0.00105246	O95573|P40939|P09110|O75521|P51648|Q9BWD1|Q16836|P55084|Q15067|P16219|O15254|P49189|P30837|P40394|O60488|Q92947|P42765|P24752|P42126|Q8TCG5|Q9UKU0|P28332|P28330|P11766|P50416|Q92523|P49748|P30084|P00326|Q08426|P05091|P11310|P49419|P23786|P33121|P45954|Q9ULC5	http://www.genome.jp/kegg-bin/show_pathway?hsa00071/hsa:1376%09red/hsa:1375%09red/hsa:1374%09red/hsa:2639%09red/hsa:219%09red/hsa:8310%09red/hsa:217%09red/hsa:1632%09red/hsa:128%09red/hsa:10449%09red/hsa:1892%09red/hsa:2181%09red/hsa:2180%09red/hsa:2182%09red/hsa:224%09red/hsa:223%09red/hsa:126129%09red/hsa:501%09red/hsa:23305%09red/hsa:38%09red/hsa:51%09red/hsa:34%09red/hsa:30%09red/hsa:33%09red…
Arrhythmogenic right ventricular cardiomyopathy (ARVC)	KEGG PATHWAY	hsa05412	37	105	0.00864395	0.0378973	P26006|P17301|P32418|P19022|Q9Y698|P05556|Q08289|P15924|P05106|P23229|P12814|P24043|Q14118|P06756|Q7Z3S7|P08514|P08648|P60709|Q01668|Q13683|P13612|P18084|P14923|P16144|P26232|Q99959|P35222|P35221|P56199|Q9NY47|Q8IZS8|P02545|Q14126|P54289|P16615|Q13797|P50402|O43707|P11532	http://www.genome.jp/kegg-bin/show_pathway?hsa05412/hsa:5318%09red/hsa:3728%09red/hsa:93589%09red/hsa:9254%09red/hsa:488%09red/hsa:4000%09red/hsa:3655%09red/hsa:783%09red/hsa:1832%09red/hsa:781%09red/hsa:87%09red/hsa:81%09red/hsa:3690%09red/hsa:6546%09red/hsa:60%09red/hsa:3693%09red/hsa:3674%09red/hsa:3675%09red/hsa:3676%09red/hsa:776%09red/hsa:3672%09red/hsa:3673%09red/hsa:55799%09red/hsa:3691%0…
Pertussis	KEGG PATHWAY	hsa05133	37	117	0.0309701	0.0948065	Q15759|P08754|P61586|Q9Y4K3|P05556|P08571|P45984|P05107|P01024|P20851|P19838|P63096|P08648|P27361|P29466|Q9NWZ3|P01100|P04899|P28482|P53778|P53779|P0C0L5|P0C0L4|P05155|Q04206|Q9Y281|P23528|P09871|P00736|P11215|P04003|Q16539|P62158|P02747|P02746|P01031|P06681|P42574|O15264	http://www.genome.jp/kegg-bin/show_pathway?hsa05133/hsa:725%09red/hsa:727%09red/hsa:721%09red/hsa:722%09red/hsa:801%09red/hsa:929%09red/hsa:1072%09red/hsa:1073%09red/hsa:7189%09red/hsa:5603%09red/hsa:5602%09red/hsa:5601%09red/hsa:5600%09red/hsa:6300%09red/hsa:387%09red/hsa:834%09red/hsa:5595%09red/hsa:5594%09red/hsa:2353%09red/hsa:2770%09red/hsa:2773%09red/hsa:3678%09red/hsa:1432%09red/hsa:4790%0…
Central carbon metabolism in cancer	KEGG PATHWAY	hsa05230	37	111	0.0348406	0.101477	Q02750|P31749|P36507|P19367|O15427|P18669|P60484|P08559|Q9NTG7|P08237|P14618|Q9NQ88|P00338|Q2TB90|P27361|Q01813|P11177|P17858|O94925|P28482|O75874|P42338|P09619|P31751|P35557|Q9UI32|O00459|P27986|Q15118|P11413|P01112|P01116|Q9Y243|P11166|Q01650|O43819|P42345	http://www.genome.jp/kegg-bin/show_pathway?hsa05230/hsa:2539%09red/hsa:10000%09red/hsa:5213%09red/hsa:57103%09red/hsa:9997%09red/hsa:3939%09red/hsa:2744%09red/hsa:80201%09red/hsa:5728%09red/hsa:5211%09red/hsa:5605%09red/hsa:5604%09red/hsa:5214%09red/hsa:3417%09red/hsa:5315%09red/hsa:8140%09red/hsa:5595%09red/hsa:5594%09red/hsa:27165%09red/hsa:5291%09red/hsa:2645%09red/hsa:5295%09red/hsa:5296%09re…
B cell receptor signaling pathway	KEGG PATHWAY	hsa04662	37	112	0.0382376	0.107208	Q02750|P31749|P36507|Q04206|P15498|P16885|Q9Y6K9|P16298|P05771|Q9UDY8|Q15653|P07948|P62993|P42338|P60033|P29350|P19838|O14920|P43405|P01100|P27361|P63098|P01116|P28482|Q07889|Q08209|P31751|P15153|P48454|O00459|P27986|Q06187|P63000|P01112|P49841|O15357|Q9Y243	http://www.genome.jp/kegg-bin/show_pathway?hsa04662/hsa:7409%09red/hsa:10000%09red/hsa:2885%09red/hsa:5594%09red/hsa:6850%09red/hsa:4067%09red/hsa:5579%09red/hsa:5534%09red/hsa:5296%09red/hsa:5530%09red/hsa:5533%09red/hsa:5532%09red/hsa:5880%09red/hsa:5605%09red/hsa:5604%09red/hsa:2353%09red/hsa:3551%09red/hsa:5336%09red/hsa:5595%09red/hsa:8517%09red/hsa:5291%09red/hsa:4793%09red/hsa:4790%09red/h…
Amino sugar and nucleotide sugar metabolism	KEGG PATHWAY	hsa00520	36	72	0.000209317	0.00172527	P00387|P06744|P51606|Q16851|Q96G03|O60701|Q9UJ70|P46926|P07902|P06865|Q8NFW8|P19367|P36871|Q9Y5P6|Q06210|P34949|Q9Y303|Q3KQV9|Q2TB90|P07686|P51570|Q96IJ6|Q9UHQ9|Q9NR45|Q16222|O60547|Q8NBZ7|P35557|Q9Y223|Q6BCY4|Q13630|O95394|O15305|Q14376|Q92871|Q8N0W3	http://www.genome.jp/kegg-bin/show_pathway?hsa00520/hsa:10007%09red/hsa:7264%09red/hsa:2673%09red/hsa:55577%09red/hsa:55907%09red/hsa:91373%09red/hsa:1727%09red/hsa:7360%09red/hsa:2821%09red/hsa:2762%09red/hsa:2582%09red/hsa:80201%09red/hsa:2584%09red/hsa:5236%09red/hsa:55276%09red/hsa:51005%09red/hsa:5238%09red/hsa:5373%09red/hsa:5372%09red/hsa:2645%09red/hsa:3098%09red/hsa:5973%09red/hsa:54187%…
VEGF signaling pathway	KEGG PATHWAY	hsa04370	36	98	0.012838	0.0492539	Q15759|Q02750|P31749|P49023|P36507|P16885|P05129|P16298|P05771|P04792|Q08209|P27361|P63098|Q05397|P28482|P53778|Q9Y243|P42338|P17252|P19174|P60953|P31751|P12931|P15153|P48454|P49137|O00459|Q16644|P27986|Q16539|P63000|P01112|P01116|P29474|O15264|Q92934	http://www.genome.jp/kegg-bin/show_pathway?hsa04370/hsa:5582%09red/hsa:572%09red/hsa:5595%09red/hsa:5579%09red/hsa:5534%09red/hsa:5530%09red/hsa:5533%09red/hsa:5532%09red/hsa:3315%09red/hsa:5747%09red/hsa:5880%09red/hsa:5605%09red/hsa:5604%09red/hsa:5603%09red/hsa:5600%09red/hsa:6300%09red/hsa:9261%09red/hsa:5336%09red/hsa:5335%09red/hsa:5594%09red/hsa:5578%09red/hsa:5291%09red/hsa:998%09red/hsa:…
Long-term depression	KEGG PATHWAY	hsa04730	36	104	0.0249044	0.0830147	Q02750|Q00722|P10398|P36507|P08754|P17252|Q15147|P19086|P05129|P05771|P07948|Q14344|Q03113|Q13237|Q02108|P63096|P27361|Q14643|Q01970|P04899|P28482|P30153|P09471|P67775|Q9NQ66|P50148|Q02153|P29992|Q14571|Q14573|P01112|P62714|P01116|P42261|P42262|Q13976	http://www.genome.jp/kegg-bin/show_pathway?hsa04730/hsa:3708%09red/hsa:3709%09red/hsa:5582%09red/hsa:2982%09red/hsa:23236%09red/hsa:10672%09red/hsa:4067%09red/hsa:5592%09red/hsa:5579%09red/hsa:5578%09red/hsa:2767%09red/hsa:2983%09red/hsa:5518%09red/hsa:5516%09red/hsa:5515%09red/hsa:2768%09red/hsa:5605%09red/hsa:5604%09red/hsa:5595%09red/hsa:5594%09red/hsa:5593%09red/hsa:5332%09red/hsa:5331%09red/…
Fc epsilon RI signaling pathway	KEGG PATHWAY	hsa04664	35	105	0.03923	0.108972	Q15759|Q02750|P31749|P36507|P15498|P16885|O14733|P45984|P45985|P07948|P53779|P62993|Q13094|P43405|P27361|P30273|P28482|P53778|Q07889|P42338|P17252|P19174|P27986|P31751|P15153|O00459|Q06187|P52564|O15530|Q16539|P63000|P01112|P01116|Q9Y243|O15264	http://www.genome.jp/kegg-bin/show_pathway?hsa04664/hsa:7409%09red/hsa:10000%09red/hsa:2885%09red/hsa:5595%09red/hsa:3937%09red/hsa:6850%09red/hsa:4067%09red/hsa:5578%09red/hsa:5880%09red/hsa:5605%09red/hsa:5604%09red/hsa:5603%09red/hsa:5602%09red/hsa:5601%09red/hsa:5600%09red/hsa:6300%09red/hsa:5170%09red/hsa:5609%09red/hsa:5608%09red/hsa:5336%09red/hsa:5335%09red/hsa:5594%09red/hsa:5291%09red/h…
Pyruvate metabolism	KEGG PATHWAY	hsa00620	34	60	5.00698e-05	0.000612918	P30613|P51648|Q9BWD1|Q04760|Q9UBQ7|P08559|Q16798|P09622|P00338|P14618|P23368|P49189|P10515|P07311|P30837|Q9NUB1|Q16775|P24752|P11177|P40925|P40926|P07954|P14621|P35558|Q86WU2|P11498|P48163|Q16822|P05091|Q13085|P49419|Q6ZMR3|Q9NR19|P07195	http://www.genome.jp/kegg-bin/show_pathway?hsa00620/hsa:5105%09red/hsa:5106%09red/hsa:219%09red/hsa:55902%09red/hsa:84532%09red/hsa:3939%09red/hsa:217%09red/hsa:3029%09red/hsa:4200%09red/hsa:2271%09red/hsa:5091%09red/hsa:5315%09red/hsa:97%09red/hsa:5313%09red/hsa:224%09red/hsa:9380%09red/hsa:223%09red/hsa:3945%09red/hsa:501%09red/hsa:1738%09red/hsa:1737%09red/hsa:31%09red/hsa:10873%09red/hsa:39%0…
Glutathione metabolism	KEGG PATHWAY	hsa00480	33	79	0.00384584	0.0189139	Q7RTV2|O95881|P48637|O75223|P48507|P09488|P15144|P09211|Q9Y2Q3|P22352|P28838|Q9UJ14|P48735|P36269|P28161|O15217|P52209|O14841|P00390|P78417|P36969|Q96SL4|P52788|P19623|Q7LG56|O14880|P48506|P21266|P07203|Q99735|P11413|O75874|P23921	http://www.genome.jp/kegg-bin/show_pathway?hsa00480/hsa:2539%09red/hsa:50484%09red/hsa:9446%09red/hsa:2882%09red/hsa:6723%09red/hsa:2941%09red/hsa:290%09red/hsa:2686%09red/hsa:2687%09red/hsa:2947%09red/hsa:2946%09red/hsa:51060%09red/hsa:221357%09red/hsa:3417%09red/hsa:3418%09red/hsa:373156%09red/hsa:2729%09red/hsa:6240%09red/hsa:6611%09red/hsa:2944%09red/hsa:2936%09red/hsa:2937%09red/hsa:2876%09r…
SNARE interactions in vesicular transport	KEGG PATHWAY	hsa04130	31	43	3.42706e-06	7.34369e-05	O60499|O95249|O00161|Q13190|Q96AJ9|P51809|Q13277|O95183|O15400|Q9UEU0|Q12981|Q12846|P32856|Q15836|P61266|O15498|O43752|O75396|P63027|O75558|Q9NYM9|P23763|Q9BV40|Q9P2W9|Q9UNK0|O14662|Q9NZ43|O75379|P56962|Q16623|O95721	http://www.genome.jp/kegg-bin/show_pathway?hsa04130/hsa:10791%09red/hsa:10652%09red/hsa:662%09red/hsa:8773%09red/hsa:10490%09red/hsa:9527%09red/hsa:6811%09red/hsa:6810%09red/hsa:112755%09red/hsa:53407%09red/hsa:143187%09red/hsa:10228%09red/hsa:9342%09red/hsa:9341%09red/hsa:8417%09red/hsa:6844%09red/hsa:6809%09red/hsa:55014%09red/hsa:9554%09red/hsa:6843%09red/hsa:6804%09red/hsa:55850%09red/hsa:684…
Endocrine and other factor-regulated calcium reabsorption	KEGG PATHWAY	hsa04961	31	65	0.00101559	0.00648251	P32418|Q00722|P05023|O94973|P05129|P53680|P05026|O43306|Q00610|Q15147|Q05193|P17612|P05771|P50993|P13637|P63010|P05937|P14415|Q01970|P50570|O95782|P54709|Q96CW1|P17252|P50148|Q9NQ66|Q9UQ16|P09496|P09497|P22694|P20020	http://www.genome.jp/kegg-bin/show_pathway?hsa04961/hsa:5582%09red/hsa:1211%09red/hsa:1212%09red/hsa:1213%09red/hsa:481%09red/hsa:483%09red/hsa:482%09red/hsa:5579%09red/hsa:5578%09red/hsa:1173%09red/hsa:1175%09red/hsa:5567%09red/hsa:1785%09red/hsa:163%09red/hsa:160%09red/hsa:6546%09red/hsa:5332%09red/hsa:5331%09red/hsa:5330%09red/hsa:161%09red/hsa:23236%09red/hsa:1759%09red/hsa:490%09red/hsa:478%…
Arginine and proline metabolism	KEGG PATHWAY	hsa00330	31	75	0.00560867	0.0271387	P21397|P27338|P51648|P78540|P30038|P54886|P30837|Q86XE5|P05089|P28838|P19623|P49189|O15460|P13674|Q9BSE5|P29474|P04181|P12277|P52788|Q96F10|P17540|P17174|P50440|P32322|Q96KP4|P05091|P00505|P49419|Q96C36|P12532|Q14353	http://www.genome.jp/kegg-bin/show_pathway?hsa00330/hsa:4942%09red/hsa:8659%09red/hsa:79814%09red/hsa:219%09red/hsa:5831%09red/hsa:8974%09red/hsa:6723%09red/hsa:112483%09red/hsa:4129%09red/hsa:4128%09red/hsa:55748%09red/hsa:217%09red/hsa:2805%09red/hsa:2806%09red/hsa:1152%09red/hsa:383%09red/hsa:384%09red/hsa:112817%09red/hsa:224%09red/hsa:223%09red/hsa:548596%09red/hsa:5033%09red/hsa:2628%09red/…
Lysine degradation	KEGG PATHWAY	hsa00310	30	65	0.00312672	0.0158986	P40939|O15047|Q8NBJ5|P51648|Q9BWD1|Q16836|P36957|Q15047|Q9NVH6|Q96KQ7|P30837|P24752|Q92947|Q02809|Q9ULD0|Q9UDR5|P30084|Q7Z624|Q02218|O14686|O60568|Q8WTS6|Q9BYW2|Q08426|P05091|Q9H9B1|P49419|Q8NEZ4|P49189	http://www.genome.jp/kegg-bin/show_pathway?hsa00310/hsa:5351%09red/hsa:4967%09red/hsa:79709%09red/hsa:79813%09red/hsa:29072%09red/hsa:2639%09red/hsa:219%09red/hsa:217%09red/hsa:1743%09red/hsa:8985%09red/hsa:8085%09red/hsa:1892%09red/hsa:10157%09red/hsa:58508%09red/hsa:80854%09red/hsa:224%09red/hsa:223%09red/hsa:10919%09red/hsa:79823%09red/hsa:501%09red/hsa:55753%09red/hsa:9739%09red/hsa:39%09red/…
Propanoate metabolism	KEGG PATHWAY	hsa00640	29	52	0.000212783	0.00172527	Q96I99|P40939|P05166|P05165|Q13085|P80404|Q9BWD1|P09622|Q9NUB1|Q9NTX5|P12694|P24752|Q9H6R3|Q9P2R7|Q02252|Q6NVY1|Q96PE7|P30084|Q08426|P11182|P21953|P53597|P22033|O95822|P11310|P00338|Q6ZMR3|Q9NR19|P07195	http://www.genome.jp/kegg-bin/show_pathway?hsa00640/hsa:594%09red/hsa:593%09red/hsa:55902%09red/hsa:84532%09red/hsa:3939%09red/hsa:26275%09red/hsa:55862%09red/hsa:5096%09red/hsa:5095%09red/hsa:1892%09red/hsa:39%09red/hsa:4329%09red/hsa:31%09red/hsa:3945%09red/hsa:79611%09red/hsa:18%09red/hsa:1738%09red/hsa:8802%09red/hsa:8803%09red/hsa:8801%09red/hsa:4594%09red/hsa:34%09red/hsa:1629%09red/hsa:38%…
Vasopressin-regulated water reabsorption	KEGG PATHWAY	hsa04962	29	69	0.00603529	0.0287395	Q15907|O43237|P51148|O43306|P55087|P17612|P61020|Q14203|Q14204|Q13561|Q9UJW0|Q12846|Q99819|P20339|Q8NCM8|P46459|P63027|P52566|P52565|Q96FJ2|P22694|O14576|Q13409|P63167|Q9Y6G9|Q9BTE1|O60266|O00399|P30518	http://www.genome.jp/kegg-bin/show_pathway?hsa04962/hsa:4905%09red/hsa:8655%09red/hsa:10671%09red/hsa:5869%09red/hsa:5868%09red/hsa:6810%09red/hsa:554%09red/hsa:84516%09red/hsa:112%09red/hsa:1783%09red/hsa:1780%09red/hsa:1781%09red/hsa:140735%09red/hsa:51143%09red/hsa:51164%09red/hsa:1639%09red/hsa:79659%09red/hsa:6844%09red/hsa:5878%09red/hsa:361%09red/hsa:109%09red/hsa:397%09red/hsa:10540%09red…
Cysteine and methionine metabolism	KEGG PATHWAY	hsa00270	29	72	0.00946415	0.0405607	Q96GA7|Q9UHY7|P31153|P48507|P48506|Q99707|O43865|Q93088|Q96HN2|P00338|Q00266|P40925|P40926|P48637|P23526|P52788|P25325|Q13126|P19623|Q96GX9|P17174|Q9BV20|O15382|P00505|P54687|Q9NZL9|Q6ZMR3|P07195|Q16762	http://www.genome.jp/kegg-bin/show_pathway?hsa00270/hsa:10768%09red/hsa:6723%09red/hsa:191%09red/hsa:3939%09red/hsa:27430%09red/hsa:4143%09red/hsa:2805%09red/hsa:2806%09red/hsa:4144%09red/hsa:7263%09red/hsa:84245%09red/hsa:4507%09red/hsa:4548%09red/hsa:2729%09red/hsa:635%09red/hsa:23382%09red/hsa:3945%09red/hsa:586%09red/hsa:587%09red/hsa:113675%09red/hsa:6611%09red/hsa:2937%09red/hsa:51074%09red…
Vibrio cholerae infection	KEGG PATHWAY	hsa05110	29	83	0.0374724	0.106697	Q15904|Q93050|Q07157|Q96HE7|P61421|P16885|Q9UDY2|P17612|Q9Y487|O95670|P24390|P55011|P60468|O60266|P21281|P21283|P60709|P17252|P19174|Q13488|Q16864|P22694|P38606|Q9UI12|P36543|P61619|P27449|P13667|Q9Y5K8	http://www.genome.jp/kegg-bin/show_pathway?hsa05110/hsa:9601%09red/hsa:528%09red/hsa:535%09red/hsa:534%09red/hsa:537%09red/hsa:10945%09red/hsa:23545%09red/hsa:5578%09red/hsa:51382%09red/hsa:109%09red/hsa:9114%09red/hsa:60%09red/hsa:5336%09red/hsa:5335%09red/hsa:30001%09red/hsa:10952%09red/hsa:529%09red/hsa:526%09red/hsa:527%09red/hsa:9414%09red/hsa:523%09red/hsa:7082%09red/hsa:29927%09red/hsa:516…
Citrate cycle (TCA cycle)	KEGG PATHWAY	hsa00020	27	51	0.000637781	0.00434851	Q96I99|P21399|P08559|P36957|P09622|P48735|P10515|P11177|P51553|Q9P2R7|P31040|Q99798|O75390|P40925|P40926|P07954|Q02218|P21912|P35558|P53597|P50213|P11498|Q16822|P53396|O75874|O43837|Q9ULD0	http://www.genome.jp/kegg-bin/show_pathway?hsa00020/hsa:4967%09red/hsa:5105%09red/hsa:5106%09red/hsa:1743%09red/hsa:6389%09red/hsa:48%09red/hsa:2271%09red/hsa:5091%09red/hsa:3418%09red/hsa:3419%09red/hsa:47%09red/hsa:8802%09red/hsa:1431%09red/hsa:3417%09red/hsa:55753%09red/hsa:1738%09red/hsa:1737%09red/hsa:6390%09red/hsa:8803%09red/hsa:8801%09red/hsa:50%09red/hsa:3421%09red/hsa:3420%09red/hsa:419…
N-Glycan biosynthesis	KEGG PATHWAY	hsa00510	27	64	0.00757337	0.0344244	Q9NR34|Q09328|Q9BYC5|Q9H3H5|P39656|O60476|Q9UKM7|O60762|Q96F25|Q13724|P26572|Q9H553|Q9UBM8|Q2TAA5|P49641|Q14697|Q9H6U8|P33908|Q9BT22|Q10469|P46977|Q8TCJ2|Q9Y673|P04844|P61803|P04843|Q16706	http://www.genome.jp/kegg-bin/show_pathway?hsa00510/hsa:6185%09red/hsa:6184%09red/hsa:2530%09red/hsa:3703%09red/hsa:4124%09red/hsa:4121%09red/hsa:56052%09red/hsa:4122%09red/hsa:85365%09red/hsa:10905%09red/hsa:1650%09red/hsa:8813%09red/hsa:4249%09red/hsa:79796%09red/hsa:4245%09red/hsa:4247%09red/hsa:201595%09red/hsa:57134%09red/hsa:440138%09red/hsa:25834%09red/hsa:199857%09red/hsa:23193%09red/hsa:…
Fructose and mannose metabolism	KEGG PATHWAY	hsa00051	26	52	0.00149666	0.00880391	P05062|P19367|Q8N0W3|P15121|O60825|Q16875|Q9Y5P6|P60174|P34949|Q3LXA3|Q9NQ88|Q2TB90|Q01813|Q00796|Q96IJ6|P08237|O60547|O00757|Q13630|P09467|O15305|P17858|P09972|O60218|P04075|Q92871	http://www.genome.jp/kegg-bin/show_pathway?hsa00051/hsa:230%09red/hsa:231%09red/hsa:57103%09red/hsa:2762%09red/hsa:26007%09red/hsa:7264%09red/hsa:80201%09red/hsa:5211%09red/hsa:5213%09red/hsa:5214%09red/hsa:7167%09red/hsa:226%09red/hsa:8789%09red/hsa:5373%09red/hsa:5372%09red/hsa:229%09red/hsa:3098%09red/hsa:6652%09red/hsa:57016%09red/hsa:29925%09red/hsa:197258%09red/hsa:29926%09red/hsa:5209%09re…
Glyoxylate and dicarboxylate metabolism	KEGG PATHWAY	hsa00630	25	44	0.0017651	0.00962783	P05166|P05165|Q9NYQ3|P34896|P34897|P21399|Q9BWD1|Q9UBQ7|P09622|P15104|Q5T013|P24752|Q99798|Q86XE5|Q96PE7|O75390|P40925|P40926|A6NDG6|P22033|P04040|P48728|P23378	http://www.genome.jp/kegg-bin/show_pathway?hsa00630/hsa:847%09red/hsa:283871%09red/hsa:48%09red/hsa:275%09red/hsa:5096%09red/hsa:5095%09red/hsa:9380%09red/hsa:84693%09red/hsa:112817%09red/hsa:1738%09red/hsa:81888%09red/hsa:1431%09red/hsa:4594%09red/hsa:50%09red/hsa:39%09red/hsa:38%09red/hsa:2752%09red/hsa:6470%09red/hsa:6472%09red/hsa:4190%09red/hsa:4191%09red/hsa:2731%09red/hsa:51179%09red
Prion diseases	KEGG PATHWAY	hsa05020	24	58	0.013508	0.0506552	Q02750|P36507|Q07812|P07357|P17612|P07358|P04156|O15394|P13501|P31948|P27361|P13671|P02746|P28482|P10643|P11047|P22694|P07360|P02747|P13591|P11021|P01031|P02748|P00441	http://www.genome.jp/kegg-bin/show_pathway?hsa05020/hsa:3915%09red/hsa:4685%09red/hsa:6647%09red/hsa:727%09red/hsa:735%09red/hsa:10963%09red/hsa:5621%09red/hsa:714%09red/hsa:5605%09red/hsa:5604%09red/hsa:5595%09red/hsa:5594%09red/hsa:4684%09red/hsa:581%09red/hsa:713%09red/hsa:733%09red/hsa:732%09red/hsa:731%09red/hsa:730%09red/hsa:3309%09red/hsa:5566%09red/hsa:5567%09red/hsa:6352%09red/hsa:729%09…
Pentose phosphate pathway	KEGG PATHWAY	hsa00030	23	39	0.000519375	0.00370982	P05062|P11908|Q96AT9|Q15493|O95479|Q96G03|P36871|P11413|P04075|Q01813|Q9Y315|P52209|P29401|P08237|Q9H477|O95336|P06744|P60891|O00757|P37837|P09467|P17858|P09972	http://www.genome.jp/kegg-bin/show_pathway?hsa00030/hsa:2539%09red/hsa:230%09red/hsa:9563%09red/hsa:2821%09red/hsa:64080%09red/hsa:5236%09red/hsa:5211%09red/hsa:5213%09red/hsa:5214%09red/hsa:55276%09red/hsa:226%09red/hsa:8789%09red/hsa:6888%09red/hsa:229%09red/hsa:7086%09red/hsa:5631%09red/hsa:51071%09red/hsa:5634%09red/hsa:5226%09red/hsa:25796%09red/hsa:6120%09red/hsa:9104%09red/hsa:2203%09red
Nucleotide excision repair	KEGG PATHWAY	hsa03420	22	60	0.0449503	0.119337	P40938|P41208|P32780|P51948|P40937|P54727|P54725|P15927|Q92889|Q13620|P18074|P07992|Q01831|P35244|P35249|P35251|Q13619|Q16531|P27694|Q6P1K8|P35250|P12004	http://www.genome.jp/kegg-bin/show_pathway?hsa03420/hsa:728340%09red/hsa:6117%09red/hsa:2965%09red/hsa:2067%09red/hsa:5887%09red/hsa:5886%09red/hsa:5981%09red/hsa:5982%09red/hsa:5983%09red/hsa:5984%09red/hsa:8450%09red/hsa:6118%09red/hsa:6119%09red/hsa:5111%09red/hsa:2068%09red/hsa:1069%09red/hsa:1642%09red/hsa:8451%09red/hsa:2072%09red/hsa:7508%09red/hsa:5985%09red/hsa:4331%09red
Tryptophan metabolism	KEGG PATHWAY	hsa00380	21	56	0.0419618	0.11341	P21397|P24752|Q08426|P04040|P27338|Q8TDX5|P49189|P40939|P05091|P30837|P51648|P49419|Q9BWD1|Q16836|Q16773|Q02218|P30084|Q92947|Q6YP21|O15229|Q9ULD0	http://www.genome.jp/kegg-bin/show_pathway?hsa00380/hsa:224%09red/hsa:8564%09red/hsa:223%09red/hsa:219%09red/hsa:39%09red/hsa:3033%09red/hsa:3030%09red/hsa:2639%09red/hsa:130013%09red/hsa:847%09red/hsa:1962%09red/hsa:501%09red/hsa:55753%09red/hsa:56267%09red/hsa:1892%09red/hsa:4967%09red/hsa:883%09red/hsa:38%09red/hsa:4129%09red/hsa:4128%09red/hsa:217%09red
Protein export	KEGG PATHWAY	hsa03060	20	36	0.00200486	0.0105519	Q9BY50|O76094|P49458|P09132|Q96T52|P67812|P08240|Q9Y6A9|Q15005|P61009|P37108|Q99442|Q15070|P11021|Q9UHB9|Q9Y5M8|Q9UGP8|P61011|P61619|P60468	http://www.genome.jp/kegg-bin/show_pathway?hsa03060/hsa:90701%09red/hsa:9789%09red/hsa:83943%09red/hsa:10952%09red/hsa:29927%09red/hsa:11231%09red/hsa:5018%09red/hsa:23478%09red/hsa:3309%09red/hsa:58477%09red/hsa:6727%09red/hsa:6730%09red/hsa:6726%09red/hsa:60559%09red/hsa:6734%09red/hsa:28972%09red/hsa:6729%09red/hsa:6728%09red/hsa:6731%09red/hsa:7095%09red
beta-Alanine metabolism	KEGG PATHWAY	hsa00410	20	46	0.0155912	0.057041	Q02252|P40939|O95822|Q96KP4|Q12882|P49189|P05091|P11310|P30837|P51648|P49419|P43353|Q16853|Q08426|P80404|P52788|P30084|P19623|Q14117|Q6NVY1	http://www.genome.jp/kegg-bin/show_pathway?hsa00410/hsa:224%09red/hsa:1807%09red/hsa:18%09red/hsa:221%09red/hsa:34%09red/hsa:223%09red/hsa:219%09red/hsa:23417%09red/hsa:3030%09red/hsa:55748%09red/hsa:1892%09red/hsa:1806%09red/hsa:1962%09red/hsa:501%09red/hsa:6723%09red/hsa:6611%09red/hsa:8639%09red/hsa:26275%09red/hsa:4329%09red/hsa:217%09red
Galactose metabolism	KEGG PATHWAY	hsa00052	19	46	0.0263369	0.085832	P15121|P08237|P10253|P19367|P06280|Q16851|P07902|Q96G03|P35557|P17858|Q01813|Q2TB90|O60218|Q14376|P16278|P51570|Q96C23|Q2M2H8|P36871	http://www.genome.jp/kegg-bin/show_pathway?hsa00052/hsa:2720%09red/hsa:7360%09red/hsa:231%09red/hsa:130589%09red/hsa:2592%09red/hsa:93432%09red/hsa:2582%09red/hsa:2645%09red/hsa:80201%09red/hsa:2584%09red/hsa:5236%09red/hsa:5211%09red/hsa:5213%09red/hsa:5214%09red/hsa:2548%09red/hsa:2717%09red/hsa:55276%09red/hsa:3098%09red/hsa:57016%09red
Proximal tubule bicarbonate reclamation	KEGG PATHWAY	hsa04964	17	33	0.00743406	0.0343111	O94925|P49448|P29972|Q9UBX3|P22748|P05023|P00367|P50993|P40925|P05026|P00918|P13637|P14415|P54709|P35558|Q16822|Q9UI32	http://www.genome.jp/kegg-bin/show_pathway?hsa04964/hsa:760%09red/hsa:762%09red/hsa:478%09red/hsa:27165%09red/hsa:2747%09red/hsa:2746%09red/hsa:2744%09red/hsa:5105%09red/hsa:5106%09red/hsa:4190%09red/hsa:481%09red/hsa:483%09red/hsa:482%09red/hsa:358%09red/hsa:476%09red/hsa:477%09red/hsa:1468%09red
Biosynthesis of unsaturated fatty acids	KEGG PATHWAY	hsa01040	15	32	0.0210997	0.0727577	Q6Y1H2|O00767|P40939|Q9P035|Q9BY49|Q53GQ0|P09110|O95864|Q9NYP7|Q86TX2|Q15067|O00154|O15254|Q86SK9|Q9NZ01	http://www.genome.jp/kegg-bin/show_pathway?hsa01040/hsa:30%09red/hsa:51%09red/hsa:201562%09red/hsa:3030%09red/hsa:79966%09red/hsa:6319%09red/hsa:641371%09red/hsa:51144%09red/hsa:55825%09red/hsa:11332%09red/hsa:9524%09red/hsa:9415%09red/hsa:60481%09red/hsa:51495%09red/hsa:8310%09red
Fatty acid elongation	KEGG PATHWAY	hsa00062	15	32	0.0376995	0.106697	P42765|Q53GQ0|P40939|Q9P035|Q6Y1H2|P30084|Q9BV79|Q9NYP7|Q16836|P50897|P55084|Q86TX2|O00154|Q9NZ01	http://www.genome.jp/kegg-bin/show_pathway?hsa00062/hsa:201562%09red/hsa:3033%09red/hsa:3030%09red/hsa:641371%09red/hsa:5538%09red/hsa:11332%09red/hsa:51144%09red/hsa:51102%09red/hsa:51495%09red/hsa:10449%09red/hsa:1892%09red/hsa:3032%09red/hsa:9524%09red/hsa:60481%09red
2-Oxocarboxylic acid metabolism	KEGG PATHWAY	hsa01210	14	27	0.0138675	0.051361	P50213|P17174|Q99798|P48735|Q03154|O75390|O15382|P21399|Q8TD30|P00505|P54687|O43837|O75874|P51553	http://www.genome.jp/kegg-bin/show_pathway?hsa01210/hsa:2805%09red/hsa:2806%09red/hsa:1431%09red/hsa:3421%09red/hsa:3420%09red/hsa:586%09red/hsa:587%09red/hsa:48%09red/hsa:84706%09red/hsa:95%09red/hsa:3417%09red/hsa:3418%09red/hsa:3419%09red/hsa:50%09red
One carbon pool by folate	KEGG PATHWAY	hsa00670	14	30	0.0260506	0.085832	P11586|Q6UB35|P48728|O95954|P34896|P31939|P34897|P22102|Q99707|P13995|Q9H903|P49914|Q3SY69|Q96DP5	http://www.genome.jp/kegg-bin/show_pathway?hsa00670/hsa:441024%09red/hsa:10841%09red/hsa:4522%09red/hsa:25902%09red/hsa:10588%09red/hsa:160428%09red/hsa:6470%09red/hsa:123263%09red/hsa:2618%09red/hsa:6472%09red/hsa:10797%09red/hsa:275%09red/hsa:471%09red/hsa:4548%09red
Terpenoid backbone biosynthesis	KEGG PATHWAY	hsa00900	14	31	0.0314855	0.0954108	Q9UHG3|P14324|Q86YH6|P24752|P49354|O60725|Q15126|O95749|Q9BWD1|P53602|Q13907|Q03426|Q01581|O75844	http://www.genome.jp/kegg-bin/show_pathway?hsa00900/hsa:3422%09red/hsa:4598%09red/hsa:23463%09red/hsa:4597%09red/hsa:51449%09red/hsa:9453%09red/hsa:3157%09red/hsa:10269%09red/hsa:10654%09red/hsa:39%09red/hsa:2339%09red/hsa:57107%09red/hsa:38%09red/hsa:2224%09red
Mismatch repair	KEGG PATHWAY	hsa03430	14	33	0.0447418	0.119337	P35244|P40938|P35250|P20585|P52701|P40692|Q04837|P35251|P40937|P27694|P35249|P15927|P12004|P43246	http://www.genome.jp/kegg-bin/show_pathway?hsa03430/hsa:6742%09red/hsa:4437%09red/hsa:2956%09red/hsa:4436%09red/hsa:5111%09red/hsa:4292%09red/hsa:6117%09red/hsa:5981%09red/hsa:5982%09red/hsa:5983%09red/hsa:5984%09red/hsa:5985%09red/hsa:6118%09red/hsa:6119%09red
Pantothenate and CoA biosynthesis	KEGG PATHWAY	hsa00770	12	21	0.0129702	0.0492539	O95498|Q8TE04|Q9NRN7|Q96CD2|O15382|P22413|Q12882|Q9NVE7|P54687|Q13057|Q14117|Q9HAB8	http://www.genome.jp/kegg-bin/show_pathway?hsa00770/hsa:1807%09red/hsa:1806%09red/hsa:79717%09red/hsa:586%09red/hsa:587%09red/hsa:80347%09red/hsa:55229%09red/hsa:53354%09red/hsa:8875%09red/hsa:60496%09red/hsa:5167%09red/hsa:60490%09red
Other glycan degradation	KEGG PATHWAY	hsa00511	12	25	0.0327386	0.0972156	Q9NTJ4|P04062|Q9Y2E5|P04066|O00754|Q99519|P16278|P07686|O00462|P06865|Q9HCG7|Q9BTY2	http://www.genome.jp/kegg-bin/show_pathway?hsa00511/hsa:57704%09red/hsa:2519%09red/hsa:2517%09red/hsa:4758%09red/hsa:2629%09red/hsa:23324%09red/hsa:4125%09red/hsa:4126%09red/hsa:4123%09red/hsa:2720%09red/hsa:3074%09red/hsa:3073%09red
Sulfur metabolism	KEGG PATHWAY	hsa00920	9	19	0.0326797	0.0972156	O95571|O43252|Q9Y6N5|O95861|O95340|P99999|P25325|Q16762|Q9NX62|P51687	http://www.genome.jp/kegg-bin/show_pathway?hsa00920/hsa:54928%09red/hsa:9061%09red/hsa:9060%09red/hsa:23474%09red/hsa:54205%09red/hsa:7263%09red/hsa:58472%09red/hsa:4357%09red/hsa:6821%09red/hsa:10380%09red
